# Supplementary material for: Tomato Xylem Sap Hydrophobins Vdh4 and Vdh5 Are Important for Late Stages of Verticillium dahliae Plant Infection
Source: J Fungi (Basel). 2022 Nov 27;8(12):1252. doi: 10.3390/jof8121252 (PMC9783231; doi:10.3390/jof8121252)
Supplement: Supplementary file 1 [file jof-08-01252-s001.zip › jof-2011945_Supplementary material.pdf]

## Supplementary Material

### Supplementary Figures

Figure S1

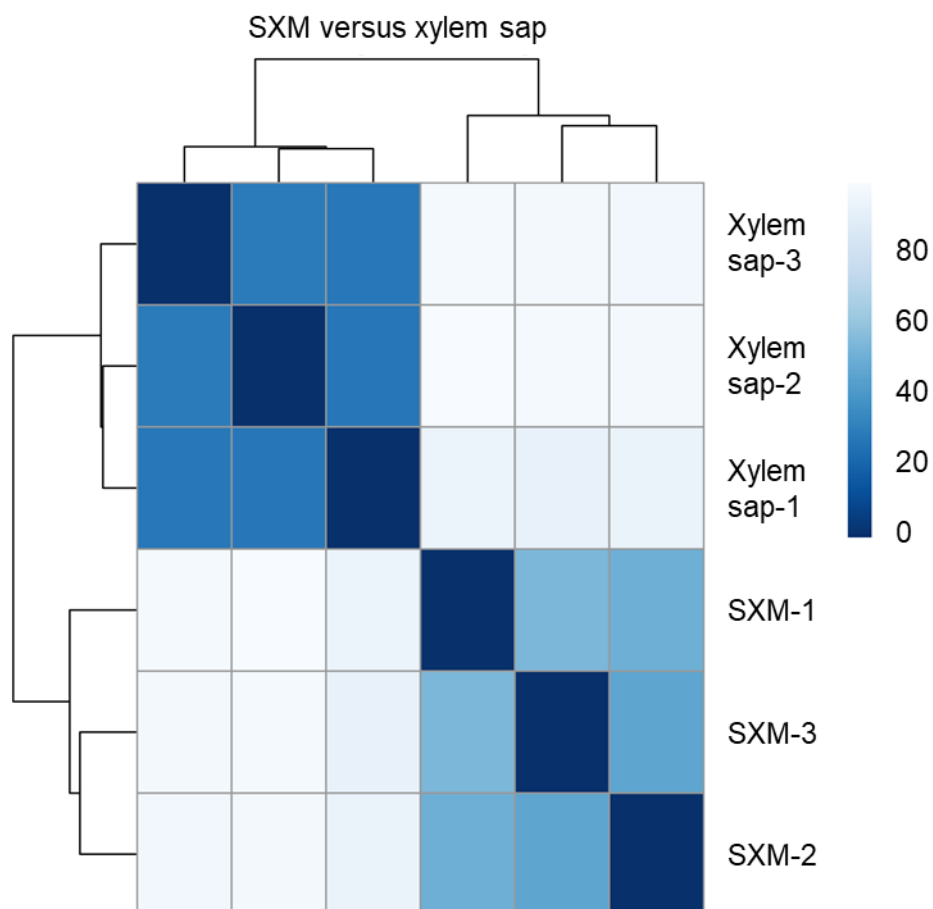

**Figure S1: The similarity of *Verticillium dahliae* JR2 wild-type RNA samples grown in simulated xylem medium (SXM) or extracted tomato xylem sap is greater within than between groups.** Liquid SXM was inoculated with  $5 \times 10^7$  spores and incubated with shaking at 25 °C for five days. Mycelia were then transferred to either SXM or extracted tomato xylem sap and incubated for an additional eight hours. RNA was extracted from the mycelium in three biological replicates per condition and sequenced. Similarities within and between groups were determined based on the expression values of each sample. Shorter sample distances (indicated by darker blue) are measured for more closely related samples. Longer sample distances are represented by lighter blue. The three replicates under the same conditions were each clustered together, while they differed from the samples cultured under other conditions.

**Figure S2**

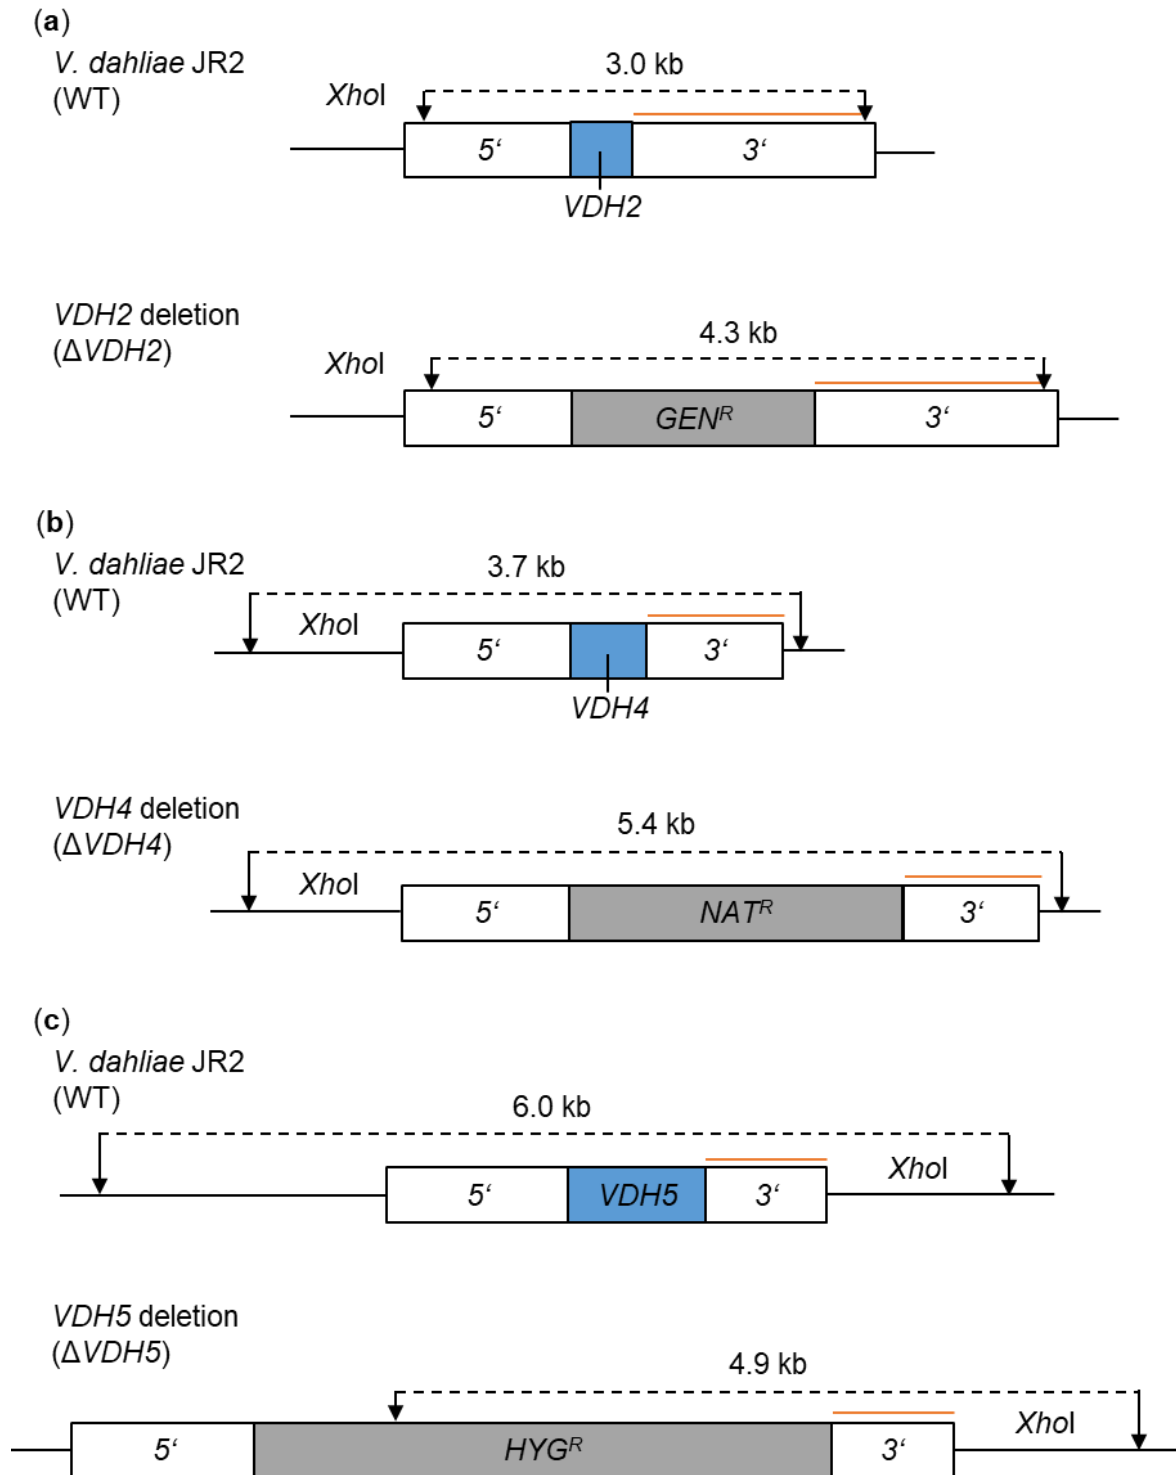

**Figure S2: Scheme of restriction sites used for Southern hybridization of *V. dahliae* (a) VDH2, (b) VDH4, and (c) VDH5 single, double and triple deletion strains.** *V. dahliae* deletion strains of VDH2 ( $\Delta$ VDH2), VDH4 ( $\Delta$ VDH4), and VDH5 ( $\Delta$ VDH5), as well as the corresponding double ( $\Delta$ VDH2/5 and  $\Delta$ VDH4/5) and triple ( $\Delta$ VDH2/4/5) deletion strains were constructed by *Agrobacterium tumefaciens*-mediated transformation. The genomic region is replaced by homologous recombination of the up- and downstream flanking regions against a geneticin ( $GEN^R$ ) resistance marker under control of a *trpC* promoter and terminator, a nourseothricin ( $NAT^R$ ) or a hygromycin B ( $HYG^R$ ) resistance marker under control of a *gpdA*

promoter and a *trpC* terminator. *Xho*I restriction sites are indicated by arrows. The 3' flanking region was used as probe (highlighted in orange), and expected fragment lengths are indicated.

**Figure S3**

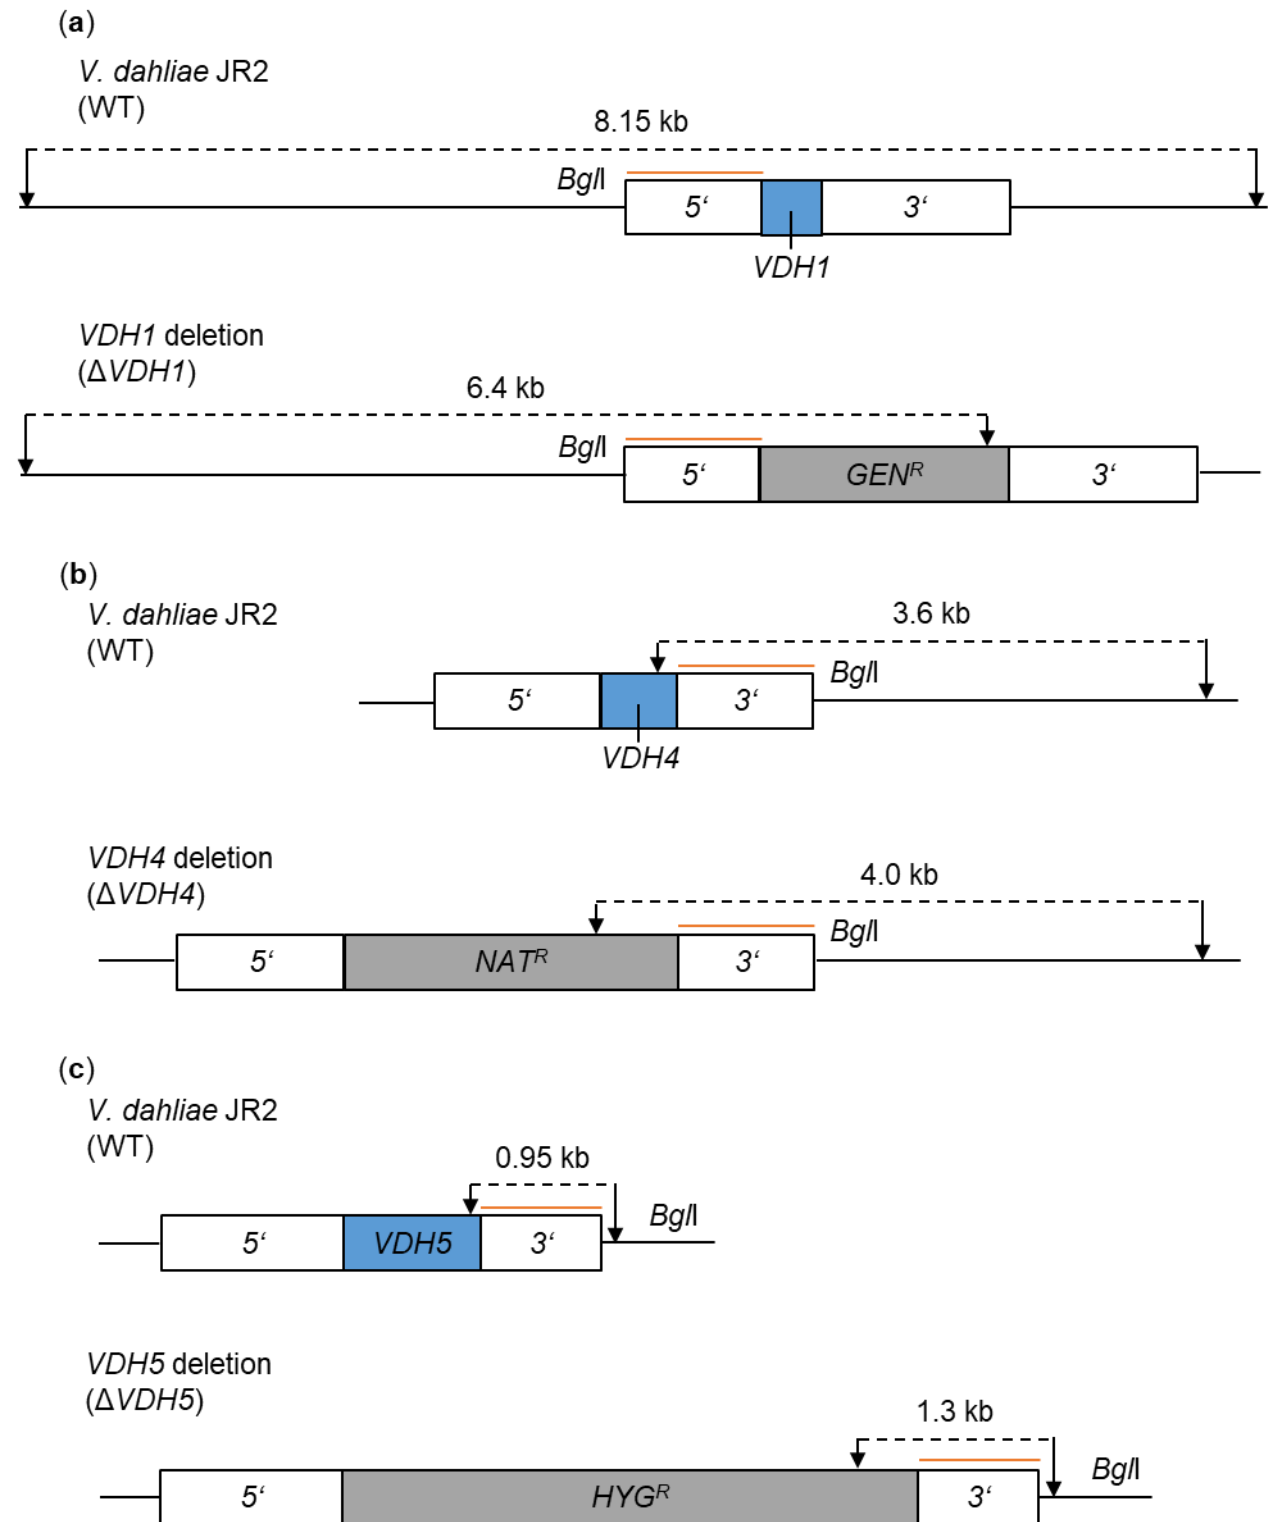

**Figure S3: Scheme of restriction sites used for Southern hybridization of the *V. dahliae* VDH1/4/5 triple deletion strain.** The *V. dahliae* VDH1 ( $\Delta$ VDH1)/VDH4 ( $\Delta$ VDH4)/VDH5 ( $\Delta$ VDH5) triple deletion strain was constructed by *A. tumefaciens*-mediated transformation. The genomic region of each gene is replaced with a resistance marker cassette by homologous recombination of the up- and downstream flanking regions: geneticin ( $GEN^R$ ) for VDH1 (a), nourseothricin ( $NAT^R$ ) for VDH4 (b), and hygromycin B ( $HYG^R$ ) for VDH5 (c). Restriction sites of *Bgl*I are indicated by arrows, and the expected fragment lengths labeled with the 5' flanking

region of *VDH1* or the 3' flanking region of *VDH4* or *VDH5* as probes (indicated in orange) are given.

**Figure S4**

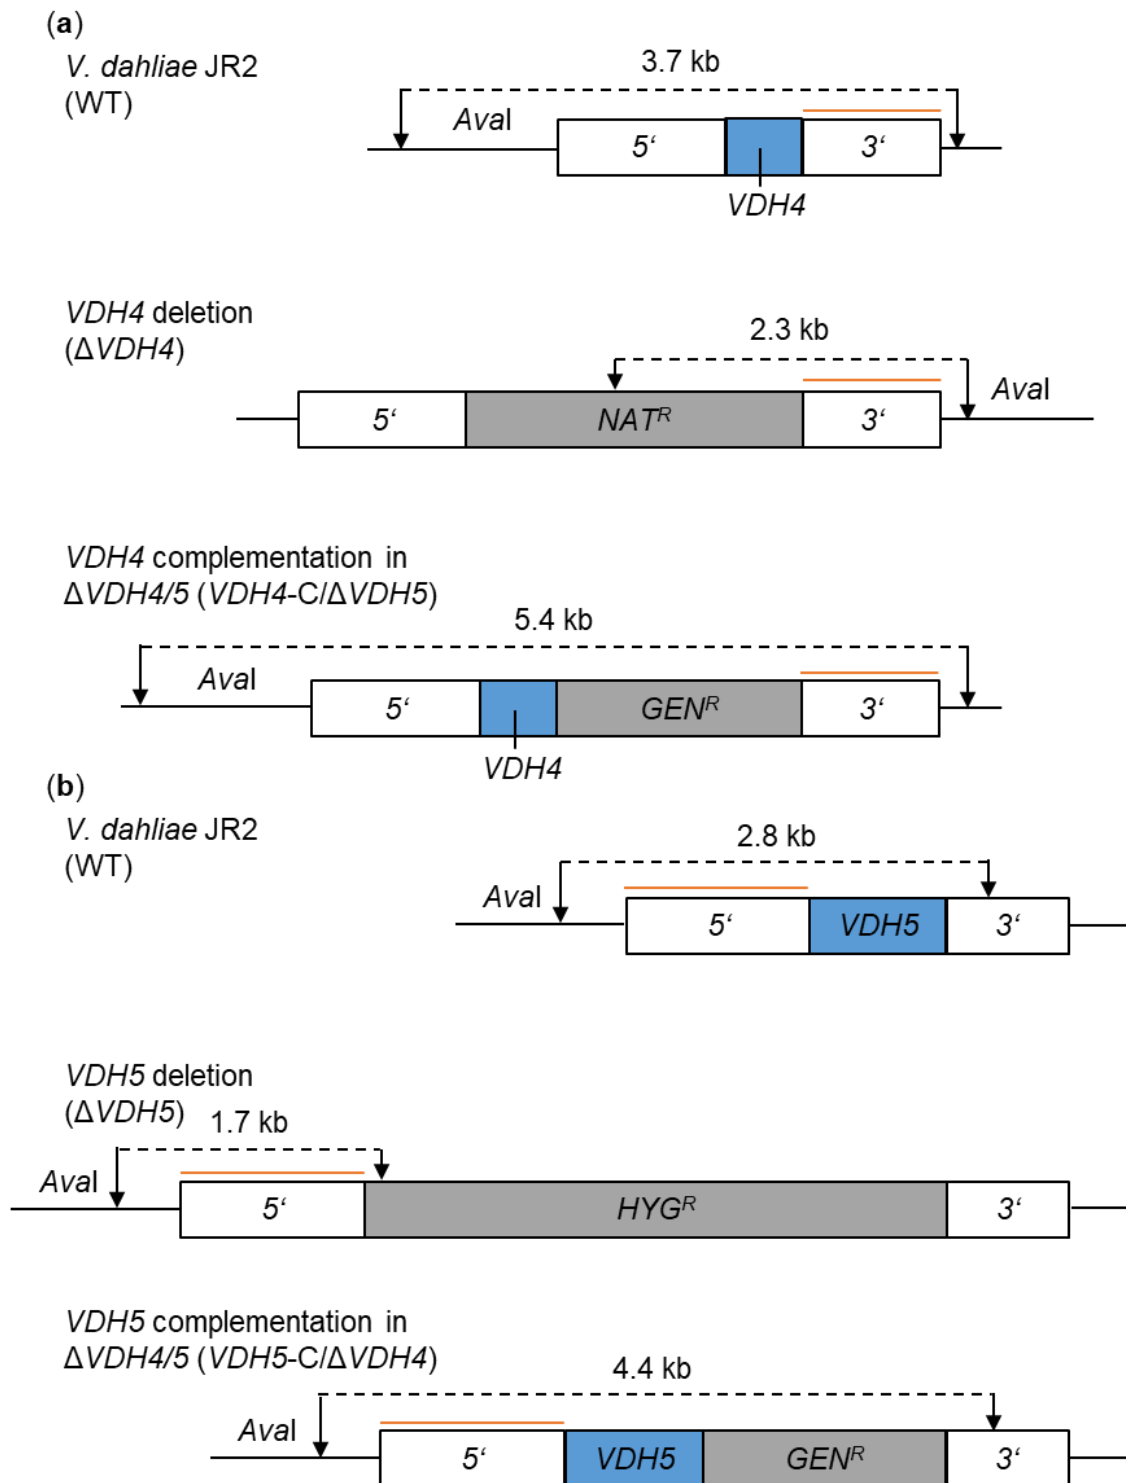

**Figure S4: Scheme of restriction sites used for Southern hybridization of *V. dahliae* (a) *VDH4* and (b) *VDH5* deletion and complementation strains.** The *V. dahliae* *VDH4* ( $\Delta$ VDH4) and *VDH5* ( $\Delta$ VDH5) deletion, and corresponding *VDH4* (VDH4-C/ $\Delta$ VDH5) and *VDH5* (VDH5-C/ $\Delta$ VDH4) complementation strains, were produced by *A. tumefaciens*-mediated transformation. The genomic region is replaced by homologous recombination of the up- and downstream flanking regions against a nourseothricin ( $NAT^R$ ) in the case of *VDH4* or a hygromycin B ( $HYG^R$ ) resistance marker in case of *VDH5* under the control of a *gpdA* promoter and a *trpC* terminator. For complementations, *VDH4* or *VDH5* was reintroduced into the

*VDH4/5* double deletion strain at the genomic locus along with a geneticin (*GEN<sup>R</sup>*) resistance marker under the control of a *trpC* promoter and terminator. *AvaI* restriction sites are indicated by arrows. Given are the expected fragment lengths labeled with the 3' flanking region of *VDH4* or the 5' flanking region of *VDH5* as probes (highlighted in orange).

**Figure S5**

|     |     |     |     |     |     |     |     |     |     |     |     |
|-----|-----|-----|-----|-----|-----|-----|-----|-----|-----|-----|-----|
| 1   | ATG | AAG | TTC | ACC | ACT | GTC | GCC | GTC | GCC | TTC | 30  |
| 31  | TTC | GTC | GGC | CTT | GCC | GCT | GCC | CTC | CCC | ACC | 60  |
| 61  | ACC | GAC | TCC | TAC | ACT | CCT | GCG | CCC | TAC | GGT | 90  |
| 91  | GGC | AAC | GGT | GGA | CAC | AAC | GGA | GGC | CAC | AAC | 120 |
| 121 | GGT | GGT | AAC | AAC | GGA | GGC | CAC | AAC | GGT | GGT | 150 |
| 151 | CAC | AAC | GGC | GGC | AAT | GGT | GGC | AAC | AAT | GGT | 180 |
| 181 | GGC | AAT | GGT | GGT | AAC | GGC | AAC | AAC | GGA | GGC | 210 |
| 211 | AAC | AAC | GGA | GGC | AAC | AAC | GGA | GGC | AAC | AAC | 240 |
| 241 | GGA | GGC | AAC | AAC | GGA | GGC | AAC | AAC | GGA | GGC | 270 |
| 271 | AAC | AAC | GGA | GGC | AAT | GGC | GGT | AAC | AAC | GGC | 300 |
| 301 | GGC | AAT | GGT | GGA | AAC | AAC | GGC | GGA | AAC | GGT | 330 |
| 331 | GGC | AAT | GGA | AAC | AAC | GGT | GGA | AAC | GGA | AAC | 360 |
| 361 | AAC | GGC | GGC | AAT | GGC | GGC | AAC | AAC | GGT | GGT | 390 |
| 391 | AAC | AAC | GGC | GGT | AAC | AAC | GGA | GGC | AAC | GGC | 420 |
| 421 | GGA | AAC | AAC | GGC | GGC | AAT | GGT | GGA | AAC | AAT | 450 |
| 451 | GGC | GGC | AAC | AAC | GGA | GGC | AAC | GGC | GGA | AAC | 480 |
| 481 | AAC | GGT | GGC | AAC | AAC | GGA | GGC | AAC | AAC | GGA | 510 |
| 511 | GGC | AAC | GGC | GGT | AAC | AAC | GAC | TAC | GCG | CCT | 540 |
| 541 | TGC | CCT | TCC | GGC | CTC | AGC | ATG | ACC | CCC | GTC | 570 |
| 571 | TGC | TGC | GCT | ACT | AAC | GTC | CTC | GGC | CTT | CTC | 600 |
| 601 | GCT | CTC | AAC | TGC | GAT | GCT | CCC | AGC | AAG | ACT | 630 |
| 631 | CCC | ACC | TCG | GCC | AAG | GAC | TTC | CAG | AAG | ATC | 660 |
| 661 | TGC | GCC | GAC | GCC | GGC | ACG | GCC | GCC | AAG | TGC | 690 |
| 691 | TGC | ACC | CTC | AAC | CTC | CTC | AAC | CAG | GGT | GTC | 720 |
| 721 | CTG | TGC | CAG | GTT | CCC | GTT | GGC | GTC | GCC | GCC | 750 |
| 751 | TAA |     |     |     |     |     |     |     |     |     | 753 |

**Figure S5: The cDNA sequence of *V. dahliae* JR2 *VDH5*.** The *VDH5* cDNA sequence of 753 bp was obtained by sequencing. For this purpose, RNA was extracted from mycelium of JR2 wild-type grown in liquid simulated xylem medium at 25 °C for five days and then in extracted tomato xylem sap for eight hours. The cDNA was synthesized using the QuantiTect Reverse Transcription Kit (Qiagen). *VDH5* was amplified with primers IM52 and IM53, and fully sequenced.

**Figure S6**

|     |            |            |            |             |     |
|-----|------------|------------|------------|-------------|-----|
| 1   | MKFTTVAVAF | FVGLAAALPT | TDSYTPAPYG | GNGGHNNGGHN | 40  |
| 41  | GGNNGGHNGG | HNGGNGGNNG | GNGGNGNNGG | NNGGNNGGNN  | 80  |
| 81  | GGNNGGNNGG | NNGGNGGNNG | GNGGNGGNNG | GNGNNGGNNG  | 120 |
| 121 | NGGNGGNNGG | NNGGNNGGNG | GNNGGNGGNN | GGNNGGNNGN  | 160 |
| 161 | NGGNNGGNNG | GNGGNNDYAP | CPSGLSMTPV | CCATNVLGLL  | 200 |
| 201 | ALNCDAPSKT | PTSAKDFQKI | CADAGTAAKC | CTLNLLNQGV  | 240 |
| 241 | LCQVPVGVA. |            |            |             | 250 |

**Figure S6: Amino acid sequence of *V. dahliae* JR2 Vdh5.** The sequence was derived from the corrected *VDH5* cDNA sequence obtained by sequencing (Figure S4). The Vdh5 protein consists of 250 amino acids (aa) and contains a predicted N-terminal signal peptide (1-17 aa, in orange), a dense granule Gra6 protein domain (19-142 aa, in gray) and a C-terminal domain of the cerato-ulmin hydrophobin family (180-245 aa, in blue).

**Figure S7**

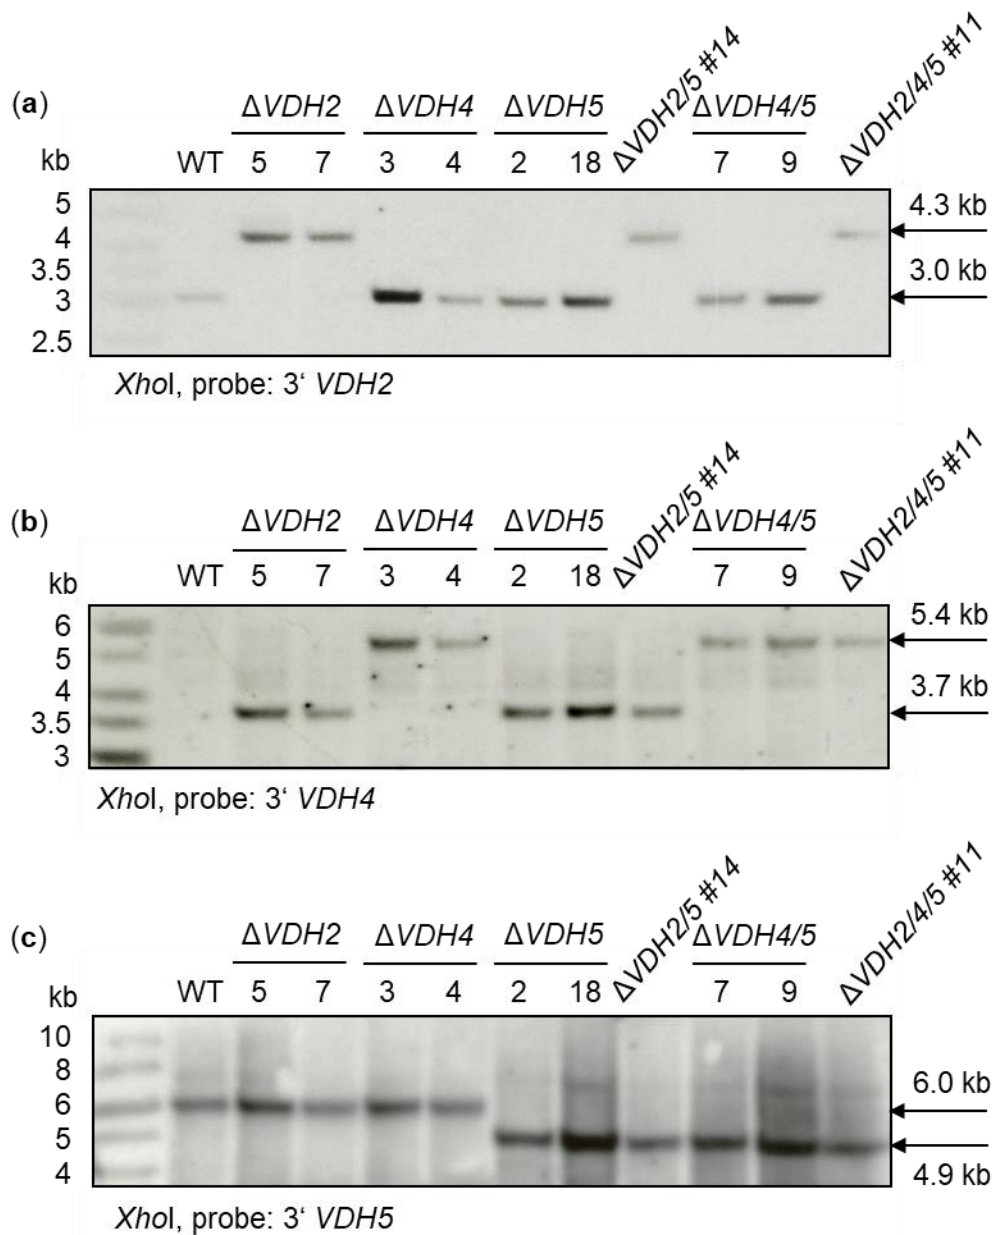

**Figure S7: Verification of *V. dahliae* VDH2, VDH4, and VDH5 single, double and triple deletion strains by Southern hybridization.** The following strains were constructed and confirmed:  $\Delta VDH2$  transformants numbers 5 (VGB648) and 7 (VGB649),  $\Delta VDH4$  transformants numbers 3 (VGB566) and 4 (VGB567),  $\Delta VDH5$  transformants numbers 2 (VGB568) and 18 (VGB569),  $\Delta VDH2/5$  transformant number 14 (VGB651),  $\Delta VDH4/5$  transformants numbers 7 (VGB623) and 9 (VGB624), and  $\Delta VDH2/4/5$  transformant number 11 (VGB657). JR2 wild-type (WT) genomic DNA served as a control. The 3' flanking regions of (a) *VDH2*, (b) *VDH4*, or (c) *VDH5* were used as probes. The restriction enzyme *Xho*I was used to cut the genomic DNA. Signals corresponding to the predicted DNA fragment lengths (see also scheme in Figure S2) were observed in both wild-type and all deletion strains.

**Figure S8**

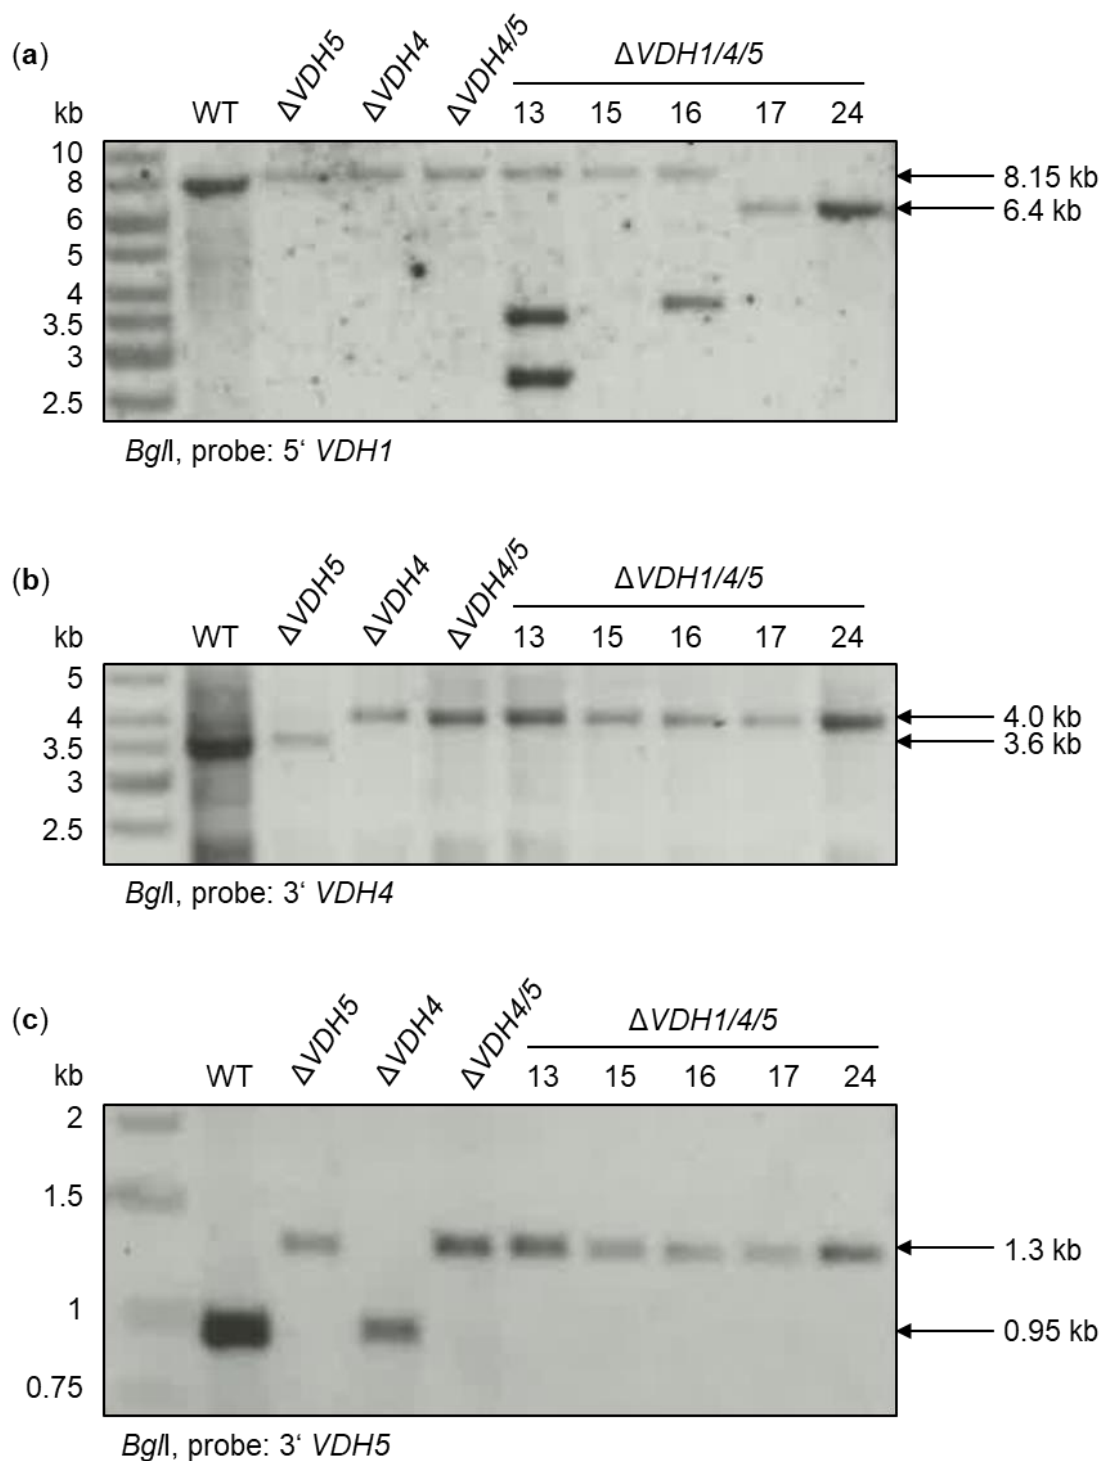

**Figure S8: Verification of the *V. dahliae* VDH1/4/5 triple deletion strain.** Southern hybridization was performed to confirm the constructed  $\Delta$ VDH1/4/5 triple deletion transformants numbers 17 (VGB646) and 24 (VGB647). Genomic DNA from *V. dahliae* JR2 wild-type (WT) and single VDH4 ( $\Delta$ VDH4) and VDH5 ( $\Delta$ VDH) deletion strains, as well as the VDH4/5 double deletion strain ( $\Delta$ VDH4/5), served as controls. The 5' flanking region of (a) VDH1 and the 3' flanking region of (b) VDH4 and (c) VDH5, respectively, were used as probes, and genomic DNA was cut using the restriction enzyme *Bgl*I. Predicted signals corresponding

to DNA fragment length (see also scheme in Figure S3) were observed for both wild-type and all deletion strains.

**Figure S9**

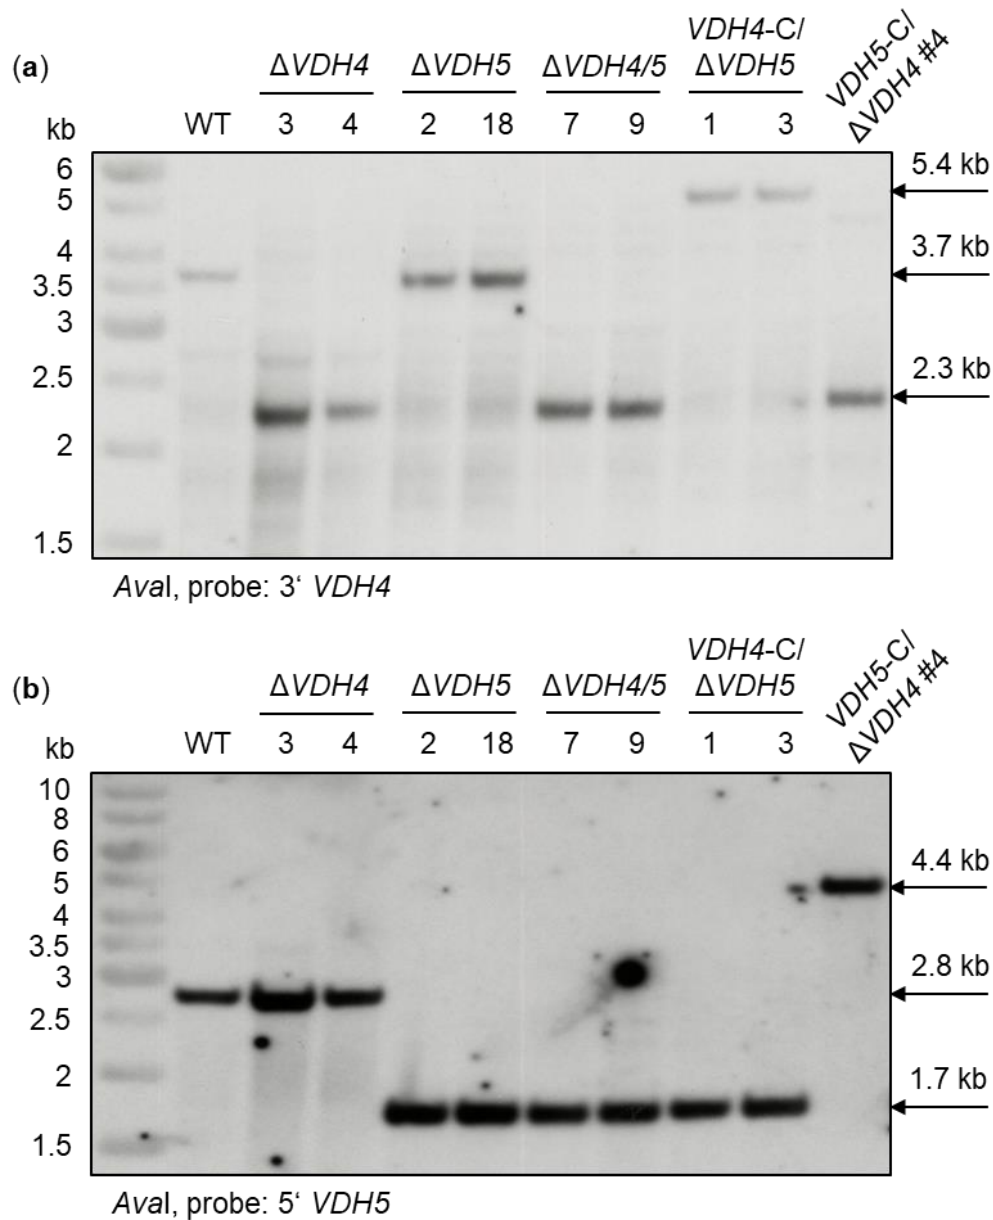

**Figure S9: Verification of *V. dahliae* *VDH4* and *VDH5* deletion and complementation strains by Southern hybridization.** The following strains were constructed and confirmed:  $\Delta VDH4$  transformants numbers 3 (VGB566) and 4 (VGB567),  $\Delta VDH5$  transformants numbers 2 (VGB568) and 18 (VGB569),  $\Delta VDH4/5$  transformants numbers 7 (VGB623) and 9 (VGB624), *VDH4-C*/ $\Delta VDH5$  (in VGB623) transformants numbers 1 (VGB690) and 3 (VGB691), and *VDH5-C*/ $\Delta VDH4$  (in VGB623) transformant number 4 (VGB692). JR2 wild-type (WT) genomic DNA served as a control. The 3' flanking regions of (a) *VDH4* or the 5' flanking region of (b) *VDH5* were used as probes. The restriction enzyme *Aval* was used to cut the genomic DNA. Signals corresponding to the predicted DNA fragment lengths (see also scheme in Figure S4) were observed for the wild-type and all deletion and complementation strains.

**Figure S10**

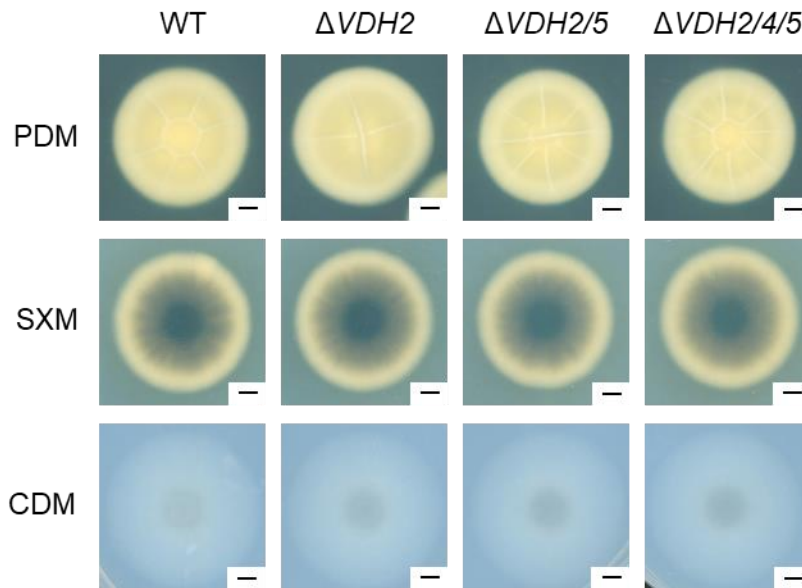

**Figure S10: The presence of the hydrophobin-encoding genes *VDH2*, *VDH4*, and *VDH5* is dispensable for growth and microscerotia production of *V. dahliae*.** Potato dextrose medium (PDM), simulated xylem medium (SXM), and Czapek-Dox medium (CDM) plates were point-inoculated with 50,000 spores of the respective strains and incubated at 25 °C for ten days. Two independent experiments were conducted. Shown are scans from the bottom (scale = 0.5 cm). Vegetative growth and resting structure formation of the *VDH2* single deletion strain ( $\Delta VDH2$ ), as well as the *VDH2/5* double deletion ( $\Delta VDH2/5$ ) and the *VDH2/4/5* triple deletion ( $\Delta VDH2/4/5$ ) strains were compared with the JR2 wild-type (WT) and no differences were observed.

**Figure S11**

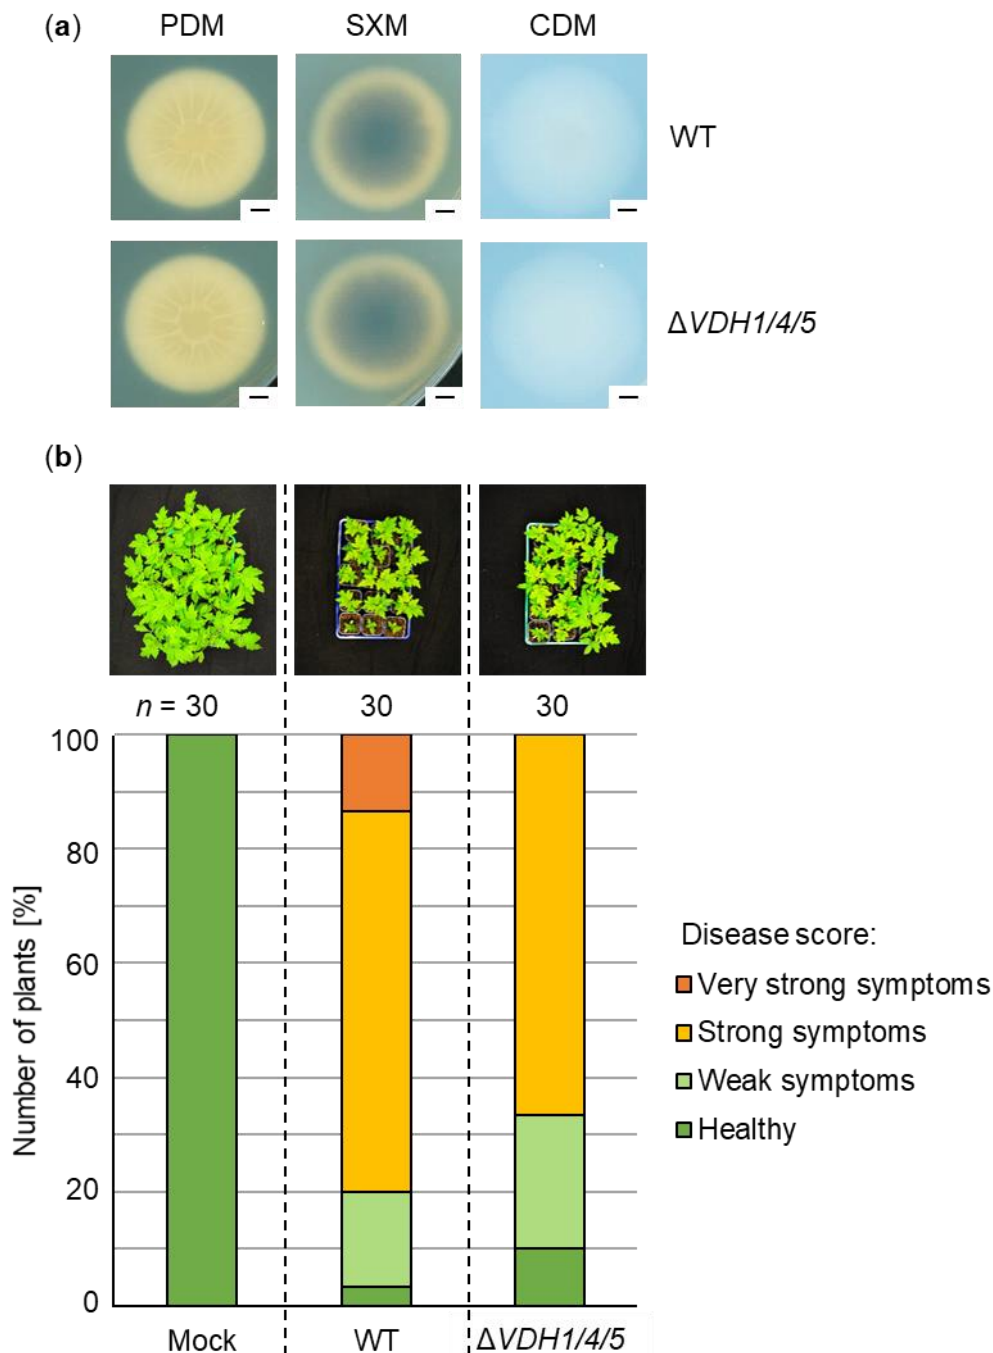

**Figure S11: The presence of the hydrophobin-encoding gene *VDH1* is dispensable for the growth, microsclerotia production, and virulence of *V. dahliae*.** *Ex-planta* and *in-planta* phenotypes of the *VDH1/4/5* triple deletion strain ( $\Delta VDH1/4/5$ ) were compared with the JR2 wild-type (WT). (a) Plates containing potato dextrose medium (PDM), simulated xylem medium (SXM), and Czapek-Dox medium (CDM), respectively, were point-inoculated with 50,000 spores of the indicated strains and incubated at 25 °C for ten days. Scans from the bottom (scale = 0.5 cm) reveal no differences in vegetative growth and resting structure formation between the *VDH1/4/5* triple deletion strain and the wild-type. (b) Tomato seedlings (ten-day-old) were inoculated with spores of the wild-type or the *VDH1/4/5* triple deletion strain via root-dipping. Water-inoculated plants (mock) served as controls. Plants were incubated in a climate chamber at 16 h : 8 h light : dark at 22-25 °C. A general disease score was determined

21 days after inoculation based on plant height, length of longest leaf, and plant weight. The number of plants treated is indicated (*n*) and an overview of plants is shown. Plants infected by the wild-type exhibited stunted growth. In contrast, plants infected by the *VDH1/4/5* triple deletion strain did not show very strong disease symptoms, and about 15% more plants were healthy or only weakly infected.

**Figure S12**

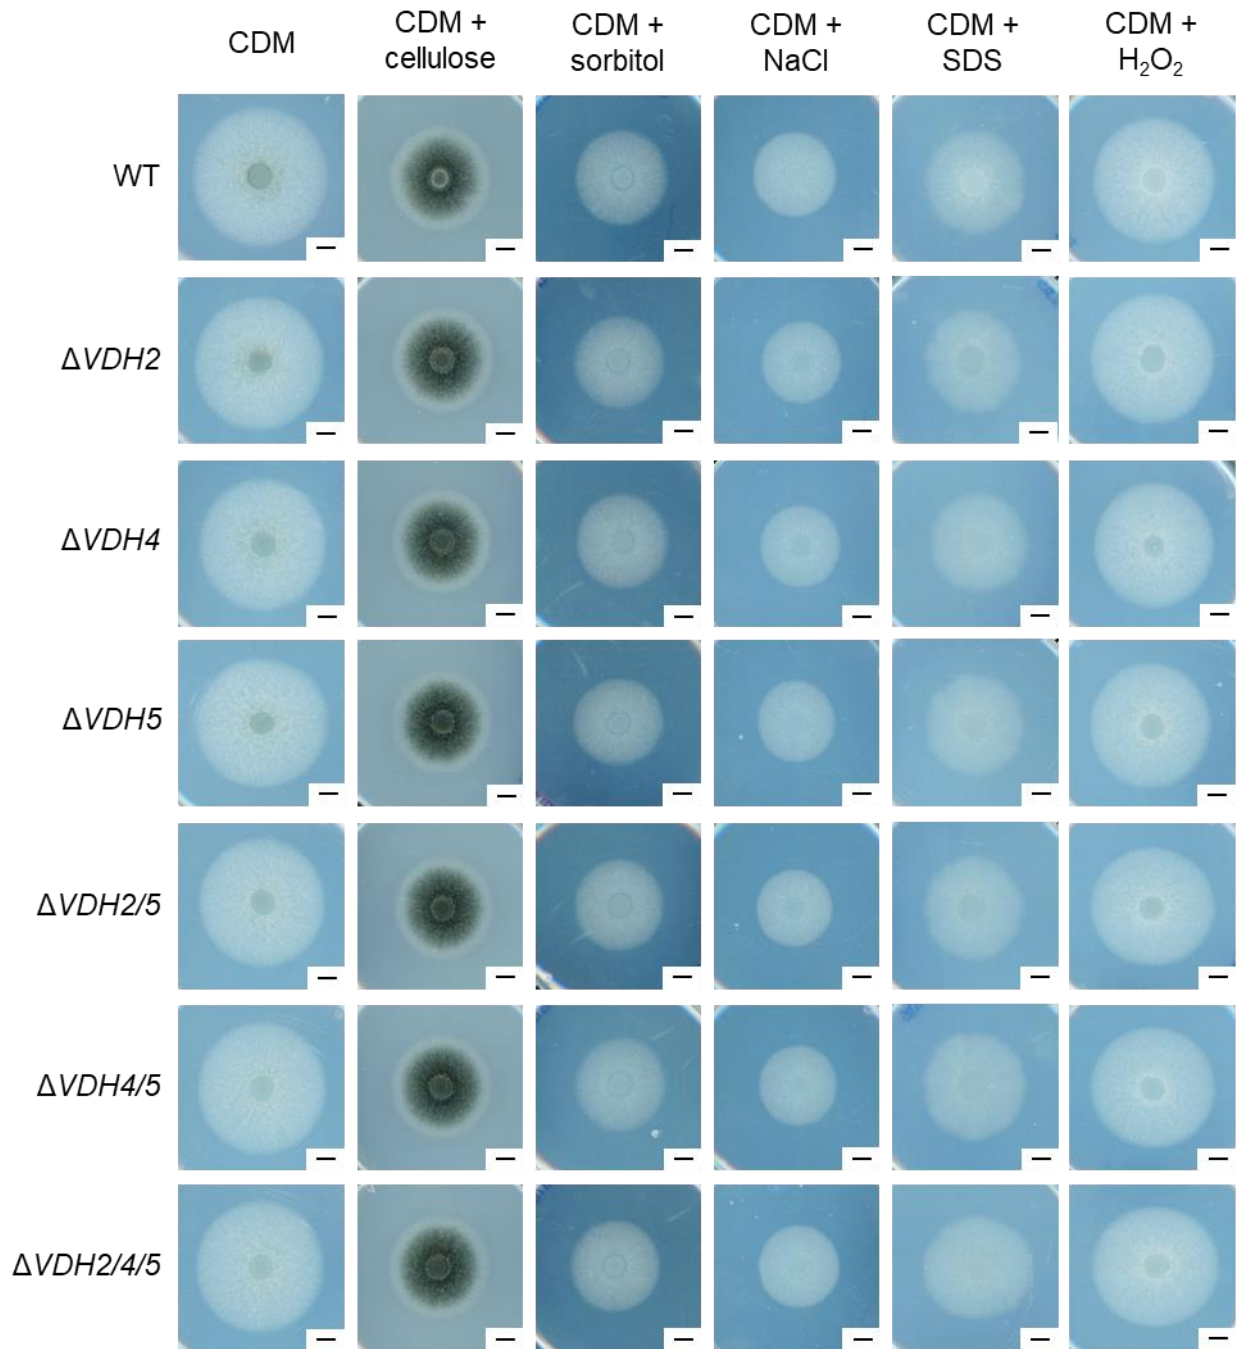

**Figure S12: The absence of hydrophobins in *V. dahliae* leads to wild-type-like growth and microscerotia formation under stress conditions.** Vegetative growth and resting structure formation of *VDH2* ( $\Delta$ *VDH2*), *VDH4* ( $\Delta$ *VDH4*), and *VDH5* ( $\Delta$ *VDH5*) single deletion strains, as well as *VDH2/5* ( $\Delta$ *VDH2/5*) and *VDH4/5* ( $\Delta$ *VDH4/5*) double deletion strains, and the *VDH2/4/5* triple deletion strain ( $\Delta$ *VDH2/4/5*) were compared with JR2 wild-type (WT) on Czapek-Dox medium (CDM) supplemented with different stress-inducing agents. Indicated media plates were point-inoculated with 50,000 spores of the respective strains and incubated at 25 °C for ten days. Two independent experiments were performed. Scans from above depict a similar phenotype of  $\Delta$ *VDH2*,  $\Delta$ *VDH4*,  $\Delta$ *VDH5*,  $\Delta$ *VDH2/5*,  $\Delta$ *VDH4/5*, and  $\Delta$ *VDH2/4/5* compared with wild-type on all media tested (scale = 0.5 cm).

**Figure S13**

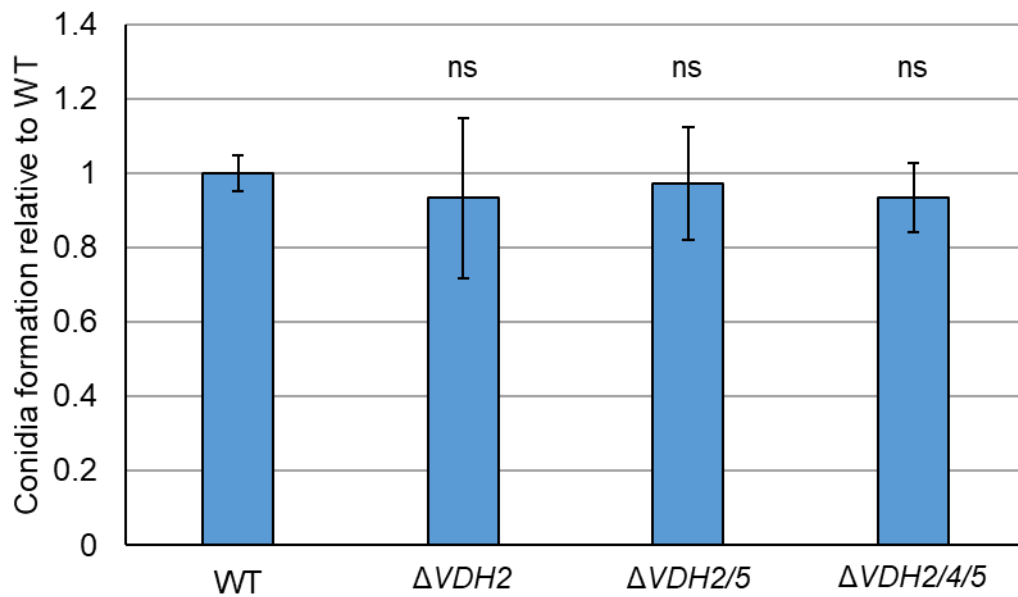

**Figure S13: Wild-type-like conidiospore levels in *V. dahliae* are independent of the presence of *VDH2*, *VDH4*, and *VDH5*.** Liquid simulated xylem medium was inoculated with 4,000 spores per ml and incubated at 25 °C under constant agitation for five days to quantify conidiation. Error bars represent standard deviations of the means, and significant differences from JR2 wild-type (WT) were calculated using Welch's *t*-tests. No difference in the ability to form conidiospores was detected between the *VDH2* single deletion ( $\Delta VDH2$ ), *VDH2/5* double deletion ( $\Delta VDH2/5$ ), *VDH2/4/5* triple deletion ( $\Delta VDH2/4/5$ ) strains, and the wild-type (ns, not significant). The experiment was performed three independent times, each with one or two biological ( $n = 4$  to 6) and four technical replicates.

## Supplementary Tables

**Table S1: List of *V. dahliae* genes induced in tomato xylem sap found in significantly enriched categories by FunCat analysis.**

| Gene identifier      | Protein name                             | FunCat description                          | log <sub>2</sub> (fold change) |
|----------------------|------------------------------------------|---------------------------------------------|--------------------------------|
| VDAG_JR2_Chr1g01070a | Putative uncharacterized protein         | Allantoin and allantoate transport          | 4.75                           |
| VDAG_JR2_Chr1g01710a | Inner membrane transport protein yfaV    | Allantoin and allantoate transport          | 1.52                           |
| VDAG_JR2_Chr1g18850a | Putative uncharacterized protein         | Allantoin and allantoate transport          | 1.14                           |
| VDAG_JR2_Chr1g24150a | Uracil permease                          | Allantoin and allantoate transport          | 4.12                           |
| VDAG_JR2_Chr1g24720a | Allantoate permease                      | Allantoin and allantoate transport          | 1.03                           |
| VDAG_JR2_Chr1g24790a | High-affinity nicotinic acid transporter | Allantoin and allantoate transport          | 2.54                           |
| VDAG_JR2_Chr2g02540a | Pantothenate transporter liz1            | Allantoin and allantoate transport          | 7.40                           |
| VDAG_JR2_Chr2g03860a | Inner membrane transport protein yfaV    | Allantoin and allantoate transport          | 2.02                           |
| VDAG_JR2_Chr2g08730a | Putative uncharacterized protein         | Allantoin and allantoate transport          | 1.43                           |
| VDAG_JR2_Chr2g13170a | Putative uncharacterized protein         | Allantoin and allantoate transport          | 1.08                           |
| VDAG_JR2_Chr4g10900a | Vitamin H transporter                    | Allantoin and allantoate transport          | 3.04                           |
| VDAG_JR2_Chr4g12110a | High-affinity nicotinic acid transporter | Allantoin and allantoate transport          | 1.50                           |
| VDAG_JR2_Chr4g12390a | Putative uncharacterized protein         | Allantoin and allantoate transport          | 8.31                           |
| VDAG_JR2_Chr6g02110a | Thiamine transporter                     | Allantoin and allantoate transport          | 1.23                           |
| VDAG_JR2_Chr6g04250a | Pantothenate transporter liz1            | Allantoin and allantoate transport          | 3.63                           |
| VDAG_JR2_Chr6g09380a | Allantoate permease                      | Allantoin and allantoate transport          | 1.29                           |
| VDAG_JR2_Chr7g03220a | Allantoate permease                      | Allantoin and allantoate transport          | 1.78                           |
| VDAG_JR2_Chr8g01050a | Phthalate transporter                    | Allantoin and allantoate transport          | 1.36                           |
| VDAG_JR2_Chr8g02280a | Vitamin H transporter 1                  | Allantoin and allantoate transport          | 1.44                           |
| VDAG_JR2_Chr8g10350a | Phthalate transporter                    | Allantoin and allantoate transport          | 3.85                           |
| VDAG_JR2_Chr8g11110a | Allantoate permease                      | Allantoin and allantoate transport          | 1.96                           |
| VDAG_JR2_Chr1g05420a | Putative uncharacterized protein         | Amino acid/amino acid derivatives transport | 8.43                           |
| VDAG_JR2_Chr1g10700a | Solute carrier family 12 member 6        | Amino acid/amino acid derivatives transport | 2.26                           |
| VDAG_JR2_Chr1g11700a | Amino acid transporter                   | Amino acid/amino acid derivatives transport | 1.11                           |
| VDAG_JR2_Chr1g12250a | Choline transport protein                | Amino acid/amino acid derivatives transport | 1.50                           |

| Gene identifier      | Protein name                                       | FunCat description                                                                                                            | log <sub>2</sub> (fold change) |
|----------------------|----------------------------------------------------|-------------------------------------------------------------------------------------------------------------------------------|--------------------------------|
| VDAG_JR2_Chr1g25900a | Amino acid transporter                             | Amino acid/amino acid derivatives transport                                                                                   | 1.42                           |
| VDAG_JR2_Chr2g02900a | High-affinity methionine permease                  | Amino acid/amino acid derivatives transport                                                                                   | 1.66                           |
| VDAG_JR2_Chr2g04660a | Lysine-specific permease                           | Amino acid/amino acid derivatives transport                                                                                   | 1.42                           |
| VDAG_JR2_Chr4g04640a | Aromatic and neutral aliphatic amino acid permease | Amino acid/amino acid derivatives transport                                                                                   | 1.06                           |
| VDAG_JR2_Chr4g04720a | Proline-specific permease                          | Amino acid/amino acid derivatives transport                                                                                   | 1.18                           |
| VDAG_JR2_Chr4g10760a | Choline transport protein                          | Amino acid/amino acid derivatives transport                                                                                   | 4.55                           |
| VDAG_JR2_Chr4g11460a | Amino acid transporter                             | Amino acid/amino acid derivatives transport                                                                                   | 1.47                           |
| VDAG_JR2_Chr4g11820a | General amino-acid permease GAP1                   | Amino acid/amino acid derivatives transport                                                                                   | 2.99                           |
| VDAG_JR2_Chr4g12420a | Dicarboxylic amino acid permease                   | Amino acid/amino acid derivatives transport                                                                                   | 2.70                           |
| VDAG_JR2_Chr5g06930a | Choline transport protein                          | Amino acid/amino acid derivatives transport                                                                                   | 4.08                           |
| VDAG_JR2_Chr6g02110a | Thiamine transporter                               | Amino acid/amino acid derivatives transport                                                                                   | 1.23                           |
| VDAG_JR2_Chr6g09120a | Aromatic and neutral aliphatic amino acid permease | Amino acid/amino acid derivatives transport                                                                                   | 1.11                           |
| VDAG_JR2_Chr7g03180a | FMP42 protein                                      | Amino acid/amino acid derivatives transport                                                                                   | 4.22                           |
| VDAG_JR2_Chr7g07610a | Choline transport protein                          | Amino acid/amino acid derivatives transport                                                                                   | 1.12                           |
| VDAG_JR2_Chr7g10310a | Amino-acid permease inda1                          | Amino acid/amino acid derivatives transport                                                                                   | 1.13                           |
| VDAG_JR2_Chr8g01840a | Sugar transporter family protein                   | Amino acid/amino acid derivatives transport                                                                                   | 1.33                           |
| VDAG_JR2_Chr8g09210a | Carboxylic acid transport protein                  | Amino acid/amino acid derivatives transport                                                                                   | 7.57                           |
| VDAG_JR2_Chr1g00640a | Putative uncharacterized protein                   | Cation transport (H <sup>+</sup> , Na <sup>+</sup> , K <sup>+</sup> , Ca <sup>2+</sup> , NH <sub>4</sub> <sup>+</sup> , etc.) | 1.08                           |
| VDAG_JR2_Chr1g02230a | Putative uncharacterized protein                   | Cation transport (H <sup>+</sup> , Na <sup>+</sup> , K <sup>+</sup> , Ca <sup>2+</sup> , NH <sub>4</sub> <sup>+</sup> , etc.) | 1.27                           |
| VDAG_JR2_Chr1g02790a | Calcium-transporting ATPase                        | Cation transport (H <sup>+</sup> , Na <sup>+</sup> , K <sup>+</sup> , Ca <sup>2+</sup> , NH <sub>4</sub> <sup>+</sup> , etc.) | 1.45                           |
| VDAG_JR2_Chr1g10700a | Solute carrier family 12 member 6                  | Cation transport (H <sup>+</sup> , Na <sup>+</sup> , K <sup>+</sup> , Ca <sup>2+</sup> , NH <sub>4</sub> <sup>+</sup> , etc.) | 2.26                           |
| VDAG_JR2_Chr1g15800a | Cobalt uptake protein COT1                         | Cation transport (H <sup>+</sup> , Na <sup>+</sup> , K <sup>+</sup> , Ca <sup>2+</sup> , NH <sub>4</sub> <sup>+</sup> , etc.) | 2.19                           |
| VDAG_JR2_Chr1g15850a | ABC transporter CDR4                               | Cation transport (H <sup>+</sup> , Na <sup>+</sup> , K <sup>+</sup> , Ca <sup>2+</sup> , NH <sub>4</sub> <sup>+</sup> , etc.) | 1.22                           |
| VDAG_JR2_Chr1g18920a | Putative uncharacterized protein                   | Cation transport (H <sup>+</sup> , Na <sup>+</sup> , K <sup>+</sup> , Ca <sup>2+</sup> , NH <sub>4</sub> <sup>+</sup> , etc.) | 1.06                           |
| VDAG_JR2_Chr1g22590a | Vacuolar calcium ion transporter                   | Cation transport (H <sup>+</sup> , Na <sup>+</sup> , K <sup>+</sup> , Ca <sup>2+</sup> , NH <sub>4</sub> <sup>+</sup> , etc.) | 3.81                           |
| VDAG_JR2_Chr1g23670a | Putative uncharacterized protein                   | Cation transport (H <sup>+</sup> , Na <sup>+</sup> , K <sup>+</sup> , Ca <sup>2+</sup> , NH <sub>4</sub> <sup>+</sup> , etc.) | 1.76                           |
| VDAG_JR2_Chr1g25420a | Urea active transporter                            | Cation transport (H <sup>+</sup> , Na <sup>+</sup> , K <sup>+</sup> , Ca <sup>2+</sup> , NH <sub>4</sub> <sup>+</sup> , etc.) | 1.17                           |

| Gene identifier             | Protein name                                     | FunCat description                                                                                                            | log <sub>2</sub> (fold change) |
|-----------------------------|--------------------------------------------------|-------------------------------------------------------------------------------------------------------------------------------|--------------------------------|
| <i>VDAG_JR2_Chr1g26890a</i> | Pleiotropic ABC multiple drug efflux transporter | Cation transport (H <sup>+</sup> , Na <sup>+</sup> , K <sup>+</sup> , Ca <sup>2+</sup> , NH <sub>4</sub> <sup>+</sup> , etc.) | 1.07                           |
| <i>VDAG_JR2_Chr1g27550a</i> | Urea active transporter                          | Cation transport (H <sup>+</sup> , Na <sup>+</sup> , K <sup>+</sup> , Ca <sup>2+</sup> , NH <sub>4</sub> <sup>+</sup> , etc.) | 2.12                           |
| <i>VDAG_JR2_Chr1g29160a</i> | Calcium-transporting ATPase                      | Cation transport (H <sup>+</sup> , Na <sup>+</sup> , K <sup>+</sup> , Ca <sup>2+</sup> , NH <sub>4</sub> <sup>+</sup> , etc.) | 1.22                           |
| <i>VDAG_JR2_Chr2g07940a</i> | Phospholipid-transporting ATPase                 | Cation transport (H <sup>+</sup> , Na <sup>+</sup> , K <sup>+</sup> , Ca <sup>2+</sup> , NH <sub>4</sub> <sup>+</sup> , etc.) | 1.15                           |
| <i>VDAG_JR2_Chr2g12640a</i> | Putative uncharacterized protein                 | Cation transport (H <sup>+</sup> , Na <sup>+</sup> , K <sup>+</sup> , Ca <sup>2+</sup> , NH <sub>4</sub> <sup>+</sup> , etc.) | 1.14                           |
| <i>VDAG_JR2_Chr2g13190a</i> | Voltage-gated potassium channel subunit beta-3   | Cation transport (H <sup>+</sup> , Na <sup>+</sup> , K <sup>+</sup> , Ca <sup>2+</sup> , NH <sub>4</sub> <sup>+</sup> , etc.) | 1.20                           |
| <i>VDAG_JR2_Chr3g05190a</i> | Sodium/calcium exchanger protein                 | Cation transport (H <sup>+</sup> , Na <sup>+</sup> , K <sup>+</sup> , Ca <sup>2+</sup> , NH <sub>4</sub> <sup>+</sup> , etc.) | 1.17                           |
| <i>VDAG_JR2_Chr3g11010a</i> | Vacuolar ATP synthase 98 kDa subunit             | Cation transport (H <sup>+</sup> , Na <sup>+</sup> , K <sup>+</sup> , Ca <sup>2+</sup> , NH <sub>4</sub> <sup>+</sup> , etc.) | 2.69                           |
| <i>VDAG_JR2_Chr3g11520a</i> | Potassium channel                                | Cation transport (H <sup>+</sup> , Na <sup>+</sup> , K <sup>+</sup> , Ca <sup>2+</sup> , NH <sub>4</sub> <sup>+</sup> , etc.) | 1.06                           |
| <i>VDAG_JR2_Chr4g04200a</i> | Calcium permease                                 | Cation transport (H <sup>+</sup> , Na <sup>+</sup> , K <sup>+</sup> , Ca <sup>2+</sup> , NH <sub>4</sub> <sup>+</sup> , etc.) | 1.15                           |
| <i>VDAG_JR2_Chr4g07840a</i> | Potassium transporter 1                          | Cation transport (H <sup>+</sup> , Na <sup>+</sup> , K <sup>+</sup> , Ca <sup>2+</sup> , NH <sub>4</sub> <sup>+</sup> , etc.) | 1.47                           |
| <i>VDAG_JR2_Chr4g12160a</i> | Ammonium transporter 1                           | Cation transport (H <sup>+</sup> , Na <sup>+</sup> , K <sup>+</sup> , Ca <sup>2+</sup> , NH <sub>4</sub> <sup>+</sup> , etc.) | 2.22                           |
| <i>VDAG_JR2_Chr5g01900a</i> | High-affinity potassium transport protein        | Cation transport (H <sup>+</sup> , Na <sup>+</sup> , K <sup>+</sup> , Ca <sup>2+</sup> , NH <sub>4</sub> <sup>+</sup> , etc.) | 3.47                           |
| <i>VDAG_JR2_Chr5g01910a</i> | Na <sup>+</sup> /H <sup>+</sup> antiporter       | Cation transport (H <sup>+</sup> , Na <sup>+</sup> , K <sup>+</sup> , Ca <sup>2+</sup> , NH <sub>4</sub> <sup>+</sup> , etc.) | 2.53                           |
| <i>VDAG_JR2_Chr5g05790a</i> | Membrane transporter                             | Cation transport (H <sup>+</sup> , Na <sup>+</sup> , K <sup>+</sup> , Ca <sup>2+</sup> , NH <sub>4</sub> <sup>+</sup> , etc.) | 1.24                           |
| <i>VDAG_JR2_Chr5g10400a</i> | Calcium-channel protein cch1                     | Cation transport (H <sup>+</sup> , Na <sup>+</sup> , K <sup>+</sup> , Ca <sup>2+</sup> , NH <sub>4</sub> <sup>+</sup> , etc.) | 1.30                           |
| <i>VDAG_JR2_Chr5g12230a</i> | Na <sup>+</sup> /H <sup>+</sup> antiporter       | Cation transport (H <sup>+</sup> , Na <sup>+</sup> , K <sup>+</sup> , Ca <sup>2+</sup> , NH <sub>4</sub> <sup>+</sup> , etc.) | 1.49                           |
| <i>VDAG_JR2_Chr6g01260a</i> | Pantothenate transporter liz1                    | Cation transport (H <sup>+</sup> , Na <sup>+</sup> , K <sup>+</sup> , Ca <sup>2+</sup> , NH <sub>4</sub> <sup>+</sup> , etc.) | 2.12                           |
| <i>VDAG_JR2_Chr6g03600a</i> | Low-affinity potassium transport protein         | Cation transport (H <sup>+</sup> , Na <sup>+</sup> , K <sup>+</sup> , Ca <sup>2+</sup> , NH <sub>4</sub> <sup>+</sup> , etc.) | 1.13                           |
| <i>VDAG_JR2_Chr6g06420a</i> | Multidrug resistance protein CDR2                | Cation transport (H <sup>+</sup> , Na <sup>+</sup> , K <sup>+</sup> , Ca <sup>2+</sup> , NH <sub>4</sub> <sup>+</sup> , etc.) | 1.11                           |
| <i>VDAG_JR2_Chr6g07230a</i> | Myb-like DNA-binding protein                     | Cation transport (H <sup>+</sup> , Na <sup>+</sup> , K <sup>+</sup> , Ca <sup>2+</sup> , NH <sub>4</sub> <sup>+</sup> , etc.) | 1.71                           |
| <i>VDAG_JR2_Chr6g09800a</i> | K <sup>+</sup> /H <sup>+</sup> antiporter 1      | Cation transport (H <sup>+</sup> , Na <sup>+</sup> , K <sup>+</sup> , Ca <sup>2+</sup> , NH <sub>4</sub> <sup>+</sup> , etc.) | 2.20                           |
| <i>VDAG_JR2_Chr7g02750a</i> | Low-affinity potassium transport protein         | Cation transport (H <sup>+</sup> , Na <sup>+</sup> , K <sup>+</sup> , Ca <sup>2+</sup> , NH <sub>4</sub> <sup>+</sup> , etc.) | 1.50                           |
| <i>VDAG_JR2_Chr7g10440a</i> | Sodium/nucleoside cotransporter                  | Cation transport (H <sup>+</sup> , Na <sup>+</sup> , K <sup>+</sup> , Ca <sup>2+</sup> , NH <sub>4</sub> <sup>+</sup> , etc.) | 1.21                           |
| <i>VDAG_JR2_Chr8g06660a</i> | Ammonium transporter MEP1                        | Cation transport (H <sup>+</sup> , Na <sup>+</sup> , K <sup>+</sup> , Ca <sup>2+</sup> , NH <sub>4</sub> <sup>+</sup> , etc.) | 1.29                           |
| <i>VDAG_JR2_Chr8g09670a</i> | ATP synthase subunit alpha                       | Cation transport (H <sup>+</sup> , Na <sup>+</sup> , K <sup>+</sup> , Ca <sup>2+</sup> , NH <sub>4</sub> <sup>+</sup> , etc.) | 2.64                           |
| <i>VDAG_JR2_Chr1g01080a</i> | Maltose permease                                 | C-compound and carbohydrate metabolism                                                                                        | 2.77                           |

| Gene identifier      | Protein name                                                         | FunCat description                     | log <sub>2</sub> (fold change) |
|----------------------|----------------------------------------------------------------------|----------------------------------------|--------------------------------|
| VDAG_JR2_Chr1g02220a | Sugar transporter                                                    | C-compound and carbohydrate metabolism | 2.06                           |
| VDAG_JR2_Chr1g04070a | Estradiol 17-beta-dehydrogenase                                      | C-compound and carbohydrate metabolism | 1.49                           |
| VDAG_JR2_Chr1g05040a | Putative uncharacterized protein                                     | C-compound and carbohydrate metabolism | 1.48                           |
| VDAG_JR2_Chr1g05250a | NADP-dependent mannitol dehydrogenase                                | C-compound and carbohydrate metabolism | 1.10                           |
| VDAG_JR2_Chr1g05370a | Rhamnolipids biosynthesis 3-oxoacyl-[acyl-carrier-protein] reductase | C-compound and carbohydrate metabolism | 2.07                           |
| VDAG_JR2_Chr1g05390a | Aldehyde dehydrogenase                                               | C-compound and carbohydrate metabolism | 4.23                           |
| VDAG_JR2_Chr1g05500a | 3-oxoacyl-[acyl-carrier-protein] reductase                           | C-compound and carbohydrate metabolism | 1.17                           |
| VDAG_JR2_Chr1g05760a | Galactose-proton symporter                                           | C-compound and carbohydrate metabolism | 1.70                           |
| VDAG_JR2_Chr1g06300a | Oxidoreductase 2-nitropropane dioxygenase family                     | C-compound and carbohydrate metabolism | 1.02                           |
| VDAG_JR2_Chr1g06670a | Alkaline phosphatase H                                               | C-compound and carbohydrate metabolism | 2.68                           |
| VDAG_JR2_Chr1g08876a | FAD binding domain-containing protein                                | C-compound and carbohydrate metabolism | 1.12                           |
| VDAG_JR2_Chr1g13450a | 4-coumarate-CoA ligase                                               | C-compound and carbohydrate metabolism | 1.26                           |
| VDAG_JR2_Chr1g15180a | Isocitrate lyase                                                     | C-compound and carbohydrate metabolism | 1.33                           |
| VDAG_JR2_Chr1g15790a | Versicolorin reductase                                               | C-compound and carbohydrate metabolism | 1.03                           |
| VDAG_JR2_Chr1g15970a | Amine oxidase                                                        | C-compound and carbohydrate metabolism | 1.07                           |
| VDAG_JR2_Chr1g17290a | Alpha-galactosidase (EC 3.2.1.22) (Melibiase)                        | C-compound and carbohydrate metabolism | 1.10                           |
| VDAG_JR2_Chr1g18220a | Pisatin demethylase                                                  | C-compound and carbohydrate metabolism | 1.58                           |
| VDAG_JR2_Chr1g18710a | Glucosamine 6-phosphate N-acetyltransferase                          | C-compound and carbohydrate metabolism | 1.02                           |
| VDAG_JR2_Chr1g19160a | Tyrosyl-DNA phosphodiesterase                                        | C-compound and carbohydrate metabolism | 1.03                           |
| VDAG_JR2_Chr1g20150a | Oxidoreductase 2-nitropropane dioxygenase family                     | C-compound and carbohydrate metabolism | 1.04                           |
| VDAG_JR2_Chr1g20550a | Neuroigin-4                                                          | C-compound and carbohydrate metabolism | 1.75                           |
| VDAG_JR2_Chr1g21570a | Beta-galactosidase (EC 3.2.1.23)                                     | C-compound and carbohydrate metabolism | 1.68                           |
| VDAG_JR2_Chr1g21690a | Peroxisomal (S)-2-hydroxy-acid oxidase                               | C-compound and carbohydrate metabolism | 4.12                           |

| Gene identifier      | Protein name                                                                             | FunCat description                     | log <sub>2</sub> (fold change) |
|----------------------|------------------------------------------------------------------------------------------|----------------------------------------|--------------------------------|
| VDAG_JR2_Chr1g22650a | D-arabinono-1,4-lactone oxidase                                                          | C-compound and carbohydrate metabolism | 1.84                           |
| VDAG_JR2_Chr1g23240a | Mixed-linked glucanase                                                                   | C-compound and carbohydrate metabolism | 1.88                           |
| VDAG_JR2_Chr1g23860a | Putative uncharacterized protein                                                         | C-compound and carbohydrate metabolism | 2.55                           |
| VDAG_JR2_Chr1g24130a | Polygalacturonase                                                                        | C-compound and carbohydrate metabolism | 1.98                           |
| VDAG_JR2_Chr1g24570a | Pristinamycin IIA synthase subunit A                                                     | C-compound and carbohydrate metabolism | 3.01                           |
| VDAG_JR2_Chr1g26170a | Putative uncharacterized protein                                                         | C-compound and carbohydrate metabolism | 1.22                           |
| VDAG_JR2_Chr1g26510a | Cholinesterase                                                                           | C-compound and carbohydrate metabolism | 2.46                           |
| VDAG_JR2_Chr1g26770a | Sorbitol dehydrogenase                                                                   | C-compound and carbohydrate metabolism | 2.27                           |
| VDAG_JR2_Chr1g27050a | Ubiquinone/menaquinone biosynthesis methyltransferase ubiE                               | C-compound and carbohydrate metabolism | 2.93                           |
| VDAG_JR2_Chr1g28200a | Putative uncharacterized protein                                                         | C-compound and carbohydrate metabolism | 1.29                           |
| VDAG_JR2_Chr1g28650a | 3-hydroxyisobutyrate dehydrogenase                                                       | C-compound and carbohydrate metabolism | 1.13                           |
| VDAG_JR2_Chr1g28970a | Alpha-galactosidase (EC 3.2.1.22) (Melibiase)                                            | C-compound and carbohydrate metabolism | 2.20                           |
| VDAG_JR2_Chr2g00430a | Pectate lyase                                                                            | C-compound and carbohydrate metabolism | 2.89                           |
| VDAG_JR2_Chr2g01760a | Putative uncharacterized protein                                                         | C-compound and carbohydrate metabolism | 1.44                           |
| VDAG_JR2_Chr2g03770a | 6-phosphogluconate dehydrogenase, decarboxylating (EC 1.1.1.44)                          | C-compound and carbohydrate metabolism | 1.23                           |
| VDAG_JR2_Chr2g04160a | 4-coumarate-CoA ligase                                                                   | C-compound and carbohydrate metabolism | 2.58                           |
| VDAG_JR2_Chr2g05040a | 3-alpha-(Or 20-beta)-hydroxysteroid dehydrogenase                                        | C-compound and carbohydrate metabolism | 1.25                           |
| VDAG_JR2_Chr2g05680a | Putative uncharacterized protein                                                         | C-compound and carbohydrate metabolism | 1.17                           |
| VDAG_JR2_Chr2g05870a | Glucosylase (EC 3.2.1.3) (1,4-alpha-D-glucan glucosylase) (Glucan 1,4-alpha-glucosidase) | C-compound and carbohydrate metabolism | 1.49                           |
| VDAG_JR2_Chr2g06830a | Xylosidase/arabinosidase                                                                 | C-compound and carbohydrate metabolism | 1.04                           |
| VDAG_JR2_Chr2g08750a | FAD/FMN-containing dehydrogenase                                                         | C-compound and carbohydrate metabolism | 2.33                           |
| VDAG_JR2_Chr2g08810a | Endoglucanase                                                                            | C-compound and carbohydrate metabolism | 1.60                           |
| VDAG_JR2_Chr2g08880a | Maltose permease MAL31                                                                   | C-compound and carbohydrate metabolism | 1.34                           |

| Gene identifier      | Protein name                                      | FunCat description                     | log <sub>2</sub> (fold change) |
|----------------------|---------------------------------------------------|----------------------------------------|--------------------------------|
| VDAG_JR2_Chr2g11080a | 3-alpha-(Or 20-beta)-hydroxysteroid dehydrogenase | C-compound and carbohydrate metabolism | 1.34                           |
| VDAG_JR2_Chr2g12320a | General alpha-glucoside permease                  | C-compound and carbohydrate metabolism | 1.43                           |
| VDAG_JR2_Chr2g12790a | FAD binding domain-containing protein             | C-compound and carbohydrate metabolism | 2.69                           |
| VDAG_JR2_Chr2g13240a | Choline dehydrogenase                             | C-compound and carbohydrate metabolism | 4.55                           |
| VDAG_JR2_Chr2g13290a | Pectate lyase D                                   | C-compound and carbohydrate metabolism | 1.97                           |
| VDAG_JR2_Chr3g01050a | Membrane transporter D1                           | C-compound and carbohydrate metabolism | 1.34                           |
| VDAG_JR2_Chr3g02150a | Chitinase                                         | C-compound and carbohydrate metabolism | 1.17                           |
| VDAG_JR2_Chr3g02970a | Mixed-linked glucanase                            | C-compound and carbohydrate metabolism | 1.93                           |
| VDAG_JR2_Chr3g03180a | Oligo-1,6-glucosidase                             | C-compound and carbohydrate metabolism | 1.19                           |
| VDAG_JR2_Chr3g03230a | 4-coumarate-CoA ligase                            | C-compound and carbohydrate metabolism | 1.49                           |
| VDAG_JR2_Chr3g03460a | Alpha-mannosidase                                 | C-compound and carbohydrate metabolism | 1.12                           |
| VDAG_JR2_Chr3g03540a | Putative uncharacterized protein                  | C-compound and carbohydrate metabolism | 1.02                           |
| VDAG_JR2_Chr3g06580a | cAMP-regulated D2 protein                         | C-compound and carbohydrate metabolism | 1.50                           |
| VDAG_JR2_Chr3g07650a | Acetate kinase                                    | C-compound and carbohydrate metabolism | 1.13                           |
| VDAG_JR2_Chr3g09290a | D-3-phosphoglycerate dehydrogenase                | C-compound and carbohydrate metabolism | 1.70                           |
| VDAG_JR2_Chr3g10320a | Beta-hexosaminidase                               | C-compound and carbohydrate metabolism | 1.47                           |
| VDAG_JR2_Chr3g10330a | N-acetylglucosamine-6-phosphate deacetylase       | C-compound and carbohydrate metabolism | 1.43                           |
| VDAG_JR2_Chr3g10350a | Glucosamine-6-phosphate isomerase                 | C-compound and carbohydrate metabolism | 2.27                           |
| VDAG_JR2_Chr3g10360a | Hexokinase-1                                      | C-compound and carbohydrate metabolism | 1.49                           |
| VDAG_JR2_Chr3g10580a | Glycosyl hydrolases family 32 superfamily         | C-compound and carbohydrate metabolism | 2.43                           |
| VDAG_JR2_Chr3g10590a | General alpha-glucoside permease                  | C-compound and carbohydrate metabolism | 1.66                           |
| VDAG_JR2_Chr3g10840a | Short-chain dehydrogenase/reductase SDR           | C-compound and carbohydrate metabolism | 1.19                           |
| VDAG_JR2_Chr3g11080a | Endo-1,4-beta-xylanase                            | C-compound and carbohydrate metabolism | 1.36                           |
| VDAG_JR2_Chr3g12210a | Lipase                                            | C-compound and carbohydrate metabolism | 4.43                           |
| VDAG_JR2_Chr3g12300a | Pectate lyase                                     | C-compound and carbohydrate metabolism | 2.07                           |
| VDAG_JR2_Chr3g12310a | Arabinose 5-phosphate isomerase                   | C-compound and carbohydrate metabolism | 2.80                           |

| Gene identifier      | Protein name                                     | FunCat description                     | log <sub>2</sub> (fold change) |
|----------------------|--------------------------------------------------|----------------------------------------|--------------------------------|
| VDAG_JR2_Chr3g12360a | Cellobiose dehydrogenase                         | C-compound and carbohydrate metabolism | 2.27                           |
| VDAG_JR2_Chr3g12560a | Maltose permease MAL31                           | C-compound and carbohydrate metabolism | 1.21                           |
| VDAG_JR2_Chr3g12810a | FAD binding domain-containing protein            | C-compound and carbohydrate metabolism | 1.55                           |
| VDAG_JR2_Chr3g12900a | Alpha-glucosides permease MPH2/3                 | C-compound and carbohydrate metabolism | 1.08                           |
| VDAG_JR2_Chr3g13180a | Succinate-semialdehyde dehydrogenase             | C-compound and carbohydrate metabolism | 1.68                           |
| VDAG_JR2_Chr4g00210a | Bilirubin oxidase                                | C-compound and carbohydrate metabolism | 6.21                           |
| VDAG_JR2_Chr4g00490a | Bifunctional P-450:NADPH-P450 reductase          | C-compound and carbohydrate metabolism | 2.42                           |
| VDAG_JR2_Chr4g01630a | Aerobactin siderophore biosynthesis protein iucB | C-compound and carbohydrate metabolism | 3.37                           |
| VDAG_JR2_Chr4g03030a | Bifunctional P-450:NADPH-P450 reductase          | C-compound and carbohydrate metabolism | 1.69                           |
| VDAG_JR2_Chr4g03140a | Carnitine O-palmitoyltransferase I               | C-compound and carbohydrate metabolism | 1.14                           |
| VDAG_JR2_Chr4g04660a | Cytochrome b2                                    | C-compound and carbohydrate metabolism | 4.01                           |
| VDAG_JR2_Chr4g04990a | Phosphoglycerate mutase family protein           | C-compound and carbohydrate metabolism | 1.82                           |
| VDAG_JR2_Chr4g05020a | Lactose regulatory protein LAC9                  | C-compound and carbohydrate metabolism | 1.25                           |
| VDAG_JR2_Chr4g05190a | Putative uncharacterized protein                 | C-compound and carbohydrate metabolism | 1.12                           |
| VDAG_JR2_Chr4g05940a | Alpha-glucosides permease MPH2/3                 | C-compound and carbohydrate metabolism | 4.31                           |
| VDAG_JR2_Chr4g06500a | Proton myo-inositol cotransporter                | C-compound and carbohydrate metabolism | 1.73                           |
| VDAG_JR2_Chr4g07460a | FAD binding domain-containing protein            | C-compound and carbohydrate metabolism | 1.27                           |
| VDAG_JR2_Chr4g08080a | 1,3(4)-beta-glucanase                            | C-compound and carbohydrate metabolism | 1.34                           |
| VDAG_JR2_Chr4g09320a | Phosphoenolpyruvate carboxykinase                | C-compound and carbohydrate metabolism | 1.32                           |
| VDAG_JR2_Chr4g09630a | Carbonic anhydrase                               | C-compound and carbohydrate metabolism | 2.83                           |
| VDAG_JR2_Chr4g10620a | Salicylate hydroxylase                           | C-compound and carbohydrate metabolism | 3.47                           |
| VDAG_JR2_Chr4g11100a | Mannan endo-1,4-beta-mannosidase                 | C-compound and carbohydrate metabolism | 1.40                           |
| VDAG_JR2_Chr4g11730a | Quinone oxidoreductase                           | C-compound and carbohydrate metabolism | 1.76                           |
| VDAG_JR2_Chr4g11890a | Glucanase (EC 3.2.1.-)                           | C-compound and carbohydrate metabolism | 1.66                           |
| VDAG_JR2_Chr4g12150a | 3-oxoacyl-[acyl-carrier-protein] reductase       | C-compound and carbohydrate metabolism | 1.26                           |
| VDAG_JR2_Chr4g12400a | Oxidoreductase                                   | C-compound and carbohydrate metabolism | 3.07                           |

| Gene identifier      | Protein name                                       | FunCat description                     | log <sub>2</sub> (fold change) |
|----------------------|----------------------------------------------------|----------------------------------------|--------------------------------|
| VDAG_JR2_Chr4g12450a | Glucanase B                                        | C-compound and carbohydrate metabolism | 3.04                           |
| VDAG_JR2_Chr5g00060a | Aldehyde dehydrogenase                             | C-compound and carbohydrate metabolism | 3.15                           |
| VDAG_JR2_Chr5g00860a | Glucose oxidase                                    | C-compound and carbohydrate metabolism | 1.39                           |
| VDAG_JR2_Chr5g03220a | Alpha-galactosidase (EC 3.2.1.22)<br>(Melibiase)   | C-compound and carbohydrate metabolism | 1.53                           |
| VDAG_JR2_Chr5g03240a | Maltose permease MAL31                             | C-compound and carbohydrate metabolism | 1.20                           |
| VDAG_JR2_Chr5g04160a | Proton myo-inositol cotransporter                  | C-compound and carbohydrate metabolism | 2.51                           |
| VDAG_JR2_Chr5g04280a | NAD(P) transhydrogenase                            | C-compound and carbohydrate metabolism | 1.85                           |
| VDAG_JR2_Chr5g04430a | Glutathione-independent formaldehyde dehydrogenase | C-compound and carbohydrate metabolism | 2.63                           |
| VDAG_JR2_Chr5g06370a | Beta-galactosidase                                 | C-compound and carbohydrate metabolism | 1.25                           |
| VDAG_JR2_Chr5g07180a | Rhamnogalacturonan acetyltransferase               | C-compound and carbohydrate metabolism | 1.63                           |
| VDAG_JR2_Chr5g11040a | Alcohol oxidase                                    | C-compound and carbohydrate metabolism | 3.50                           |
| VDAG_JR2_Chr5g11880a | Choline dehydrogenase                              | C-compound and carbohydrate metabolism | 1.24                           |
| VDAG_JR2_Chr6g01130a | FAD binding domain-containing protein              | C-compound and carbohydrate metabolism | 5.17                           |
| VDAG_JR2_Chr6g02300a | Choline dehydrogenase                              | C-compound and carbohydrate metabolism | 2.31                           |
| VDAG_JR2_Chr6g02560a | Putative uncharacterized protein                   | C-compound and carbohydrate metabolism | 1.27                           |
| VDAG_JR2_Chr6g02580a | Xylulose-5-phosphate phosphoketolase               | C-compound and carbohydrate metabolism | 1.20                           |
| VDAG_JR2_Chr6g03200a | Aldehyde reductase                                 | C-compound and carbohydrate metabolism | 2.87                           |
| VDAG_JR2_Chr6g04040a | Endo-1,4-beta-xylanase (EC 3.2.1.8)                | C-compound and carbohydrate metabolism | 1.42                           |
| VDAG_JR2_Chr6g04060a | Beta-fructofuranosidase                            | C-compound and carbohydrate metabolism | 1.28                           |
| VDAG_JR2_Chr6g05470a | Short chain dehydrogenase                          | C-compound and carbohydrate metabolism | 1.20                           |
| VDAG_JR2_Chr6g06050a | Alcohol dehydrogenase                              | C-compound and carbohydrate metabolism | 2.02                           |
| VDAG_JR2_Chr6g06060a | 4-trimethylaminobutyraldehyde dehydrogenase        | C-compound and carbohydrate metabolism | 1.39                           |
| VDAG_JR2_Chr6g08420a | Amine oxidase B                                    | C-compound and carbohydrate metabolism | 1.26                           |
| VDAG_JR2_Chr6g08780a | Alpha-xylosidase                                   | C-compound and carbohydrate metabolism | 1.11                           |
| VDAG_JR2_Chr6g08800a | General alpha-glucoside permease                   | C-compound and carbohydrate metabolism | 3.19                           |
| VDAG_JR2_Chr6g09440a | Aldose 1-epimerase                                 | C-compound and carbohydrate metabolism | 1.93                           |

| Gene identifier      | Protein name                                                         | FunCat description                     | log <sub>2</sub> (fold change) |
|----------------------|----------------------------------------------------------------------|----------------------------------------|--------------------------------|
| VDAG_JR2_Chr6g09680a | Alcohol oxidase                                                      | C-compound and carbohydrate metabolism | 1.47                           |
| VDAG_JR2_Chr6g10300a | Acetolactate synthase                                                | C-compound and carbohydrate metabolism | 2.33                           |
| VDAG_JR2_Chr6g10630a | Succinyl-CoA:3-ketoacid-coenzyme A transferase (EC 2.8.3.5)          | C-compound and carbohydrate metabolism | 1.87                           |
| VDAG_JR2_Chr7g00085a | Malic enzyme                                                         | C-compound and carbohydrate metabolism | 1.94                           |
| VDAG_JR2_Chr7g00310a | Glucanase (EC 3.2.1.-)                                               | C-compound and carbohydrate metabolism | 1.54                           |
| VDAG_JR2_Chr7g01080a | 3-hydroxyacyl-CoA dehydrogenase type-2                               | C-compound and carbohydrate metabolism | 1.23                           |
| VDAG_JR2_Chr7g02610a | Putative uncharacterized protein                                     | C-compound and carbohydrate metabolism | 1.74                           |
| VDAG_JR2_Chr7g02640a | Osmotic growth protein                                               | C-compound and carbohydrate metabolism | 1.68                           |
| VDAG_JR2_Chr7g03350a | Exo-rhamnogalacturonase B                                            | C-compound and carbohydrate metabolism | 1.10                           |
| VDAG_JR2_Chr7g03620a | Aldehyde dehydrogenase                                               | C-compound and carbohydrate metabolism | 1.02                           |
| VDAG_JR2_Chr7g05780a | Putative uncharacterized protein                                     | C-compound and carbohydrate metabolism | 1.75                           |
| VDAG_JR2_Chr7g08570a | Putative uncharacterized protein                                     | C-compound and carbohydrate metabolism | 1.10                           |
| VDAG_JR2_Chr7g09240a | Pectate lyase A                                                      | C-compound and carbohydrate metabolism | 1.50                           |
| VDAG_JR2_Chr7g09570a | Sugar transporter                                                    | C-compound and carbohydrate metabolism | 1.01                           |
| VDAG_JR2_Chr7g09740a | Epoxide hydrolase                                                    | C-compound and carbohydrate metabolism | 1.05                           |
| VDAG_JR2_Chr8g00100a | Lactonohydrolase                                                     | C-compound and carbohydrate metabolism | 1.91                           |
| VDAG_JR2_Chr8g00620a | Glycerate kinase                                                     | C-compound and carbohydrate metabolism | 3.13                           |
| VDAG_JR2_Chr8g01010a | Endoplasmic reticulum mannosyl-oligosaccharide 1,2-alpha-mannosidase | C-compound and carbohydrate metabolism | 1.71                           |
| VDAG_JR2_Chr8g01020a | D-lactate dehydrogenase                                              | C-compound and carbohydrate metabolism | 1.80                           |
| VDAG_JR2_Chr8g01390a | Maltose permease MAL31                                               | C-compound and carbohydrate metabolism | 3.28                           |
| VDAG_JR2_Chr8g01610a | Maleylacetate reductase                                              | C-compound and carbohydrate metabolism | 2.27                           |
| VDAG_JR2_Chr8g01840a | Sugar transporter family protein                                     | C-compound and carbohydrate metabolism | 1.33                           |
| VDAG_JR2_Chr8g02110a | Alcohol dehydrogenase                                                | C-compound and carbohydrate metabolism | 1.69                           |
| VDAG_JR2_Chr8g02120a | Aldehyde dehydrogenase                                               | C-compound and carbohydrate metabolism | 1.11                           |
| VDAG_JR2_Chr8g02750a | GS1 protein                                                          | C-compound and carbohydrate metabolism | 2.92                           |
| VDAG_JR2_Chr8g03620a | Alcohol dehydrogenase                                                | C-compound and carbohydrate metabolism | 1.79                           |
| VDAG_JR2_Chr8g03780a | Pectinesterase                                                       | C-compound and carbohydrate metabolism | 1.20                           |

| Gene identifier      | Protein name                                  | FunCat description                     | log <sub>2</sub> (fold change) |
|----------------------|-----------------------------------------------|----------------------------------------|--------------------------------|
| VDAG_JR2_Chr8g07660a | Alpha-galactosidase (EC 3.2.1.22) (Melibiase) | C-compound and carbohydrate metabolism | 1.15                           |
| VDAG_JR2_Chr8g07670a | Maltose permease MAL31                        | C-compound and carbohydrate metabolism | 1.64                           |
| VDAG_JR2_Chr8g09210a | Carboxylic acid transport protein             | C-compound and carbohydrate metabolism | 7.57                           |
| VDAG_JR2_Chr8g09450a | 4-coumarate-CoA ligase                        | C-compound and carbohydrate metabolism | 1.95                           |
| VDAG_JR2_Chr8g09730a | Putative uncharacterized protein              | C-compound and carbohydrate metabolism | 4.46                           |
| VDAG_JR2_Chr1g01070a | Putative uncharacterized protein              | C-compound and carbohydrate transport  | 4.75                           |
| VDAG_JR2_Chr1g01080a | Maltose permease                              | C-compound and carbohydrate transport  | 2.77                           |
| VDAG_JR2_Chr1g01185a | Hexose transporter                            | C-compound and carbohydrate transport  | 1.51                           |
| VDAG_JR2_Chr1g01440a | Sugar transporter                             | C-compound and carbohydrate transport  | 1.62                           |
| VDAG_JR2_Chr1g01710a | Inner membrane transport protein yfaV         | C-compound and carbohydrate transport  | 1.52                           |
| VDAG_JR2_Chr1g02220a | Sugar transporter                             | C-compound and carbohydrate transport  | 2.06                           |
| VDAG_JR2_Chr1g05760a | Galactose-proton symporter                    | C-compound and carbohydrate transport  | 1.70                           |
| VDAG_JR2_Chr1g10200a | Galactose-proton symporter                    | C-compound and carbohydrate transport  | 2.85                           |
| VDAG_JR2_Chr1g11690a | Putative uncharacterized protein              | C-compound and carbohydrate transport  | 1.34                           |
| VDAG_JR2_Chr1g12250a | Choline transport protein                     | C-compound and carbohydrate transport  | 1.50                           |
| VDAG_JR2_Chr1g18850a | Putative uncharacterized protein              | C-compound and carbohydrate transport  | 1.14                           |
| VDAG_JR2_Chr1g22050a | Sugar transporter STL1                        | C-compound and carbohydrate transport  | 2.06                           |
| VDAG_JR2_Chr1g24520a | Sugar transporter                             | C-compound and carbohydrate transport  | 1.70                           |
| VDAG_JR2_Chr1g25420a | Urea active transporter                       | C-compound and carbohydrate transport  | 1.17                           |
| VDAG_JR2_Chr1g26920a | High-affinity glucose transporter SNF3        | C-compound and carbohydrate transport  | 1.27                           |
| VDAG_JR2_Chr1g27550a | Urea active transporter                       | C-compound and carbohydrate transport  | 2.12                           |
| VDAG_JR2_Chr2g02540a | Pantothenate transporter liz1                 | C-compound and carbohydrate transport  | 7.40                           |
| VDAG_JR2_Chr2g02970a | Integral membrane protein                     | C-compound and carbohydrate transport  | 1.18                           |
| VDAG_JR2_Chr2g04380a | Integral membrane protein                     | C-compound and carbohydrate transport  | 1.88                           |
| VDAG_JR2_Chr2g04500a | Quinate permease                              | C-compound and carbohydrate transport  | 4.34                           |
| VDAG_JR2_Chr2g08880a | Maltose permease MAL31                        | C-compound and carbohydrate transport  | 1.34                           |
| VDAG_JR2_Chr2g12320a | General alpha-glucoside permease              | C-compound and carbohydrate transport  | 1.43                           |
| VDAG_JR2_Chr2g13170a | Putative uncharacterized protein              | C-compound and carbohydrate transport  | 1.08                           |

| Gene identifier      | Protein name                             | FunCat description                    | log <sub>2</sub> (fold change) |
|----------------------|------------------------------------------|---------------------------------------|--------------------------------|
| VDAG_JR2_Chr3g01050a | Membrane transporter D1                  | C-compound and carbohydrate transport | 1.34                           |
| VDAG_JR2_Chr3g10430a | Lactose permease                         | C-compound and carbohydrate transport | 4.55                           |
| VDAG_JR2_Chr3g10590a | General alpha-glucoside permease         | C-compound and carbohydrate transport | 1.66                           |
| VDAG_JR2_Chr3g12560a | Maltose permease MAL31                   | C-compound and carbohydrate transport | 1.21                           |
| VDAG_JR2_Chr3g12800a | Putative uncharacterized protein         | C-compound and carbohydrate transport | 1.71                           |
| VDAG_JR2_Chr3g12900a | Alpha-glucosides permease MPH2/3         | C-compound and carbohydrate transport | 1.08                           |
| VDAG_JR2_Chr4g01150a | Glucose/galactose transporter            | C-compound and carbohydrate transport | 1.91                           |
| VDAG_JR2_Chr4g01750a | Sugar transporter                        | C-compound and carbohydrate transport | 1.33                           |
| VDAG_JR2_Chr4g02440a | Putative uncharacterized protein         | C-compound and carbohydrate transport | 1.34                           |
| VDAG_JR2_Chr4g03140a | Carnitine O-palmitoyltransferase I       | C-compound and carbohydrate transport | 1.14                           |
| VDAG_JR2_Chr4g05930a | Putative uncharacterized protein         | C-compound and carbohydrate transport | 3.10                           |
| VDAG_JR2_Chr4g05940a | Alpha-glucosides permease MPH2/3         | C-compound and carbohydrate transport | 4.31                           |
| VDAG_JR2_Chr4g06500a | Proton myo-inositol cotransporter        | C-compound and carbohydrate transport | 1.73                           |
| VDAG_JR2_Chr4g10760a | Choline transport protein                | C-compound and carbohydrate transport | 4.55                           |
| VDAG_JR2_Chr4g11930a | Integral membrane protein                | C-compound and carbohydrate transport | 1.68                           |
| VDAG_JR2_Chr4g12110a | High-affinity nicotinic acid transporter | C-compound and carbohydrate transport | 1.50                           |
| VDAG_JR2_Chr5g00190a | Glucose transporter                      | C-compound and carbohydrate transport | 1.09                           |
| VDAG_JR2_Chr5g03240a | Maltose permease MAL31                   | C-compound and carbohydrate transport | 1.20                           |
| VDAG_JR2_Chr5g03740a | Lactose permease                         | C-compound and carbohydrate transport | 1.89                           |
| VDAG_JR2_Chr5g04160a | Proton myo-inositol cotransporter        | C-compound and carbohydrate transport | 2.51                           |
| VDAG_JR2_Chr5g05100a | Quinate permease                         | C-compound and carbohydrate transport | 1.56                           |
| VDAG_JR2_Chr5g06010a | DUF250 domain membrane protein           | C-compound and carbohydrate transport | 1.31                           |
| VDAG_JR2_Chr5g06930a | Choline transport protein                | C-compound and carbohydrate transport | 4.08                           |
| VDAG_JR2_Chr5g07790a | Solute carrier family 35 member E3       | C-compound and carbohydrate transport | 1.61                           |
| VDAG_JR2_Chr6g01260a | Pantothenate transporter liz1            | C-compound and carbohydrate transport | 2.12                           |
| VDAG_JR2_Chr6g01290a | Lactose permease                         | C-compound and carbohydrate transport | 1.17                           |
| VDAG_JR2_Chr6g08800a | General alpha-glucoside permease         | C-compound and carbohydrate transport | 3.19                           |
| VDAG_JR2_Chr6g09100a | Putative uncharacterized protein         | C-compound and carbohydrate transport | 1.69                           |
| VDAG_JR2_Chr6g09710a | Quinate permease                         | C-compound and carbohydrate transport | 1.04                           |

| Gene identifier     | Protein name                            | FunCat description                    | log <sub>2</sub> (fold change) |
|---------------------|-----------------------------------------|---------------------------------------|--------------------------------|
| VDAG_JR2_Ch6g10740a | High-affinity glucose transporter RGT2  | C-compound and carbohydrate transport | 6.81                           |
| VDAG_JR2_Ch7g00030a | Pantothenate transporter liz1           | C-compound and carbohydrate transport | 1.02                           |
| VDAG_JR2_Ch7g03610a | Riboflavin transporter MCH5             | C-compound and carbohydrate transport | 2.36                           |
| VDAG_JR2_Ch7g07610a | Choline transport protein               | C-compound and carbohydrate transport | 1.12                           |
| VDAG_JR2_Ch7g09570a | Sugar transporter                       | C-compound and carbohydrate transport | 1.01                           |
| VDAG_JR2_Ch8g00880a | Lactose permease                        | C-compound and carbohydrate transport | 1.88                           |
| VDAG_JR2_Ch8g00990a | Sugar transporter                       | C-compound and carbohydrate transport | 2.49                           |
| VDAG_JR2_Ch8g01050a | Phthalate transporter                   | C-compound and carbohydrate transport | 1.36                           |
| VDAG_JR2_Ch8g01260a | L-fucose transporter                    | C-compound and carbohydrate transport | 5.47                           |
| VDAG_JR2_Ch8g01390a | Maltose permease MAL31                  | C-compound and carbohydrate transport | 3.28                           |
| VDAG_JR2_Ch8g01840a | Sugar transporter family protein        | C-compound and carbohydrate transport | 1.33                           |
| VDAG_JR2_Ch8g02900a | Putative uncharacterized protein        | C-compound and carbohydrate transport | 2.18                           |
| VDAG_JR2_Ch8g07670a | Maltose permease MAL31                  | C-compound and carbohydrate transport | 1.64                           |
| VDAG_JR2_Ch8g09210a | Carboxylic acid transport protein       | C-compound and carbohydrate transport | 7.57                           |
| VDAG_JR2_Ch8g11120a | Integral membrane protein               | C-compound and carbohydrate transport | 2.51                           |
| VDAG_JR2_Ch1g00390a | Iron transport multicopper oxidase FET3 | Cellular import                       | 4.06                           |
| VDAG_JR2_Ch1g01070a | Putative uncharacterized protein        | Cellular import                       | 4.75                           |
| VDAG_JR2_Ch1g01185a | Hexose transporter                      | Cellular import                       | 1.51                           |
| VDAG_JR2_Ch1g01440a | Sugar transporter                       | Cellular import                       | 1.62                           |
| VDAG_JR2_Ch1g01710a | Inner membrane transport protein yfaV   | Cellular import                       | 1.52                           |
| VDAG_JR2_Ch1g02220a | Sugar transporter                       | Cellular import                       | 2.06                           |
| VDAG_JR2_Ch1g05010a | Peptide transporter PTR2                | Cellular import                       | 3.23                           |
| VDAG_JR2_Ch1g05030a | Ferric-chelate reductase                | Cellular import                       | 1.93                           |
| VDAG_JR2_Ch1g05760a | Galactose-proton symporter              | Cellular import                       | 1.70                           |
| VDAG_JR2_Ch1g08890a | Putative uncharacterized protein        | Cellular import                       | 1.29                           |
| VDAG_JR2_Ch1g10200a | Galactose-proton symporter              | Cellular import                       | 2.85                           |
| VDAG_JR2_Ch1g12250a | Choline transport protein               | Cellular import                       | 1.50                           |
| VDAG_JR2_Ch1g15800a | Cobalt uptake protein COT1              | Cellular import                       | 2.19                           |
| VDAG_JR2_Ch1g22050a | Sugar transporter STL1                  | Cellular import                       | 2.06                           |

| Gene identifier      | Protein name                           | FunCat description | log <sub>2</sub> (fold change) |
|----------------------|----------------------------------------|--------------------|--------------------------------|
| VDAG_JR2_Chr1g24150a | Uracil permease                        | Cellular import    | 4.12                           |
| VDAG_JR2_Chr1g24520a | Sugar transporter                      | Cellular import    | 1.70                           |
| VDAG_JR2_Chr1g24720a | Allantoate permease                    | Cellular import    | 1.03                           |
| VDAG_JR2_Chr1g26920a | High-affinity glucose transporter SNF3 | Cellular import    | 1.27                           |
| VDAG_JR2_Chr2g02900a | High-affinity methionine permease      | Cellular import    | 1.66                           |
| VDAG_JR2_Chr2g03860a | Inner membrane transport protein yfaV  | Cellular import    | 2.02                           |
| VDAG_JR2_Chr2g04500a | Quinate permease                       | Cellular import    | 4.34                           |
| VDAG_JR2_Chr2g04660a | Lysine-specific permease               | Cellular import    | 1.42                           |
| VDAG_JR2_Chr2g08730a | Putative uncharacterized protein       | Cellular import    | 1.43                           |
| VDAG_JR2_Chr2g08880a | Maltose permease MAL31                 | Cellular import    | 1.34                           |
| VDAG_JR2_Chr2g09810a | Inner membrane protein yicO            | Cellular import    | 1.44                           |
| VDAG_JR2_Chr2g12320a | General alpha-glucoside permease       | Cellular import    | 1.43                           |
| VDAG_JR2_Chr2g13170a | Putative uncharacterized protein       | Cellular import    | 1.08                           |
| VDAG_JR2_Chr3g01050a | Membrane transporter D1                | Cellular import    | 1.34                           |
| VDAG_JR2_Chr3g10430a | Lactose permease                       | Cellular import    | 4.55                           |
| VDAG_JR2_Chr3g12560a | Maltose permease MAL31                 | Cellular import    | 1.21                           |
| VDAG_JR2_Chr3g12900a | Alpha-glucosides permease MPH2/3       | Cellular import    | 1.08                           |
| VDAG_JR2_Chr4g00720a | Phosphate transporter family protein   | Cellular import    | 1.67                           |
| VDAG_JR2_Chr4g01150a | Glucose/galactose transporter          | Cellular import    | 1.91                           |
| VDAG_JR2_Chr4g01620a | Sulfate permease                       | Cellular import    | 3.70                           |
| VDAG_JR2_Chr4g01750a | Sugar transporter                      | Cellular import    | 1.33                           |
| VDAG_JR2_Chr4g06500a | Proton myo-inositol cotransporter      | Cellular import    | 1.73                           |
| VDAG_JR2_Chr4g07840a | Potassium transporter 1                | Cellular import    | 1.47                           |
| VDAG_JR2_Chr4g10760a | Choline transport protein              | Cellular import    | 4.55                           |
| VDAG_JR2_Chr4g11570a | Metalloreductase                       | Cellular import    | 1.15                           |
| VDAG_JR2_Chr4g11820a | General amino-acid permease GAP1       | Cellular import    | 2.99                           |
| VDAG_JR2_Chr4g12160a | Ammonium transporter 1                 | Cellular import    | 2.22                           |
| VDAG_JR2_Chr4g12390a | Putative uncharacterized protein       | Cellular import    | 8.31                           |
| VDAG_JR2_Chr5g00190a | Glucose transporter                    | Cellular import    | 1.09                           |

| Gene identifier      | Protein name                               | FunCat description | log <sub>2</sub> (fold change) |
|----------------------|--------------------------------------------|--------------------|--------------------------------|
| VDAG_JR2_Chr5g01900a | High-affinity potassium transport protein  | Cellular import    | 3.47                           |
| VDAG_JR2_Chr5g03240a | Maltose permease MAL31                     | Cellular import    | 1.20                           |
| VDAG_JR2_Chr5g03740a | Lactose permease                           | Cellular import    | 1.89                           |
| VDAG_JR2_Chr5g06930a | Choline transport protein                  | Cellular import    | 4.08                           |
| VDAG_JR2_Chr6g01260a | Pantothenate transporter liz1              | Cellular import    | 2.12                           |
| VDAG_JR2_Chr6g01290a | Lactose permease                           | Cellular import    | 1.17                           |
| VDAG_JR2_Chr6g02110a | Thiamine transporter                       | Cellular import    | 1.23                           |
| VDAG_JR2_Chr6g02450a | Putative uncharacterized protein           | Cellular import    | 1.17                           |
| VDAG_JR2_Chr6g03600a | Low-affinity potassium transport protein   | Cellular import    | 1.13                           |
| VDAG_JR2_Chr6g04250a | Pantothenate transporter liz1              | Cellular import    | 3.63                           |
| VDAG_JR2_Chr6g07520a | Ferric reductase transmembrane component 5 | Cellular import    | 1.22                           |
| VDAG_JR2_Chr6g08800a | General alpha-glucoside permease           | Cellular import    | 3.19                           |
| VDAG_JR2_Chr6g09380a | Allantoate permease                        | Cellular import    | 1.29                           |
| VDAG_JR2_Chr6g10740a | High-affinity glucose transporter RGT2     | Cellular import    | 6.81                           |
| VDAG_JR2_Chr7g00030a | Pantothenate transporter liz1              | Cellular import    | 1.02                           |
| VDAG_JR2_Chr7g02750a | Low-affinity potassium transport protein   | Cellular import    | 1.50                           |
| VDAG_JR2_Chr7g03220a | Allantoate permease                        | Cellular import    | 1.78                           |
| VDAG_JR2_Chr7g05140a | Uric acid-xanthine permease                | Cellular import    | 1.33                           |
| VDAG_JR2_Chr7g05460a | Putative uncharacterized protein           | Cellular import    | 1.22                           |
| VDAG_JR2_Chr7g06430a | FreB                                       | Cellular import    | 1.69                           |
| VDAG_JR2_Chr7g07610a | Choline transport protein                  | Cellular import    | 1.12                           |
| VDAG_JR2_Chr7g10310a | Amino-acid permease inda1                  | Cellular import    | 1.13                           |
| VDAG_JR2_Chr7g10440a | Sodium/nucleoside cotransporter            | Cellular import    | 1.21                           |
| VDAG_JR2_Chr8g00880a | Lactose permease                           | Cellular import    | 1.88                           |
| VDAG_JR2_Chr8g00990a | Sugar transporter                          | Cellular import    | 2.49                           |
| VDAG_JR2_Chr8g01260a | L-fucose transporter                       | Cellular import    | 5.47                           |
| VDAG_JR2_Chr8g01390a | Maltose permease MAL31                     | Cellular import    | 3.28                           |
| VDAG_JR2_Chr8g02900a | Putative uncharacterized protein           | Cellular import    | 2.18                           |

| Gene identifier      | Protein name                                     | FunCat description                         | log <sub>2</sub> (fold change) |
|----------------------|--------------------------------------------------|--------------------------------------------|--------------------------------|
| VDAG_JR2_Chr8g06660a | Ammonium transporter MEP1                        | Cellular import                            | 1.29                           |
| VDAG_JR2_Chr8g07670a | Maltose permease MAL31                           | Cellular import                            | 1.64                           |
| VDAG_JR2_Chr8g10350a | Phthalate transporter                            | Cellular import                            | 3.85                           |
| VDAG_JR2_Chr8g11110a | Allantoate permease                              | Cellular import                            | 1.96                           |
| VDAG_JR2_Chr1g00390a | Iron transport multicopper oxidase FET3          | Homeostasis of metal ions (Na, K, Ca etc.) | 4.06                           |
| VDAG_JR2_Chr1g00400a | Plasma membrane iron permease                    | Homeostasis of metal ions (Na, K, Ca etc.) | 2.03                           |
| VDAG_JR2_Chr1g02790a | Calcium-transporting ATPase                      | Homeostasis of metal ions (Na, K, Ca etc.) | 1.45                           |
| VDAG_JR2_Chr1g05030a | Ferric-chelate reductase                         | Homeostasis of metal ions (Na, K, Ca etc.) | 1.93                           |
| VDAG_JR2_Chr1g08890a | Putative uncharacterized protein                 | Homeostasis of metal ions (Na, K, Ca etc.) | 1.29                           |
| VDAG_JR2_Chr1g15800a | Cobalt uptake protein COT1                       | Homeostasis of metal ions (Na, K, Ca etc.) | 2.19                           |
| VDAG_JR2_Chr1g15850a | ABC transporter CDR4                             | Homeostasis of metal ions (Na, K, Ca etc.) | 1.22                           |
| VDAG_JR2_Chr1g18920a | Putative uncharacterized protein                 | Homeostasis of metal ions (Na, K, Ca etc.) | 1.06                           |
| VDAG_JR2_Chr1g22590a | Vacuolar calcium ion transporter                 | Homeostasis of metal ions (Na, K, Ca etc.) | 3.81                           |
| VDAG_JR2_Chr1g26890a | Pleiotropic ABC multiple drug efflux transporter | Homeostasis of metal ions (Na, K, Ca etc.) | 1.07                           |
| VDAG_JR2_Chr1g29160a | Calcium-transporting ATPase                      | Homeostasis of metal ions (Na, K, Ca etc.) | 1.22                           |
| VDAG_JR2_Chr2g02790a | Glutamate carboxypeptidase                       | Homeostasis of metal ions (Na, K, Ca etc.) | 1.07                           |
| VDAG_JR2_Chr2g04730a | Zinc/iron transporter protein                    | Homeostasis of metal ions (Na, K, Ca etc.) | 1.13                           |
| VDAG_JR2_Chr2g13190a | Voltage-gated potassium channel subunit beta-3   | Homeostasis of metal ions (Na, K, Ca etc.) | 1.20                           |
| VDAG_JR2_Chr3g05190a | Sodium/calcium exchanger protein                 | Homeostasis of metal ions (Na, K, Ca etc.) | 1.17                           |
| VDAG_JR2_Chr3g11520a | Potassium channel                                | Homeostasis of metal ions (Na, K, Ca etc.) | 1.06                           |
| VDAG_JR2_Chr4g00520a | Nonribosomal peptide synthetase                  | Homeostasis of metal ions (Na, K, Ca etc.) | 1.15                           |
| VDAG_JR2_Chr4g01640a | DUF907 domain-containing protein                 | Homeostasis of metal ions (Na, K, Ca etc.) | 4.68                           |
| VDAG_JR2_Chr4g04200a | Calcium permease                                 | Homeostasis of metal ions (Na, K, Ca etc.) | 1.15                           |
| VDAG_JR2_Chr4g11570a | Metalloreductase                                 | Homeostasis of metal ions (Na, K, Ca etc.) | 1.15                           |
| VDAG_JR2_Chr4g11690a | Plasma membrane iron permease                    | Homeostasis of metal ions (Na, K, Ca etc.) | 1.05                           |
| VDAG_JR2_Chr4g11820a | General amino-acid permease GAP1                 | Homeostasis of metal ions (Na, K, Ca etc.) | 2.99                           |
| VDAG_JR2_Chr5g01900a | High-affinity potassium transport protein        | Homeostasis of metal ions (Na, K, Ca etc.) | 3.47                           |

| Gene identifier      | Protein name                                   | FunCat description                         | log <sub>2</sub> (fold change) |
|----------------------|------------------------------------------------|--------------------------------------------|--------------------------------|
| VDAG_JR2_Chr5g01910a | Na <sup>+</sup> /H <sup>+</sup> antiporter     | Homeostasis of metal ions (Na, K, Ca etc.) | 2.53                           |
| VDAG_JR2_Chr5g10400a | Calcium-channel protein cch1                   | Homeostasis of metal ions (Na, K, Ca etc.) | 1.30                           |
| VDAG_JR2_Chr5g12230a | Na <sup>+</sup> /H <sup>+</sup> antiporter     | Homeostasis of metal ions (Na, K, Ca etc.) | 1.49                           |
| VDAG_JR2_Chr6g02450a | Putative uncharacterized protein               | Homeostasis of metal ions (Na, K, Ca etc.) | 1.17                           |
| VDAG_JR2_Chr6g03320a | Putative uncharacterized protein               | Homeostasis of metal ions (Na, K, Ca etc.) | 1.06                           |
| VDAG_JR2_Chr6g03600a | Low-affinity potassium transport protein       | Homeostasis of metal ions (Na, K, Ca etc.) | 1.13                           |
| VDAG_JR2_Chr6g04210a | Siderophore iron transporter mirB              | Homeostasis of metal ions (Na, K, Ca etc.) | 1.70                           |
| VDAG_JR2_Chr6g04520a | Cell division control protein                  | Homeostasis of metal ions (Na, K, Ca etc.) | 1.20                           |
| VDAG_JR2_Chr6g06420a | Multidrug resistance protein CDR2              | Homeostasis of metal ions (Na, K, Ca etc.) | 1.11                           |
| VDAG_JR2_Chr6g07520a | Ferric reductase transmembrane component 5     | Homeostasis of metal ions (Na, K, Ca etc.) | 1.22                           |
| VDAG_JR2_Chr6g09800a | K <sup>+</sup> /H <sup>+</sup> antiporter 1    | Homeostasis of metal ions (Na, K, Ca etc.) | 2.20                           |
| VDAG_JR2_Chr7g02750a | Low-affinity potassium transport protein       | Homeostasis of metal ions (Na, K, Ca etc.) | 1.50                           |
| VDAG_JR2_Chr7g05460a | Putative uncharacterized protein               | Homeostasis of metal ions (Na, K, Ca etc.) | 1.22                           |
| VDAG_JR2_Chr7g06430a | FreB                                           | Homeostasis of metal ions (Na, K, Ca etc.) | 1.69                           |
| VDAG_JR2_Chr7g10310a | Amino-acid permease inda1                      | Homeostasis of metal ions (Na, K, Ca etc.) | 1.13                           |
| VDAG_JR2_Chr8g10170a | Siderophore iron transporter mirB              | Homeostasis of metal ions (Na, K, Ca etc.) | 2.25                           |
| VDAG_JR2_Chr8g10450a | Annexin-B12                                    | Homeostasis of metal ions (Na, K, Ca etc.) | 2.63                           |
| VDAG_JR2_Chr1g10700a | Solute carrier family 12 member 6              | Ion transport                              | 2.26                           |
| VDAG_JR2_Chr1g15800a | Cobalt uptake protein COT1                     | Ion transport                              | 2.19                           |
| VDAG_JR2_Chr1g24720a | Allantoate permease                            | Ion transport                              | 1.03                           |
| VDAG_JR2_Chr1g29160a | Calcium-transporting ATPase                    | Ion transport                              | 1.22                           |
| VDAG_JR2_Chr2g07940a | Phospholipid-transporting ATPase               | Ion transport                              | 1.15                           |
| VDAG_JR2_Chr2g13190a | Voltage-gated potassium channel subunit beta-3 | Ion transport                              | 1.20                           |
| VDAG_JR2_Chr3g05190a | Sodium/calcium exchanger protein               | Ion transport                              | 1.17                           |
| VDAG_JR2_Chr3g11010a | Vacuolar ATP synthase 98 kDa subunit           | Ion transport                              | 2.69                           |
| VDAG_JR2_Chr5g01900a | High-affinity potassium transport protein      | Ion transport                              | 3.47                           |
| VDAG_JR2_Chr5g05790a | Membrane transporter                           | Ion transport                              | 1.24                           |

| Gene identifier      | Protein name                                | FunCat description            | log <sub>2</sub> (fold change) |
|----------------------|---------------------------------------------|-------------------------------|--------------------------------|
| VDAG_JR2_Chr5g10400a | Calcium-channel protein cch1                | Ion transport                 | 1.30                           |
| VDAG_JR2_Chr6g03600a | Low-affinity potassium transport protein    | Ion transport                 | 1.13                           |
| VDAG_JR2_Chr6g09380a | Allantoate permease                         | Ion transport                 | 1.29                           |
| VDAG_JR2_Chr6g09800a | K <sup>+</sup> /H <sup>+</sup> antiporter 1 | Ion transport                 | 2.20                           |
| VDAG_JR2_Chr7g02750a | Low-affinity potassium transport protein    | Ion transport                 | 1.50                           |
| VDAG_JR2_Chr7g07860a | Chloride channel protein                    | Ion transport                 | 1.31                           |
| VDAG_JR2_Chr8g09730a | Putative uncharacterized protein            | Ion transport                 | 4.46                           |
| VDAG_JR2_Chr1g15230a | Spermidine synthase                         | Metabolism of amines          | 1.58                           |
| VDAG_JR2_Chr2g13240a | Choline dehydrogenase                       | Metabolism of amines          | 4.55                           |
| VDAG_JR2_Chr3g12360a | Cellobiose dehydrogenase                    | Metabolism of amines          | 2.27                           |
| VDAG_JR2_Chr4g10210a | Amine oxidase                               | Metabolism of amines          | 1.40                           |
| VDAG_JR2_Chr4g10770a | Amine oxidase                               | Metabolism of amines          | 3.27                           |
| VDAG_JR2_Chr5g00860a | Glucose oxidase                             | Metabolism of amines          | 1.39                           |
| VDAG_JR2_Chr5g00970a | Choline monooxygenase                       | Metabolism of amines          | 1.93                           |
| VDAG_JR2_Chr5g06940a | Monoamine oxidase N                         | Metabolism of amines          | 4.95                           |
| VDAG_JR2_Chr5g11040a | Alcohol oxidase                             | Metabolism of amines          | 3.50                           |
| VDAG_JR2_Chr5g11880a | Choline dehydrogenase                       | Metabolism of amines          | 1.24                           |
| VDAG_JR2_Chr6g02300a | Choline dehydrogenase                       | Metabolism of amines          | 2.31                           |
| VDAG_JR2_Chr6g08420a | Amine oxidase B                             | Metabolism of amines          | 1.26                           |
| VDAG_JR2_Chr6g09680a | Alcohol oxidase                             | Metabolism of amines          | 1.47                           |
| VDAG_JR2_Chr7g07620a | Amine oxidase                               | Metabolism of amines          | 2.22                           |
| VDAG_JR2_Chr1g01070a | Putative uncharacterized protein            | Non-vesicular cellular import | 4.75                           |
| VDAG_JR2_Chr1g01080a | Maltose permease                            | Non-vesicular cellular import | 2.77                           |
| VDAG_JR2_Chr1g01185a | Hexose transporter                          | Non-vesicular cellular import | 1.51                           |
| VDAG_JR2_Chr1g01440a | Sugar transporter                           | Non-vesicular cellular import | 1.62                           |
| VDAG_JR2_Chr1g01710a | Inner membrane transport protein yfaV       | Non-vesicular cellular import | 1.52                           |
| VDAG_JR2_Chr1g02220a | Sugar transporter                           | Non-vesicular cellular import | 2.06                           |
| VDAG_JR2_Chr1g05010a | Peptide transporter PTR2                    | Non-vesicular cellular import | 3.23                           |

| Gene identifier      | Protein name                             | FunCat description            | log <sub>2</sub> (fold change) |
|----------------------|------------------------------------------|-------------------------------|--------------------------------|
| VDAG_JR2_Chr1g05760a | Galactose-proton symporter               | Non-vesicular cellular import | 1.70                           |
| VDAG_JR2_Chr1g10200a | Galactose-proton symporter               | Non-vesicular cellular import | 2.85                           |
| VDAG_JR2_Chr1g18850a | Putative uncharacterized protein         | Non-vesicular cellular import | 1.14                           |
| VDAG_JR2_Chr1g22050a | Sugar transporter STL1                   | Non-vesicular cellular import | 2.06                           |
| VDAG_JR2_Chr1g23370a | Aquaporin-2                              | Non-vesicular cellular import | 3.31                           |
| VDAG_JR2_Chr1g24150a | Uracil permease                          | Non-vesicular cellular import | 4.12                           |
| VDAG_JR2_Chr1g24520a | Sugar transporter                        | Non-vesicular cellular import | 1.70                           |
| VDAG_JR2_Chr1g24720a | Allantoate permease                      | Non-vesicular cellular import | 1.03                           |
| VDAG_JR2_Chr1g24790a | High-affinity nicotinic acid transporter | Non-vesicular cellular import | 2.54                           |
| VDAG_JR2_Chr1g26920a | High-affinity glucose transporter SNF3   | Non-vesicular cellular import | 1.27                           |
| VDAG_JR2_Chr2g02900a | High-affinity methionine permease        | Non-vesicular cellular import | 1.66                           |
| VDAG_JR2_Chr2g03860a | Inner membrane transport protein yfaV    | Non-vesicular cellular import | 2.02                           |
| VDAG_JR2_Chr2g04500a | Quinate permease                         | Non-vesicular cellular import | 4.34                           |
| VDAG_JR2_Chr2g04660a | Lysine-specific permease                 | Non-vesicular cellular import | 1.42                           |
| VDAG_JR2_Chr2g04730a | Zinc/iron transporter protein            | Non-vesicular cellular import | 1.13                           |
| VDAG_JR2_Chr2g08730a | Putative uncharacterized protein         | Non-vesicular cellular import | 1.43                           |
| VDAG_JR2_Chr2g08880a | Maltose permease MAL31                   | Non-vesicular cellular import | 1.34                           |
| VDAG_JR2_Chr2g12320a | General alpha-glucoside permease         | Non-vesicular cellular import | 1.43                           |
| VDAG_JR2_Chr2g13170a | Putative uncharacterized protein         | Non-vesicular cellular import | 1.08                           |
| VDAG_JR2_Chr3g01050a | Membrane transporter D1                  | Non-vesicular cellular import | 1.34                           |
| VDAG_JR2_Chr3g10430a | Lactose permease                         | Non-vesicular cellular import | 4.55                           |
| VDAG_JR2_Chr3g10590a | General alpha-glucoside permease         | Non-vesicular cellular import | 1.66                           |
| VDAG_JR2_Chr3g12560a | Maltose permease MAL31                   | Non-vesicular cellular import | 1.21                           |
| VDAG_JR2_Chr3g12900a | Alpha-glucosides permease MPH2/3         | Non-vesicular cellular import | 1.08                           |
| VDAG_JR2_Chr4g01620a | Sulfate permease                         | Non-vesicular cellular import | 3.70                           |
| VDAG_JR2_Chr4g01750a | Sugar transporter                        | Non-vesicular cellular import | 1.33                           |
| VDAG_JR2_Chr4g01780a | Aquaporin-1                              | Non-vesicular cellular import | 1.14                           |
| VDAG_JR2_Chr4g04720a | Proline-specific permease                | Non-vesicular cellular import | 1.18                           |
| VDAG_JR2_Chr4g05940a | Alpha-glucosides permease MPH2/3         | Non-vesicular cellular import | 4.31                           |

| Gene identifier      | Protein name                              | FunCat description            | log <sub>2</sub> (fold change) |
|----------------------|-------------------------------------------|-------------------------------|--------------------------------|
| VDAG_JR2_Chr4g06500a | Proton myo-inositol cotransporter         | Non-vesicular cellular import | 1.73                           |
| VDAG_JR2_Chr4g10900a | Vitamin H transporter                     | Non-vesicular cellular import | 3.04                           |
| VDAG_JR2_Chr4g11820a | General amino-acid permease GAP1          | Non-vesicular cellular import | 2.99                           |
| VDAG_JR2_Chr4g12110a | High-affinity nicotinic acid transporter  | Non-vesicular cellular import | 1.50                           |
| VDAG_JR2_Chr4g12390a | Putative uncharacterized protein          | Non-vesicular cellular import | 8.31                           |
| VDAG_JR2_Chr4g12420a | Dicarboxylic amino acid permease          | Non-vesicular cellular import | 2.70                           |
| VDAG_JR2_Chr5g00190a | Glucose transporter                       | Non-vesicular cellular import | 1.09                           |
| VDAG_JR2_Chr5g01900a | High-affinity potassium transport protein | Non-vesicular cellular import | 3.47                           |
| VDAG_JR2_Chr5g03240a | Maltose permease MAL31                    | Non-vesicular cellular import | 1.20                           |
| VDAG_JR2_Chr5g03740a | Lactose permease                          | Non-vesicular cellular import | 1.89                           |
| VDAG_JR2_Chr5g04160a | Proton myo-inositol cotransporter         | Non-vesicular cellular import | 2.51                           |
| VDAG_JR2_Chr5g05100a | Quinate permease                          | Non-vesicular cellular import | 1.56                           |
| VDAG_JR2_Chr6g01290a | Lactose permease                          | Non-vesicular cellular import | 1.17                           |
| VDAG_JR2_Chr6g02110a | Thiamine transporter                      | Non-vesicular cellular import | 1.23                           |
| VDAG_JR2_Chr6g03600a | Low-affinity potassium transport protein  | Non-vesicular cellular import | 1.13                           |
| VDAG_JR2_Chr6g04210a | Siderophore iron transporter mirB         | Non-vesicular cellular import | 1.70                           |
| VDAG_JR2_Chr6g04250a | Pantothenate transporter liz1             | Non-vesicular cellular import | 3.63                           |
| VDAG_JR2_Chr6g08800a | General alpha-glucoside permease          | Non-vesicular cellular import | 3.19                           |
| VDAG_JR2_Chr6g09100a | Putative uncharacterized protein          | Non-vesicular cellular import | 1.69                           |
| VDAG_JR2_Chr6g09380a | Allantoate permease                       | Non-vesicular cellular import | 1.29                           |
| VDAG_JR2_Chr6g09710a | Quinate permease                          | Non-vesicular cellular import | 1.04                           |
| VDAG_JR2_Chr6g10740a | High-affinity glucose transporter RGT2    | Non-vesicular cellular import | 6.81                           |
| VDAG_JR2_Chr7g02750a | Low-affinity potassium transport protein  | Non-vesicular cellular import | 1.50                           |
| VDAG_JR2_Chr7g03220a | Allantoate permease                       | Non-vesicular cellular import | 1.78                           |
| VDAG_JR2_Chr7g03610a | Riboflavin transporter MCH5               | Non-vesicular cellular import | 2.36                           |
| VDAG_JR2_Chr7g05140a | Uric acid-xanthine permease               | Non-vesicular cellular import | 1.33                           |
| VDAG_JR2_Chr7g09570a | Sugar transporter                         | Non-vesicular cellular import | 1.01                           |
| VDAG_JR2_Chr7g10310a | Amino-acid permease inda1                 | Non-vesicular cellular import | 1.13                           |
| VDAG_JR2_Chr8g00880a | Lactose permease                          | Non-vesicular cellular import | 1.88                           |

| Gene identifier      | Protein name                                                                                 | FunCat description            | log <sub>2</sub> (fold change) |
|----------------------|----------------------------------------------------------------------------------------------|-------------------------------|--------------------------------|
| VDAG_JR2_Chr8g00990a | Sugar transporter                                                                            | Non-vesicular cellular import | 2.49                           |
| VDAG_JR2_Chr8g01050a | Phthalate transporter                                                                        | Non-vesicular cellular import | 1.36                           |
| VDAG_JR2_Chr8g01390a | Maltose permease MAL31                                                                       | Non-vesicular cellular import | 3.28                           |
| VDAG_JR2_Chr8g02280a | Vitamin H transporter 1                                                                      | Non-vesicular cellular import | 1.44                           |
| VDAG_JR2_Chr8g02900a | Putative uncharacterized protein                                                             | Non-vesicular cellular import | 2.18                           |
| VDAG_JR2_Chr8g07670a | Maltose permease MAL31                                                                       | Non-vesicular cellular import | 1.64                           |
| VDAG_JR2_Chr8g10170a | Siderophore iron transporter mirB                                                            | Non-vesicular cellular import | 2.25                           |
| VDAG_JR2_Chr8g11110a | Allantoate permease                                                                          | Non-vesicular cellular import | 1.96                           |
| VDAG_JR2_Chr1g02780a | Endoglucanase-5                                                                              | Polysaccharide metabolism     | 2.14                           |
| VDAG_JR2_Chr1g06240a | Beta-glucosidase                                                                             | Polysaccharide metabolism     | 4.43                           |
| VDAG_JR2_Chr1g06940a | Beta-glucanase                                                                               | Polysaccharide metabolism     | 1.36                           |
| VDAG_JR2_Chr1g17290a | Alpha-galactosidase (EC 3.2.1.22) (Melibiase)                                                | Polysaccharide metabolism     | 1.10                           |
| VDAG_JR2_Chr1g18230a | Glucoamylase (EC 3.2.1.3) (1,4-alpha-D-glucan glucohydrolase) (Glucan 1,4-alpha-glucosidase) | Polysaccharide metabolism     | 1.40                           |
| VDAG_JR2_Chr1g21910a | Glucanase (EC 3.2.1.-)                                                                       | Polysaccharide metabolism     | 3.79                           |
| VDAG_JR2_Chr1g22490a | Acetylxyln esterase                                                                          | Polysaccharide metabolism     | 1.39                           |
| VDAG_JR2_Chr1g22690a | Endo alpha-1,4 polygalactosaminidase precursor                                               | Polysaccharide metabolism     | 1.18                           |
| VDAG_JR2_Chr1g22740a | Endoglucanase-4                                                                              | Polysaccharide metabolism     | 1.39                           |
| VDAG_JR2_Chr1g24130a | Polygalacturonase                                                                            | Polysaccharide metabolism     | 1.98                           |
| VDAG_JR2_Chr1g25020a | Glucanase (EC 3.2.1.-)                                                                       | Polysaccharide metabolism     | 1.04                           |
| VDAG_JR2_Chr1g25430a | Acetylxyln esterase                                                                          | Polysaccharide metabolism     | 2.29                           |
| VDAG_JR2_Chr1g26170a | Putative uncharacterized protein                                                             | Polysaccharide metabolism     | 1.22                           |
| VDAG_JR2_Chr1g27290a | Beta-galactosidase                                                                           | Polysaccharide metabolism     | 1.44                           |
| VDAG_JR2_Chr1g28060a | Glucan 1,3-beta-glucosidase                                                                  | Polysaccharide metabolism     | 2.38                           |
| VDAG_JR2_Chr1g28970a | Alpha-galactosidase (EC 3.2.1.22) (Melibiase)                                                | Polysaccharide metabolism     | 2.20                           |

| Gene identifier      | Protein name                                                                                 | FunCat description        | log <sub>2</sub> (fold change) |
|----------------------|----------------------------------------------------------------------------------------------|---------------------------|--------------------------------|
| VDAG_JR2_Chr1g29680a | Glucan 1,3-beta-glucosidase                                                                  | Polysaccharide metabolism | 1.95                           |
| VDAG_JR2_Chr2g00430a | Pectate lyase                                                                                | Polysaccharide metabolism | 2.89                           |
| VDAG_JR2_Chr2g00660a | Glucanase (EC 3.2.1.-)                                                                       | Polysaccharide metabolism | 1.67                           |
| VDAG_JR2_Chr2g00910a | Beta-galactosidase                                                                           | Polysaccharide metabolism | 1.68                           |
| VDAG_JR2_Chr2g01760a | Putative uncharacterized protein                                                             | Polysaccharide metabolism | 1.44                           |
| VDAG_JR2_Chr2g02280a | Chitin deacetylase                                                                           | Polysaccharide metabolism | 1.07                           |
| VDAG_JR2_Chr2g05870a | Glucoamylase (EC 3.2.1.3) (1,4-alpha-D-glucan glucohydrolase) (Glucan 1,4-alpha-glucosidase) | Polysaccharide metabolism | 1.49                           |
| VDAG_JR2_Chr2g06830a | Xylosidase/arabinosidase                                                                     | Polysaccharide metabolism | 1.04                           |
| VDAG_JR2_Chr2g13290a | Pectate lyase D                                                                              | Polysaccharide metabolism | 1.97                           |
| VDAG_JR2_Chr3g02150a | Chitinase                                                                                    | Polysaccharide metabolism | 1.17                           |
| VDAG_JR2_Chr3g03460a | Alpha-mannosidase                                                                            | Polysaccharide metabolism | 1.12                           |
| VDAG_JR2_Chr3g05640a | Glucan endo-1,3-alpha-glucosidase agn1                                                       | Polysaccharide metabolism | 1.15                           |
| VDAG_JR2_Chr3g10320a | Beta-hexosaminidase                                                                          | Polysaccharide metabolism | 1.47                           |
| VDAG_JR2_Chr3g10580a | Glycosyl hydrolases family 32 superfamily                                                    | Polysaccharide metabolism | 2.43                           |
| VDAG_JR2_Chr3g12270a | Chitin synthase                                                                              | Polysaccharide metabolism | 1.62                           |
| VDAG_JR2_Chr3g12280a | UDP-glucose 6-dehydrogenase (EC 1.1.1.22)                                                    | Polysaccharide metabolism | 1.18                           |
| VDAG_JR2_Chr3g12300a | Pectate lyase                                                                                | Polysaccharide metabolism | 2.07                           |
| VDAG_JR2_Chr3g12360a | Cellobiose dehydrogenase                                                                     | Polysaccharide metabolism | 2.27                           |
| VDAG_JR2_Chr4g00350a | Polysaccharide deacetylase family protein                                                    | Polysaccharide metabolism | 1.13                           |
| VDAG_JR2_Chr4g11100a | Mannan endo-1,4-beta-mannosidase                                                             | Polysaccharide metabolism | 1.40                           |
| VDAG_JR2_Chr4g11890a | Glucanase (EC 3.2.1.-)                                                                       | Polysaccharide metabolism | 1.66                           |
| VDAG_JR2_Chr5g03220a | Alpha-galactosidase (EC 3.2.1.22) (Melibiase)                                                | Polysaccharide metabolism | 1.53                           |
| VDAG_JR2_Chr5g04120a | Cel74a                                                                                       | Polysaccharide metabolism | 1.76                           |
| VDAG_JR2_Chr5g04180a | Thermostable beta-glucosidase B                                                              | Polysaccharide metabolism | 2.48                           |
| VDAG_JR2_Chr5g05890a | Glycosyl hydrolase family 43 protein                                                         | Polysaccharide metabolism | 2.37                           |

| Gene identifier      | Protein name                                                         | FunCat description        | log <sub>2</sub> (fold change) |
|----------------------|----------------------------------------------------------------------|---------------------------|--------------------------------|
| VDAG_JR2_Chr5g06020a | Exostosin-2                                                          | Polysaccharide metabolism | 1.25                           |
| VDAG_JR2_Chr5g09380a | Endoglucanase II                                                     | Polysaccharide metabolism | 4.18                           |
| VDAG_JR2_Chr5g09890a | Chitin deacetylase                                                   | Polysaccharide metabolism | 1.58                           |
| VDAG_JR2_Chr6g00450a | Glucan 1,3-beta-glucosidase                                          | Polysaccharide metabolism | 1.83                           |
| VDAG_JR2_Chr6g04060a | Beta-fructofuranosidase                                              | Polysaccharide metabolism | 1.28                           |
| VDAG_JR2_Chr6g10890a | Putative uncharacterized protein                                     | Polysaccharide metabolism | 2.46                           |
| VDAG_JR2_Chr7g00075a | Beta-glucosidase                                                     | Polysaccharide metabolism | 5.24                           |
| VDAG_JR2_Chr7g00310a | Glucanase (EC 3.2.1.-)                                               | Polysaccharide metabolism | 1.54                           |
| VDAG_JR2_Chr7g01140a | Beta-xylosidase                                                      | Polysaccharide metabolism | 1.89                           |
| VDAG_JR2_Chr7g02610a | Putative uncharacterized protein                                     | Polysaccharide metabolism | 1.74                           |
| VDAG_JR2_Chr7g03350a | Exo-rhamnogalacturonase B                                            | Polysaccharide metabolism | 1.10                           |
| VDAG_JR2_Chr7g03570a | Cellobiose dehydrogenase                                             | Polysaccharide metabolism | 1.03                           |
| VDAG_JR2_Chr7g05780a | Putative uncharacterized protein                                     | Polysaccharide metabolism | 1.75                           |
| VDAG_JR2_Chr7g09240a | Pectate lyase A                                                      | Polysaccharide metabolism | 1.50                           |
| VDAG_JR2_Chr8g00600a | Thermostable beta-glucosidase B                                      | Polysaccharide metabolism | 1.03                           |
| VDAG_JR2_Chr8g01010a | Endoplasmic reticulum mannosyl-oligosaccharide 1,2-alpha-mannosidase | Polysaccharide metabolism | 1.71                           |
| VDAG_JR2_Chr8g02840a | Chitin synthase                                                      | Polysaccharide metabolism | 1.19                           |
| VDAG_JR2_Chr8g07660a | Alpha-galactosidase (EC 3.2.1.22) (Melibiase)                        | Polysaccharide metabolism | 1.15                           |
| VDAG_JR2_Chr8g09390a | Beta-xylanase (EC 3.2.1.8)                                           | Polysaccharide metabolism | 4.22                           |
| VDAG_JR2_Chr8g10500a | Glucanase (EC 3.2.1.-)                                               | Polysaccharide metabolism | 1.07                           |
| VDAG_JR2_Chr1g01080a | Maltose permease                                                     | Proton driven symporter   | 2.77                           |
| VDAG_JR2_Chr1g05760a | Galactose-proton symporter                                           | Proton driven symporter   | 1.70                           |
| VDAG_JR2_Chr1g12250a | Choline transport protein                                            | Proton driven symporter   | 1.50                           |
| VDAG_JR2_Chr2g08880a | Maltose permease MAL31                                               | Proton driven symporter   | 1.34                           |
| VDAG_JR2_Chr2g12320a | General alpha-glucoside permease                                     | Proton driven symporter   | 1.43                           |
| VDAG_JR2_Chr3g01050a | Membrane transporter D1                                              | Proton driven symporter   | 1.34                           |
| VDAG_JR2_Chr3g10590a | General alpha-glucoside permease                                     | Proton driven symporter   | 1.66                           |

| Gene identifier      | Protein name                               | FunCat description      | log <sub>2</sub> (fold change) |
|----------------------|--------------------------------------------|-------------------------|--------------------------------|
| VDAG_JR2_Chr3g12560a | Maltose permease MAL31                     | Proton driven symporter | 1.21                           |
| VDAG_JR2_Chr3g12900a | Alpha-glucosides permease MPH2/3           | Proton driven symporter | 1.08                           |
| VDAG_JR2_Chr4g06500a | Proton myo-inositol cotransporter          | Proton driven symporter | 1.73                           |
| VDAG_JR2_Chr5g03240a | Maltose permease MAL31                     | Proton driven symporter | 1.20                           |
| VDAG_JR2_Chr6g08800a | General alpha-glucoside permease           | Proton driven symporter | 3.19                           |
| VDAG_JR2_Chr7g07610a | Choline transport protein                  | Proton driven symporter | 1.12                           |
| VDAG_JR2_Chr7g10440a | Sodium/nucleoside cotransporter            | Proton driven symporter | 1.21                           |
| VDAG_JR2_Chr8g01390a | Maltose permease MAL31                     | Proton driven symporter | 3.28                           |
| VDAG_JR2_Chr8g07670a | Maltose permease MAL31                     | Proton driven symporter | 1.64                           |
| VDAG_JR2_Chr1g00310a | ATP-binding cassette sub-family G member 2 | Secondary metabolism    | 1.11                           |
| VDAG_JR2_Chr1g01080a | Maltose permease                           | Secondary metabolism    | 2.77                           |
| VDAG_JR2_Chr1g01185a | Hexose transporter                         | Secondary metabolism    | 1.51                           |
| VDAG_JR2_Chr1g01440a | Sugar transporter                          | Secondary metabolism    | 1.62                           |
| VDAG_JR2_Chr1g01910a | Putative uncharacterized protein           | Secondary metabolism    | 2.28                           |
| VDAG_JR2_Chr1g03120a | SERAC1 protein                             | Secondary metabolism    | 1.32                           |
| VDAG_JR2_Chr1g04380a | Putative uncharacterized protein           | Secondary metabolism    | 1.03                           |
| VDAG_JR2_Chr1g05030a | Ferric-chelate reductase                   | Secondary metabolism    | 1.93                           |
| VDAG_JR2_Chr1g05330a | Cytochrome P450                            | Secondary metabolism    | 1.50                           |
| VDAG_JR2_Chr1g05350a | Putative uncharacterized protein           | Secondary metabolism    | 2.84                           |
| VDAG_JR2_Chr1g05360a | 4-coumarate-CoA ligase                     | Secondary metabolism    | 1.52                           |
| VDAG_JR2_Chr1g05390a | Aldehyde dehydrogenase                     | Secondary metabolism    | 4.23                           |
| VDAG_JR2_Chr1g05400a | Ankyrin repeat protein                     | Secondary metabolism    | 5.15                           |
| VDAG_JR2_Chr1g05420a | Putative uncharacterized protein           | Secondary metabolism    | 8.43                           |
| VDAG_JR2_Chr1g05480a | Putative uncharacterized protein           | Secondary metabolism    | 1.92                           |
| VDAG_JR2_Chr1g05500a | 3-oxoacyl-[acyl-carrier-protein] reductase | Secondary metabolism    | 1.17                           |
| VDAG_JR2_Chr1g06490a | L-amino acid oxidase                       | Secondary metabolism    | 2.38                           |
| VDAG_JR2_Chr1g08670a | Putative uncharacterized protein           | Secondary metabolism    | 1.12                           |
| VDAG_JR2_Chr1g08876a | FAD binding domain-containing protein      | Secondary metabolism    | 1.12                           |

| Gene identifier      | Protein name                                                                                 | FunCat description   | log <sub>2</sub> (fold change) |
|----------------------|----------------------------------------------------------------------------------------------|----------------------|--------------------------------|
| VDAG_JR2_Chr1g11700a | Amino acid transporter                                                                       | Secondary metabolism | 1.11                           |
| VDAG_JR2_Chr1g12250a | Choline transport protein                                                                    | Secondary metabolism | 1.50                           |
| VDAG_JR2_Chr1g13480a | Translation initiation factor eIF-2B subunit family protein                                  | Secondary metabolism | 1.54                           |
| VDAG_JR2_Chr1g14080a | Putative uncharacterized protein                                                             | Secondary metabolism | 2.22                           |
| VDAG_JR2_Chr1g14630a | C6 zinc finger domain-containing protein                                                     | Secondary metabolism | 2.29                           |
| VDAG_JR2_Chr1g15480a | Putative uncharacterized protein                                                             | Secondary metabolism | 1.40                           |
| VDAG_JR2_Chr1g15850a | ABC transporter CDR4                                                                         | Secondary metabolism | 1.22                           |
| VDAG_JR2_Chr1g15970a | Amine oxidase                                                                                | Secondary metabolism | 1.07                           |
| VDAG_JR2_Chr1g16560a | Putative uncharacterized protein                                                             | Secondary metabolism | 1.22                           |
| VDAG_JR2_Chr1g17030a | Transcriptional activator protein acu-15                                                     | Secondary metabolism | 1.94                           |
| VDAG_JR2_Chr1g18230a | Glucoamylase (EC 3.2.1.3) (1,4-alpha-D-glucan glucohydrolase) (Glucan 1,4-alpha-glucosidase) | Secondary metabolism | 1.40                           |
| VDAG_JR2_Chr1g18480a | C6 zinc finger domain-containing protein                                                     | Secondary metabolism | 1.89                           |
| VDAG_JR2_Chr1g18490a | Putative uncharacterized protein                                                             | Secondary metabolism | 1.69                           |
| VDAG_JR2_Chr1g19870a | STB5 protein                                                                                 | Secondary metabolism | 1.84                           |
| VDAG_JR2_Chr1g21550a | Methyltransferase                                                                            | Secondary metabolism | 1.04                           |
| VDAG_JR2_Chr1g22050a | Sugar transporter STL1                                                                       | Secondary metabolism | 2.06                           |
| VDAG_JR2_Chr1g22840a | Putative uncharacterized protein                                                             | Secondary metabolism | 1.56                           |
| VDAG_JR2_Chr1g23310a | Putative uncharacterized protein                                                             | Secondary metabolism | 1.30                           |
| VDAG_JR2_Chr1g23860a | Putative uncharacterized protein                                                             | Secondary metabolism | 2.55                           |
| VDAG_JR2_Chr1g23870a | Integral membrane protein                                                                    | Secondary metabolism | 2.52                           |
| VDAG_JR2_Chr1g24120a | MAS1 protein                                                                                 | Secondary metabolism | 1.10                           |
| VDAG_JR2_Chr1g24520a | Sugar transporter                                                                            | Secondary metabolism | 1.70                           |
| VDAG_JR2_Chr1g24600a | 4-hydroxyacetophenone monooxygenase                                                          | Secondary metabolism | 3.30                           |
| VDAG_JR2_Chr1g24800a | Ent-kaurene oxidase                                                                          | Secondary metabolism | 1.37                           |
| VDAG_JR2_Chr1g25900a | Amino acid transporter                                                                       | Secondary metabolism | 1.42                           |
| VDAG_JR2_Chr1g26000a | Putative uncharacterized protein                                                             | Secondary metabolism | 1.35                           |

| Gene identifier      | Protein name                                                                                 | FunCat description   | log <sub>2</sub> (fold change) |
|----------------------|----------------------------------------------------------------------------------------------|----------------------|--------------------------------|
| VDAG_JR2_Chr1g26520a | Cutinase transcription factor 1 alpha                                                        | Secondary metabolism | 1.74                           |
| VDAG_JR2_Chr1g26890a | Pleiotropic ABC multiple drug efflux transporter                                             | Secondary metabolism | 1.07                           |
| VDAG_JR2_Chr1g27940a | Polyamine oxidase                                                                            | Secondary metabolism | 1.31                           |
| VDAG_JR2_Chr1g28170a | Putative uncharacterized protein                                                             | Secondary metabolism | 1.50                           |
| VDAG_JR2_Chr1g28200a | Putative uncharacterized protein                                                             | Secondary metabolism | 1.29                           |
| VDAG_JR2_Chr1g28970a | Alpha-galactosidase (EC 3.2.1.22) (Melibiase)                                                | Secondary metabolism | 2.20                           |
| VDAG_JR2_Chr1g29400a | NACHT and WD domain-containing protein                                                       | Secondary metabolism | 1.58                           |
| VDAG_JR2_Chr2g02210a | Fungal specific transcription factor domain-containing protein                               | Secondary metabolism | 1.35                           |
| VDAG_JR2_Chr2g02540a | Pantothenate transporter liz1                                                                | Secondary metabolism | 7.40                           |
| VDAG_JR2_Chr2g04160a | 4-coumarate-CoA ligase                                                                       | Secondary metabolism | 2.58                           |
| VDAG_JR2_Chr2g05230a | Putative uncharacterized protein                                                             | Secondary metabolism | 1.92                           |
| VDAG_JR2_Chr2g05870a | Glucoamylase (EC 3.2.1.3) (1,4-alpha-D-glucan glucohydrolase) (Glucan 1,4-alpha-glucosidase) | Secondary metabolism | 1.49                           |
| VDAG_JR2_Chr2g06830a | Xylosidase/arabinosidase                                                                     | Secondary metabolism | 1.04                           |
| VDAG_JR2_Chr2g07210a | DUF341 domain-containing protein                                                             | Secondary metabolism | 1.61                           |
| VDAG_JR2_Chr2g09270a | Putative uncharacterized protein                                                             | Secondary metabolism | 1.25                           |
| VDAG_JR2_Chr2g10500a | Methyltransferase                                                                            | Secondary metabolism | 1.30                           |
| VDAG_JR2_Chr2g11750a | UMTA protein                                                                                 | Secondary metabolism | 2.00                           |
| VDAG_JR2_Chr2g12010a | Trichothecene efflux pump                                                                    | Secondary metabolism | 3.01                           |
| VDAG_JR2_Chr2g12320a | General alpha-glucoside permease                                                             | Secondary metabolism | 1.43                           |
| VDAG_JR2_Chr2g12790a | FAD binding domain-containing protein                                                        | Secondary metabolism | 2.69                           |
| VDAG_JR2_Chr2g12840a | Homoprotocatechuate catabolism bifunctional isomerase/decarboxylase                          | Secondary metabolism | 1.51                           |
| VDAG_JR2_Chr2g13170a | Putative uncharacterized protein                                                             | Secondary metabolism | 1.08                           |

| Gene identifier      | Protein name                                   | FunCat description   | log <sub>2</sub> (fold change) |
|----------------------|------------------------------------------------|----------------------|--------------------------------|
| VDAG_JR2_Chr2g13190a | Voltage-gated potassium channel subunit beta-3 | Secondary metabolism | 1.20                           |
| VDAG_JR2_Chr2g13240a | Choline dehydrogenase                          | Secondary metabolism | 4.55                           |
| VDAG_JR2_Chr3g01490a | Cytochrome P450 52A11                          | Secondary metabolism | 1.27                           |
| VDAG_JR2_Chr3g02480a | IBR domain-containing protein                  | Secondary metabolism | 1.56                           |
| VDAG_JR2_Chr3g03230a | 4-coumarate-CoA ligase                         | Secondary metabolism | 1.49                           |
| VDAG_JR2_Chr3g05030a | Phenol 2-monooxygenase                         | Secondary metabolism | 1.58                           |
| VDAG_JR2_Chr3g05040a | Cytochrome P450 71B28                          | Secondary metabolism | 1.47                           |
| VDAG_JR2_Chr3g06490a | C6 zinc finger domain-containing protein       | Secondary metabolism | 1.89                           |
| VDAG_JR2_Chr3g09580a | Putative uncharacterized protein               | Secondary metabolism | 1.29                           |
| VDAG_JR2_Chr3g10430a | Lactose permease                               | Secondary metabolism | 4.55                           |
| VDAG_JR2_Chr3g10460a | Putative uncharacterized protein               | Secondary metabolism | 1.74                           |
| VDAG_JR2_Chr3g11570a | Protein kinase domain-containing protein       | Secondary metabolism | 2.02                           |
| VDAG_JR2_Chr3g11590a | Monooxygenase                                  | Secondary metabolism | 5.17                           |
| VDAG_JR2_Chr3g11930a | Putative uncharacterized protein               | Secondary metabolism | 1.04                           |
| VDAG_JR2_Chr3g12360a | Cellobiose dehydrogenase                       | Secondary metabolism | 2.27                           |
| VDAG_JR2_Chr3g12800a | Putative uncharacterized protein               | Secondary metabolism | 1.71                           |
| VDAG_JR2_Chr3g12810a | FAD binding domain-containing protein          | Secondary metabolism | 1.55                           |
| VDAG_JR2_Chr3g12900a | Alpha-glucosides permease MPH2/3               | Secondary metabolism | 1.08                           |
| VDAG_JR2_Chr3g13250a | L-ornithine 5-monooxygenase                    | Secondary metabolism | 1.64                           |
| VDAG_JR2_Chr3g13290a | Diacylglycerol pyrophosphate phosphatase       | Secondary metabolism | 1.17                           |
| VDAG_JR2_Chr4g00210a | Bilirubin oxidase                              | Secondary metabolism | 6.21                           |
| VDAG_JR2_Chr4g00490a | Bifunctional P-450:NADPH-P450 reductase        | Secondary metabolism | 2.42                           |
| VDAG_JR2_Chr4g00820a | Putative uncharacterized protein               | Secondary metabolism | 1.31                           |
| VDAG_JR2_Chr4g00850a | Putative uncharacterized protein               | Secondary metabolism | 2.49                           |
| VDAG_JR2_Chr4g01210a | Acetamidase                                    | Secondary metabolism | 1.40                           |
| VDAG_JR2_Chr4g01490a | Putative uncharacterized protein               | Secondary metabolism | 1.19                           |

| Gene identifier      | Protein name                                           | FunCat description   | log <sub>2</sub> (fold change) |
|----------------------|--------------------------------------------------------|----------------------|--------------------------------|
| VDAG_JR2_Chr4g01630a | Aerobactin siderophore biosynthesis protein iucB       | Secondary metabolism | 3.37                           |
| VDAG_JR2_Chr4g01750a | Sugar transporter                                      | Secondary metabolism | 1.33                           |
| VDAG_JR2_Chr4g02590a | Cytochrome P450 52A11                                  | Secondary metabolism | 1.46                           |
| VDAG_JR2_Chr4g03030a | Bifunctional P-450:NADPH-P450 reductase                | Secondary metabolism | 1.69                           |
| VDAG_JR2_Chr4g04410a | Putative uncharacterized protein                       | Secondary metabolism | 1.70                           |
| VDAG_JR2_Chr4g04640a | Aromatic and neutral aliphatic amino acid permease     | Secondary metabolism | 1.06                           |
| VDAG_JR2_Chr4g04720a | Proline-specific permease                              | Secondary metabolism | 1.18                           |
| VDAG_JR2_Chr4g04880a | Putative uncharacterized protein                       | Secondary metabolism | 1.44                           |
| VDAG_JR2_Chr4g05020a | Lactose regulatory protein LAC9                        | Secondary metabolism | 1.25                           |
| VDAG_JR2_Chr4g05150a | Putative uncharacterized protein                       | Secondary metabolism | 1.10                           |
| VDAG_JR2_Chr4g05480a | Lipase/esterase                                        | Secondary metabolism | 4.16                           |
| VDAG_JR2_Chr4g05940a | Alpha-glucosides permease MPH2/3                       | Secondary metabolism | 4.31                           |
| VDAG_JR2_Chr4g07460a | FAD binding domain-containing protein                  | Secondary metabolism | 1.27                           |
| VDAG_JR2_Chr4g10580a | Putative uncharacterized protein                       | Secondary metabolism | 1.85                           |
| VDAG_JR2_Chr4g10620a | Salicylate hydroxylase                                 | Secondary metabolism | 3.47                           |
| VDAG_JR2_Chr4g10700a | Pisatin demethylase                                    | Secondary metabolism | 2.48                           |
| VDAG_JR2_Chr4g10730a | Stress responsive A/B barrel domain-containing protein | Secondary metabolism | 2.96                           |
| VDAG_JR2_Chr4g10760a | Choline transport protein                              | Secondary metabolism | 4.55                           |
| VDAG_JR2_Chr4g10770a | Amine oxidase                                          | Secondary metabolism | 3.27                           |
| VDAG_JR2_Chr4g10780a | Cytochrome P450 76A2                                   | Secondary metabolism | 4.85                           |
| VDAG_JR2_Chr4g10900a | Vitamin H transporter                                  | Secondary metabolism | 3.04                           |
| VDAG_JR2_Chr4g10990a | Sulphydryl oxidase                                     | Secondary metabolism | 1.48                           |
| VDAG_JR2_Chr4g11460a | Amino acid transporter                                 | Secondary metabolism | 1.47                           |
| VDAG_JR2_Chr4g11570a | Metalloreductase                                       | Secondary metabolism | 1.15                           |
| VDAG_JR2_Chr4g11940a | Alpha/beta hydrolase                                   | Secondary metabolism | 1.51                           |

| Gene identifier      | Protein name                            | FunCat description   | log <sub>2</sub> (fold change) |
|----------------------|-----------------------------------------|----------------------|--------------------------------|
| VDAG_JR2_Chr4g12400a | Oxidoreductase                          | Secondary metabolism | 3.07                           |
| VDAG_JR2_Chr5g00030a | Putative uncharacterized protein        | Secondary metabolism | 1.13                           |
| VDAG_JR2_Chr5g00050a | Salicylate hydroxylase                  | Secondary metabolism | 2.02                           |
| VDAG_JR2_Chr5g00060a | Aldehyde dehydrogenase                  | Secondary metabolism | 3.15                           |
| VDAG_JR2_Chr5g00190a | Glucose transporter                     | Secondary metabolism | 1.09                           |
| VDAG_JR2_Chr5g00860a | Glucose oxidase                         | Secondary metabolism | 1.39                           |
| VDAG_JR2_Chr5g00970a | Choline monooxygenase                   | Secondary metabolism | 1.93                           |
| VDAG_JR2_Chr5g01240a | Benomyl/methotrexate resistance protein | Secondary metabolism | 2.29                           |
| VDAG_JR2_Chr5g01310a | C6 zinc finger protein                  | Secondary metabolism | 1.10                           |
| VDAG_JR2_Chr5g03740a | Lactose permease                        | Secondary metabolism | 1.89                           |
| VDAG_JR2_Chr5g04160a | Proton myo-inositol cotransporter       | Secondary metabolism | 2.51                           |
| VDAG_JR2_Chr5g04590a | Mannan endo-1,6-alpha-mannosidase DCW1  | Secondary metabolism | 1.77                           |
| VDAG_JR2_Chr5g05090a | Putative uncharacterized protein        | Secondary metabolism | 1.61                           |
| VDAG_JR2_Chr5g05100a | Quinate permease                        | Secondary metabolism | 1.56                           |
| VDAG_JR2_Chr5g06930a | Choline transport protein               | Secondary metabolism | 4.08                           |
| VDAG_JR2_Chr5g06940a | Monoamine oxidase N                     | Secondary metabolism | 4.95                           |
| VDAG_JR2_Chr5g08280a | Zinc finger transcription factor 1      | Secondary metabolism | 1.35                           |
| VDAG_JR2_Chr5g10570a | Ankyrin repeat protein                  | Secondary metabolism | 1.94                           |
| VDAG_JR2_Chr5g11040a | Alcohol oxidase                         | Secondary metabolism | 3.50                           |
| VDAG_JR2_Chr5g11880a | Choline dehydrogenase                   | Secondary metabolism | 1.24                           |
| VDAG_JR2_Chr6g01130a | FAD binding domain-containing protein   | Secondary metabolism | 5.17                           |
| VDAG_JR2_Chr6g01280a | Thymine dioxygenase                     | Secondary metabolism | 1.95                           |
| VDAG_JR2_Chr6g01290a | Lactose permease                        | Secondary metabolism | 1.17                           |
| VDAG_JR2_Chr6g01850a | Putative uncharacterized protein        | Secondary metabolism | 1.22                           |
| VDAG_JR2_Chr6g02300a | Choline dehydrogenase                   | Secondary metabolism | 2.31                           |
| VDAG_JR2_Chr6g04210a | Siderophore iron transporter mirB       | Secondary metabolism | 1.70                           |
| VDAG_JR2_Chr6g05120a | Putative uncharacterized protein        | Secondary metabolism | 1.38                           |
| VDAG_JR2_Chr6g05300a | Putative uncharacterized protein        | Secondary metabolism | 1.80                           |

| Gene identifier      | Protein name                                       | FunCat description   | log <sub>2</sub> (fold change) |
|----------------------|----------------------------------------------------|----------------------|--------------------------------|
| VDAG_JR2_Chr6g05470a | Short chain dehydrogenase                          | Secondary metabolism | 1.20                           |
| VDAG_JR2_Chr6g05780a | Cyclopentanone 1,2-monooxygenase                   | Secondary metabolism | 2.13                           |
| VDAG_JR2_Chr6g06030a | Averantin oxidoreductase                           | Secondary metabolism | 1.57                           |
| VDAG_JR2_Chr6g06060a | 4-trimethylaminobutyraldehyde dehydrogenase        | Secondary metabolism | 1.39                           |
| VDAG_JR2_Chr6g08410a | Putative uncharacterized protein                   | Secondary metabolism | 2.00                           |
| VDAG_JR2_Chr6g08420a | Amine oxidase B                                    | Secondary metabolism | 1.26                           |
| VDAG_JR2_Chr6g08610a | Phenylacetone monooxygenase                        | Secondary metabolism | 1.13                           |
| VDAG_JR2_Chr6g08800a | General alpha-glucoside permease                   | Secondary metabolism | 3.19                           |
| VDAG_JR2_Chr6g09100a | Putative uncharacterized protein                   | Secondary metabolism | 1.69                           |
| VDAG_JR2_Chr6g09120a | Aromatic and neutral aliphatic amino acid permease | Secondary metabolism | 1.11                           |
| VDAG_JR2_Chr6g09680a | Alcohol oxidase                                    | Secondary metabolism | 1.47                           |
| VDAG_JR2_Chr6g09710a | Quinate permease                                   | Secondary metabolism | 1.04                           |
| VDAG_JR2_Chr6g10160a | Acetylesterase                                     | Secondary metabolism | 1.79                           |
| VDAG_JR2_Chr6g10890a | Putative uncharacterized protein                   | Secondary metabolism | 2.46                           |
| VDAG_JR2_Chr7g00700a | Putative uncharacterized protein                   | Secondary metabolism | 1.18                           |
| VDAG_JR2_Chr7g01150a | Putative uncharacterized protein                   | Secondary metabolism | 1.20                           |
| VDAG_JR2_Chr7g02910a | Putative uncharacterized protein                   | Secondary metabolism | 1.07                           |
| VDAG_JR2_Chr7g03180a | FMP42 protein                                      | Secondary metabolism | 4.22                           |
| VDAG_JR2_Chr7g03200a | Putative uncharacterized protein                   | Secondary metabolism | 2.41                           |
| VDAG_JR2_Chr7g03570a | Cellobiose dehydrogenase                           | Secondary metabolism | 1.03                           |
| VDAG_JR2_Chr7g03610a | Riboflavin transporter MCH5                        | Secondary metabolism | 2.36                           |
| VDAG_JR2_Chr7g05220a | TOL protein                                        | Secondary metabolism | 1.41                           |
| VDAG_JR2_Chr7g05440a | Beta,beta-carotene 9',10'-dioxygenase              | Secondary metabolism | 1.42                           |
| VDAG_JR2_Chr7g05450a | Averantin oxidoreductase                           | Secondary metabolism | 1.72                           |
| VDAG_JR2_Chr7g07610a | Choline transport protein                          | Secondary metabolism | 1.12                           |
| VDAG_JR2_Chr7g08060a | Putative uncharacterized protein                   | Secondary metabolism | 2.03                           |
| VDAG_JR2_Chr7g09570a | Sugar transporter                                  | Secondary metabolism | 1.01                           |

| Gene identifier      | Protein name                            | FunCat description   | log <sub>2</sub> (fold change) |
|----------------------|-----------------------------------------|----------------------|--------------------------------|
| VDAG_JR2_Chr7g10250a | Putative uncharacterized protein        | Secondary metabolism | 1.63                           |
| VDAG_JR2_Chr8g00630a | Fluconazole resistance protein          | Secondary metabolism | 3.15                           |
| VDAG_JR2_Chr8g00880a | Lactose permease                        | Secondary metabolism | 1.88                           |
| VDAG_JR2_Chr8g00990a | Sugar transporter                       | Secondary metabolism | 2.49                           |
| VDAG_JR2_Chr8g01050a | Phthalate transporter                   | Secondary metabolism | 1.36                           |
| VDAG_JR2_Chr8g01500a | Putative uncharacterized protein        | Secondary metabolism | 1.48                           |
| VDAG_JR2_Chr8g01610a | Maleylacetate reductase                 | Secondary metabolism | 2.27                           |
| VDAG_JR2_Chr8g01660a | Putative uncharacterized protein        | Secondary metabolism | 2.93                           |
| VDAG_JR2_Chr8g02120a | Aldehyde dehydrogenase                  | Secondary metabolism | 1.11                           |
| VDAG_JR2_Chr8g02280a | Vitamin H transporter 1                 | Secondary metabolism | 1.44                           |
| VDAG_JR2_Chr8g02900a | Putative uncharacterized protein        | Secondary metabolism | 2.18                           |
| VDAG_JR2_Chr8g07670a | Maltose permease MAL31                  | Secondary metabolism | 1.64                           |
| VDAG_JR2_Chr8g08860a | Gibberellin 20 oxidase                  | Secondary metabolism | 1.39                           |
| VDAG_JR2_Chr8g09050a | Averantin oxidoreductase                | Secondary metabolism | 7.72                           |
| VDAG_JR2_Chr8g09440a | Putative uncharacterized protein        | Secondary metabolism | 1.48                           |
| VDAG_JR2_Chr8g10170a | Siderophore iron transporter mirB       | Secondary metabolism | 2.25                           |
| VDAG_JR2_Chr8g10320a | Putative uncharacterized protein        | Secondary metabolism | 2.99                           |
| VDAG_JR2_Chr8g10350a | Phthalate transporter                   | Secondary metabolism | 3.85                           |
| VDAG_JR2_Chr8g11120a | Integral membrane protein               | Secondary metabolism | 2.51                           |
| VDAG_JR2_Chr1g00390a | Iron transport multicopper oxidase FET3 | Transport facilities | 4.06                           |
| VDAG_JR2_Chr1g00400a | Plasma membrane iron permease           | Transport facilities | 2.03                           |
| VDAG_JR2_Chr1g01070a | Putative uncharacterized protein        | Transport facilities | 4.75                           |
| VDAG_JR2_Chr1g01080a | Maltose permease                        | Transport facilities | 2.77                           |
| VDAG_JR2_Chr1g01185a | Hexose transporter                      | Transport facilities | 1.51                           |
| VDAG_JR2_Chr1g01330a | NADH-cytochrome b5 reductase            | Transport facilities | 1.13                           |
| VDAG_JR2_Chr1g01440a | Sugar transporter                       | Transport facilities | 1.62                           |
| VDAG_JR2_Chr1g01710a | Inner membrane transport protein yfaV   | Transport facilities | 1.52                           |
| VDAG_JR2_Chr1g02220a | Sugar transporter                       | Transport facilities | 2.06                           |
| VDAG_JR2_Chr1g05010a | Peptide transporter PTR2                | Transport facilities | 3.23                           |

| Gene identifier      | Protein name                             | FunCat description   | log <sub>2</sub> (fold change) |
|----------------------|------------------------------------------|----------------------|--------------------------------|
| VDAG_JR2_Chr1g05760a | Galactose-proton symporter               | Transport facilities | 1.70                           |
| VDAG_JR2_Chr1g08890a | Putative uncharacterized protein         | Transport facilities | 1.29                           |
| VDAG_JR2_Chr1g10700a | Solute carrier family 12 member 6        | Transport facilities | 2.26                           |
| VDAG_JR2_Chr1g11690a | Putative uncharacterized protein         | Transport facilities | 1.34                           |
| VDAG_JR2_Chr1g12250a | Choline transport protein                | Transport facilities | 1.50                           |
| VDAG_JR2_Chr1g15370a | Putative uncharacterized protein         | Transport facilities | 1.59                           |
| VDAG_JR2_Chr1g18850a | Putative uncharacterized protein         | Transport facilities | 1.14                           |
| VDAG_JR2_Chr1g22050a | Sugar transporter STL1                   | Transport facilities | 2.06                           |
| VDAG_JR2_Chr1g22590a | Vacuolar calcium ion transporter         | Transport facilities | 3.81                           |
| VDAG_JR2_Chr1g23370a | Aquaporin-2                              | Transport facilities | 3.31                           |
| VDAG_JR2_Chr1g24520a | Sugar transporter                        | Transport facilities | 1.70                           |
| VDAG_JR2_Chr1g24720a | Allantoate permease                      | Transport facilities | 1.03                           |
| VDAG_JR2_Chr1g24790a | High-affinity nicotinic acid transporter | Transport facilities | 2.54                           |
| VDAG_JR2_Chr1g26920a | High-affinity glucose transporter SNF3   | Transport facilities | 1.27                           |
| VDAG_JR2_Chr2g02540a | Pantothenate transporter liz1            | Transport facilities | 7.40                           |
| VDAG_JR2_Chr2g02970a | Integral membrane protein                | Transport facilities | 1.18                           |
| VDAG_JR2_Chr2g03860a | Inner membrane transport protein yfaV    | Transport facilities | 2.02                           |
| VDAG_JR2_Chr2g04380a | Integral membrane protein                | Transport facilities | 1.88                           |
| VDAG_JR2_Chr2g04730a | Zinc/iron transporter protein            | Transport facilities | 1.13                           |
| VDAG_JR2_Chr2g08730a | Putative uncharacterized protein         | Transport facilities | 1.43                           |
| VDAG_JR2_Chr2g08880a | Maltose permease MAL31                   | Transport facilities | 1.34                           |
| VDAG_JR2_Chr2g09810a | Inner membrane protein yicO              | Transport facilities | 1.44                           |
| VDAG_JR2_Chr2g12320a | General alpha-glucoside permease         | Transport facilities | 1.43                           |
| VDAG_JR2_Chr2g13170a | Putative uncharacterized protein         | Transport facilities | 1.08                           |
| VDAG_JR2_Chr3g01050a | Membrane transporter D1                  | Transport facilities | 1.34                           |
| VDAG_JR2_Chr3g05190a | Sodium/calcium exchanger protein         | Transport facilities | 1.17                           |
| VDAG_JR2_Chr3g10590a | General alpha-glucoside permease         | Transport facilities | 1.66                           |
| VDAG_JR2_Chr3g12560a | Maltose permease MAL31                   | Transport facilities | 1.21                           |
| VDAG_JR2_Chr3g12800a | Putative uncharacterized protein         | Transport facilities | 1.71                           |

| Gene identifier      | Protein name                               | FunCat description   | log <sub>2</sub> (fold change) |
|----------------------|--------------------------------------------|----------------------|--------------------------------|
| VDAG_JR2_Chr3g12900a | Alpha-glucosides permease MPH2/3           | Transport facilities | 1.08                           |
| VDAG_JR2_Chr4g00720a | Phosphate transporter family protein       | Transport facilities | 1.67                           |
| VDAG_JR2_Chr4g01150a | Glucose/galactose transporter              | Transport facilities | 1.91                           |
| VDAG_JR2_Chr4g01620a | Sulfate permease                           | Transport facilities | 3.70                           |
| VDAG_JR2_Chr4g01750a | Sugar transporter                          | Transport facilities | 1.33                           |
| VDAG_JR2_Chr4g01780a | Aquaporin-1                                | Transport facilities | 1.14                           |
| VDAG_JR2_Chr4g02440a | Putative uncharacterized protein           | Transport facilities | 1.34                           |
| VDAG_JR2_Chr4g03140a | Carnitine O-palmitoyltransferase I         | Transport facilities | 1.14                           |
| VDAG_JR2_Chr4g05930a | Putative uncharacterized protein           | Transport facilities | 3.10                           |
| VDAG_JR2_Chr4g05940a | Alpha-glucosides permease MPH2/3           | Transport facilities | 4.31                           |
| VDAG_JR2_Chr4g06500a | Proton myo-inositol cotransporter          | Transport facilities | 1.73                           |
| VDAG_JR2_Chr4g07840a | Potassium transporter 1                    | Transport facilities | 1.47                           |
| VDAG_JR2_Chr4g10760a | Choline transport protein                  | Transport facilities | 4.55                           |
| VDAG_JR2_Chr4g10900a | Vitamin H transporter                      | Transport facilities | 3.04                           |
| VDAG_JR2_Chr4g11690a | Plasma membrane iron permease              | Transport facilities | 1.05                           |
| VDAG_JR2_Chr4g11820a | General amino-acid permease GAP1           | Transport facilities | 2.99                           |
| VDAG_JR2_Chr4g11930a | Integral membrane protein                  | Transport facilities | 1.68                           |
| VDAG_JR2_Chr4g12110a | High-affinity nicotinic acid transporter   | Transport facilities | 1.50                           |
| VDAG_JR2_Chr4g12160a | Ammonium transporter 1                     | Transport facilities | 2.22                           |
| VDAG_JR2_Chr4g12390a | Putative uncharacterized protein           | Transport facilities | 8.31                           |
| VDAG_JR2_Chr5g00190a | Glucose transporter                        | Transport facilities | 1.09                           |
| VDAG_JR2_Chr5g01240a | Benomyl/methotrexate resistance protein    | Transport facilities | 2.29                           |
| VDAG_JR2_Chr5g01900a | High-affinity potassium transport protein  | Transport facilities | 3.47                           |
| VDAG_JR2_Chr5g01910a | Na <sup>+</sup> /H <sup>+</sup> antiporter | Transport facilities | 2.53                           |
| VDAG_JR2_Chr5g03240a | Maltose permease MAL31                     | Transport facilities | 1.20                           |
| VDAG_JR2_Chr5g03740a | Lactose permease                           | Transport facilities | 1.89                           |
| VDAG_JR2_Chr5g04160a | Proton myo-inositol cotransporter          | Transport facilities | 2.51                           |
| VDAG_JR2_Chr5g05790a | Membrane transporter                       | Transport facilities | 1.24                           |
| VDAG_JR2_Chr5g06010a | DUF250 domain membrane protein             | Transport facilities | 1.31                           |

| Gene identifier      | Protein name                                | FunCat description   | log <sub>2</sub> (fold change) |
|----------------------|---------------------------------------------|----------------------|--------------------------------|
| VDAG_JR2_Chr5g06930a | Choline transport protein                   | Transport facilities | 4.08                           |
| VDAG_JR2_Chr5g07790a | Solute carrier family 35 member E3          | Transport facilities | 1.61                           |
| VDAG_JR2_Chr5g11480a | Peroxisomal-coenzyme A synthetase           | Transport facilities | 2.36                           |
| VDAG_JR2_Chr5g12230a | Na <sup>+</sup> /H <sup>+</sup> antiporter  | Transport facilities | 1.49                           |
| VDAG_JR2_Chr6g01260a | Pantothenate transporter liz1               | Transport facilities | 2.12                           |
| VDAG_JR2_Chr6g01290a | Lactose permease                            | Transport facilities | 1.17                           |
| VDAG_JR2_Chr6g02110a | Thiamine transporter                        | Transport facilities | 1.23                           |
| VDAG_JR2_Chr6g02450a | Putative uncharacterized protein            | Transport facilities | 1.17                           |
| VDAG_JR2_Chr6g03600a | Low-affinity potassium transport protein    | Transport facilities | 1.13                           |
| VDAG_JR2_Chr6g04250a | Pantothenate transporter liz1               | Transport facilities | 3.63                           |
| VDAG_JR2_Chr6g08800a | General alpha-glucoside permease            | Transport facilities | 3.19                           |
| VDAG_JR2_Chr6g09100a | Putative uncharacterized protein            | Transport facilities | 1.69                           |
| VDAG_JR2_Chr6g09380a | Allantoate permease                         | Transport facilities | 1.29                           |
| VDAG_JR2_Chr6g09800a | K <sup>+</sup> /H <sup>+</sup> antiporter 1 | Transport facilities | 2.20                           |
| VDAG_JR2_Chr6g10740a | High-affinity glucose transporter RGT2      | Transport facilities | 6.81                           |
| VDAG_JR2_Chr7g00030a | Pantothenate transporter liz1               | Transport facilities | 1.02                           |
| VDAG_JR2_Chr7g02360a | Oligopeptide transporter 2                  | Transport facilities | 1.59                           |
| VDAG_JR2_Chr7g02750a | Low-affinity potassium transport protein    | Transport facilities | 1.50                           |
| VDAG_JR2_Chr7g03220a | Allantoate permease                         | Transport facilities | 1.78                           |
| VDAG_JR2_Chr7g03610a | Riboflavin transporter MCH5                 | Transport facilities | 2.36                           |
| VDAG_JR2_Chr7g07610a | Choline transport protein                   | Transport facilities | 1.12                           |
| VDAG_JR2_Chr7g09570a | Sugar transporter                           | Transport facilities | 1.01                           |
| VDAG_JR2_Chr7g10310a | Amino-acid permease inda1                   | Transport facilities | 1.13                           |
| VDAG_JR2_Chr8g00990a | Sugar transporter                           | Transport facilities | 2.49                           |
| VDAG_JR2_Chr8g01050a | Phthalate transporter                       | Transport facilities | 1.36                           |
| VDAG_JR2_Chr8g01260a | L-fucose transporter                        | Transport facilities | 5.47                           |
| VDAG_JR2_Chr8g01390a | Maltose permease MAL31                      | Transport facilities | 3.28                           |
| VDAG_JR2_Chr8g01840a | Sugar transporter family protein            | Transport facilities | 1.33                           |
| VDAG_JR2_Chr8g02280a | Vitamin H transporter 1                     | Transport facilities | 1.44                           |

| Gene identifier      | Protein name                              | FunCat description         | log <sub>2</sub> (fold change) |
|----------------------|-------------------------------------------|----------------------------|--------------------------------|
| VDAG_JR2_Chr8g02900a | Putative uncharacterized protein          | Transport facilities       | 2.18                           |
| VDAG_JR2_Chr8g06660a | Ammonium transporter MEP1                 | Transport facilities       | 1.29                           |
| VDAG_JR2_Chr8g07670a | Maltose permease MAL31                    | Transport facilities       | 1.64                           |
| VDAG_JR2_Chr8g09210a | Carboxylic acid transport protein         | Transport facilities       | 7.57                           |
| VDAG_JR2_Chr8g10350a | Phthalate transporter                     | Transport facilities       | 3.85                           |
| VDAG_JR2_Chr8g11110a | Allantoate permease                       | Transport facilities       | 1.96                           |
| VDAG_JR2_Chr8g11120a | Integral membrane protein                 | Transport facilities       | 2.51                           |
| VDAG_JR2_Chr1g00680a | CHIP6 protein                             | Virulence, disease factors | 1.16                           |
| VDAG_JR2_Chr1g02740a | Urease (EC 3.5.1.5) (Urea amidohydrolase) | Virulence, disease factors | 1.25                           |
| VDAG_JR2_Chr1g11690a | Putative uncharacterized protein          | Virulence, disease factors | 1.34                           |
| VDAG_JR2_Chr1g18680a | PBSP domain-containing protein            | Virulence, disease factors | 1.51                           |
| VDAG_JR2_Chr1g21680a | UDP-glucose,sterol transferase            | Virulence, disease factors | 1.95                           |
| VDAG_JR2_Chr1g22490a | Acetylxytan esterase                      | Virulence, disease factors | 1.39                           |
| VDAG_JR2_Chr1g22650a | D-arabinono-1,4-lactone oxidase           | Virulence, disease factors | 1.84                           |
| VDAG_JR2_Chr1g23870a | Integral membrane protein                 | Virulence, disease factors | 2.52                           |
| VDAG_JR2_Chr1g27530a | Putative uncharacterized protein          | Virulence, disease factors | 3.03                           |
| VDAG_JR2_Chr1g28060a | Glucan 1,3-beta-glucosidase               | Virulence, disease factors | 2.38                           |
| VDAG_JR2_Chr1g29070a | Putative uncharacterized protein          | Virulence, disease factors | 2.11                           |
| VDAG_JR2_Chr1g29680a | Glucan 1,3-beta-glucosidase               | Virulence, disease factors | 1.95                           |
| VDAG_JR2_Chr2g02970a | Integral membrane protein                 | Virulence, disease factors | 1.18                           |
| VDAG_JR2_Chr2g04380a | Integral membrane protein                 | Virulence, disease factors | 1.88                           |
| VDAG_JR2_Chr2g08750a | FAD/FMN-containing dehydrogenase          | Virulence, disease factors | 2.33                           |
| VDAG_JR2_Chr2g12010a | Trichothecene efflux pump                 | Virulence, disease factors | 3.01                           |
| VDAG_JR2_Chr3g06090a | UDP-glucose,sterol transferase            | Virulence, disease factors | 2.94                           |
| VDAG_JR2_Chr3g06110a | Cyanide hydratase                         | Virulence, disease factors | 1.55                           |
| VDAG_JR2_Chr3g12800a | Putative uncharacterized protein          | Virulence, disease factors | 1.71                           |
| VDAG_JR2_Chr4g02440a | Putative uncharacterized protein          | Virulence, disease factors | 1.34                           |
| VDAG_JR2_Chr4g03780a | CHIP6 protein                             | Virulence, disease factors | 1.10                           |

| Gene identifier             | Protein name                            | FunCat description         | log <sub>2</sub> (fold change) |
|-----------------------------|-----------------------------------------|----------------------------|--------------------------------|
| <i>VDAG_JR2_Chr4g05930a</i> | Putative uncharacterized protein        | Virulence, disease factors | 3.10                           |
| <i>VDAG_JR2_Chr4g09730a</i> | Putative uncharacterized protein        | Virulence, disease factors | 1.24                           |
| <i>VDAG_JR2_Chr4g11930a</i> | Integral membrane protein               | Virulence, disease factors | 1.68                           |
| <i>VDAG_JR2_Chr5g02420a</i> | UDP-glucose,sterol transferase          | Virulence, disease factors | 1.90                           |
| <i>VDAG_JR2_Chr5g07180a</i> | Rhamnogalacturonan acetylerase          | Virulence, disease factors | 1.63                           |
| <i>VDAG_JR2_Chr6g00450a</i> | Glucan 1,3-beta-glucosidase             | Virulence, disease factors | 1.83                           |
| <i>VDAG_JR2_Chr6g03100a</i> | Putative uncharacterized protein        | Virulence, disease factors | 3.08                           |
| <i>VDAG_JR2_Chr7g01150a</i> | Putative uncharacterized protein        | Virulence, disease factors | 1.20                           |
| <i>VDAG_JR2_Chr7g01470a</i> | Integral membrane protein               | Virulence, disease factors | 1.30                           |
| <i>VDAG_JR2_Chr8g01660a</i> | Putative uncharacterized protein        | Virulence, disease factors | 2.93                           |
| <i>VDAG_JR2_Chr8g10310a</i> | Fatty acid synthase S-acetyltransferase | Virulence, disease factors | 2.70                           |
| <i>VDAG_JR2_Chr8g11120a</i> | Integral membrane protein               | Virulence, disease factors | 2.51                           |

Candidates mentioned in the article are highlighted in light blue.

**Table S2: List of *V. dahliae* genes strongly induced in tomato xylem sap with domains of derived proteins and their putative function.**

| Gene identifier                  | Putative functional category                 | Domains                                                                                                                                                                                    | log <sub>2</sub> (fold change) | Signal peptide                   |
|----------------------------------|----------------------------------------------|--------------------------------------------------------------------------------------------------------------------------------------------------------------------------------------------|--------------------------------|----------------------------------|
| <b>Hydrophobin</b>               |                                              |                                                                                                                                                                                            |                                |                                  |
| <i>VDAG_JR2_Chr1g24730a/VDH5</i> | Hydrophobin                                  | Dense granule Gra6 protein (PR01746, IPR008119), Cerato-ulmin hydrophobin family (PF06766, IPR010636)                                                                                      | 5.99                           | yes                              |
| <i>VDAG_JR2_Chr2g02500a/VDH1</i> | Hydrophobin                                  | Cerato-ulmin hydrophobin family (PF06766, IPR010636)                                                                                                                                       | 5.81                           | yes                              |
| <i>VDAG_JR2_Chr3g09420a/VDH4</i> | Hydrophobin                                  | Cerato-ulmin hydrophobin family (PF06766, IPR010636)                                                                                                                                       | 6.85                           | no, but extracellular prediction |
| <i>VDAG_JR2_Chr4g07990a/VDH2</i> | Hydrophobin                                  | Cerato-ulmin hydrophobin family (PF06766, IPR010636)                                                                                                                                       | 4.54                           | yes                              |
| <b>Metabolism</b>                |                                              |                                                                                                                                                                                            |                                |                                  |
| <i>VDAG_JR2_Chr1g06240a</i>      | Metabolism (carbohydrate)                    | Glycoside hydrolase, family 3, N-terminal (PF00933, IPR001764), Glycoside hydrolase family 3 C-terminal domain (PF01915, IPR002772), Fibronectin type III-like domain (PF14310, IPR026891) | 4.43                           | no                               |
| <i>VDAG_JR2_Chr1g29470a</i>      | Metabolism (purine)                          | Guanylate kinase/L-type calcium channel beta subunit (PF00625, IPR008145)                                                                                                                  | 4.56                           | no                               |
| <i>VDAG_JR2_Chr3g12130a</i>      | Metabolism (RNA)                             | Guanine-specific ribonuclease N1/T1/U2 (PF00545, IPR000026)                                                                                                                                | 4.36                           | yes                              |
| <i>VDAG_JR2_Chr5g09380a</i>      | Metabolism (carbohydrate)                    | Glycoside hydrolase, family 61 (PF03443, IPR005103)                                                                                                                                        | 4.18                           | no, but extracellular prediction |
| <i>VDAG_JR2_Chr6g01140a</i>      | Metabolism (aromatic compound)/Redox process | Extradiol ring-cleavage dioxygenase, class III enzyme, subunit B (PF02900, IPR004183)                                                                                                      | 5.01                           | no                               |

| Gene identifier             | Putative functional category                                       | Domains                                                                                                          | log <sub>2</sub> (fold change) | Signal peptide                   |
|-----------------------------|--------------------------------------------------------------------|------------------------------------------------------------------------------------------------------------------|--------------------------------|----------------------------------|
| <i>VDAG_JR2_Chr6g06580a</i> | Metabolism (phospholipid)                                          | Phospholipase A2, prokaryotic/fungal (PF09056, IPR015141)                                                        | 4.20                           | yes                              |
| <i>VDAG_JR2_Chr7g00075a</i> | Metabolism (carbohydrate)                                          | Glycoside hydrolase, family 3, N-terminal (PF00933, IPR001764)                                                   | 5.09                           | no, but extracellular prediction |
| <i>VDAG_JR2_Chr7g01620a</i> | Metabolism (carbohydrate)                                          | Alginate lyase domain (PF05426, IPR008397)                                                                       | 7.04                           | yes                              |
| <i>VDAG_JR2_Chr8g09390a</i> | Metabolism (carbohydrate)                                          | Glycoside hydrolase family 10 domain (PF00331, IPR001000), Cellulose-binding domain, fungal (PF00734, IPR000254) | 4.22                           | yes                              |
| <i>VDAG_JR2_Chr8g09870a</i> | Metabolism (amino acid)                                            | Histidinol dehydrogenase (PF00815, IPR012131)                                                                    | 4.63                           | no                               |
| <b>Others</b>               |                                                                    |                                                                                                                  |                                |                                  |
| <i>VDAG_JR2_Chr1g23760a</i> | Others (iron storage and detoxification)                           | Ferritin-like (PF13668, IPR012347)                                                                               | 5.93                           | yes                              |
| <i>VDAG_JR2_Chr2g04040a</i> | Others (adhesion)                                                  | Agglutinin-like protein repeat (PF05792, IPR008440)                                                              | 8.03                           | no, but extracellular prediction |
| <i>VDAG_JR2_Chr3g06480a</i> | Others (stress response)                                           | RTA-like protein (PF04479, IPR007568)                                                                            | 9.46                           | no                               |
| <i>VDAG_JR2_Chr6g01130a</i> | Others (decarboxylation)                                           | FAD-binding domain (PF01494, IPR002938), Acetoacetate decarboxylase (PF06314, IPR010451)                         | 5.17                           | no                               |
| <i>VDAG_JR2_Chr7g01630a</i> | Others (virulence: pectin lyase fold/virulence factor superfamily) | Right-handed beta helix domain (PF13229, IPR039448)                                                              | 7.27                           | no, but extracellular prediction |
| <i>VDAG_JR2_Chr8g09420a</i> | Others (secondary metabolism)                                      | Mycotoxin biosynthesis protein UstYa-like (PF11807, IPR021765)                                                   | 4.08                           | no                               |
| <i>VDAG_JR2_Chr8g09430a</i> | Others (dephosphorylation)                                         | Alkaline phosphatase (PF00245, IPR001952)                                                                        | 4.83                           | no                               |

| Gene identifier             | Putative functional category  | Domains                                                                                                                                              | log <sub>2</sub> (fold change) | Signal peptide                   |
|-----------------------------|-------------------------------|------------------------------------------------------------------------------------------------------------------------------------------------------|--------------------------------|----------------------------------|
| <b>Proteolysis</b>          |                               |                                                                                                                                                      |                                |                                  |
| <i>VDAG_JR2_Chr1g11650a</i> | Proteolysis                   | Peptidase M43, pregnancy-associated plasma-A (PF05572, IPR008754)                                                                                    | 5.39                           | yes                              |
| <i>VDAG_JR2_Chr1g21900a</i> | Proteolysis                   | Peptidase M43, pregnancy-associated plasma-A (PF05572, IPR008754)                                                                                    | 4.87                           | yes                              |
| <i>VDAG_JR2_Chr4g03040a</i> | Proteolysis                   | Peptidase S8 propeptide/proteinase inhibitor I9 (PF05922, IPR010259), Peptidase S8/S53 domain (PF00082, IPR000209)                                   | 4.14                           | yes                              |
| <i>VDAG_JR2_Chr4g04480a</i> | Proteolysis                   | Peptidase S8/S53 domain (PF00082, IPR000209)                                                                                                         | 5.32                           | no                               |
| <i>VDAG_JR2_Chr4g11050a</i> | Proteolysis                   | Peptidase M14, carboxypeptidase A (PF00246, IPR000834)                                                                                               | 5.64                           | yes                              |
| <i>VDAG_JR2_Chr4g11220a</i> | Proteolysis                   | Peptidase M28 (PF04389, IPR007484)                                                                                                                   | 4.51                           | yes                              |
| <i>VDAG_JR2_Chr5g01660a</i> | Proteolysis                   | Peptidase M14, carboxypeptidase A (PF00246, IPR000834)                                                                                               | 6.60                           | yes                              |
| <i>VDAG_JR2_Chr5g03150a</i> | Proteolysis                   | Peptidase M43, pregnancy-associated plasma-A (PF05572, IPR008754)                                                                                    | 4.27                           | no, but extracellular prediction |
| <i>VDAG_JR2_Chr5g09960a</i> | Proteolysis                   | Peptidase S41 family protein (PTHR37049)                                                                                                             | 4.21                           | yes                              |
| <i>VDAG_JR2_Chr5g09970a</i> | Proteolysis                   | Peptidase inhibitor I66 (PF16850, IPR031755)                                                                                                         | 6.56                           | no                               |
| <i>VDAG_JR2_Chr5g09980a</i> | Proteolysis                   | Serine proteases, trypsin domain (PF00089, IPR001254)                                                                                                | 9.37                           | yes                              |
| <b>Redox process</b>        |                               |                                                                                                                                                      |                                |                                  |
| <i>VDAG_JR2_Chr1g00390a</i> | Redox process/Transport (ion) | Multicopper oxidase, type 1 (PF00394, IPR001117), Multicopper oxidase, type 2 (PF07731, IPR011706), Multicopper oxidase, type 3 (PF07732, IPR011707) | 4.06                           | yes                              |
| <i>VDAG_JR2_Chr1g05390a</i> | Redox process                 | Aldehyde dehydrogenase domain (PF00171, IPR015590)                                                                                                   | 4.23                           | no                               |

| Gene identifier             | Putative functional category | Domains                                                                                                                                                                                                                                                                            | log <sub>2</sub> (fold change) | Signal peptide |
|-----------------------------|------------------------------|------------------------------------------------------------------------------------------------------------------------------------------------------------------------------------------------------------------------------------------------------------------------------------|--------------------------------|----------------|
| <i>VDAG_JR2_Chr1g21690a</i> | Redox process                | FMN-dependent dehydrogenase (PF01070, IPR000262)                                                                                                                                                                                                                                   | 4.12                           | yes            |
| <i>VDAG_JR2_Chr2g13240a</i> | Redox process                | Glucose-methanol-choline oxidoreductase, N-terminal (PF00732, IPR000172), Glucose-methanol-choline oxidoreductase, C-terminal (PF05199, IPR007867)                                                                                                                                 | 4.55                           | yes            |
| <i>VDAG_JR2_Chr3g11590a</i> | Redox process                | Pyridine nucleotide-disulphide oxidoreductase (PF13738)                                                                                                                                                                                                                            | 5.17                           | no             |
| <i>VDAG_JR2_Chr4g00210a</i> | Redox process                | Multicopper oxidase, type 1 (PF00394, IPR001117), Multicopper oxidase, type 2 (PF07731, IPR011706), Multicopper oxidase, type 3 (PF07732, IPR011707)                                                                                                                               | 6.21                           | yes            |
| <i>VDAG_JR2_Chr4g04660a</i> | Redox process                | FMN-dependent dehydrogenase (PF01070, IPR000262)                                                                                                                                                                                                                                   | 4.01                           | yes            |
| <i>VDAG_JR2_Chr4g10780a</i> | Redox process                | Cytochrome P450 (PF00067, IPR001128)                                                                                                                                                                                                                                               | 4.85                           | no             |
| <i>VDAG_JR2_Chr5g06940a</i> | Redox process                | Amine oxidase (PF01593, IPR002937)                                                                                                                                                                                                                                                 | 4.95                           | no             |
| <i>VDAG_JR2_Chr8g09050a</i> | Redox process                | Cytochrome P450 (PF00067, IPR001128)                                                                                                                                                                                                                                               | 7.72                           | no             |
| <i>VDAG_JR2_Chr8g10330a</i> | Redox process                | 6-phosphogluconate dehydrogenase, NADP-binding (PF03446, IPR006115), 3-hydroxyisobutyrate dehydrogenase, NAD-binding domain (PF14833, IPR029154), Four-carbon acid sugar kinase, N-terminal domain (PF07005, IPR010737), Nucleotide-binding C-terminal domain (PF17042, IPR031475) | 4.02                           | no             |
| <b>Transcription</b>        |                              |                                                                                                                                                                                                                                                                                    |                                |                |
| <i>VDAG_JR2_Chr3g06100a</i> | Transcription                | Zn(2)-C6 fungal-type DNA-binding domain (PF00172, IPR001138), Fungal transcription factor (PF11951, IPR021858)                                                                                                                                                                     | 4.83                           | no             |

| Gene identifier             | Putative functional category | Domains                                                           | log <sub>2</sub> (fold change) | Signal peptide |
|-----------------------------|------------------------------|-------------------------------------------------------------------|--------------------------------|----------------|
| <i>VDAG_JR2_Chr8g09060a</i> | Transcription                | Zn(2)-C6 fungal-type DNA-binding domain (PF00172, IPR001138)      | 4.48                           | no             |
| <b>Transport</b>            |                              |                                                                   |                                |                |
| <i>VDAG_JR2_Chr1g01070a</i> | Transport (transmembrane)    | Major facilitator superfamily (PF07690, IPR011701)                | 4.75                           | no             |
| <i>VDAG_JR2_Chr1g05420a</i> | Transport (transmembrane)    | Amino acid transporter, transmembrane domain (PF01490, IPR013057) | 8.43                           | no             |
| <i>VDAG_JR2_Chr1g24150a</i> | Transport (transmembrane)    | Purine-cytosine permease (PF02133, IPR001248)                     | 6.18                           | no             |
| <i>VDAG_JR2_Chr1g24740a</i> | Transport (transmembrane)    | Major facilitator superfamily (PF07690, IPR011701)                | 4.32                           | no             |
| <i>VDAG_JR2_Chr2g02540a</i> | Transport (transmembrane)    | Major facilitator superfamily (PF07690, IPR011701)                | 7.40                           | no             |
| <i>VDAG_JR2_Chr2g04500a</i> | Transport (transmembrane)    | Major facilitator, sugar transporter-like (PF00083, IPR005828)    | 4.34                           | no             |
| <i>VDAG_JR2_Chr3g10430a</i> | Transport (transmembrane)    | Major facilitator, sugar transporter-like (PF00083, IPR005828)    | 4.55                           | no             |
| <i>VDAG_JR2_Chr4g05940a</i> | Transport (transmembrane)    | Major facilitator, sugar transporter-like (PF00083, IPR005828)    | 4.31                           | no             |
| <i>VDAG_JR2_Chr4g09800a</i> | Transport (transmembrane)    | Major facilitator superfamily (PF07690, IPR011701)                | 4.30                           | no             |
| <i>VDAG_JR2_Chr4g10760a</i> | Transport (transmembrane)    | Amino acid/polyamine transporter I (PF13520, IPR002293)           | 4.55                           | no             |
| <i>VDAG_JR2_Chr4g12390a</i> | Transport (transmembrane)    | Major facilitator superfamily (PF07690, IPR011701)                | 8.31                           | no             |
| <i>VDAG_JR2_Chr5g03250a</i> | Transport (transmembrane)    | MFS transporter superfamily (SSF103473, IPR036259)                | 4.37                           | no             |
| <i>VDAG_JR2_Chr5g06930a</i> | Transport (transmembrane)    | Amino acid/polyamine transporter I (PF13520, IPR002293)           | 4.08                           | no             |

| Gene identifier             | Putative functional category                                                         | Domains                                                        | log <sub>2</sub> (fold change) | Signal peptide                   |
|-----------------------------|--------------------------------------------------------------------------------------|----------------------------------------------------------------|--------------------------------|----------------------------------|
| <i>VDAG_JR2_Chr6g10740a</i> | Transport (transmembrane)                                                            | Major facilitator, sugar transporter-like (PF00083, IPR005828) | 6.81                           | no                               |
| <i>VDAG_JR2_Chr7g03180a</i> | Transport (transmembrane)                                                            | Major facilitator superfamily (PF07690, IPR011701)             | 4.22                           | no                               |
| <i>VDAG_JR2_Chr8g01260a</i> | Transport (transmembrane)                                                            | Major facilitator superfamily (PF07690, IPR011701)             | 5.47                           | no                               |
| <i>VDAG_JR2_Chr8g09210a</i> | Transport (transmembrane)                                                            | Major facilitator, sugar transporter-like (PF00083, IPR005828) | 7.57                           | no                               |
| <b>Unknown function</b>     |                                                                                      |                                                                |                                |                                  |
| <i>VDAG_JR2_Chr1g01520a</i> | Unknown function                                                                     | -                                                              | 4.35                           | no                               |
| <i>VDAG_JR2_Chr1g04580a</i> | Unknown function                                                                     | -                                                              | 4.67                           | no                               |
| <i>VDAG_JR2_Chr1g05400a</i> | Unknown function                                                                     | NACHT nucleoside triphosphatase (PF05729, IPR007111)           | 5.15                           | no                               |
| <i>VDAG_JR2_Chr1g11660a</i> | Unknown function (potential membrane protein)                                        | -                                                              | 4.10                           | yes                              |
| <i>VDAG_JR2_Chr2g03100a</i> | Unknown function (potentially extracellular)                                         | Protein of unknown function DUF4419                            | 6.94                           | yes                              |
| <i>VDAG_JR2_Chr2g04030a</i> | Unknown function                                                                     | -                                                              | 6.94                           | no                               |
| <i>VDAG_JR2_Chr2g04050a</i> | Unknown function (potential membrane protein)                                        | -                                                              | 8.46                           | yes                              |
| <i>VDAG_JR2_Chr2g11700a</i> | Unknown function                                                                     | -                                                              | 4.24                           | no                               |
| <i>VDAG_JR2_Chr2g12700a</i> | Unknown function (potential extracellular, small, C-rich protein; no signal peptide) | -                                                              | 4.75                           | no, but extracellular prediction |
| <i>VDAG_JR2_Chr3g05620a</i> | Unknown function (potentially extracellular)                                         | Knottin, scorpion toxin-like superfamily (IPR036574)           | 7.36                           | yes                              |
| <i>VDAG_JR2_Chr3g12210a</i> | Unknown function (potentially extracellular)                                         | Carboxylesterase, type B (PF00135, IPR002018)                  | 4.43                           | yes                              |
| <i>VDAG_JR2_Chr4g01640a</i> | Unknown function                                                                     | -                                                              | 4.68                           | no                               |

| Gene identifier             | Putative functional category                 | Domains                                                         | log <sub>2</sub> (fold change) | Signal peptide |
|-----------------------------|----------------------------------------------|-----------------------------------------------------------------|--------------------------------|----------------|
| <i>VDAG_JR2_Chr4g02770a</i> | Unknown function                             | Domain of unknown function DUF1524 (PF07510, IPR011089)         | 5.39                           | no             |
| <i>VDAG_JR2_Chr4g05480a</i> | Unknown function                             | Alpha/beta hydrolase fold-3 (PF07859, IPR013094)                | 4.16                           | no             |
| <i>VDAG_JR2_Chr4g11330a</i> | Unknown function (potential effector)        | -                                                               | 5.34                           | yes            |
| <i>VDAG_JR2_Chr5g05880a</i> | Unknown function (potentially extracellular) | Family of unknown function DUF5695 (PF18951)                    | 4.33                           | yes            |
| <i>VDAG_JR2_Chr5g07170a</i> | Unknown function                             | -                                                               | 5.68                           | no             |
| <i>VDAG_JR2_Chr7g01190a</i> | Unknown function (potentially extracellular) | -                                                               | 4.56                           | yes            |
| <i>VDAG_JR2_Chr8g01400a</i> | Unknown function                             | -                                                               | 5.89                           | no             |
| <i>VDAG_JR2_Chr8g01770a</i> | Unknown function                             | Histidine phosphatase superfamily, clade-1 (PF00300, IPR013078) | 4.19                           | no             |
| <i>VDAG_JR2_Chr8g01900a</i> | Unknown function                             | -                                                               | 4.24                           | no             |
| <i>VDAG_JR2_Chr8g09410a</i> | Unknown function (potentially extracellular) | -                                                               | 5.41                           | yes            |
| <i>VDAG_JR2_Chr8g09730a</i> | Unknown function                             | -                                                               | 4.46                           | no             |

Candidates mentioned in the article are highlighted in light blue.

**Table S3: Primer oligonucleotides used in this study.**

| Primer name | Primer sequence (5' → 3')                                 | Length (-mer) | Overhang to             |
|-------------|-----------------------------------------------------------|---------------|-------------------------|
| IM28        | <b>ATT CTT AAT TAA GAT</b> GGA GAA AAG GGC AAT GGT        | 33            | pME4564                 |
| IM29        | <b>AGA TCC CCG GGT ACC</b> TTT GAT GGT TGG GGG TTG        | 33            | <i>p<sub>gpdA</sub></i> |
| IM30        | <b>AGG TAA TCC TTC TTT</b> GCG TCG CGG TTC CCG GAC        | 33            | <i>trpC<sup>t</sup></i> |
| IM31        | <b>AGG ACT TCT AGA AGG</b> CAC GTT TCT AAC ACG TGC CGC    | 36            | pME4564                 |
| IM36        | <b>ATT CTT AAT TAA GAT</b> AGC TTG TTT CTG CTG ATC        | 33            | pME4564                 |
| IM37        | <b>ACC GGT CAC TGT ACA</b> GGC CAC CGA CTT TAT ATA        | 33            | <i>p<sub>gpdA</sub></i> |
| IM38        | <b>AGG TAA TCC TTC TTT</b> GTA CCA GCC CGG CTG TGA        | 33            | <i>trpC<sup>t</sup></i> |
| IM39        | <b>AGG ACT TCT AGA AGG</b> ATT GCG AGA CGC TTA GCC        | 33            | pME4564                 |
| IM52        | ATG AAG TTC ACC ACT GTC GC                                | 20            | -                       |
| IM53        | TTA GGC GGC GAC GCC AAC                                   | 18            | -                       |
| IM54        | ATG CCA GGT CTA GAG CTC TC                                | 20            | -                       |
| IM76        | <b>ATT CTT AAT TAA GAT</b> CCT CAT CTG TTG AAT TTC GT     | 35            | pME4564                 |
| IM77        | <b>ATA TCA GTT AAC GTC</b> CTT GGG ATA GTA AAT AGA TAC TG | 38            | <i>p<sub>trpC</sub></i> |
| IM78        | <b>ACC AGC CCC TGG GTT</b> TAG AAT AGC TCG TGG TGC G      | 34            | <i>trpC<sup>t</sup></i> |
| IM79        | <b>AGG ACT TCT AGA AGG</b> AAT AGC GCG GCC TGA CAA        | 33            | pME4564                 |
| IM80        | <b>ATT CTT AAT TAA GAT</b> TGC CGA TCC CAT TCC CCA        | 33            | pME4564                 |
| IM81        | <b>ATA TCA GTT AAC GTC</b> TTT GAA GGT GGT TTG GTT TGG T  | 37            | <i>p<sub>trpC</sub></i> |
| IM82        | <b>ACC AGC CCC TGG GTT</b> GCG CTG CAT GGG CGG TAC        | 33            | <i>trpC<sup>t</sup></i> |
| IM83        | <b>AGG ACT TCT AGA AGG</b> CAG CTG TAG ATC ACT CGA GTT CC | 38            | pME4564                 |
| JST253      | GAC GTT AAC TGA TAT TGA AGG AGC AC                        | 26            | -                       |
| JST254      | AAC CCA GGG GCT GGT GA                                    | 17            | -                       |
| ML8         | AAA GAA GGA TTA CCT CTA AAC AA                            | 23            | -                       |
| ML9         | TGT ACA GTG ACC GGT GAC                                   | 18            | -                       |
| ML184       | <b>CTC TAG ACC TGG CAT</b> GGC CAC CGA CTT TAT ATA TCA GT | 38            | <i>VDH4</i>             |
| ML185       | <b>ACC AGC CCC TGG GTT</b> GTA CCA GCC CGG CTG TG         | 32            | <i>trpC<sup>t</sup></i> |

| Primer name                         | Primer sequence (5' → 3')                                | Length (-mer)                        | Overhang to              |
|-------------------------------------|----------------------------------------------------------|--------------------------------------|--------------------------|
| ML186                               | <b>ATA TCA GTT AAC GTC</b> TTA GAC GCC GAC GGG CTT       | 33                                   | <sup>p</sup> <i>trpC</i> |
| ML187                               | <b>AGT GGT GAA CTT CAT</b> TTT GAT GGT TGG GGG TTG GAG A | 37                                   | <i>VDH5</i>              |
| ML188                               | <b>ACC AGC CCC TGG GTT</b> GCG TCG CGG TTC CCG GA        | 32                                   | <i>trpC</i> <sup>t</sup> |
| ML189                               | <b>ATA TCA GTT AAC GTC</b> TTA GGC GGC GAC GCC AAC       | 33                                   | <sup>p</sup> <i>trpC</i> |
| RO3                                 | GGT ACC CGG GGA TCT TTC G                                | 19                                   | -                        |
| <b>Primers for quantitative PCR</b> |                                                          |                                      |                          |
| Primer name                         | Primer sequence (5' → 3')                                | Target gene                          |                          |
| IM118                               | GGA ACT TGA GAA GGA GCC TAA G                            | <i>EF1α/ Solyc06g005060.3</i>        |                          |
| IM119                               | CAA CAC CAA CAG CAA CAG TCT                              | <i>EF1α/ Solyc06g005060.3</i>        |                          |
| OLG70 [17]                          | CAG CGA AAC GCG ATA TGT AG                               | 5.8S rRNA                            |                          |
| OLG71 [17]                          | GGC TTG TAG GGG GTT TAG A                                | 5.8S rRNA                            |                          |
| qVDH1-F [40]                        | ACG ATT GCT CTG TTT GCT GGA G                            | VDH1/<br><i>VDAG_JR2_Chr2g02500a</i> |                          |
| qVDH1-R [40]                        | CCT GGC ACT CTT TGG GGT AGA G                            | VDH1/<br><i>VDAG_JR2_Chr2g02500a</i> |                          |
| qVDH2-F                             | TGC ACT CCC GTC ATT GCT TAA G                            | VDH2/<br><i>VDAG_JR2_Chr4g07990a</i> |                          |
| qVDH2-R                             | TCA CCG AAC CGT CTA TCT GAG C                            | VDH2/<br><i>VDAG_JR2_Chr4g07990a</i> |                          |
| qVDH3-F                             | GAG GAC CGC CAA GTC TAC ATC C                            | VDH3/<br><i>VDAG_JR2_Chr1g24880a</i> |                          |
| qVDH3-R                             | CAC CCT GGT CAA GAA TGG GAA G                            | VDH3/<br><i>VDAG_JR2_Chr1g24880a</i> |                          |
| qVDH4-F                             | AAG TCC TTC ACT GCC ATC GTC                              | VDH4/<br><i>VDAG_JR2_Chr3g09420a</i> |                          |
| qVDH4-R                             | GTT GGC GCT CTT GGG GTT CT                               | VDH4/<br><i>VDAG_JR2_Chr3g09420a</i> |                          |
| qVDH5-F                             | CCC GTC TGC TGC GCT ACT AA                               | VDH5/<br><i>VDAG_JR2_Chr1g24730a</i> |                          |
| qVDH5-R                             | GTT GAG GAG GTT GAG GGT GCA G                            | VDH5/<br><i>VDAG_JR2_Chr1g24730a</i> |                          |

<sup>p</sup>: promoter, <sup>t</sup>: terminator; bold: overhangs for Seamless Cloning.

**Table S4: Plasmids used in this study.**

| Plasmid name | Description                                                                                                                                                                      | Reference  |
|--------------|----------------------------------------------------------------------------------------------------------------------------------------------------------------------------------|------------|
| pCOM         | Cloning vector with <i>KAN<sup>R</sup></i> , <i><sup>p</sup>trpC:GEN<sup>R</sup>:trpC<sup>t</sup></i> , left and right border for <i>A. tumefaciens</i> -mediated transformation | [41]       |
| pPK2         | Cloning vector with <i>KAN<sup>R</sup></i> and <i>HYG<sup>R</sup></i> ; left and right border for <i>A. tumefaciens</i> -mediated transformation                                 | [43]       |
| pME4564      | Cloning vector with <i>KAN<sup>R</sup></i> and <i>HYG<sup>R</sup></i> ; left and right border for <i>A. tumefaciens</i> -mediated transformation                                 | [42]       |
| pME4815      | <i><sup>p</sup>gpdA:NAT<sup>R</sup>:trpC<sup>t</sup></i> in pME4564                                                                                                              | [42]       |
| pME5484      | <i><sup>p</sup>VDH2:<sup>p</sup>gpdA:GEN<sup>R</sup>:trpC<sup>t</sup>:VDH2<sup>t</sup></i> in pME4564                                                                            | This study |
| pME5485      | <i><sup>p</sup>VDH4:<sup>p</sup>gpdA:NAT<sup>R</sup>:trpC<sup>t</sup>:VDH4<sup>t</sup></i> in pME4564                                                                            | This study |
| pME5486      | <i><sup>p</sup>VDH5:<sup>p</sup>gpdA:HYG<sup>R</sup>:trpC<sup>t</sup>:VDH5<sup>t</sup></i> in pME4564                                                                            | This study |
| pME5487      | <i><sup>p</sup>VDH4:VDH4:<sup>p</sup>trpC:GEN<sup>R</sup>:trpC<sup>t</sup>:VDH4<sup>t</sup></i> in pME4564                                                                       | This study |
| pME5488      | <i><sup>p</sup>VDH5:VDH5:<sup>p</sup>trpC:GEN<sup>R</sup>:trpC<sup>t</sup>:VDH5<sup>t</sup></i> in pME4564                                                                       | This study |
| pME5511      | <i><sup>p</sup>VDH1:<sup>p</sup>gpdA:GEN<sup>R</sup>:trpC<sup>t</sup>:VDH1<sup>t</sup></i> in pME4564                                                                            | This study |

<sup>p</sup>: promoter, <sup>t</sup>: terminator, *GEN<sup>R</sup>*: geneticin resistance marker, *HYG<sup>R</sup>*: hygromycin B resistance marker, *KAN<sup>R</sup>*: kanamycin resistance marker, *NAT<sup>R</sup>*: nourseothricin resistance marker.

**Table S5: Fungal and bacterial strains used in this study.**

| Strain name                             | Description                                                                                                                                                                                                                                             | Reference                           |
|-----------------------------------------|---------------------------------------------------------------------------------------------------------------------------------------------------------------------------------------------------------------------------------------------------------|-------------------------------------|
| <b><i>Agrobacterium tumefaciens</i></b> |                                                                                                                                                                                                                                                         |                                     |
| AGL1                                    | Strain for <i>A. tumefaciens</i> -mediated transformation of <i>V. dahliae</i>                                                                                                                                                                          | [37]                                |
| <b><i>Escherichia coli</i></b>          |                                                                                                                                                                                                                                                         |                                     |
| DH5α                                    | Strain for cloning and extraction of plasmids                                                                                                                                                                                                           | Invitrogen Thermo Fisher Scientific |
| <b><i>Verticillium dahliae</i></b>      |                                                                                                                                                                                                                                                         |                                     |
| JR2/WT                                  | <i>Solanum lycopersicum</i> isolate                                                                                                                                                                                                                     | [22]                                |
| ΔVDH2<br>(VGB648/<br>VGB649)            | VDH2 deletion strain (ΔVDH2:: <sup>p</sup> trpC:GEN <sup>R</sup> :trpC <sup>t</sup> )                                                                                                                                                                   | This study                          |
| ΔVDH4<br>(VGB566/<br>VGB567)            | VDH4 deletion strain (ΔVDH4:: <sup>p</sup> gpdA:NAT <sup>R</sup> :trpC <sup>t</sup> )                                                                                                                                                                   | This study                          |
| ΔVDH5<br>(VGB568/<br>VGB569)            | VDH5 deletion strain (ΔVDH5:: <sup>p</sup> gpdA:HYG <sup>R</sup> :trpC <sup>t</sup> )                                                                                                                                                                   | This study                          |
| ΔVDH2/5<br>(VGB651)                     | VDH2/5 double deletion strain<br>(ΔVDH2:: <sup>p</sup> trpC:GEN <sup>R</sup> :trpC <sup>t</sup> ;<br>ΔVDH5:: <sup>p</sup> gpdA:HYG <sup>R</sup> :trpC <sup>t</sup> )                                                                                    | This study                          |
| ΔVDH4/5<br>(VGB623/<br>VGB624)          | VDH4/5 double deletion strain<br>(ΔVDH4:: <sup>p</sup> gpdA:NAT <sup>R</sup> :trpC <sup>t</sup> ;<br>ΔVDH5:: <sup>p</sup> gpdA:HYG <sup>R</sup> :trpC <sup>t</sup> )                                                                                    | This study                          |
| ΔVDH1/4/5<br>(VGB646/<br>VGB647)        | VDH1/4/5 triple deletion strain<br>(ΔVDH1:: <sup>p</sup> trpC:GEN <sup>R</sup> :trpC <sup>t</sup> ; ΔVDH4:: <sup>p</sup> gpdA:NAT <sup>R</sup> :trpC <sup>t</sup> ;<br>ΔVDH5:: <sup>p</sup> gpdA:HYG <sup>R</sup> :trpC <sup>t</sup> )                  | This study                          |
| ΔVDH2/4/5<br>(VGB657)                   | VDH2/4/5 triple deletion strain<br>(ΔVDH2:: <sup>p</sup> trpC:GEN <sup>R</sup> :trpC <sup>t</sup> ; ΔVDH4:: <sup>p</sup> gpdA:NAT <sup>R</sup> :trpC <sup>t</sup> ;<br>ΔVDH5:: <sup>p</sup> gpdA:HYG <sup>R</sup> :trpC <sup>t</sup> )                  | This study                          |
| VDH4-C/<br>ΔVDH5<br>(VGB690/<br>VGB691) | VDH4 complementation strain in the VDH4/5 double deletion background<br>(ΔVDH4:: <sup>p</sup> VDH4:VDH4:: <sup>p</sup> trpC:GEN <sup>R</sup> :trpC <sup>t</sup> :VDH4 <sup>t</sup> ;<br>ΔVDH5:: <sup>p</sup> gpdA:HYG <sup>R</sup> :trpC <sup>t</sup> ) | This study                          |
| VDH5-C/<br>ΔVDH4<br>(VGB692)            | VDH4 complementation strain in the VDH4/5 double deletion background<br>(ΔVDH5:: <sup>p</sup> VDH5:VDH5:: <sup>p</sup> trpC:GEN <sup>R</sup> :trpC <sup>t</sup> :VDH5 <sup>t</sup> ;<br>ΔVDH4:: <sup>p</sup> gpdA:NAT <sup>R</sup> :trpC <sup>t</sup> ) | This study                          |

<sup>p</sup>: promoter, <sup>t</sup>: terminator, GEN<sup>R</sup>: geneticin resistance marker, HYG<sup>R</sup>: hygromycin B resistance marker, NAT<sup>R</sup>: nourseothricin resistance marker; two VGB numbers for one genotype indicate two independent transformants.

**Table S6: Cysteine spacing of *V. dahliae* JR2 hydrophobins and comparison with the consensus of cysteine spacing patterns in class I and II hydrophobins.**

| Hydrophobin             | Cysteine spacing                         |
|-------------------------|------------------------------------------|
| Consensus Class I [53]  | CX5-7 CCX19-39 CX8-23 CX5 CCX6-18 CX2-13 |
| Consensus Class II [53] | CX9-10 CCX11 CX16 CX8-9 CCX10 CX6-7      |
| Vdh1                    | CX9 CCX11 CX15 CX6 CCX10 CX6             |
| Vdh2                    | CX10 CCX11 CX16 CX8 CCX10 CX5            |
| Vdh3                    | CX8 CCX11 CX16 CX8 CCX10 CX8             |
| Vdh4                    | CX8 CCX11 CX15 CX8 CCX10 CX6             |
| Vdh5                    | CX9 CCX11 CX16 CX8 CCX10 CX8             |
