# Supplementary material for: Tomato Xylem Sap Hydrophobins Vdh4 and Vdh5 Are Important for Late Stages of Verticillium dahliae Plant Infection
Source: J Fungi (Basel). 2022 Nov 27;8(12):1252. doi: 10.3390/jof8121252 (PMC9783231; doi:10.3390/jof8121252)
Supplement: Supplementary file 1 [file jof-08-01252-s001.zip › Kopie von jof-2011945_DataS1_221121.xlsx]

## Sheet: Figure 1b
Figure 1b
Transcription values were normalized to the housekeeping genes H2A and EIF2B. Transcript levels for the data from the xylem sap condition were set to one. Each value is the mean of three technical/pipetting replicates (n=1).
	Relative normalized VDH1 transcript levels
	Simulated xylem medium	Xylem sap
Experiment 1	0.02882	1
Experiment 2	0.01284	1
Experiment 3	0.01205	1
n	3	3
	Relative normalized VDH2 transcript levels
	Simulated xylem medium	Xylem sap
Experiment 1	0.1995	1
Experiment 2	0.06861	1
Experiment 3	0.08896	1
n	3	3
	Relative normalized VDH4 transcript levels
	Simulated xylem medium	Xylem sap
Experiment 1	0.0324	1
Experiment 2	0.00535	1
Experiment 3	0	1
n	3	3
	Relative normalized VDH5 transcript levels
	Simulated xylem medium	Xylem sap
Experiment 1	0.04677	1
Experiment 2	0.01448	1
Experiment 3	0.02665	1
n	3	3

## Sheet: Figure 3b
Figure 3b
Each value represents the number of spores determined per culture. The mean values of three technical replicates were used as one biological replicate (n=1).
Means and standard deviations of the biological replicates were calculated. The mean of the data from the wild-type strain was set to one. The other data were calculated relative to the wild-type strain.
		WT	ΔVHD4	ΔVHD5	ΔVHD4/5
Experiment 1	Biological replicate 1	323000000	284100000	265200000	295000000
		314500000	361900000	289000000	299600000
		251700000	209400000	288900000	296100000
	Biological replicate 2	222300000	209600000	240000000	442000000
		206600000	230700000	279700000	335800000
		306700000	247200000	303700000	337300000
Experiment 2	Biological replicate 1	302400000	348300000	351100000	338200000
		299400000	322000000	369500000	296800000
		270400000	335600000	386000000	323300000
	Biological replicate 2	316800000	289400000	321700000	324500000
		330900000	261300000	344200000	323400000
		278100000	284400000	326900000	384700000
	n	4	4	4	4

## Sheet: Figure 4b
Figure 4b
Fungal DNA was quantified relative to the tomato elongation factor-encoding gene EF1α. Values obtained from the wild-type strain were set to one. Each value is the mean of three technical/pipetting replicates (n=1).
		Mock	WT	ΔVDH4	ΔVDH5	ΔVDH4/5	VDH4-C/ΔVDH5	VDH5-C/ΔVDH4
Experiment 1	Replicate 1	0.144732	1	0.33248	0.251092	0.307083	0.337038	0.370671
	Replicate 2	0.483112	1	0.335434	0.365567	0.6818	1.00515	0.239326
Experiment 2	Replicate 1	0.0327964	1	2.09902	1.29133	2.74882	1.35015	1.29258
Experiment 3	Replicate 1	0.0173598	1	0.208144	0.154589	0.399312	1.49558	1.71142
	n	4	4	4	4	4	4	4

## Sheet: Figure 5b
Figure 5b
Fungal DNA was quantified relative to the tomato elongation factor-encoding gene EF1α. Values obtained from the wild-type strain were set to one. Each value is the mean of three technical/pipetting replicates (n=1).
		Mock	WT	ΔVDH2	ΔVDH2/5	ΔVDH2/4/5
Experiment 1	Replicate 1	0.108893	1	0.568805	0.437587	0.523676
Experiment 2	Replicate 1	0.0703856	1	0.765084	0.433708	0.623693
Experiment 3	Replicate 1	0.0236058	1	0.488399	0.343224	0.89046
	Replicate 2	0.00799673	1	0.370287	0.892815	0.342246
	n	4	4	4	4	4

## Sheet: Figure 6
Figure 6
In at least two independent experiments, 15 tomato plants per treatment were inoculated with water (mock) or independent cultures of each strain.
Plants were categorized as described in the Materials & Methods section under 'Infection of tomato plants'.
	Mock	WT	ΔVDH4	ΔVDH5	ΔVDH4/5	VDH4-C/ΔVDH5	VDH5-C/ΔVDH4
Healthy plants	125	16	17	17	29	9	6
Weak symptoms	7	27	29	35	44	17	13
Strong symptoms	2	89	59	52	63	26	32
Very strong symptoms	0	22	11	15	10	5	4
Number of plants (n)	134	154	116	119	146	57	55

## Sheet: Figure 7
Figure 7
In four independent experiments, 15 tomato plants per treatment were inoculated with water (mock) or independent cultures of each strain.
Plants were categorized as described in the Materials & Methods section under 'Infection of tomato plants'.
	Mock	WT	ΔVDH2	ΔVDH2/5	ΔVDH2/4/5
Healthy plants	85	20	26	29	21
Weak symptoms	5	24	25	27	49
Strong symptoms	0	44	43	44	35
Very strong symptoms	0	13	10	5	0
Number of plants (n)	90	101	104	105	105

## Sheet: Figure S1
Figure S1
Unique gene hit counts were calculated using featureCounts from the Subread package v.1.5.2 and used for differential expression analysis.
Using DESeq2, gene expression was compared between sample groups. P-values and log2 fold changes were generated using Wald tests.
				Normalized hit counts
Identifier	log2(fold change)	P	Adjusted P	SXM-3	SXM-2	SXM-1	Xylem sap-3	Xylem sap-2	Xylem sap-1
0041fb8c-b9f8-4ef4-bc68-9926d2ac11bf-exon	0.124793	0.604898	0.720967	1142.19	611.802	797.792	984.575	868.276	932.127
00506131-d005-4562-bf8e-6df2e91c5631-exon	-0.309167	0.169227	0.278115	199.689	263.99	214.735	176.074	213.761	158.565
00ecabb8-5091-4c01-8f15-cce2771290e7-exon	0.953383	0.035283	0.078212	12.432	12.5251	32.708	29.9445	43.7701	33.3432
00ed12d0-e952-4f58-b304-30a3829566aa-exon	-0.379565	0.0607603	0.122402	195.804	203.292	176.339	146.129	146.579	150.415
0100a445-d313-4e93-a16b-fe997db5624e-exon	0.724617	0.177408	0.288341	11.655	14.452	4.26627	17.9667	16.2865	17.783
01047507-41b7-4b42-ba56-bb47c8a38f50-exon	1.08244	2.34484e-08	2.272e-07	228.438	253.392	268.775	607.274	478.417	501.63
0183f68c-abcc-4ed2-b1fb-b46e9c35627a-exon	-1.23113	1.5932e-06	1.12209e-05	243.201	211.963	339.879	98.2179	135.382	103.734
01ac210c-d86d-486c-8daf-423577108cc3-exon	-0.703348	0.000347269	0.00145409	2213.67	3341.31	2829.96	1767.92	1643.92	1736.81
01bd73b8-fadc-4333-8960-193d38e587b9-exon	0.801391	0.00907494	0.0248003	51.2819	42.3926	32.708	88.6357	62.0924	73.355
01deba22-a8e0-48cf-af43-efc038e56696-exon	0.434489	0.288527	0.420168	20.202	18.3059	25.5976	31.1423	34.6089	20.7469
02d555e6-b65c-4a22-bcdd-fe3b33316702-exon	-1.12633	1.62342e-05	9.32056e-05	176.379	183.059	120.878	64.6801	84.4864	71.8731
02f8f2a6-fd81-4d99-b71f-5072d7f0c227-exon	-0.694401	0.0373597	0.0819618	81.5849	107.908	52.6173	46.7134	63.1103	41.4937
0321f967-66f5-4139-a93a-e99fb04af4db-exon	3.23748	4.6359e-19	1.59455e-17	31.08	12.5251	12.7988	208.414	204.6	140.782
038a1443-113e-45bf-a86f-76ef893e7e84-exon	-0.39266	0.0587271	0.1188	216.006	219.671	193.404	140.14	162.865	175.607
039240ad-b07f-4dae-bfe8-948e3ce6cb4b-exon	-0.441752	0.321373	0.45556	19.425	22.1598	21.3313	16.7689	17.3044	12.5963
03e678b6-6908-4456-98e0-fdeb82685853-exon	-1.37394	1.1165e-07	9.70704e-07	805.748	1216.86	1669.53	493.485	449.915	479.401
0462cbe5-5434-4306-b260-f42b8aaedf20-exon	-0.691844	0.00687866	0.0195564	87.0239	104.055	102.39	61.0867	64.1282	56.3129
04edfaad-5fd7-4007-bc44-73beda1cfb6a-exon	0.618889	0.0184153	0.0451849	76.1459	92.4929	68.2603	101.811	147.597	115.59
05267b2f-79d9-4a60-988e-6af0c6dc9275-exon	-4.78998	4.85227e-15	1.09827e-13	5109.54	1421.12	1915.55	131.756	72.2715	101.511
05283a32-faef-4407-a964-7a17861f30f9-exon	0.23907	0.125305	0.219375	3505.82	3937.69	4141.12	4761.17	4437.06	4471.69
059ae498-dc17-4d14-aeb2-b389e8d85be8-exon	1.72811	0.000214411	0.000948726	18.648	21.1963	78.2149	88.6357	168.973	122.258
069b25e7-23bd-4704-b69d-416a115e3f43-exon	-1.72507	0.00014448	0.000667396	76.1459	96.3468	35.5522	15.5711	13.2328	33.3432
06d2bfaf-a2b7-40e3-a443-b63ff8e20575-exon	-0.227367	0.621165	0.733645	17.871	19.2694	42.6627	26.3511	16.2865	23.7107
06dd1cbd-908b-483e-b349-1398e3d20c71-exon	-0.120664	0.799522	0.867737	12.432	29.8675	32.708	14.3734	27.4835	25.1926
07546c30-29c1-4c55-af91-0166401503df-exon	-0.451687	0.0340544	0.0759545	583.526	842.071	907.293	567.747	598.53	537.196
07b12fd0-c753-4597-b9ba-4ffee702a050-exon	-1.18143	0.0350176	0.0777372	10.878	34.6849	28.4418	14.3734	6.10745	11.8554
07fc0304-fed3-4705-a3b4-0f912ddf179a-exon	0.87319	3.25475e-06	2.16444e-05	235.431	220.634	189.138	397.663	401.056	388.263
086ebe28-01c7-4e7d-b076-32675f89c545-exon	-0.232385	0.391307	0.527847	68.3759	72.2601	61.1498	58.6912	60.0566	54.0901
08d0b99c-ed7a-4b8c-865c-bcdac279234f-exon	1.44396	4.39203e-15	1.00107e-13	259.518	281.333	241.755	658.779	794.986	678.719
08f8d4fc-3ac2-44f4-883b-753fc1c56f63-exon	0.85268	0.0506924	0.105544	26.418	10.5981	15.643	34.7356	33.591	28.8974
093e17af-cf15-4e63-8bdd-52d40b67018f-exon	0.418366	0.42812	0.564725	7.76999	16.379	12.7988	13.1756	14.2507	20.7469
09581de6-c8a3-4d8e-96fc-fdb602ecac38-exon	0.221337	0.675554	0.77579	10.101	10.5981	17.0651	17.9667	15.2686	10.3734
09828490-bf0e-46d6-9c50-373f8d89b4b2-exon	-0.127697	0.76247	0.840334	26.418	17.3424	44.0848	29.9445	25.4477	23.7107
099e5778-46ab-44ec-9fc3-2ead8451c7c5-exon	-2.17575	1.07014e-18	3.58339e-17	465.422	476.917	406.717	80.2512	82.4506	133.373
09cabbf9-e72c-4430-90c0-81f4dad1a325-exon	-0.172639	0.328747	0.463433	685.313	815.094	857.52	647.999	724.751	715.767
0ae3dfa0-ffed-44bc-8fe8-b1f70e1f6594-exon	0.364153	0.426198	0.563029	23.31	17.3424	9.95462	26.3511	20.3582	20.7469
0ae8bdc2-b608-42b4-b122-98b5ab7d7592-exon	-0.0800461	0.870725	0.916193	20.979	14.452	12.7988	10.78	17.3044	17.783
0af8d89d-bea3-4b40-a511-48dc980d9abd-exon	0.514341	0.0676902	0.133458	79.2539	74.187	49.7731	99.4157	112.988	82.2465
0bbb4eb2-0c74-4bea-90f3-f6ba452e19d3-exon	1.39852	0.00293567	0.00943609	16.317	7.70775	15.643	45.5156	37.6626	22.2288
0cbcfcca-3a26-4510-8800-435535f802b9-exon	-0.698257	0.214503	0.333866	9.32399	18.3059	17.0651	8.38446	8.14327	10.3734
0ccc5a59-30e7-49cd-b3ad-fbd267a55e5c-exon	-0.698901	0.000507062	0.00203057	318.57	356.483	291.528	214.403	208.671	174.866
0cf1226c-d4ee-441b-804f-4787ec8d566e-exon	0.0136065	0.960305	0.975035	73.0379	70.3332	81.0591	94.6246	65.1461	67.4273
0d3797c7-7f27-43cf-a0fd-4718aa31e0c6-exon	1.02023	0.000999299	0.00368069	39.6269	26.0136	38.3964	65.8779	77.361	67.4273
0da0cdfe-5a9f-4c99-8c78-c8530d5f6f0b-exon	0.731419	0.000262088	0.0011314	234.654	236.05	217.58	444.376	372.554	329.727
0dd81530-e3dd-4e60-b5af-7efd730bcfee-exon	-1.00993	8.25362e-08	7.37e-07	679.097	704.295	679.759	310.225	309.444	402.341
0e44f442-ee55-4662-aaa4-eb00d28dd5da-exon	0.841149	6.78675e-06	4.23523e-05	352.757	355.52	422.36	597.692	745.109	677.237
0f553431-a6f2-42fa-b2e4-24c7b4f3273b-exon	-0.643221	0.00141374	0.00497541	1369.85	1968.37	2043.54	1141.48	1114.61	1187.02
0fcf6b46-d5d2-4cc1-9d9f-d68cc6de1848-exon	-0.472057	0.0230269	0.0545828	177.933	195.584	217.58	147.327	141.489	136.337
0fd0bf1d-9f10-4b76-ad4e-5d0626106926-exon	0.308789	0.523435	0.651401	21.756	10.5981	12.7988	21.56	16.2865	19.265
10530951-9c03-4b28-9ad6-1979232764df-exon	-0.268087	0.426216	0.563029	45.0659	61.662	38.3964	46.7134	43.7701	31.8613
1064b508-2f60-45f2-9d40-11707ec03286-exon	0.187442	0.296771	0.42942	2326.33	2887.51	2323.69	2911.8	3128.03	2545.94
106a333b-5853-40cd-adc5-86a449600a69-exon	-1.01159	7.77099e-09	8.15417e-08	1627.81	2033.88	1834.49	840.841	888.634	994.368
10ab210d-b597-457c-8518-92d055c49714-exon	1.57842	0.00980903	0.0265389	6.21599	2.8904	17.0651	37.1312	16.2865	20.7469
12d664b3-886c-425c-a5d1-572d1c10193f-exon	-2.16019	2.12466e-08	2.07811e-07	57.4979	62.6254	49.7731	9.58223	12.2149	15.5602
13e369f4-1cd9-4ec3-ae30-893edab26bb2-exon	1.76999	0.000252428	0.00109482	4.66199	14.452	15.643	40.7245	44.788	28.8974
148e475f-da49-4245-921f-2c5fcce8768e-exon	-0.903864	5.48321e-07	4.21515e-06	462.314	474.026	514.796	270.698	269.746	235.625
14a7acdb-2666-4d08-bc3d-e15fbde2b072-exon	-2.48482	NA	NA	1414.91	1115.7	10224.8	603.681	716.607	958.061
14f082dc-07f2-42a3-b99b-e893b898b39e-exon	-0.820603	0.000438472	0.00178509	327.893	449.94	372.587	201.227	270.764	180.053
16179664-b781-48ef-80ef-916278d77a17-exon	-0.228358	0.173526	0.283789	740.48	682.135	797.792	606.076	669.784	617.96
164698d9-225d-4534-a496-83ca6c5cd8e3-exon	-0.160835	0.60511	0.721116	77.6999	49.1369	54.0394	63.4823	53.9491	46.6805
164862e1-ec54-4011-a40e-d4bd0688d3b9-exon	-0.851385	7.3746e-05	0.000364413	210.567	257.246	275.885	124.569	145.561	140.041
1659aaeb-9da8-4728-b144-606fb138550f-exon	-0.05004	0.815236	0.878386	577.31	673.464	915.825	721.063	650.443	716.508
16d6d0b7-ea8d-4a29-a037-1673d89d93be-exon	-0.458995	0.00598696	0.017397	1266.51	1477.96	1402.18	912.708	1052.52	1049.2
171a4773-476b-4603-ab1d-79cc24383e18-exon	-0.478541	0.0116027	0.0306116	1719.5	2485.75	2192.86	1572.68	1535.01	1483.4
17465365-e5d0-40ff-9720-17a1267c189d-exon	-0.613986	0.00195151	0.00662038	1484.07	1702.45	1163.27	895.939	908.992	1038.08
1753d03c-21de-40ef-bf52-a3913d179887-exon	-3.14504	7.41351e-05	0.000365934	10.878	42.3926	12.7988	2.39556	2.03582	2.96384
17b474be-b5ec-4f2e-bd75-c2749fe9b3fc-exon	-0.272903	0.397661	0.534266	49.7279	46.2465	52.6173	31.1423	51.9133	39.2709
17f84cb8-fe51-474a-8957-2861da19923e-exon	-0.336542	0.520902	0.649238	15.54	19.2694	9.95462	14.3734	9.16117	12.5963
1849299e-b9ee-4542-b78a-26cd85364a87-exon	0.267464	0.495372	0.626359	24.864	17.3424	28.4418	29.9445	25.4477	28.8974
1856a888-4024-407d-b52d-516a3d2ddf39-exon	0.112418	0.72465	0.812982	59.0519	87.6756	48.351	81.449	52.9312	77.8008
18a6b3b7-f695-4115-8fdc-8a472dffff32-exon	0.226896	0.323352	0.457796	192.696	160.899	146.475	192.842	230.047	165.975
18bdf1d6-41b9-4071-b059-91b26e2ce1f1-exon	-1.68173	1.718e-10	2.2586e-09	142.968	220.634	170.651	56.2956	52.9312	57.0539
18bf509d-4d3b-417c-b1fb-2d397dfa92cc-exon	-2.04039	1.1642e-09	1.37708e-08	78.4769	139.703	145.053	23.9556	34.6089	28.8974
18c68b36-b5ab-4a66-9c15-20fc7d437dd0-exon	-1.8066	2.99763e-08	2.85232e-07	4104.11	2071.46	6204.57	1266.05	978.21	1293.72
1927576e-9c6d-4520-88bc-3a6cbcc7d3fc-exon	0.0801745	0.822116	0.882791	43.5119	33.7214	34.1301	46.7134	26.4656	45.1985
199494f0-7b3b-47fc-987a-f3eb2aabb071-exon	-0.584583	0.00104009	0.00381613	358.196	337.214	358.366	232.369	232.083	237.848
1a094217-9976-423b-b41a-ee5cab7ed7a4-exon	-0.440959	0.0275377	0.0633687	686.09	521.236	548.926	373.707	447.88	471.991
1a27d389-3a8d-492c-b3c6-1f6ca0b3237c-exon	-0.852042	0.0379969	0.0831274	37.2959	44.3195	25.5976	15.5711	27.4835	17.0421
1a8f3d81-092b-47d3-b34c-19c717e1c06d-exon	0.43418	0.02956	0.0673822	676.766	489.442	693.979	903.126	823.488	786.158
1ac8eb00-7c2e-469e-977e-1242207e6be0-exon	-4.5017	4.89362e-20	1.82968e-18	337.994	138.739	136.521	13.1756	2.03582	11.8554
1ae0bfd0-bf25-430d-a13d-dfbf8ca23f48-exon	-2.04577	2.32856e-18	7.56365e-17	3765.34	5468.65	3390.26	1231.32	896.777	931.386
1afd788e-10c5-4934-8993-bb51e4b321b3-exon	-3.63112	NA	NA	1131.31	755.359	11326.9	250.336	253.459	562.388
1b048dbb-a8fb-4f56-9a39-e7a6c555fb4e-exon	0.661779	0.0800334	0.152947	34.1879	22.1598	18.4872	35.9334	37.6626	46.6805
1b4e64ec-ff6b-4a67-a40d-80b6e3a4c32b-exon	-3.19206	0.000222798	0.000980901	6027.96	2890.4	20960.2	990.564	743.073	1535.27
1bedb0e2-cfff-451c-8681-7ac599a79769-exon	0.110365	0.610442	0.725034	193.473	232.196	200.515	183.26	247.352	243.776
1c678965-7202-46cb-b871-f387389e43b5-exon	-0.0115683	0.960644	0.975121	119.658	126.214	115.189	98.2179	136.4	122.999
1cead100-a554-4a9d-8d99-a8220869dad8-exon	-0.393445	0.0778847	0.149569	199.689	243.757	290.106	190.447	164.901	200.059
1d3084d7-3efc-4ee3-8cc7-96a434e4091e-exon	-1.34806	4.69566e-07	3.66667e-06	298.368	458.611	247.443	113.789	141.489	139.3
1d46c09e-07bb-42ec-b044-19ab711f9bf3-exon	0.455298	0.294595	0.426875	17.871	20.2328	12.7988	19.1645	24.4298	26.6745
1d4e3ba1-b0a5-4197-92ff-e4746262da6e-exon	-0.00343903	0.985567	0.990701	451.436	393.095	351.256	364.125	423.45	407.528
1d50e53d-54f4-45a2-af49-af99a0343cef-exon	-0.900222	0.000843637	0.00316677	121.212	184.986	119.455	76.6579	83.4685	68.9092
1d9d1006-1042-4ffa-90ab-f4cdb4c12995-exon	0.722981	0.0720364	0.140446	15.54	21.1963	17.0651	29.9445	31.5552	27.4155
1dfa662c-b486-4905-a38f-dd06c9928337-exon	0.54068	0.0240701	0.0566314	130.536	150.301	116.611	239.556	177.116	165.234
1e183796-62e0-4a57-9897-b174b1e394f0-exon	6.17776	1.06728e-06	7.80158e-06	0	0.963468	0	27.5489	31.5552	20.7469
1e24090d-7c83-4976-9ebb-c34c952be2dd-exon	-0.649913	0.0362039	0.0798491	62.1599	60.6985	48.351	31.1423	39.6984	38.5299
1e458c05-3732-477b-ba87-7b8ad2069315-exon	1.43998	0.000320322	0.00135169	23.31	10.5981	17.0651	50.3067	50.8954	39.2709
1e808c49-8163-42ec-a484-0da83b7ad17b-exon	1.34367	0.0356259	0.0787956	3.88499	5.78081	8.53253	22.7578	11.197	11.1144
1eecf000-a2ab-4748-a9e5-64646c615c5f-exon	0.414898	0.131987	0.228596	1732.71	1009.71	806.324	1536.75	1404.71	1794.6
1f1769b3-684a-479f-b86a-6c3875787f00-exon	-0.805602	0.00904189	0.0247219	188.811	384.424	435.159	190.447	229.029	156.342
1f8f8bb6-2145-418a-882a-c2eaa92da36b-exon	0.0372283	0.864647	0.911905	152.292	151.265	133.676	153.316	165.919	131.891
200e1f6c-d138-499c-a8d5-7006f032be89-exon	-0.350039	0.46834	0.601777	17.871	23.1232	18.4872	23.9556	10.1791	13.3373
205a6c11-fd0e-4236-af1c-4aa8959a30a5-exon	-0.793007	0.00609589	0.0176797	136.752	181.132	102.39	97.0201	84.4864	63.7225
20729686-eb8f-46d4-828a-786c58f85395-exon	-0.7529	0.00432289	0.0131559	136.752	233.159	186.294	116.185	120.113	94.1019
208fa0a6-55d6-4cb3-8c0f-234ed6d189bc-exon	-0.355915	0.316692	0.450701	115.773	62.6254	45.5068	63.4823	53.9491	60.0177
20b9323a-6ee2-4f11-b282-bd4b96dc5ef2-exon	0.571159	0.174113	0.284625	14.763	17.3424	29.8639	25.1534	29.5193	34.0841
215df876-7044-4f05-a817-742ea46ebe78-exon	4.06521	4.22668e-28	2.76556e-26	18.648	18.3059	58.3056	596.494	538.473	394.191
21689729-c436-4132-9cf4-15dfafaaffd2-exon	-0.244731	0.150344	0.253655	472.415	459.574	456.491	418.025	382.734	372.703
2184f988-eced-4508-b5aa-45d52dca1581-exon	0.472368	0.328057	0.462759	13.986	18.3059	22.7534	13.1756	38.6805	22.9697
21ae7d11-2cb7-4594-bb7c-3c4608ce3e06-exon	-1.30659	4.90449e-07	3.81405e-06	2351.2	2706.38	4614.68	1175.02	1441.36	1291.49
21b05620-adbc-4248-8aab-3a9b16876a84-exon	-0.276451	0.488457	0.619792	25.641	36.6118	22.7534	19.1645	27.4835	23.7107
21ed0ae5-9779-4e83-878f-20e8db119a38-exon	-0.570502	0.00328294	0.0103819	364.412	442.232	375.431	240.754	294.175	260.818
22044f5f-624b-4054-a5a7-2cf61c32929f-exon	1.04674	0.0690165	0.135642	8.54699	3.85387	15.643	20.3622	22.394	13.3373
2286164b-c8bf-407f-abc9-3874e94596bf-exon	2.23184	6.32406e-18	1.9672e-16	44.2889	47.2099	63.994	243.149	276.871	200.8
229b3023-97f6-4d52-bda6-99c449d24ca8-exon	-0.620124	0.000701855	0.00270045	439.004	482.698	544.66	300.643	321.659	328.986
22e20b40-b4e9-4ad8-85fb-bc907c113d11-exon	0.534832	0.0776115	0.14922	82.3619	69.3697	140.787	170.085	129.274	120.776
22feb55d-c2e9-4993-9c49-ae9eccd7dc44-exon	-0.857735	0.00399905	0.0123019	94.0169	73.2236	73.9486	50.3067	33.591	49.6443
2332ee49-44aa-44a3-a22f-aeeb806d9ddc-exon	0.436361	0.345454	0.481129	17.871	32.7579	14.2209	44.3178	22.394	22.9697
241f3c74-c5bb-4ccd-957d-9e19034f758c-exon	0.315057	0.500808	0.63142	21.756	15.4155	9.95462	22.7578	19.3403	18.524
24721d74-1282-4fd5-844a-d0dfada7c362-exon	-1.06799	7.7364e-05	0.000380224	130.536	147.411	115.189	81.449	50.8954	57.0539
25133f66-286b-4223-9a73-7da18c2b7e04-exon	0.231464	0.461126	0.594767	128.205	82.8583	68.2603	98.2179	87.5401	143.746
253d15bf-6574-4f5c-a0ea-377f151c9396-exon	0.0628288	0.90669	0.94144	13.209	18.3059	9.95462	20.3622	8.14327	15.5602
2578f38d-afc5-4106-9e49-9b15059c7dd9-exon	3.84395	3.68642e-09	4.06882e-08	1.554	2.8904	4.26627	32.34	52.9312	31.1203
2582b047-12b4-46f2-bc37-7575c5755695-exon	-0.377542	0.0656406	0.130183	214.452	263.027	254.554	167.689	193.403	200.059
25e137b1-a5b2-47c3-a3b7-5ed0cfdb9bf0-exon	-1.43626	5.32379e-14	1.08042e-12	605.282	536.652	692.557	210.809	238.191	227.475
2601a580-0af0-4ac2-bf8c-b41a13f466b0-exon	-1.01581	5.3777e-07	4.14243e-06	489.509	608.912	655.583	258.72	280.943	324.54
26ecbb01-ede3-4ffc-8575-2f9042af0a11-exon	-1.04935	4.15459e-05	0.000217172	182.595	200.401	307.171	113.789	108.916	108.921
27382450-6e2c-4e9f-91cb-fda73aad0f34-exon	-0.334915	0.23936	0.363591	104.118	195.584	137.943	98.2179	112.988	134.114
2744eb17-9171-4616-8e29-42614e698d5f-exon	-0.801493	0.00161577	0.00559136	1296.81	708.149	1191.71	504.265	647.39	680.942
276bf9e7-ffe7-456f-9945-595bd68b57a1-exon	0.655247	0.023216	0.054968	97.1249	59.735	130.832	152.118	146.579	150.415
277964f3-9520-4243-b2c5-5b0053c120bc-exon	0.156291	0.632611	0.742311	46.6199	35.6483	42.6627	38.3289	42.7521	57.0539
282abf5a-b33e-4fce-8405-9e5d9bf36e40-exon	0.00268318	0.988902	0.992563	853.145	687.916	820.545	833.654	661.64	869.887
282e4726-f503-4836-961f-867a3ed9cfe9-exon	-0.232229	0.261862	0.389458	251.748	292.894	213.313	203.622	219.868	223.029
29231595-06b6-427e-b4c3-aacf5cc6b357-exon	-0.99493	0.00174003	0.005979	85.4699	82.8583	69.6824	46.7134	25.4477	47.4214
294373b5-b3f7-402e-8fa4-d296fd51f099-exon	-0.597195	0.00245447	0.00807751	2170.16	3235.33	2923.81	1862.55	1728.41	1913.16
29590b60-3c85-4c33-b2bd-542354ecbc6e-exon	0.321176	0.449764	0.584439	24.087	26.0136	12.7988	20.3622	30.5372	28.8974
2a24dd75-f61e-4018-b95c-584185d494f3-exon	-0.743656	0.10032	0.184024	22.533	28.904	28.4418	8.38446	21.3761	17.0421
2a8a1e31-45b9-4e07-b695-9ecb2f3269c2-exon	-0.468337	0.00224316	0.00746625	3902.87	4515.78	4317.46	2977.68	3046.6	3179.46
2ad7ca9a-128f-408f-97f0-0b7619f9964c-exon	2.64318	2.43409e-09	2.75879e-08	7.76999	5.78081	21.3313	58.6912	81.4327	62.9816
2b600838-c06a-4582-8154-b5cbc02ca7b3-exon	-0.037276	0.893607	0.932727	80.0309	59.735	59.7277	71.8668	63.1103	61.4997
2b6b4d7a-5766-47d0-819b-4f2b11b389ec-exon	-0.618854	0.00157527	0.00547284	298.368	284.223	338.457	219.194	195.438	185.24
2c12b1cf-4030-4ed5-b61d-94f9226a45ec-exon	-0.784707	0.110582	0.198702	17.871	28.904	15.643	11.9778	10.1791	14.0782
2c1ea6c5-451c-4ef0-b042-cbc2fe7ecccd-exon	-0.121949	0.554081	0.67761	163.17	180.169	183.449	158.107	175.08	150.415
2c4370e5-316f-4e53-84d6-a741882e4f8d-exon	-1.04264	7.56733e-05	0.000372558	103.341	117.543	133.676	61.0867	46.8238	62.9816
2cd76985-83cb-41c2-a6c0-e38189cd9b0b-exon	-1.62161	1.07306e-06	7.84132e-06	88.5779	182.095	189.138	59.889	45.8059	43.7166
2d3a1239-b7de-434f-85f1-eae58d81bf95-exon	-0.371474	0.0650836	0.129225	1638.69	2057	2487.23	1634.97	1683.62	1458.21
2d4db91f-3773-4d8f-a018-cf0a1d113786-exon	-0.818069	0.00800519	0.0222562	65.2679	81.8948	98.1241	58.6912	35.6268	44.4576
2ddc01f5-2c72-463d-9b3b-28681d8ad1a3-exon	0.788736	0.199298	0.314775	9.32399	5.78081	7.11044	7.18668	16.2865	14.8192
2dfa3fee-c52a-4776-87f0-fac808d4a9e9-exon	-0.302141	0.258886	0.385913	94.0169	98.2738	116.611	103.009	64.1282	82.9875
2e1926c1-8b27-43d0-be83-2c264fa90244-exon	-0.92543	0.000168038	0.000764635	308.469	388.278	304.327	131.756	225.976	168.939
2f7cb3c4-cc28-43a4-a074-9d3a18cb8ba7-exon	-0.467303	0.00945695	0.0257362	374.513	408.511	374.009	267.105	268.728	300.089
2faaa66e-f9ce-44d6-bd0e-853626991fd2-exon	-0.642124	0.0575868	0.116867	54.3899	96.3468	75.3707	33.5378	47.8417	61.4997
2fc6ea58-fe45-478a-bff6-f33c221c86ed-exon	-1.03763	9.36641e-05	0.000452329	132.867	184.022	145.053	56.2956	87.5401	80.0236
2fcee566-75e0-427a-a04e-4409e6367795-exon	0.329533	0.139342	0.238557	104.895	110.799	112.345	153.316	127.239	131.891
2ff44061-219e-49a4-874c-3cdbb4012497-exon	-0.740982	0.0111364	0.0295956	83.1389	75.1505	71.1044	52.7023	50.8954	35.5661
30693d87-f2ee-43bf-b133-9d5a3babb0fe-exon	3.86555	8.58485e-17	2.35799e-15	5.43899	6.74428	7.11044	125.767	86.5222	65.9454
30a0b360-140b-4a58-addd-55a88050a508-exon	-0.216193	0.207681	0.325413	2585.08	3175.59	3085.93	2298.54	2722.9	2591.14
312935c2-a4fe-46cd-95df-a4e1e60ba376-exon	-0.361291	0.109211	0.19675	281.274	227.378	186.294	195.238	178.134	171.162
314cd332-fce2-4462-86f9-da385df630a5-exon	0.743047	0.00139165	0.00490902	90.9089	75.1505	93.8579	132.954	147.597	152.638
319c15f7-500e-42c2-a1b8-ccf829b85c99-exon	0.857902	0.00957668	0.0260154	24.087	33.7214	31.286	47.9112	61.0745	51.1262
31a60e52-ff9c-4c60-a847-1f08aaef00a2-exon	-2.62951	1.19077e-16	3.22784e-15	188.034	195.584	146.475	44.3178	20.3582	22.9697
31abf27e-4273-4626-be63-633be480fcda-exon	-0.270388	0.252987	0.379455	171.717	159.936	119.455	138.942	122.149	116.331
3239f8f9-0943-41e7-aa1a-f02423cfda59-exon	9.33725	4.62021e-19	1.59156e-17	0	0.963468	1.42209	413.234	571.047	307.498
331bcf4c-d150-410e-8346-111bc5bad6c5-exon	-0.159271	0.394047	0.530505	355.088	347.812	420.938	315.016	361.357	327.504
33693aa7-d522-4eaf-b1b1-16a190dd036c-exon	-0.0782604	0.645525	0.75292	770.783	686.953	752.285	674.35	767.503	652.045
33afcf6f-9158-451a-9f12-3bb12a79bcf6-exon	0.771087	0.000457169	0.00185226	696.968	613.729	931.468	1473.27	1074.91	1272.97
3409092e-c37d-4d48-9909-f7a1a3998ff5-exon	0.864605	0.015852	0.0397435	20.202	39.5022	27.0197	61.0867	47.8417	48.9033
35bed9ba-14b6-4b0c-a17e-b75469206c88-exon	-0.553777	0.0302023	0.0686368	118.881	104.055	91.0137	64.6801	81.4327	68.9092
35ec4efd-9184-41dc-8ace-67422d2f5661-exon	-1.24187	2.09162e-08	2.05108e-07	191.142	183.059	206.203	83.8446	73.2894	87.4332
35ee7929-f0e8-401b-a267-336470da30c1-exon	0.280772	0.304535	0.43752	217.56	218.707	109.501	232.369	217.832	217.842
3623bad5-8e4b-4e19-bee1-ef388c5790ef-exon	0.334855	0.199132	0.314593	108.003	97.3103	156.43	172.48	126.221	154.12
37962408-bb5c-4253-b94e-4f93dd66c23f-exon	-0.0372781	0.939791	0.962533	19.425	32.7579	9.95462	14.3734	25.4477	21.4878
37a255b4-d0c2-4c40-a18c-ff4ad45c22c6-exon	-0.792185	9.14129e-06	5.558e-05	1352.75	1382.58	1668.11	756.997	900.849	881.742
381a5642-c8fd-4255-b5b2-92443482156a-exon	-1.27821	2.2059e-06	1.51793e-05	103.341	124.287	125.144	43.1201	42.7521	57.7949
38484e38-46e1-46c3-a9b4-99d3db54682b-exon	-0.379088	0.0460712	0.0975489	353.534	313.127	356.944	237.16	259.567	288.233
386546fd-9abc-4d2c-bc38-41c828a69779-exon	-0.684921	0.106664	0.193202	26.418	23.1232	25.5976	17.9667	14.2507	14.8192
389a9c7e-5c69-409e-b857-1475fe2a0877-exon	-0.123316	0.828838	0.887373	13.209	10.5981	9.95462	14.3734	10.1791	7.4096
38d1344e-03c3-42a0-bc38-d8bde5929314-exon	-1.53142	3.22622e-09	3.59927e-08	696.968	1412.44	958.488	353.345	339.981	367.516
38ed4171-d347-415d-9b4e-3356118ebdaa-exon	-1.89312	4.09537e-06	2.67044e-05	38.0729	84.7852	91.0137	19.1645	15.2686	22.2288
392571df-cb07-4fed-8179-8fe883f81465-exon	0.277297	0.251096	0.377341	157.731	204.255	132.254	177.271	234.119	189.686
39783ae3-a798-4dca-af7d-caac99f8bfce-exon	0.0166143	0.978027	0.985602	15.54	5.78081	9.95462	8.38446	13.2328	10.3734
3a001646-981a-4391-aa4f-be4a9c98c998-exon	-0.655622	0.00149913	0.0052419	242.424	293.858	234.645	149.722	168.973	170.421
3a0bee84-a844-4460-a40d-5f667a27c668-exon	0.0881047	0.770347	0.846523	94.7939	66.4793	142.209	122.173	98.7371	99.2886
3a1973e1-c124-4fef-b8e3-620c57d8d7d8-exon	-0.595006	0.28405	0.415083	15.54	13.4886	11.3767	7.18668	9.16117	10.3734
3a344b81-8f43-4a0c-9502-51d3619f7ee6-exon	-1.35699	2.28259e-08	2.21546e-07	299.145	444.159	302.905	160.502	121.131	128.186
3a9da8f2-1271-4ba4-b97b-f17751962b36-exon	0.326299	0.1635	0.270775	83.9159	86.7121	92.4358	101.811	117.059	109.662
3ab2ea8b-a71b-44cb-9e33-33e020cd9cd8-exon	-0.800257	0.00287598	0.00927301	111.888	122.36	91.0137	63.4823	73.2894	51.8672
3ad465f9-735b-47e8-b07e-4b153a1d138e-exon	-0.0456995	0.883925	0.925889	66.0449	75.1505	38.3964	57.4934	61.0745	57.7949
3ad74f77-2909-41ed-ba88-979839ed4604-exon	-0.28819	0.213126	0.332062	225.33	197.511	163.54	131.756	175.08	174.126
3b39b9b3-97bf-43dc-ab20-33ee6b619585-exon	-0.990494	0.000251149	0.00109051	114.996	105.018	91.0137	62.2845	43.7701	51.8672
3b5d1f38-1b62-4e96-850e-b1f9be861320-exon	0.314009	0.24308	0.368112	64.4909	74.187	51.1952	77.8557	78.3789	81.5056
3b87fbe0-409b-4e88-a67d-a0d3d44a8b82-exon	-2.63222	0.000781962	0.00296354	3912.97	1882.62	12530	918.697	860.132	1176.64
3bdc7580-dfda-40ec-a7fa-6d5e17f8ee49-exon	-1.22592	4.76395e-10	5.86353e-09	1069.93	1226.49	1144.78	428.805	598.53	443.835
3c6357b1-b3d0-445f-91c9-55a5ab659a04-exon	-1.84165	0.000336592	0.00141589	27.972	20.2328	29.8639	8.38446	5.08954	8.15056
3c6903f4-1bc8-4ec4-9e86-b112a7ccfa6b-exon	0.512046	0.264024	0.391905	12.432	12.5251	18.4872	20.3622	20.3582	20.0059
3d4bdf45-df00-4c5b-a4fd-d35cd43f8235-exon	0.612788	0.0141673	0.0362546	70.7069	81.8948	61.1498	110.196	101.791	116.331
3d6a1e69-46c2-4f8a-ab90-2c444f7afbcd-exon	-0.164673	0.404933	0.542021	232.323	202.328	219.002	208.414	195.438	180.794
3dc2632e-2bbc-4d5a-8070-fabb5b6809e3-exon	-0.872326	0.00718246	0.0203035	62.9369	91.5295	79.637	50.3067	49.8775	28.8974
3efb79e6-1dd1-4fba-a09b-44983d84ab2f-exon	0.332743	0.0743867	0.144054	664.334	501.003	657.005	733.041	770.557	789.863
3f1396da-d1a1-4bed-93cf-1f65fe7e5074-exon	-1.46107	4.63735e-10	5.72316e-09	361.304	531.834	374.009	177.271	134.364	149.674
3f51e5fc-981c-47a4-bcb9-e26773d1d214-exon	0.0320727	0.958996	0.974227	8.54699	22.1598	4.26627	10.78	12.2149	13.3373
3f8a0e0c-dc0e-4d92-aff1-3d8f458b0421-exon	-0.909839	0.000169191	0.000769263	121.989	158.009	139.365	73.0645	69.2178	80.0236
3fb49207-c9c7-4559-841e-ec7c217dfa01-exon	1.04428	0.000658109	0.0025536	45.0659	46.2465	29.8639	95.8223	91.6117	67.4273
3fc5738a-a7a5-4e35-8a4d-4a3df52d64a9-exon	-0.905535	4.11945e-07	3.25242e-06	445.22	408.511	420.938	238.358	226.994	216.36
3ff31a4c-bfd7-4330-8c18-70c94c31d3d1-exon	-0.822799	0.000929388	0.00345505	191.142	171.497	277.307	129.36	112.988	117.813
4021fc81-33e7-4307-89dd-24839351401a-exon	-0.891164	0.0261047	0.0606003	44.2889	55.8812	35.5522	38.3289	17.3044	19.265
4055d483-0052-4028-9d0f-3346feaa50e1-exon	0.26872	0.355402	0.491467	54.3899	41.4291	51.1952	62.2845	54.967	60.0177
408bded0-86cb-41f6-a331-0e48b630d9df-exon	-1.18731	0.0495187	0.103549	13.986	13.4886	15.643	3.59334	9.16117	5.92768
40b16124-86f9-4747-8dc6-02a658907bc1-exon	-0.681824	4.11984e-05	0.000215504	738.149	712.003	820.545	469.53	482.489	462.359
416ff98e-1353-400a-a7aa-c64635d59747-exon	0.292795	0.232739	0.356027	254.856	188.84	147.897	217.996	244.298	266.005
4191674e-0296-4981-ac16-a39ecef117e0-exon	0.0453219	0.879307	0.922448	55.1669	74.187	62.5719	50.3067	82.4506	64.4635
41e2bba3-a666-44c6-9bf5-29f2dbbdde5e-exon	1.38608	0.0101857	0.0273954	3.88499	21.1963	9.95462	26.3511	34.6089	29.6384
4266facb-860b-480d-8943-c08bd5eb736d-exon	0.886928	0.0229402	0.0543999	21.756	16.379	18.4872	39.5267	37.6626	28.8974
4331e62e-9468-4806-9ccf-4d07c61d50eb-exon	0.0471795	0.86747	0.913951	91.6859	56.8446	86.7474	91.0312	72.2715	80.0236
43701064-1c91-4210-91dc-acb33cacc2d2-exon	0.769833	4.33556e-05	0.000225854	1343.43	1116.66	1605.54	2427.9	2244.49	2254.74
438c5369-934e-4f99-a0ca-cbed3ec2fcca-exon	-0.0557076	0.788968	0.860247	585.08	422.963	409.562	492.287	443.808	431.979
440a954f-0348-4dab-b296-a216aef5ea6c-exon	0.488097	0.0422545	0.090776	302.253	270.735	391.074	570.143	364.411	415.678
4413ab9f-da94-4446-b67b-e9921c550b98-exon	0.337528	0.395271	0.531824	27.195	19.2694	18.4872	29.9445	28.5014	25.1926
44184a98-1eed-487b-afaf-e159273d3039-exon	-0.694612	0.00402017	0.0123564	141.414	117.543	123.722	68.2734	82.4506	85.2104
4430efdb-7985-4875-955d-410da8d97383-exon	1.48627	0.000159039	0.000728051	18.648	13.4886	21.3313	63.4823	49.8775	36.307
4431a25d-a39f-44ef-bf9a-2090ccf0e832-exon	-1.32287	0.00124976	0.00446804	46.6199	36.6118	76.7928	16.7689	29.5193	17.0421
44420e4c-a431-4aa1-885b-7f28fd541ad8-exon	1.90613	0.000555607	0.00219868	6.21599	2.8904	14.2209	33.5378	24.4298	24.4517
44ae6067-5cec-45fb-82e6-355dd46cfae8-exon	0.374973	0.287671	0.419083	109.557	369.972	244.599	282.676	350.16	304.534
44b1428a-eca1-4d70-aacc-0db25dcf8c2f-exon	-0.734675	0.00959074	0.0260412	93.2399	127.178	75.3707	59.889	58.0208	60.7587
44df75db-82ed-4a68-b410-2341d73deb24-exon	0.587995	0.00789186	0.0219841	126.651	156.082	125.144	215.6	221.904	177.83
44e27718-9258-4198-b5ee-b8d3af3d673c-exon	-0.423403	0.016503	0.0411401	1867.13	2474.19	2198.55	1531.96	1636.8	1705.69
4566ff47-305d-4650-9061-6272cac67855-exon	0.275609	0.498081	0.628779	41.9579	68.4062	85.3253	58.6912	129.274	47.4214
458cf9b5-6c0e-4a50-8e70-59dc41dcb5c1-exon	-1.19323	6.73181e-11	9.35795e-10	707.846	841.108	678.336	348.554	307.408	319.354
45ab3fe5-c7a1-4058-8169-283223bec8ca-exon	-0.608091	0.191129	0.305061	21.756	39.5022	15.643	17.9667	15.2686	17.783
45c2f648-2ec5-4a52-a1e2-d7c023818a91-exon	0.795582	3.00722e-05	0.000162995	223.776	265.917	268.775	481.507	426.504	406.787
45eedece-8ec0-4abe-8aa1-f9e900375d0f-exon	0.165196	0.360429	0.496819	470.084	424.889	403.873	438.387	491.65	526.822
464186bb-3c72-4bb9-b393-558c49f4d15a-exon	-0.482809	0.0205929	0.0496598	184.149	221.598	216.158	150.92	136.4	156.342
465f967d-e1b4-4d25-ab0b-feb1ded1dff1-exon	-0.61157	0.00585395	0.0170803	499.61	743.797	792.104	481.507	410.217	438.648
46737b84-a299-46a1-b1c4-e928232619ad-exon	0.400188	0.138968	0.238132	56.7209	91.5295	82.4812	97.0201	106.88	98.5476
46b5344b-3615-4ecc-8bc5-55951e15e766-exon	-0.833021	0.0560299	0.114278	20.979	42.3926	38.3964	21.56	22.394	13.3373
46bcd8fb-507e-4be6-9e88-2869b718a615-exon	-0.0245042	0.893527	0.932686	632.477	506.784	661.271	604.879	565.957	597.954
4756196d-17cd-4959-aca1-c1e00e2c8406-exon	-2.07558	6.4419e-10	7.82304e-09	83.9159	67.4428	102.39	22.7578	17.3044	20.0059
47616dc5-53b9-41a0-98cc-880d7c32797c-exon	-1.07355	8.95051e-05	0.000433624	125.874	128.141	108.079	61.0867	41.7342	68.9092
47722bf4-4021-4ea6-886d-d327409455ae-exon	1.89498	6.32018e-12	1.00637e-10	36.5189	69.3697	59.7277	201.227	189.331	218.583
47e9b5b3-f915-4445-9c6d-5049907d815f-exon	1.43313	1.1388e-07	9.88202e-07	49.7279	37.5753	44.0848	111.393	134.364	110.403
483fe128-83af-4e28-beb3-54604526571f-exon	-0.729902	0.0444232	0.0945784	202.797	115.616	65.4161	86.2401	71.2536	76.3188
489a8883-6531-45fe-9570-27b8c1f1889e-exon	1.0263	0.00081151	0.00306131	12797.9	14187.1	30465.4	40556.8	43501.3	32947.5
48ab6e1b-3c98-40e5-bb32-69a06e6d0f43-exon	-0.484201	0.382088	0.518761	9.32399	19.2694	17.0651	8.38446	9.16117	14.0782
49159a04-a7b2-4d1e-9379-7ebb1bb8a154-exon	-1.52087	4.03141e-08	3.77137e-07	175.602	264.954	321.392	73.0645	101.791	88.9152
49b09914-aaf1-41d0-b500-5908d0e19d3f-exon	1.69364	2.40369e-12	4.03926e-11	54.3899	59.735	75.3707	206.018	218.85	181.535
49c0847e-deb1-49d4-bcda-e66a96ea77e6-exon	0.0130359	0.977864	0.985558	18.648	13.4886	39.8185	19.1645	23.4119	27.4155
49e8b8a5-e86c-40af-b002-29638e09bfe9-exon	-0.502343	0.00492067	0.014702	700.076	839.181	837.61	577.33	505.9	592.768
49f2c91f-79a7-4647-be65-713fb2b114de-exon	-0.509859	0.00830588	0.0229716	3088.57	4552.39	3903.63	2715.37	2538.66	2851.95
49ffe140-c726-480e-a6ee-81d0efcae2ae-exon	-0.508329	0.242586	0.36756	27.972	26.0136	27.0197	15.5711	28.5014	13.3373
4a3c32e0-96c7-4544-9ecb-852bd571622b-exon	-0.967757	0.00331387	0.0104699	71.4839	75.1505	44.0848	31.1423	35.6268	31.8613
4a6ad231-bff6-4f1e-bbc5-b1f1befeaa9e-exon	1.69296	3.80848e-12	6.25227e-11	48.1739	47.2099	59.7277	172.48	165.919	158.565
4a6ed26a-ddf5-4f36-af97-710cea7aab2a-exon	-1.48523	1.93747e-07	1.61316e-06	93.2399	120.434	137.943	41.9223	35.6268	46.6805
4a988c50-e36d-41c7-b3fc-f86ec9900fd1-exon	-0.625821	0.0246417	0.0577076	372.959	652.268	783.571	468.332	346.089	356.402
4b418c01-6e04-433c-bce9-0d66ccb50380-exon	-0.401657	0.229916	0.352775	52.0589	89.6025	45.5068	47.9112	44.788	49.6443
4b808671-9648-4db7-a300-1fa2137f68ca-exon	0.165484	0.33359	0.46859	9524.45	11598.2	8795.62	11060.3	11010.7	11485.6
4c481bb8-56af-4be9-a2db-b326786be18d-exon	0.127451	0.560037	0.68295	163.947	130.068	166.384	155.711	163.883	181.535
4c50f7f9-86f4-44e3-bfb9-05745e2bc8a2-exon	0.28641	0.129491	0.225367	327.116	328.543	268.775	389.278	394.948	347.51
4c84a82b-030a-4d28-aa38-4a8852cd261e-exon	0.0931677	0.71079	0.802507	78.4769	94.4199	108.079	93.4268	92.6297	110.403
4ca7edbe-be37-4538-9968-0f8a574eb591-exon	0.679182	0.0045231	0.0136412	96.3479	107.908	147.897	185.656	200.528	172.644
4cdbe54d-ab17-4e2d-838e-deac25e75b0a-exon	-0.168393	0.382599	0.51927	686.09	761.14	618.609	530.616	597.512	709.098
4d2fbab1-3c41-4159-a7ae-b3cf9999feb6-exon	-0.0868668	0.794042	0.863808	62.9369	66.4793	58.3056	85.0423	37.6626	55.572
4d6f6daa-aa5c-41f4-9bf1-111ea99efa71-exon	1.61686	1.4356e-06	1.02152e-05	24.087	60.6985	34.1301	113.789	126.221	123.74
4d8f9515-5ffe-4944-824b-de1bf88fff98-exon	1.87974	0.00352161	0.0110344	4.66199	3.85387	4.26627	15.5711	19.3403	12.5963
4dbcc426-9fd7-4b49-a8cb-651798a64c52-exon	0.128933	0.811756	0.87617	10.878	9.63468	17.0651	17.9667	9.16117	13.3373
4dec9312-ea9e-461c-bc16-464e4aa7a33a-exon	2.16629	1.02177e-05	6.15167e-05	6.99299	7.70775	7.11044	27.5489	40.7163	29.6384
4e473670-af02-49f4-85fd-d0b1439f765d-exon	0.340063	0.655795	0.760812	5263.39	3254.6	19333.3	13425.9	9072.62	12754.1
4e63c280-e22c-4e5a-8afb-edcc8ea22184-exon	-0.0154197	0.959753	0.974819	48.1739	52.0273	39.8185	47.9112	41.7342	49.6443
4e870722-d05b-4820-9963-1e667e78ab01-exon	-1.60316	3.17289e-06	2.11805e-05	112.665	168.607	79.637	28.7467	39.6984	49.6443
4eb7f606-3649-4423-bbd1-20b29e7b2d8c-exon	-0.675091	0.00053915	0.00214062	276.612	335.287	298.639	184.458	183.223	201.541
4ed5de05-f2b6-486e-b822-2155c074be28-exon	0.0342225	0.900962	0.937487	69.1529	67.4428	65.4161	57.4934	83.4685	65.9454
4f022855-9371-41da-9b25-62ff34f2ba3f-exon	0.291109	0.162375	0.269266	306.915	394.058	466.445	497.078	468.238	458.654
4f2af7ec-013e-4e45-8d53-06afe24b39d6-exon	-4.65822	6.98935e-39	8.55631e-37	7251.73	2291.13	2950.83	172.48	158.794	163.752
4f7ea447-4290-4e93-b04a-8b38699b2700-exon	4.93763	3.05287e-05	0.000165038	7.76999	0	19.9092	315.016	272.799	244.517
4f9abfef-b391-4357-ae6d-2c651a4897dd-exon	0.971168	0.0350262	0.0777487	21.756	14.452	7.11044	29.9445	33.591	25.1926
4fd25c06-e662-4afd-b7ff-460163440cd9-exon	-2.14025	7.17154e-17	1.99385e-15	206.682	179.205	199.092	52.7023	33.591	46.6805
4fe581f9-be96-4e79-9d67-70c68d59d0fc-exon	1.85624	1.31286e-26	7.74448e-25	270.396	300.602	288.684	1136.69	976.174	998.814
50a169a1-0f06-4d57-8363-bac1e9bf645d-exon	-0.09334	0.821848	0.882648	24.087	25.0502	17.0651	22.7578	20.3582	20.0059
51119250-c9a5-4f40-84b5-19d48041e3d5-exon	-0.361395	0.129626	0.225517	759.128	897.952	1224.42	607.274	899.831	732.068
5125f8b1-78f8-4f23-afef-4edd68fae5b6-exon	0.439722	0.185872	0.298807	62.9369	31.7944	49.7731	74.2623	52.9312	69.6502
513d71b3-4026-4ab5-84e3-db44594b430f-exon	0.320322	0.0730515	0.142017	282.051	290.004	268.775	331.785	370.519	348.251
51583acc-3c57-4359-bef9-2943d9cf813f-exon	0.59416	0.0205178	0.0494905	289.044	309.273	511.952	656.383	499.793	514.226
519b3a93-a0d9-4180-a7e1-bbb070cd5df3-exon	2.07062	8.56881e-08	7.63647e-07	16.317	9.63468	18.4872	55.0979	75.3252	54.0901
51a19432-f920-4ec5-bc0b-9e052be7ac9c-exon	0.912222	1.03234e-06	7.56322e-06	408.701	508.711	477.822	776.161	971.084	875.073
51d146af-641a-46e3-839b-0e08533dacec-exon	-0.852775	0.00778174	0.0217491	292.929	163.79	127.988	131.756	91.6117	102.993
51d9042f-1afb-4bea-81e5-3a8149f540a0-exon	-0.754086	0.101402	0.18556	29.526	18.3059	22.7534	17.9667	11.197	13.3373
51de3dfc-7f6f-47ba-9a69-b87942297e64-exon	-0.592907	0.0376685	0.0825664	133.644	137.776	115.189	55.0979	110.952	89.6561
51e567af-6668-42a7-ad9e-34300e295a7d-exon	0.1134	0.716974	0.807258	47.3969	55.8812	34.1301	47.9112	51.9133	50.3853
51ec420a-c882-4051-8ac3-d381647359c7-exon	0.242532	0.164794	0.272285	303.03	312.164	319.97	350.949	370.519	383.076
5237fd62-3a70-4cbb-8dd4-bbe7d30aa45a-exon	-0.323669	0.159821	0.266076	225.33	249.538	199.092	220.391	145.561	174.866
53a33da5-fc33-4d8f-9030-2d311c323177-exon	0.799332	0.068979	0.135591	25.641	14.452	14.2209	37.1312	21.3761	37.7889
54750638-5c55-4941-ae0b-5a5e46e06d09-exon	-0.255908	0.477538	0.609818	45.0659	37.5753	25.5976	31.1423	31.5552	29.6384
54f3defc-5935-42ba-8c25-5403f34d48d9-exon	-1.5665	3.36161e-08	3.17741e-07	741.257	1743.88	1298.37	395.267	459.077	422.347
55950eb6-5e24-4c7d-bb41-b99a590ec7e7-exon	0.339456	0.330232	0.465078	33.4109	39.5022	75.3707	65.8779	57.0029	60.7587
55e06e37-6f0d-4184-8983-05ef295a82b7-exon	1.35808	0.00734033	0.0206779	13.986	4.81734	18.4872	43.1201	27.4835	23.7107
55eb6de2-bad3-4ca7-999a-cc1e6579a1ca-exon	-0.500781	0.331091	0.465989	11.655	18.3059	18.4872	10.78	10.1791	12.5963
5652c306-83cb-4234-a57e-d65c698b9319-exon	-0.783055	0.000986557	0.00364024	169.386	200.401	170.651	97.0201	128.256	89.6561
567d314e-d6cb-464f-9235-49b19d923716-exon	0.271886	0.604647	0.720828	13.209	7.70775	17.0651	14.3734	18.3223	12.5963
56a752b7-3f88-4788-b959-54af1191ffc0-exon	5.0908	7.39241e-06	4.57405e-05	1.554	0	0	27.5489	18.3223	20.7469
56f4ec9b-6cb0-4a43-af58-c79727d47015-exon	0.563276	0.325228	0.459908	13.986	3.85387	14.2209	13.1756	17.3044	16.3011
56f4efb0-5298-4e16-b876-76c272b18673-exon	0.478311	0.175848	0.286619	45.8429	57.8081	27.0197	44.3178	64.1282	74.8369
5763ef14-285c-49c3-9905-de57eae66045-exon	-1.1193	0.000147836	0.000681147	89.3549	105.981	78.2149	43.1201	50.8954	33.3432
57ea2773-e3f3-4e5e-90ea-af2a8709478a-exon	0.00729085	0.987362	0.991717	22.533	12.5251	21.3313	16.7689	16.2865	22.9697
57f9babb-b58e-4af3-9cb9-a247b6be8133-exon	-0.169757	0.442704	0.578157	243.978	207.146	191.982	214.403	157.776	201.541
5800e283-179e-4e05-bc72-bbc2579b7b29-exon	-0.539877	0.222973	0.34442	22.533	28.904	18.4872	15.5711	13.2328	19.265
58638b83-ed32-401d-bdd7-02641cd560b9-exon	0.891492	0.00961035	0.026082	44.2889	38.5387	98.1241	112.591	105.862	110.403
58e7232f-8ecb-4559-8a80-ea732f34166f-exon	0.979674	0.000221897	0.00097786	175.602	162.826	301.483	486.298	383.751	384.558
58fd4217-c60a-4da5-b0ac-7e0db5ec2050-exon	-0.0376254	0.916913	0.947997	187.257	162.826	484.932	301.84	243.28	264.523
592796e6-b79f-45bd-a805-86026a2b7554-exon	1.17539	0.00768415	0.0215239	11.655	28.904	15.643	47.9112	50.8954	28.8974
59a1b105-84a4-441b-ae1f-ed3fc49c6c95-exon	-0.345503	0.669279	0.770644	825.95	921.076	4643.12	2007.48	1312.08	1708.65
5a5e5dcb-b274-490f-ae0b-d8798e84cedd-exon	1.1303	0.0299835	0.0681974	11.655	6.74428	8.53253	16.7689	24.4298	18.524
5a626938-6288-4894-9f5e-7014080f53e2-exon	-0.285219	0.123389	0.216755	523.697	665.757	583.056	439.585	510.99	502.371
5a800fc7-26b9-4153-a0f9-e988d45b5e5f-exon	-0.133777	0.598455	0.715244	222.999	200.401	127.988	155.711	161.847	187.463
5a89ede7-b6d8-4bfa-8540-30ec40de7083-exon	-0.0358511	0.875449	0.919421	572.648	789.08	501.997	694.712	509.972	615.737
5acd553b-d5a8-486d-9dc1-4b343247225c-exon	-0.363373	0.0155218	0.0390663	1322.45	1268.89	1321.12	1013.32	1024.02	1004
5b7d3a31-2500-4f35-88bb-201094f5ddff-exon	-3.81875	8.28026e-23	3.83739e-21	149.184	187.876	368.321	15.5711	15.2686	18.524
5b7d86a8-df30-42af-b98f-ae86a99003ce-exon	-0.695086	8.4613e-05	0.000411939	3077.69	4173.74	3457.1	2165.59	2223.11	2225.1
5b8891e0-e46a-4da5-af77-f9899fbf62e2-exon	0.0428146	0.890087	0.930503	43.5119	78.0409	55.4615	64.6801	59.0387	58.5358
5c8e8a9c-a452-4161-ba41-db8e318d0554-exon	-0.471413	0.306313	0.439548	25.641	52.9907	17.0651	26.3511	25.4477	18.524
5ce71fe7-e3b4-49b8-be85-8b4698327123-exon	3.61052	1.87573e-07	1.5662e-06	0.776999	0.963468	8.53253	43.1201	37.6626	24.4517
5d9076fa-4c7a-4d79-b7d2-fd2ec0c43dce-exon	3.98714	2.84559e-38	3.3747e-36	79.2539	62.6254	160.696	1775.11	1674.46	1283.34
5dde58b0-8b22-4938-a1a0-845a07a3b7c7-exon	-0.264192	0.410544	0.547953	63.7139	68.4062	39.8185	53.9001	51.9133	40.0118
5edf760c-182c-44a6-80f2-a3c781d2c417-exon	-0.918617	0.000862018	0.00322938	209.79	325.652	430.893	156.909	191.367	160.788
5f283e36-6481-4f95-9a47-9ae437f5ee7f-exon	0.778661	0.088985	0.166902	13.209	13.4886	12.7988	26.3511	24.4298	17.783
5f28f724-7434-49cf-9e52-3b892566c68d-exon	3.95318	4.51534e-34	4.12909e-32	21.756	14.452	38.3964	461.145	357.286	297.866
5f569a6d-313b-4c85-b11b-52f111d3454e-exon	1.05517	3.95522e-09	4.33608e-08	305.361	337.214	280.152	592.901	651.461	675.014
5f6e39ce-f649-43bd-8a1f-d9f5cb94444e-exon	-0.382847	0.504314	0.634924	12.432	23.1232	7.11044	13.1756	9.16117	11.1144
5f7179a3-6561-40e9-a61a-cf01a5b33970-exon	0.11771	0.725048	0.813389	41.9579	73.2236	52.6173	68.2734	42.7521	70.3912
5fd59d75-8d07-4cfd-a4ad-d169e948e510-exon	-0.34857	0.26384	0.391697	91.6859	74.187	139.365	64.6801	101.791	71.1321
5fef64ee-f22a-4ca6-9fae-1275ac9afd56-exon	0.205356	0.656844	0.761461	30.303	47.2099	9.95462	39.5267	29.5193	34.0841
603fba7b-dabd-46ae-9163-171ecd7bca45-exon	-0.0835403	0.741091	0.824279	403.262	527.017	268.775	370.114	406.145	358.624
60b642f3-5759-40bd-a9b1-eaee7da5989b-exon	-0.614435	0.0154013	0.0388488	317.016	410.437	605.81	275.489	305.372	286.751
60c2a583-ccb4-40fb-89cb-773e84f17406-exon	-1.45849	3.67416e-05	0.00019465	109.557	195.584	95.28	44.3178	34.6089	65.9454
60ff536b-a779-44ba-99d1-8c350e33ad59-exon	1.20664	0.00236039	0.00780966	13.986	18.3059	14.2209	38.3289	34.6089	34.8251
6103a555-dfb1-49c7-bc08-35382b608c49-exon	-1.10943	0.0468773	0.0989338	20.202	15.4155	14.2209	8.38446	5.08954	9.63248
6161252b-bb0d-43bb-8c7f-39ac2bd3ec0a-exon	0.486723	0.0970836	0.1793	48.1739	45.283	45.5068	79.0534	57.0029	60.0177
6280a942-2390-44e5-85f3-57560a65b890-exon	0.97029	0.00221844	0.00739427	27.195	30.831	34.1301	67.0756	60.0566	52.6081
628b314f-42f2-45f8-8719-61fdb75752e0-exon	-1.27251	3.09994e-05	0.000167304	107.226	101.164	69.6824	32.34	36.6447	45.9395
62c3866b-4c68-4f35-b975-33c6fef0630f-exon	-0.8765	5.71268e-08	5.23663e-07	1330.22	1268.89	1420.67	767.777	677.927	743.183
62ed763e-041d-48d8-8a30-ed5f27ecc307-exon	0.465422	0.0861009	0.162389	306.915	261.1	536.128	507.858	545.599	465.323
62ff00c8-8436-4eec-be0e-873b56ceacea-exon	0.138912	0.646507	0.753492	142.968	78.0409	91.0137	141.338	88.558	116.331
6310051b-bf02-4d61-b6d7-029b1d6f788e-exon	-0.389934	0.0362115	0.0798582	264.957	289.04	285.84	223.985	205.617	211.174
63126e19-8a9c-4d51-8362-2028c8c44537-exon	0.378282	0.0822185	0.156387	191.142	140.666	155.008	229.974	199.51	205.987
633764ac-ea13-4994-8666-fded4f464984-exon	0.683475	0.239283	0.363522	9.32399	5.78081	9.95462	10.78	17.3044	11.8554
634b69c2-4544-4dfa-b3d8-b01fb1da5efe-exon	1.76363	6.02684e-13	1.08398e-11	70.7069	65.5158	95.28	228.776	304.355	244.517
63789ee7-9190-4c4c-9d2d-69040483eda2-exon	0.336072	0.0601336	0.121344	369.074	365.154	422.36	445.574	515.062	495.702
64117e75-f1f9-468a-8d36-9d800f18f6fe-exon	0.150448	0.677181	0.777188	46.6199	54.9177	24.1755	37.1312	52.9312	51.1262
6431691a-6400-4b9f-882f-f8940b76a71d-exon	-0.692545	0.0849182	0.16065	36.5189	50.1003	32.708	33.5378	14.2507	26.6745
656a0c0c-6cfb-4433-b179-0e0ae8f5c115-exon	0.35577	0.268705	0.397506	34.9649	65.5158	44.0848	65.8779	59.0387	60.0177
6616d583-c8e5-43ef-bab0-761adcc764e9-exon	-1.27207	9.36562e-07	6.90817e-06	315.462	315.054	534.705	172.48	141.489	166.716
665fb835-aee4-45ab-9699-91af76fd5b1b-exon	0.192851	0.734328	0.81988	10.101	8.67121	17.0651	10.78	9.16117	19.265
66aa8d83-0d54-40a1-be5a-776a87d871b1-exon	0.938799	3.55306e-07	2.83573e-06	250.971	227.378	285.84	469.53	489.614	500.889
66ca9cd3-3c16-4936-99af-77d892537ac7-exon	1.6713	3.37384e-10	4.27979e-09	64.4909	128.141	103.812	337.774	299.265	302.312
66d758de-2a9b-4a1f-b2e7-dd2de994e62c-exon	-0.447772	0.33234	0.467209	24.087	17.3424	19.9092	14.3734	19.3403	11.8554
66ee72af-7390-4345-a4ee-599811ef8b12-exon	1.45837	6.29143e-08	5.7188e-07	65.2679	74.187	125.144	250.336	238.191	227.475
670fdc46-5e6f-4252-a403-5dfdf4544707-exon	0.227653	0.412236	0.549503	55.1669	52.0273	51.1952	67.0756	60.0566	59.2768
6723facf-a32e-465d-9bb0-31e64bcf8f22-exon	0.13005	0.616376	0.729773	80.0309	124.287	92.4358	118.58	102.809	103.734
67a48175-945a-4a27-b34b-66f851d398fd-exon	-0.997828	0.000192429	0.000861844	92.4629	121.397	113.767	62.2845	54.967	47.4214
67fba8c4-ddd9-43bc-b30d-f06655179559-exon	0.0306131	0.953507	0.971035	14.763	19.2694	7.11044	16.7689	13.2328	13.3373
680291d4-8c69-4b67-bbdc-f227aa57325a-exon	-1.13413	1.23746e-09	1.4592e-08	783.992	811.24	1008.26	367.718	393.93	421.606
685c9968-5837-4bfe-a481-02eac2c0f4d6-exon	-0.13896	0.430737	0.567028	1169.38	991.409	1318.28	1052.85	1045.39	1058.83
68768df0-5017-49cd-a2cc-80e3cad6a3ff-exon	0.588491	0.00137624	0.00486221	243.978	259.173	295.795	390.476	417.342	389.745
6889f31a-948e-4c5e-872e-97228e1f30b5-exon	4.31542	1.34947e-26	7.91947e-25	7.76999	2.8904	14.2209	173.678	150.65	139.3
68c19f17-e4f1-4d0a-898d-73b3880c4ccb-exon	-0.240394	0.289458	0.421039	233.1	171.497	172.073	149.722	180.17	160.047
69289e00-3299-4ccd-a5fb-5c4d6d55ed2f-exon	-1.34304	0.0268293	0.0619891	15.54	20.2328	12.7988	2.39556	8.14327	8.15056
69a027ec-69e9-4d5a-81a1-489bde88b785-exon	0.0104593	0.952068	0.970214	599.066	684.062	699.668	614.461	656.551	722.436
6a723e23-fff0-4bfa-a1a0-5bcbd71f5c33-exon	0.0143878	0.955005	0.97156	97.9018	115.616	136.521	104.207	103.827	141.523
6ab2220e-e52f-4841-a790-d0b4af35f9ff-exon	-0.519497	0.00139272	0.00491128	1106.45	1261.18	1267.08	886.357	805.165	843.212
6b6d88c9-1d74-44b3-911c-a9c48d26790a-exon	0.333965	0.131789	0.228339	272.727	417.182	338.457	492.287	388.841	414.937
6b71ac1a-0920-4825-8a39-429b8bcc52a2-exon	1.00991	2.39126e-05	0.000132222	122.766	125.251	193.404	269.5	320.641	290.456
6b886c83-61f6-4339-8901-0162f82509c6-exon	-1.76385	2.12649e-16	5.59123e-15	2451.43	3835.57	2736.1	824.072	982.281	850.622
6bb8a4c6-b368-4b8e-8810-a069ab01dc91-exon	0.122014	0.70706	0.799703	77.6999	45.283	48.351	53.9001	57.0029	76.3188
6d06c33c-095d-41b6-bd1b-a848db009185-exon	0.131511	0.727484	0.814887	31.08	25.0502	27.0197	35.9334	33.591	22.9697
6d1ea0df-2e38-490b-b015-3592a5d92e49-exon	-1.43992	0.000313029	0.00132435	57.4979	78.0409	34.1301	26.3511	21.3761	16.3011
6d475d8e-1f18-4f22-b715-f6d9babd2d6d-exon	-0.934925	0.0684369	0.134709	18.648	34.6849	27.0197	4.79112	18.3223	17.783
6d77b93d-a364-4e28-8b81-4294480b0a21-exon	0.226964	0.422412	0.559303	66.0449	53.9542	92.4358	76.6579	83.4685	85.2104
6d816523-7f69-4916-8c3a-8c1fe8c214fa-exon	0.799567	0.00134655	0.00477286	94.0169	90.566	72.5265	164.096	165.919	122.258
6e1a1623-b771-4e11-b610-ed66c8059772-exon	-0.0877457	0.706304	0.798974	105.672	105.018	118.033	91.0312	105.862	110.403
6e968899-4e9b-4846-885e-ce27b2f477e6-exon	5.82252	6.53534e-06	4.09043e-05	0	0.963468	0	28.7467	15.2686	18.524
6ea0a3cf-2d2b-447d-ae71-53ddb67ec556-exon	0.287229	0.158432	0.264189	174.825	157.045	170.651	184.458	222.922	205.246
6f3c9bb9-9594-405b-a170-d63a9bd6c519-exon	-0.768733	0.0228607	0.0542453	101.787	65.5158	52.6173	38.3289	38.6805	52.6081
6f8b3525-b268-4a53-9002-2b75d19d353f-exon	-0.61615	0.00120891	0.00433905	310.8	359.374	307.171	213.205	200.528	223.77
6fa3ec55-d9b9-43ce-8655-64765378cbaf-exon	-0.912385	6.40428e-07	4.86571e-06	954.932	1269.85	1069.41	561.759	570.029	617.219
6fb29cec-d9fb-4bf6-944e-c69c36a6799f-exon	1.44642	5.09618e-07	3.94962e-06	470.861	273.625	662.693	1467.28	1179.76	1180.35
6fd1af09-9c76-4ac4-95f1-0e33aa3cb67c-exon	-1.3886	4.59245e-08	4.26295e-07	306.138	459.574	571.68	179.667	160.83	168.939
6fdd6d1e-6a39-4fe5-b263-fa5adb231ff5-exon	0.529935	0.0184883	0.0453379	99.4558	96.3468	108.079	132.954	142.507	160.788
7002477e-e676-48b6-873b-c6e9153f7bd3-exon	-0.22127	0.638683	0.747395	41.1809	24.0867	12.7988	29.9445	19.3403	20.0059
70a980fa-a608-4968-a52e-d9b8ec4aeb4a-exon	0.214614	0.307309	0.440672	219.891	254.356	321.392	292.258	315.552	310.462
70c1562f-e3a7-4a35-9b79-2d2490ca8707-exon	1.78184	8.08871e-08	7.23409e-07	958.817	422.963	1339.61	2758.49	3557.59	3032.75
70cae88f-9d7c-4e32-927c-3f3723cb65ca-exon	1.39634	1.51893e-09	1.76911e-08	464.645	611.802	814.857	1781.1	1727.39	1458.95
718ead63-3c2d-49c6-b407-f23cfbafcf7f-exon	-0.571678	0.120494	0.212652	55.1669	81.8948	56.8836	64.6801	25.4477	41.4937
720185e3-493f-41c6-bc2f-cbceb7865512-exon	-0.875837	0.0327372	0.0735569	31.857	87.6756	61.1498	41.9223	32.5731	24.4517
72dd5295-95ac-4e0b-b0df-455d6c57168e-exon	0.833113	0.000188584	0.00084612	111.888	118.507	160.696	234.765	220.886	234.884
7369d802-12b9-428f-90df-51fd6c83b9b1-exon	-0.586677	0.0781297	0.149897	336.44	408.511	912.981	416.827	328.784	355.661
73767da0-68cb-4829-a927-dd111dbecfd4-exon	1.28456	0.000272282	0.00117023	32.6339	15.4155	27.0197	63.4823	61.0745	59.2768
73f92a45-51d8-467f-805c-91c41f008b62-exon	0.0682151	0.755737	0.835306	1380.73	2232.36	1769.08	1839.79	2132.52	1670.12
74033447-29ba-4003-b9fd-a9396394b951-exon	1.78904	0.00221191	0.00737679	5.43899	3.85387	12.7988	26.3511	14.2507	31.1203
74bc9ab4-8682-4643-9146-93ef1b44d8f5-exon	0.768039	0.225567	0.347437	7.76999	9.63468	4.26627	8.38446	10.1791	18.524
752d3bf8-6b70-4d04-b0f1-9804b5bf8077-exon	0.808239	0.0138372	0.0355171	42.7349	32.7579	25.5976	58.6912	51.9133	68.9092
755306a5-4cde-446a-b3c7-635ebdb0e7be-exon	-0.413214	0.316888	0.450915	32.6339	21.1963	29.8639	27.5489	18.3223	17.783
759c9bed-d329-47c2-842e-b082b8e95f3b-exon	-0.809088	0.132399	0.229135	24.087	26.0136	108.079	33.5378	35.6268	20.0059
75ca9c6c-146d-41c7-9cf3-1be8d569c935-exon	-0.0769901	0.814601	0.878099	54.3899	47.2099	38.3964	34.7356	55.985	42.9757
75dc4547-2af7-49b8-a74c-e391f7ca5d97-exon	-0.0343961	0.852042	0.90418	344.21	342.995	311.437	295.852	356.268	323.799
7659654b-f483-4193-a433-14210f4a575b-exon	-0.320586	0.520476	0.648885	15.54	22.1598	21.3313	21.56	18.3223	8.15056
76df158e-6630-47c7-b7b2-1ea8efaa1571-exon	-0.315239	0.413916	0.551192	27.195	45.283	35.5522	38.3289	21.3761	27.4155
775acaa7-f17e-4d9a-ba11-ae354f65fd44-exon	1.78076	5.17228e-05	0.000265254	10.101	11.5616	12.7988	28.7467	50.8954	37.048
7791240b-4f3d-4ab4-bb99-635df418d0c7-exon	-0.27348	0.335327	0.470566	73.0379	78.0409	58.3056	55.0979	50.8954	67.4273
77be7c29-f247-42d8-93e2-94446ccab1f9-exon	1.87836	0.000692237	0.00266751	3.88499	6.74428	9.95462	17.9667	24.4298	28.8974
77d1bdc7-0ba1-432f-9038-1e85e158c4ae-exon	-0.146255	0.676644	0.776729	38.0729	31.7944	55.4615	33.5378	33.591	43.7166
7874718e-1c4b-441d-a946-91f38c5c5cef-exon	0.409069	0.142623	0.243152	49.7279	53.9542	52.6173	59.889	69.2178	77.0598
78872637-41ac-41ff-89b0-5df83c9b7eb9-exon	-0.0931233	0.593435	0.710823	775.445	753.432	792.104	822.874	707.446	647.599
7907fbc6-7f06-4b37-a3d5-f7a9606bcb26-exon	0.838474	1.22489e-07	1.05487e-06	1881.11	1980.89	2003.72	3539.44	3161.62	3784.82
790c30c4-7476-466b-b97c-f5572bbd6cb1-exon	1.11872	0.00557785	0.0163953	19.425	20.2328	9.95462	40.7245	35.6268	34.8251
7926d5f2-8160-4b15-bc7c-6d6e693a0263-exon	-0.695488	0.000109292	0.000520079	2215.22	2721.8	2053.5	1357.08	1422.02	1537.49
793f62db-c36d-421b-8a96-78c15da23022-exon	-4.31732	3.71856e-34	3.45599e-32	9595.16	2953.99	4183.79	312.62	254.477	272.673
7941aca1-0005-45b6-aca3-e2e070025559-exon	-0.100437	0.740821	0.824137	54.3899	77.0775	75.3707	46.7134	67.1819	76.3188
7a4fe094-0fbb-4d7b-b9fb-9da13d9b88ff-exon	1.21098	0.00958816	0.0260404	13.986	12.5251	14.2209	22.7578	47.8417	23.7107
7a62fbea-84a7-41ac-925a-c13c741f4d9f-exon	0.142296	0.449229	0.583922	337.217	363.228	297.217	373.707	394.948	335.655
7a7f4774-9416-48e5-8750-10d493075add-exon	-0.431076	0.273639	0.402972	42.7349	43.3561	22.7534	35.9334	22.394	24.4517
7ace798e-049c-4b30-9888-ea05d6a0c3ea-exon	-0.0452688	0.911236	0.944246	17.871	27.9406	27.0197	25.1534	23.4119	21.4878
7b176dd0-5fd2-4ee2-a4d5-c6eed559dd93-exon	0.46066	0.0338763	0.0756424	232.323	276.515	284.418	409.641	393.93	288.233
7b4aea54-9cd1-4d6a-8bcd-3de94d956d9f-exon	-0.155326	0.50627	0.636612	235.431	352.629	392.497	295.852	308.426	273.414
7b504a27-2b71-40bb-9960-eeed410d9164-exon	0.182431	0.373237	0.509784	163.17	199.438	197.67	196.436	212.743	223.77
7b75a565-806b-4f17-ba6e-8d0d5cd3fabf-exon	-0.663955	0.00589142	0.0171698	216.006	143.557	189.138	114.987	126.221	105.957
7bc37eaf-d2da-41b4-afda-2bbc0d413888-exon	-0.825854	0.00448276	0.0135429	94.0169	112.726	91.0137	62.2845	38.6805	66.6864
7bf5f157-1e84-4561-bb62-c6fdde5e454c-exon	1.30408	6.67192e-05	0.000333743	23.31	43.3561	32.708	93.4268	82.4506	68.9092
7c0d3057-1fb6-4d6f-9a75-730bfe755f15-exon	0.424734	0.446389	0.581381	19.425	8.67121	18.4872	32.34	8.14327	22.2288
7c1441fa-2ddf-4802-8be3-9f63db5d9fb3-exon	0.939406	0.152181	0.255977	6.21599	11.5616	2.84418	20.3622	8.14327	12.5963
7c52ed68-0675-4590-89ce-640dd2abf527-exon	-0.969641	0.017538	0.0433061	25.641	59.735	46.9289	23.9556	23.4119	20.0059
7ca5ff03-d82b-47be-886a-689f2c4b91d4-exon	0.457777	0.0640782	0.12763	131.313	139.703	93.8579	141.338	168.973	192.65
7cd0abcc-655c-4a84-b160-bffccde1b335-exon	2.05306	1.37685e-15	3.34232e-14	38.0729	50.1003	54.0394	190.447	218.85	174.126
7cf5ad40-01f5-4a48-a08b-8d42241ca3bd-exon	0.0846163	0.771488	0.847409	82.3619	79.9679	55.4615	68.2734	97.7192	67.4273
7d3ab9e5-118e-449f-848b-830bfc58c605-exon	1.30947	0.0051583	0.0153162	9.32399	13.4886	9.95462	21.56	33.591	25.9336
7f5e045b-6825-4239-a219-e487b8ac00ca-exon	0.378735	0.0408652	0.0883881	358.196	425.853	446.536	582.121	512.008	503.853
7fe9583c-d202-4e3c-a3a7-96052470b15e-exon	0.00872368	0.976716	0.985081	48.1739	45.283	58.3056	45.5156	57.0029	48.9033
80944bde-dd79-4469-81d4-b3be7ac568a1-exon	-0.845785	0.000232219	0.00101724	187.257	179.205	164.962	80.2512	111.97	102.993
8139e34e-10a4-4b1e-806c-e34c808e710b	0.893516	1.14785e-06	8.33167e-06	505.826	525.09	588.745	1103.15	1045.39	858.772
815e8550-afa5-42c8-bd0e-f2fa67963d0b-exon	0.322103	0.341369	0.47684	43.5119	90.566	44.0848	68.2734	73.2894	81.5056
816804ef-d5a4-47d2-8ee7-99480624aa18-exon	-0.255663	0.55745	0.680437	44.2889	17.3424	27.0197	20.3622	28.5014	25.9336
817c198d-dc14-4757-9c28-2901e300dc19-exon	-0.00107958	0.998541	0.998936	13.209	8.67121	12.7988	11.9778	17.3044	5.92768
81eb88db-c109-4fe4-8a6d-e63fa54e8adb-exon	0.197264	0.741845	0.824815	10.101	18.3059	4.26627	11.9778	16.2865	10.3734
82477e2b-a13e-4463-ba99-1e2afa208893-exon	0.275098	0.181596	0.293382	205.128	216.78	197.67	209.611	280.943	258.595
829a181f-52a3-4e93-8df6-7f9dd108d9fd-exon	-0.449164	0.0191614	0.0466936	1148.4	917.222	826.234	656.383	719.661	743.924
82aca3c4-3df3-41a7-bbfa-17b93c31fd23-exon	0.138801	0.671971	0.772806	48.9509	52.9907	42.6627	34.7356	63.1103	60.7587
82b9eb4b-25f3-460a-a6fa-6484dab8f97e-exon	-0.872318	0.0183931	0.0451367	42.7349	52.0273	41.2406	15.5711	26.4656	31.1203
82e12078-14a3-4183-b59e-7918340f752e-exon	-1.17936	2.15196e-12	3.64043e-11	1921.52	2110.96	1821.7	780.952	865.222	937.314
83c60a88-c36a-403b-94de-1a7b246c64e0-exon	0.10628	0.74938	0.830565	79.2539	37.5753	65.4161	57.4934	61.0745	77.0598
8460fe5a-31b7-47db-807a-2f9d834191c1-exon	-0.544379	0.0484215	0.101609	128.205	136.812	182.027	95.8223	132.328	77.8008
84acf397-92b1-45ef-a03f-0f32c1e600e0-exon	0.0492536	0.808245	0.873581	4469.3	6076.59	4104.15	5017.5	4575.5	5566.83
84ccaf05-6317-4b38-9ec9-daddd0d83eb5-exon	0.114976	0.645616	0.75292	146.076	190.767	176.339	240.754	156.758	159.306
84d764a5-a121-4b5c-b9fb-dbcd75071163-exon	0.437393	0.37435	0.511089	8.54699	14.452	18.4872	16.7689	18.3223	19.265
8508513f-e87e-4f09-8b97-12f88f58b30e-exon	-0.347236	0.278407	0.408778	57.4979	59.735	55.4615	49.109	30.5372	55.572
85558716-ac79-4199-816a-04f3043a4433-exon	0.0366866	0.882964	0.925223	135.198	118.507	95.28	123.371	100.773	135.596
856d9978-469c-4d2c-8f24-1069c6aad546-exon	-0.301902	0.0680157	0.13403	857.03	918.185	770.772	704.294	673.855	689.092
8584cd16-a90c-4bf4-88c0-3074990c4196-exon	1.50588	0.00286572	0.00924649	6.99299	9.63468	9.95462	28.7467	28.5014	17.783
85e21e31-2e63-4de7-a25a-88057d5d3fe1-exon	-1.59158	0.00121654	0.00436368	34.9649	52.0273	136.521	19.1645	18.3223	34.8251
85ec338c-2ee5-4594-b70a-252b7c164681-exon	0.434007	0.242896	0.36793	21.756	24.0867	25.5976	27.5489	34.6089	33.3432
86458f2f-4f43-4881-b8a6-d5648eff2901-exon	0.198415	0.2718	0.400886	1256.41	1041.51	994.04	1385.83	1150.24	1245.55
865fe1ff-e93e-4abe-b5c9-f683947973e2-exon	-0.50132	0.139165	0.238326	50.5049	48.1734	42.6627	25.1534	31.5552	42.2347
8668b03e-614c-4546-a324-16612b3b219c-exon	-0.0185377	0.95282	0.970682	55.9439	70.3332	118.033	75.4601	83.4685	78.5417
86820c60-1e4a-4c16-a1e0-293218f7b3d9-exon	0.317197	0.451312	0.586083	17.871	39.5022	19.9092	37.1312	25.4477	34.0841
86c17086-5c91-4bf1-8472-aeb5492857e8-exon	-0.385055	0.114663	0.204439	111.888	140.666	106.657	82.6468	100.773	91.879
879c2ab5-70e2-4a0c-bdc2-9697c508ac40-exon	0.535757	0.280833	0.41165	15.54	15.4155	8.53253	15.5711	16.2865	25.9336
87ae449c-787a-489a-b03a-092d3b0ae9c9-exon	0.60359	0.0488992	0.102498	184.149	134.886	177.761	380.894	181.188	194.872
87c82dfa-11e4-44af-a094-b94766df09d3-exon	-0.979675	3.81996e-05	0.000201671	378.398	352.629	408.14	142.536	249.388	184.499
88b26894-9581-49b3-bba8-bcffc7c28e0c-exon	-0.955368	0.00114324	0.00413792	149.961	102.128	83.9032	63.4823	57.0029	54.831
8906b4fc-f118-441e-8c6b-f6d2b0da6a5a-exon	-0.0215776	0.961178	0.975357	23.31	14.452	21.3313	17.9667	23.4119	17.0421
8911efa7-343f-4a40-9ebf-4e71604df594-exon	0.876581	0.0200478	0.04848	28.749	22.1598	18.4872	55.0979	33.591	41.4937
89bbc451-b091-4c27-a438-c83eb400d5a1-exon	0.00222388	0.995689	0.997178	28.749	24.0867	17.0651	28.7467	22.394	20.7469
8a192653-4f4b-4d82-b951-889689ffad6e-exon	1.01698	0.0020393	0.00688025	66.0449	27.9406	55.4615	87.4379	105.862	108.921
8a40668e-32ba-4bb3-bc15-790e91c0c731-exon	0.935873	0.0817055	0.155646	13.209	8.67121	5.68836	14.3734	18.3223	21.4878
8ab0e461-a973-4782-bd6a-db9482f0c9a9-exon	0.377262	0.117979	0.209107	5065.26	3158.25	2756.01	4389.86	4899.19	4977.03
8b4f6fcc-073d-4f4c-bd65-9219f7c29937-exon	-0.429642	0.256263	0.383133	27.195	28.904	38.3964	23.9556	22.394	22.9697
8b574d19-b1f2-407b-af04-fa18d6bd5d56-exon	-0.601217	0.0048368	0.0144742	457.652	587.716	405.295	280.28	351.178	325.281
8b794ec1-716a-49e2-a7c6-c7a8abef9c86-exon	-1.3499	1.58469e-06	1.11713e-05	90.9089	105.981	83.9032	37.1312	34.6089	38.5299
8b950fee-059c-4412-bab3-0900d37679a5-exon	0.490259	0.141792	0.24197	45.0659	64.5524	28.4418	58.6912	66.164	71.1321
8bc63380-eba3-4a7e-b8f7-2f0f77fb0df6-exon	-0.173475	0.258204	0.385056	1254.08	1257.33	1321.12	1072.01	1165.5	1158.86
8bccf1c4-24f0-4998-ab17-67f45699a1df-exon	0.555749	0.0274821	0.06326	178.71	129.105	105.235	226.38	180.17	205.987
8c2c0239-c844-4299-8adb-0651ae35beb0-exon	0.322359	0.14598	0.247914	2869.46	4785.55	4210.81	4936.05	5466.17	4432.42
8c9b8507-d799-4395-870a-a0173caa922f-exon	-0.562606	0.234403	0.35814	20.979	17.3424	19.9092	13.1756	16.2865	10.3734
8cbd7722-62ab-4e8c-85f0-62ee35b80a77-exon	0.109283	0.607801	0.723074	293.706	256.283	301.483	370.114	256.513	292.679
8cbfcd06-77a8-44c0-af21-60cfdb107727-exon	-0.515553	0.0192505	0.0468517	216.006	203.292	290.106	162.898	167.955	163.011
8cc058a8-4c97-41da-9fe1-b0864529637d-exon	-0.617058	0.268657	0.397461	16.317	17.3424	11.3767	7.18668	15.2686	7.4096
8d000bd0-efc0-4611-8acb-cefab83b40f2-exon	0.391384	0.15951	0.265684	57.4979	60.6985	93.8579	93.4268	89.5759	91.138
8d1de72d-02f4-4c64-a184-99233737358a-exon	-0.0845384	0.733487	0.819424	149.961	173.424	103.812	134.151	140.471	131.15
8d2e2b66-f776-41a8-87d3-5e6323e4fc04-exon	0.196155	0.561577	0.684352	51.2819	63.5889	31.286	45.5156	68.1999	55.572
8d36861b-6a23-4b2f-9bb1-5ff3748184c1-exon	0.631001	0.006977	0.0197964	133.644	111.762	160.696	231.171	176.098	218.583
8d5a53dd-28df-4eb1-9030-3c4f05767b82-exon	0.438011	0.0212678	0.0510938	410.255	421.999	504.842	643.208	523.205	640.93
8d8f6557-fcfb-45d2-9668-58fd186959bc-exon	0.409777	0.0552923	0.113118	125.097	118.507	119.455	173.678	162.865	147.451
8daa8dd7-aab3-4185-8451-96b09f6a2ccb-exon	-1.11787	6.86386e-07	5.18891e-06	760.682	803.532	998.306	347.356	500.811	331.95
8dcd5a83-7172-4fdf-bde8-a680830159db-exon	-0.227521	0.42342	0.560279	186.48	241.831	130.832	167.689	119.095	191.909
8e219541-83e8-4f6e-8290-be6b13436b0f-exon	-0.98716	0.00943152	0.0256793	36.5189	56.8446	38.3964	28.7467	19.3403	19.265
8e497b21-0e74-4f71-ba16-49f970068b9d-exon	-3.4231	0.00247398	0.00813347	55.1669	32.7579	432.315	10.78	12.2149	25.1926
8e694e0a-006b-44ba-af2b-d4afc8ad698d-exon	-0.421485	0.246571	0.372161	39.6269	47.2099	29.8639	31.1423	34.6089	22.9697
8f003166-2336-4c7a-ab12-ec5936796971-exon	0.051433	0.907453	0.941825	23.31	23.1232	12.7988	17.9667	25.4477	19.265
8f7550fc-4709-4903-bd07-0161aade95d8-exon	0.255891	0.479677	0.612028	41.1809	26.9771	35.5522	28.7467	43.7701	50.3853
8faa8584-8efc-420e-b83f-2193c60b4af4-exon	-1.0148	2.37554e-06	1.62046e-05	595.958	922.039	765.084	356.938	415.307	357.143
8ff23698-2777-41ec-a65f-7c7d3b4f34c2-exon	0.550619	0.15158	0.255211	273.504	434.524	113.767	416.827	286.032	503.853
90673833-d443-4ae6-a834-1912b538a3f2-exon	-1.88414	0.00292534	0.00940818	7.76999	70.3332	48.351	8.38446	11.197	14.0782
91267c55-5ad2-48b3-b137-89a2ecec3b14-exon	0.62453	0.00140023	0.00493547	361.304	263.027	342.723	497.078	486.56	506.816
918d166f-d813-4301-a7b6-a31f5fdacae0-exon	1.2197	0.00877353	0.0240923	6.99299	18.3059	17.0651	26.3511	30.5372	38.5299
9208dd6a-736b-4206-9ca3-c257b89e6adc-exon	-1.17544	9.13177e-10	1.08921e-08	3333.32	4526.37	4572.02	2020.65	1695.84	1787.19
920edfc9-eec3-4aeb-b7b2-98bf6804b2f1-exon	2.99385	6.96145e-06	4.3333e-05	3.108	2.8904	2.84418	16.7689	28.5014	25.1926
92449a92-82bc-49fa-96e7-d53d810a3a4f-exon	-0.202683	0.361538	0.497926	162.393	169.57	127.988	131.756	140.471	129.668
92a0879a-e468-4666-af32-d415a2b91b77-exon	-1.95723	4.51781e-15	1.02871e-13	937.061	709.113	1355.25	250.336	257.531	263.782
92b36827-4ea8-4428-a49e-cc139ae2f6ba-exon	0.122571	0.729418	0.816352	33.4109	37.5753	24.1755	33.5378	39.6984	31.8613
92e8dfea-d85f-41f3-90d7-aadbc7bbd300-exon	0.357705	0.147935	0.250306	806.525	746.688	1349.56	1366.67	1202.15	1145.52
930a586b-6950-45a8-94cf-68756e395573-exon	-1.86064	1.17391e-19	4.22275e-18	11903.6	8345.56	9441.25	3198.07	2385.98	2593.36
938b5cde-db56-4826-b3ec-aaf2bf91365e-exon	0.335127	0.0908146	0.169663	222.222	204.255	190.56	250.336	289.086	241.553
939996a3-84c8-454a-8fe8-bcfa518d21a2-exon	-0.526749	0.00339999	0.010699	2785.54	3382.74	3233.83	2467.43	2155.93	1904.27
93d8975a-a901-4001-95ad-42e0319a032e-exon	0.676448	0.0290269	0.0663091	101.01	80.9313	76.7928	196.436	90.5938	129.668
93f7a900-90a5-4d0c-b15a-8e6e1b6f0a0f-exon	-0.626856	0.00158779	0.00550971	567.209	463.428	456.491	346.158	275.853	342.323
9444b31d-9919-4fa8-a172-f1bbd9ff2448-exon	-0.0845134	0.705027	0.797847	560.216	738.017	940.001	747.414	641.282	717.99
94642523-4749-4417-896a-28a5fb21837b-exon	-0.11384	0.58495	0.704203	153.846	155.118	173.495	143.734	158.794	142.264
9491d7b2-a406-4a36-90b6-37fbd3f97bf7-exon	0.156895	0.550252	0.674522	232.323	237.977	429.471	341.367	335.91	320.836
9612447a-8ddf-4436-a7e1-e6b56e74933a-exon	-0.553376	0.0140666	0.0360369	138.306	174.388	167.806	107.8	101.791	116.331
96229847-043a-49d1-95ca-1bf4a39f1efa-exon	0.755738	0.000151971	0.000698361	351.203	327.579	246.021	511.452	542.545	514.226
96d9f769-0716-485f-9e00-61767481c4fc-exon	0.224767	0.62227	0.734226	20.979	11.5616	19.9092	19.1645	24.4298	17.783
96fe75fb-de9c-4076-9937-83d06c9ea6cc-exon	-0.165867	0.521608	0.649763	118.104	85.7487	100.968	106.602	78.3789	88.1742
974b7916-c1a0-42e3-a029-23fc7419554b-exon	-0.964892	3.61408e-05	0.000192003	362.081	242.794	248.866	154.514	142.507	142.264
976c201b-7566-4e05-800e-86477b1ccadd-exon	-0.907512	0.000609572	0.00238733	91.6859	101.164	93.8579	57.4934	43.7701	51.8672
977ecab7-3f91-4240-a64f-64b56ba72a02-exon	-0.481791	0.0673936	0.133023	101.787	110.799	95.28	58.6912	90.5938	71.1321
97d23f88-ee71-414e-8072-cbb54472cab5-exon	-1.46393	0.00442628	0.0134131	21.756	48.1734	58.3056	7.18668	12.2149	25.1926
97f138b5-04e4-4285-b89c-c7b8b80389eb-exon	-0.443908	0.202762	0.318979	34.9649	41.4291	41.2406	22.7578	31.5552	31.1203
98030943-8e2d-4931-98ed-c3cccfb5792a-exon	0.0708374	0.813687	0.877505	69.9299	52.0273	54.0394	75.4601	48.8596	62.2406
989fd3dd-89a8-4caf-a1c7-26db2d1c1a42-exon	-0.716091	0.255731	0.382563	6.99299	31.7944	19.9092	17.9667	5.08954	12.5963
98d116e1-5187-4135-bf36-b6c5f2312db8-exon	0.541534	0.298992	0.431599	8.54699	17.3424	8.53253	17.9667	16.2865	16.3011
99133eb1-9331-40b1-998e-2a11d19730c5-exon	0.104466	0.844096	0.898501	14.763	10.5981	9.95462	10.78	14.2507	13.3373
99a8078d-5d0f-4c55-842a-65f33d3e402e-exon	0.139131	0.686258	0.784285	76.9229	51.0638	35.5522	76.6579	53.9491	53.3491
99b57228-fad5-41d3-bd3d-15b563e62fda-exon	0.575065	0.0113812	0.0301413	104.895	102.128	122.3	160.502	184.241	144.487
99d0b4f9-1592-4657-85f9-fc23c9139354-exon	-0.656723	0.0206878	0.0498636	94.7939	76.114	76.7928	62.2845	53.9491	42.9757
99f9389d-e4b2-4b03-9e36-b3402f4b7ead-exon	0.514974	0.0369733	0.0812628	80.0309	72.2601	68.2603	114.987	107.898	94.8428
9a1b24c4-dd17-4872-96cf-19739ebf835b-exon	-0.94184	4.6788e-05	0.000242514	303.03	438.378	354.1	170.085	229.029	171.162
9a34375c-0609-4ebe-8d7a-d05bf4a6bbf9-exon	-3.1336	0.0574681	0.116658	3.108	1.92694	110.923	3.59334	2.03582	7.4096
9a6fc1f4-25b5-4424-ab99-e7b93ecf7271-exon	1.73656	0.00353941	0.0110765	6.21599	3.85387	5.68836	15.5711	18.3223	18.524
9aab9dbd-cf5c-49f4-a13c-44c93ae55939-exon	0.87152	0.000933888	0.00346838	86.2469	105.018	65.4161	144.931	189.331	139.3
9ad63e82-b8d8-4847-9935-bab73fe148b8-exon	0.0352366	0.902198	0.938296	72.2609	56.8446	49.7731	63.4823	65.1461	57.0539
9b199d71-9aaa-41b6-a61c-967f77c1c29c-exon	0.581499	0.0191264	0.0466476	200.466	139.703	261.664	303.038	304.355	288.974
9b2f4f10-52bf-4cdd-bf98-4e4aa60e2dd8-exon	0.0178305	0.947758	0.967568	138.306	118.507	73.9486	112.591	110.952	114.849
9b4fe128-5e6a-4783-a490-0846c60c9f6c-exon	-0.587192	0.0145837	0.0371527	150.738	213.89	197.67	125.767	105.862	140.782
9b5783d4-9605-4a76-b2aa-76fcb554fcb7-exon	3.62213	2.06301e-30	1.53512e-28	17.871	18.3059	28.4418	303.038	280.943	191.909
9cd2f65a-3ff5-4710-a934-dd183bd72837-exon	0.77334	0.190133	0.303892	5.43899	14.452	5.68836	14.3734	13.2328	16.3011
9d0991f0-67e1-4790-92ab-a9bb4189b6a8-exon	0.34286	0.250509	0.376661	46.6199	47.2099	39.8185	47.9112	61.0745	60.7587
9d3fba0e-7822-4b31-9b2d-626fee799e3c-exon	-2.06891	7.17647e-07	5.4055e-06	44.2889	73.2236	76.7928	15.5711	22.394	8.89152
9da32082-1640-4e4e-8c7e-57d755844d46-exon	-0.0663982	0.770249	0.846457	237.762	204.255	180.605	185.656	239.208	172.644
9e5d8362-5321-4078-93df-8f780f36c5a5-exon	-0.35687	0.262187	0.38984	49.7279	58.7716	52.6173	38.3289	33.591	52.6081
9e6c8c24-28c3-4950-b57a-b8d957060243-exon	0.138457	0.615254	0.729121	59.8289	59.735	79.637	81.449	72.2715	64.4635
9e6eef47-9ffa-4b7c-bff2-cc936bad2582-exon	0.0108202	0.981455	0.987963	18.648	12.5251	21.3313	15.5711	21.3761	15.5602
9e948a4f-a3ad-4df8-a1d5-c99a41277733-exon	0.212792	0.526189	0.653575	161.616	281.333	287.262	268.303	411.235	165.975
9ec848f5-98b8-4bd1-b84d-292ea89a9691-exon	-0.860568	0.000813301	0.00306705	114.996	102.128	136.521	67.0756	55.985	70.3912
9edd6c55-e35d-4108-93e1-adcb784eb488-exon	-0.275487	0.27495	0.404537	136.752	113.689	147.897	93.4268	136.4	98.5476
9eddb30f-67e0-4058-ba35-4d4142bad524-exon	-0.789584	0.00346656	0.0108874	86.2469	83.8217	89.5916	50.3067	42.7521	56.3129
9eefeb27-80ea-47b0-a7c4-75c038d8cf2d-exon	-0.445802	0.265622	0.393738	83.9159	29.8675	59.7277	51.5045	30.5372	45.9395
9f268aa5-f869-45c2-850a-09bcaf5faa6b-exon	1.59179	0.000479286	0.00193156	8.54699	14.452	12.7988	23.9556	44.788	37.048
9fa667da-1135-40f5-8640-39a2f316290a-exon	-0.3817	0.0440766	0.0939442	1728.82	2335.45	2342.18	1650.54	1504.47	1759.04
9fa9381b-33f9-4856-b581-73a4e566a117	0.376597	0.21654	0.336345	41.1809	39.5022	36.9743	56.2956	47.8417	49.6443
9fab2fb7-a9f1-4249-a1d2-f9bc6b4a4821-exon	-0.0872375	0.795941	0.865224	85.4699	136.812	58.3056	113.789	81.4327	71.8731
9fc10877-dbc9-470d-961a-fab23c247601-exon	-0.655516	0.00197058	0.00667712	892.772	1326.7	1314.01	831.259	695.231	715.767
9fdbc55f-aa04-4fe0-a248-1fa69a5fc0b1-exon	-0.678123	0.275382	0.404964	21.756	17.3424	5.68836	14.3734	5.08954	9.63248
a0215aed-c299-49e3-8c6a-91bb2e1da51b-exon	0.749043	3.19052e-05	0.000171826	218.337	212.926	219.002	377.3	369.501	346.769
a056637a-07d5-41f1-a872-a2464eb0cbee-exon	-0.998182	0.00350717	0.0109982	44.2889	66.4793	68.2603	22.7578	33.591	31.8613
a174aea2-4498-47db-b6bd-e485c785a34b-exon	1.69134	1.29686e-05	7.63295e-05	34.9649	11.5616	34.1301	107.8	77.361	74.8369
a17dca90-888c-4a57-be88-f55ba55629a7-exon	0.703361	0.046841	0.0988674	28.749	40.4657	21.3313	52.7023	40.7163	55.572
a1915c78-f032-4da7-b87c-b741c253d076-exon	0.54491	0.177992	0.289057	24.087	24.0867	15.643	40.7245	30.5372	24.4517
a1a9d97a-974d-4e2f-9a0f-f26f71d648d9-exon	0.161738	0.393287	0.529828	509.711	509.675	604.388	697.108	574.1	544.605
a1b59e57-a49a-4490-9c1e-0acadda2113b-exon	-0.298379	0.099713	0.183309	2231.54	2832.6	2205.66	1787.09	2114.2	2010.22
a1d7fff0-0e7b-419d-a8da-a3cf3faa7291-exon	-0.168848	0.386121	0.522771	444.443	463.428	509.108	480.31	428.539	352.697
a1e5f7a6-7e15-423f-a671-06a221c68755-exon	-1.68206	3.098e-05	0.000167239	40.4039	48.1734	45.5068	20.3622	11.197	11.1144
a2e3b4aa-2775-484a-88a2-b90d78e0129a-exon	0.833535	0.00445779	0.0134853	45.0659	40.4657	32.708	68.2734	68.1999	76.3188
a330404c-5ef2-4cc0-8d8c-17b511459ab8-exon	-0.0396562	0.792728	0.862995	1610.72	1566.6	1544.39	1599.04	1454.59	1541.2
a3575b08-ef86-450d-97b7-2f8726921453-exon	0.10694	0.727309	0.814887	44.2889	62.6254	44.0848	53.9001	47.8417	60.7587
a39d6c81-3b71-49c6-bd5f-3dffebad1b07-exon	-0.515877	0.142811	0.243399	39.6269	36.6118	51.1952	37.1312	24.4298	27.4155
a4e949c5-9076-4e83-8442-c73f2fc260e0-exon	0.324527	0.39765	0.534266	45.0659	38.5387	18.4872	55.0979	38.6805	37.7889
a56674ab-7fbf-4caa-93e8-30a22b83b209-exon	-0.142658	0.581556	0.701639	87.0239	84.7852	75.3707	63.4823	76.3431	83.7284
a566d515-2a7c-4da8-bfa0-de5bea70c2fc-exon	0.542739	0.0163864	0.0408987	1572.65	1255.4	1780.46	2823.17	1813.91	2075.43
a650152c-ee25-4fd5-861d-40a46de69038-exon	0.473161	0.0387003	0.0843905	94.7939	89.6025	91.0137	134.151	115.024	133.373
a666ce29-408d-4c4f-b4a1-33188150641b-exon	0.0150375	0.930477	0.956551	609.167	612.766	570.258	540.198	656.551	614.256
a6868eeb-e78c-4de2-a533-1c8322ff5a48-exon	-0.751139	0.0584619	0.118358	29.526	44.3195	31.286	25.1534	15.2686	22.2288
a6e56540-4510-4a70-8645-8b5e2deb6a22-exon	-0.897258	3.02882e-06	2.02723e-05	386.168	376.716	415.25	198.831	240.226	193.39
a6febf44-3a56-4092-815a-e7c976666267-exon	0.202283	0.361299	0.497718	213.675	196.548	189.138	186.854	277.889	225.252
a75b8a51-726e-40da-841c-89aaf941e9ff-exon	1.26846	0.0155439	0.0391055	6.99299	8.67121	15.643	20.3622	34.6089	17.783
a7f6fc0b-3c0b-4fe2-b47f-04b7bc9a3b95-exon	-0.631658	0.0313996	0.0709718	61.3829	77.0775	59.7277	40.7245	46.8238	40.7528
a89657dd-a8aa-468f-b162-e3b8275b1e9f-exon	0.525561	0.00315841	0.0100373	3365.18	2608.11	2733.26	3781.39	4330.18	4423.53
a8b5e443-07a2-44b3-a116-c11c27af1014-exon	0.454536	0.175836	0.286619	66.8219	43.3561	31.286	74.2623	55.985	67.4273
a8de54de-ca52-4389-b3ea-fe3038059371-exon	-0.810457	0.00270549	0.00878444	127.428	132.959	83.9032	67.0756	64.1282	66.6864
a911c8fa-1cd7-45e4-8e82-f28d1c3c1ebd-exon	-0.88217	0.00469549	0.0141013	62.9369	71.2966	49.7731	34.7356	32.5731	33.3432
aa1e3496-b3a8-4ba9-ac60-05e710e33464-exon	0.0419903	0.877966	0.921541	97.9018	87.6756	68.2603	99.4157	69.2178	94.8428
aa25927e-aafc-418e-a03d-9cf8b19a7d50-exon	0.760843	0.00665377	0.0190117	113.442	79.0044	65.4161	168.887	155.74	118.554
aa8f0273-fdac-4b51-b221-76f030e6b4c2-exon	0.173687	0.485575	0.61727	84.6929	81.8948	108.079	94.6246	97.7192	114.108
aac93f39-3081-4e50-be50-63354b6cafd4-exon	0.0610985	0.892592	0.932052	34.9649	18.3059	17.0651	33.5378	17.3044	24.4517
ab6cf07b-0fef-4065-921a-9f7af782ed47-exon	0.624737	0.109195	0.196746	20.202	17.3424	24.1755	28.7467	36.6447	28.8974
aba9c203-cb58-4701-ab61-db51ff988ed6-exon	-0.0752443	0.836883	0.893089	59.8289	36.6118	38.3964	55.0979	28.5014	45.9395
abcaab0b-85d4-4a18-ad4f-ffc3a9d19b2d-exon	-0.354802	0.550322	0.674571	17.871	10.5981	19.9092	5.9889	8.14327	22.2288
abd26293-d41c-440d-b2d1-9adfd4d48218-exon	0.117828	0.673447	0.773917	88.5779	63.5889	116.611	88.6357	100.773	99.2886
abe4b702-20ca-4a82-8fc9-c69a2d29d0d8-exon	-0.959874	0.000319969	0.00135045	156.954	190.767	118.033	68.2734	78.3789	92.62
ac87b0bb-77aa-4344-be38-dc2debefac11-exon	0.875511	0.0116014	0.0306116	31.857	19.2694	32.708	51.5045	55.985	45.9395
acc81313-fde7-464b-8f7a-b891082b0f87-exon	0.201267	0.625808	0.736454	31.857	15.4155	29.8639	22.7578	32.5731	32.6022
ad5aaf3a-af7d-4ebc-a5f8-cdb1fa2b9c8b-exon	-1.13524	0.000431024	0.00175823	55.1669	65.5158	66.8382	34.7356	23.4119	27.4155
ad889d8b-f126-43e9-bf98-f32c9492017f-exon	-0.604169	0.225916	0.347856	23.31	21.1963	22.7534	13.1756	7.12536	22.9697
ae186153-e2f1-4360-8b15-eda157dd84f7-exon	-0.287794	0.524676	0.652239	30.303	17.3424	24.1755	25.1534	22.394	12.5963
aecf4ba0-ecaf-4a86-bd93-9df14185bdd8-exon	-0.862688	1.58105e-06	1.11491e-05	2083.13	2706.38	2680.64	1470.87	1330.41	1306.31
aedefa07-e769-45a8-ade8-91117bc410d6-exon	-0.552219	0.00324456	0.010278	961.925	1329.59	1070.83	785.743	729.84	777.267
af02d842-3f9a-4dbb-9a80-9868af05a214-exon	1.57577	0.000931258	0.00346031	15.54	19.2694	4.26627	28.7467	52.9312	39.2709
af0a8eae-700f-4866-afaf-d56418a1afea-exon	-0.0134797	0.973564	0.983163	21.756	45.283	58.3056	28.7467	48.8596	43.7166
af16cace-c488-4368-8eb1-58a4d8e96e39-exon	-0.143639	0.726607	0.814375	24.864	22.1598	44.0848	20.3622	32.5731	27.4155
af21366d-3d92-4045-b24d-7081cb84fabb-exon	-0.114165	0.819115	0.881217	11.655	23.1232	18.4872	19.1645	10.1791	19.265
af312912-7f02-45fc-b581-58dd07cc3b4a-exon	-0.353329	0.284405	0.415495	127.428	132.959	295.795	152.118	121.131	158.565
afbbe8cf-c4a4-40e1-83a9-96f4c3facaae-exon	-0.0216107	0.972365	0.982642	13.209	4.81734	11.3767	7.18668	11.197	10.3734
afef0184-36d4-4582-9dfa-cb0ed0540112-exon	-1.81129	5.33346e-05	0.00027266	55.9439	43.3561	34.1301	14.3734	18.3223	6.66864
b03c4a0e-6ffb-462b-9de3-a45d65e0e2ca-exon	-0.129843	0.842236	0.8971	3.88499	12.5251	32.708	10.78	17.3044	14.8192
b0c5c130-69dc-4dfc-a5e9-ebc2cec51e16-exon	0.775451	0.0920456	0.171596	14.763	27.9406	12.7988	46.7134	23.4119	26.6745
b15662af-c77c-4668-b588-8fe680391f1f-exon	-0.709187	0.00672299	0.0191785	94.0169	134.886	115.189	79.0534	64.1282	67.4273
b17b0dd0-8c6e-4278-8f45-f7a0fec15a4d-exon	-0.388148	0.068165	0.134266	198.135	188.84	177.761	128.162	139.453	163.011
b1922782-05df-45a9-a99b-e9090c807e99-exon	-1.78407	0.00314254	0.0099938	20.202	15.4155	15.643	4.79112	4.07163	5.92768
b1b36ed9-7b74-40c0-9d8b-a916e12e098b-exon	4.02738	7.82357e-26	4.35557e-24	6.21599	8.67121	14.2209	174.876	146.579	126.704
b1c81c40-0234-46ee-91ba-95abb2e2e51d-exon	-0.440179	0.304898	0.43796	38.8499	51.0638	18.4872	34.7356	19.3403	27.4155
b1d1a1d7-20cd-44e1-8758-88ef6e03165f-exon	-0.10883	0.667336	0.769244	114.996	91.5295	88.1695	80.2512	103.827	90.3971
b1d711c7-2364-4c61-979a-61d1a4dd45a4-exon	1.21053	0.000315313	0.00133229	29.526	39.5022	19.9092	57.4934	75.3252	75.5779
b23beb9e-01d5-429a-b649-8e144bebb702-exon	-0.109997	0.556513	0.679752	609.167	601.204	490.621	572.539	470.274	536.455
b2a6c784-0cf7-4164-813a-475c5e06558c-exon	-2.34957	0.0159752	0.0399864	3473.96	2795.98	21797.8	1502.02	1752.84	2251.78
b2d0865e-f5d0-4e51-a494-49bfa7fe0412-exon	0.117382	0.850945	0.903311	11.655	14.452	2.84418	11.9778	11.197	9.63248
b2d83f37-c6b0-4349-8143-ed158ee02c3e-exon	0.714973	0.0359271	0.0793385	31.857	26.0136	24.1755	51.5045	43.7701	41.4937
b2e66134-30ff-4c8d-b19f-394a96465984-exon	0.644087	0.00376234	0.0116858	135.198	139.703	149.319	177.271	249.388	233.402
b33c6a3d-cd8e-42ed-9622-fc98394042e5-exon	0.715631	0.000524635	0.00209138	125.097	123.324	135.098	228.776	200.528	200.059
b3b115b9-de5f-470c-8cf6-9dfb33550d50-exon	-0.134754	0.663231	0.766004	85.4699	59.735	52.6173	51.5045	55.985	73.355
b3ebca7f-15b6-45f7-95b8-f8a47e2ee2d2-exon	0.567958	0.00722746	0.020418	8842.25	5807.79	6015.44	9184.57	10465.1	10989.2
b493b494-1ef9-4149-8de5-f102be121d8e-exon	0.266325	0.417364	0.554586	89.3549	77.0775	54.0394	59.889	124.185	82.9875
b4c9c48b-e647-4a1c-8224-454aa7d26e30-exon	-0.823829	0.000160152	0.000732359	246.309	218.707	275.885	160.502	137.418	121.517
b4fa6a9b-8ed3-4214-91fa-a5cf7728cfa5-exon	3.37974	1.2299e-27	7.75759e-26	62.1599	28.904	32.708	415.629	543.563	354.179
b50f8206-268d-4f90-a185-8c8a6dc77c0b-exon	1.46425	0.00583638	0.0170443	6.21599	10.5981	5.68836	20.3622	22.394	20.0059
b53e2fda-02c6-4fc4-827c-40e82120c90a-exon	0.536103	0.126509	0.22116	146.076	195.584	72.5265	201.227	137.418	264.523
b58bf4c1-920c-49ed-ad72-e4a0dfdbb79b-exon	1.50776	0.00433531	0.0131813	6.99299	8.67121	7.11044	20.3622	17.3044	26.6745
b630f5ee-920d-4663-a74e-a5dc4b61af56-exon	1.36232	3.4767e-11	5.00091e-10	614.606	637.816	711.044	2100.9	1518.72	1427.09
b638cc9b-6a3f-45a4-9a10-8183cf3ddbf3-exon	-0.802176	0.0646927	0.128628	20.979	26.9771	28.4418	13.1756	15.2686	14.8192
b6405bed-d977-48d6-9362-7bf0f97fa3f9-exon	1.04946	0.00784341	0.0218785	18.648	25.0502	21.3313	62.2845	30.5372	42.2347
b673f43a-bbcb-4e15-92e7-cf4b4c855ecc-exon	-0.200859	0.430686	0.567027	303.03	215.817	210.469	155.711	238.191	240.812
b692757d-d91c-475e-b915-267b08b68a6a-exon	-1.61561	3.65238e-05	0.000193743	49.7279	68.4062	115.189	33.5378	19.3403	22.9697
b6c421f7-2fca-4bfa-97ad-569287e96a14-exon	-0.852005	0.000268083	0.00115458	171.717	216.78	152.164	103.009	96.7013	100.771
b6d45e91-b0ec-4ce3-ac64-9d32ef9043c5-exon	-0.712665	0.000386654	0.0015992	1167.05	1044.4	911.559	573.736	763.431	570.539
b6d9cc8e-0677-4a6f-95f8-3ce0f245458d-exon	1.30033	0.000605378	0.00237295	13.986	23.1232	24.1755	61.0867	44.788	42.9757
b6dc25e6-b725-40fd-862f-eb77cab243de-exon	-0.199833	0.319569	0.45368	208.236	237.977	241.755	185.656	220.886	191.168
b747a321-ae44-497a-9a9d-947c6f9fea39-exon	1.21871	1.56243e-07	1.32058e-06	73.0379	71.2966	66.8382	176.074	146.579	170.421
b7517130-9bb1-45e6-bd0d-4d7d6222ee55-exon	-2.42937	0.000345332	0.0014473	1957.26	1055	5203.42	481.507	435.665	607.587
b7a362b4-0c19-4060-bc03-05db247235a8-exon	-1.72916	1.10401e-09	1.30929e-08	157.731	275.552	282.996	82.6468	68.1999	65.2045
b7c9ba42-1e44-472e-a437-dc827ed868a2-exon	0.196971	0.689552	0.786706	17.094	16.379	11.3767	15.5711	24.4298	12.5963
b8a8e09a-ce6d-4de4-8e54-878c099ebce7-exon	-0.727963	0.0161984	0.0404915	73.8149	81.8948	71.1044	52.7023	31.5552	52.6081
b8b89602-19e9-46bb-8359-a6397233e87c-exon	0.177223	0.708262	0.800553	27.195	17.3424	12.7988	17.9667	31.5552	17.0421
b8d96d3b-405f-46ac-b6ba-ee2238656aad-exon	-0.059315	0.891602	0.931461	23.31	23.1232	35.5522	39.5267	22.394	17.0421
b9d0b5aa-5ec7-43c8-b8e0-a308210ec19d-exon	3.84385	3.9156e-34	3.62432e-32	21.756	22.1598	31.286	452.761	362.375	246.74
ba1efbc2-3d25-4adc-92bf-523308eed17b-exon	0.139797	0.458955	0.592897	343.433	437.415	345.568	425.212	410.217	406.787
bb8d952a-234f-4ba7-b95c-6ca50030737a-exon	-1.56225	0.00478531	0.0143418	21.756	23.1232	14.2209	8.38446	7.12536	5.18672
bbbb995c-34c2-4f61-ba8b-ed1b5b8cbc45-exon	0.356125	0.33643	0.471735	27.195	20.2328	34.1301	33.5378	38.6805	31.1203
bc2195ad-a636-48de-b467-9396c6bcc1ea-exon	0.00609039	0.985883	0.990931	39.6269	29.8675	34.1301	35.9334	38.6805	30.3793
bc901653-914c-4e29-9198-d5e21aec45a8-exon	1.9431	0.00561014	0.0164681	2.331	6.74428	2.84418	9.58223	21.3761	14.8192
bca82235-8dc2-4a35-8c4e-7611a98d3fa6-exon	0.52173	0.126369	0.220966	26.418	43.3561	28.4418	50.3067	46.8238	44.4576
bcba501a-391c-49ed-8971-b0178e57e63e-exon	0.484426	0.0474078	0.099822	339.548	211.963	199.092	348.554	370.519	336.396
bce63213-27b2-4425-9924-0a5902f31ce1-exon	0.583705	0.0436401	0.0931289	66.8219	114.653	61.1498	118.58	131.31	115.59
bceb6b18-0e51-4322-89da-133efe05e9f4-exon	0.213316	0.672542	0.773312	8.54699	23.1232	18.4872	23.9556	14.2507	19.265
bcfc5422-6c30-461c-8e37-65966ae7abdf-exon	-3.45101	7.51998e-21	2.98831e-19	224.553	268.808	565.991	38.3289	23.4119	34.8251
bd32cbe9-6ce4-4b50-9ca4-46c58d73e8f0-exon	0.124504	0.576335	0.697182	134.421	155.118	191.982	182.062	166.937	172.644
bd64ebbd-602d-42dd-8c81-4a085c6310a2-exon	-0.335807	0.623356	0.73486	3.88499	16.379	27.0197	9.58223	20.3582	6.66864
bdb5dad5-34b4-4f67-9c4b-65d254a773a0-exon	0.974594	0.000159972	0.00073173	86.2469	122.36	79.637	173.678	226.994	168.198
be96f7c4-149a-42fc-9781-27060c7f79df-exon	0.327299	0.230061	0.352878	80.8079	137.776	83.9032	123.371	123.167	133.373
be97bf3f-4a31-4906-94ba-30a7064bc9f6-exon	-1.34396	0.00668267	0.0190754	22.533	31.7944	18.4872	7.18668	10.1791	11.1144
bf045b34-f399-4009-a3a2-95a1373cf5f9-exon	-0.115553	0.712656	0.803922	40.4039	45.283	44.0848	39.5267	36.6447	42.9757
bf3064dd-e19b-4a7b-b675-bafd32b965ef-exon	0.442893	0.0626424	0.125395	107.226	102.128	109.501	124.569	175.08	133.373
c011980e-03a7-4d89-b702-793598c93f9e-exon	0.633834	0.183654	0.295931	13.986	12.5251	9.95462	17.9667	19.3403	20.0059
c03e31a1-8d3f-4596-8968-155956ab409e-exon	-0.150588	0.484052	0.615953	320.124	228.342	233.223	227.578	243.28	235.625
c06986bf-26bb-4771-9c68-1ed86deec38d-exon	0.0711075	0.792328	0.862924	105.672	105.981	68.2603	86.2401	114.006	96.3248
c06c7fd4-3ca2-4780-be80-7cedf65eafa2-exon	-0.631314	0.0043622	0.0132543	1926.18	2880.77	1746.33	1422.96	1333.46	1475.25
c079faf9-4374-4073-b14c-0fc77e799155-exon	0.294818	0.352048	0.488093	55.9439	47.2099	49.7731	43.1201	80.4148	63.7225
c0cad19d-7469-48ef-8dc5-9688db248106-exon	-1.34839	3.44176e-06	2.27552e-05	216.006	285.187	472.134	123.371	130.292	126.704
c13c837b-599c-406f-8853-f3db8a3e18ca-exon	0.613286	0.00570119	0.0166923	313.131	248.575	219.002	465.936	391.895	343.064
c15534ea-0695-4303-9008-ffa9deec2f5b-exon	1.15646	7.41806e-06	4.58743e-05	73.0379	47.2099	65.4161	143.734	135.382	135.596
c16b6acf-b0ad-4dcb-a7b9-20b8d700c9f2-exon	0.175495	0.512699	0.642213	86.2469	80.9313	56.8836	83.8446	80.4148	91.138
c1aef268-a60a-4c6d-a586-bd6f9c6a4659-exon	0.353609	0.151348	0.254953	75.3689	77.0775	73.9486	95.8223	106.88	87.4332
c1e4a492-97fa-43f1-8b5d-917ca16ed2f0-exon	-0.669425	0.166107	0.273978	16.317	26.9771	28.4418	20.3622	16.2865	8.89152
c202af0c-6d9a-474f-8e81-2b9125cf3fe9-exon	-0.367551	0.289196	0.420766	59.8289	50.1003	42.6627	40.7245	26.4656	51.1262
c2538513-bf41-476e-8d9f-0fbe8e5df356-exon	-0.835799	4.40941e-06	2.85072e-05	3115.77	4117.86	3203.97	1914.05	1836.31	2096.92
c29a4790-f4ea-4391-9b73-428a0beffec3-exon	-1.0302	0.063115	0.126071	16.317	30.831	14.2209	4.79112	12.2149	12.5963
c2c46623-9073-4fd1-ab4f-87281c50a4f8-exon	-0.135641	0.730519	0.81715	47.3969	37.5753	105.235	58.6912	43.7701	67.4273
c323dc0b-9fe1-47eb-a73e-bd7d238bb2fb-exon	4.80897	2.74548e-05	0.000149879	0	1.92694	0	14.3734	20.3582	20.7469
c39dee44-e44a-4c72-bbc0-cd99f7d5cbd7-exon	-2.6692	0.0011516	0.00416485	3590.51	2057	13505.6	904.323	920.189	1186.28
c3ecb14c-a6e6-4e33-8b33-0e7e5d668c28-exon	-0.439648	0.121559	0.214251	74.5919	56.8446	69.6824	50.3067	50.8954	47.4214
c42e3e1f-dd95-45f0-94d5-83fed06e2ec0-exon	-1.19972	0.0498184	0.104088	18.648	27.9406	9.95462	3.59334	7.12536	13.3373
c55f305d-8dd8-49ba-af56-adb2457eceee-exon	-0.0723746	0.709426	0.801438	205.905	222.561	231.801	216.798	193.403	216.36
c5990486-5b03-4aba-bbbc-abc9cf842481-exon	-0.606993	0.00127876	0.0045553	484.07	621.437	565.991	352.147	398.002	346.769
c5cc3ead-b879-488b-ac13-c65f5524c1d6-exon	-1.0808	0.0878375	0.165171	10.101	18.3059	12.7988	7.18668	3.05372	8.89152
c5da6a3b-d9bc-4a75-8b74-daac86b30ba4-exon	0.636695	0.0165382	0.0412052	53.6129	50.1003	52.6173	75.4601	83.4685	83.7284
c5dae363-dddd-44aa-b3fd-b2c823f67ec4-exon	3.80465	5.98626e-34	5.43057e-32	25.641	24.0867	55.4615	561.759	483.506	375.667
c5f726e0-75cf-466b-9e5b-dfdf35e3ce3a-exon	0.69103	0.264516	0.39243	5.43899	14.452	4.26627	11.9778	14.2507	13.3373
c63bb49b-240c-4bbf-9d48-57caf21793b8-exon	-4.46096	0.0119145	0.0313345	12.432	5.78081	143.631	1.19778	0	5.92768
c647a366-9f71-41a8-9ff3-ef017d120a60-exon	0.130094	0.635852	0.744963	94.0169	157.045	145.053	174.876	140.471	117.813
c774096c-bc35-4f1a-8769-93930c41f508-exon	-0.888539	0.0107424	0.0286624	53.6129	111.762	71.1044	34.7356	51.9133	40.7528
c80d8976-efa6-4474-a6ff-5194838d7ce8-exon	0.152031	0.764456	0.841755	14.763	17.3424	8.53253	16.7689	12.2149	17.0421
c8388ef9-d471-4d43-98c9-89f7487f2520-exon	-1.82535	1.60624e-17	4.81239e-16	1360.52	976.957	1006.84	367.718	274.835	303.053
c8b3f189-1038-4e71-b122-8e5c9b7c27cb	0.00890341	0.976838	0.985145	128.205	99.2372	65.4161	74.2623	118.077	104.475
c9acbdd2-70ba-48c7-8e41-7470fde2d5b0-exon	0.298539	0.430335	0.566696	44.2889	25.0502	25.5976	29.9445	45.8059	42.2347
c9de0cd6-26f2-4969-95c3-4fff42e73f06-exon	-1.59827	0.000387586	0.00160198	27.972	95.3833	59.7277	21.56	20.3582	18.524
ca4f95c2-fcc1-4822-b7eb-3645b9d62e23-exon	-0.438586	0.00682273	0.019424	2563.32	3028.18	2602.42	1909.26	2003.24	2132.48
ca5fa640-704c-4d76-8895-7061b7eada0d-exon	-0.127101	0.581815	0.701689	285.936	277.479	267.353	201.227	327.766	231.92
ca6066f1-a714-441a-9105-dccff32c5655-exon	-0.527181	0.0959721	0.177671	253.302	597.35	275.885	238.358	294.175	249.703
cad9c1bd-aafa-438e-a729-131aae45c7d8-exon	-0.303959	0.105818	0.192052	268.065	280.369	308.593	244.347	219.868	228.957
cb0b3864-c389-43be-9b69-096a3dc01deb-exon	-1.05981	0.000977389	0.00360992	55.1669	72.2601	54.0394	27.5489	31.5552	28.1565
cb3b5450-36a2-4d1d-8f4c-fcae946a11de-exon	-0.128837	0.545248	0.670264	201.243	156.082	177.761	153.316	164.901	171.162
cb5ec463-d48e-4e78-baf0-8c73ad0935a4-exon	1.25235	0.00347601	0.010914	14.763	17.3424	11.3767	23.9556	41.7342	38.5299
cb66fa6c-2b0b-4613-81cd-d80277f2afa9-exon	-3.14826	1.25112e-06	9.02089e-06	33.4109	44.3195	18.4872	5.9889	5.08954	0.74096
cbccc338-c96d-4fa5-90a6-10cdac89f4db-exon	-1.36263	7.97463e-10	9.59738e-09	797.201	1175.43	787.837	373.707	314.534	385.299
cbd5f586-4548-4c8d-a70f-9238b8dade05-exon	0.962592	2.50208e-06	1.70016e-05	126.651	115.616	129.41	253.929	248.37	222.288
cc005f8d-13a3-4d5e-8889-85da764c831b-exon	0.44329	0.109552	0.197216	63.7139	57.8081	59.7277	71.8668	101.791	73.355
cc094670-5061-44f3-8d8b-cd11ed837e3f-exon	0.596357	0.010449	0.0280075	112.665	83.8217	119.455	160.502	154.722	160.788
cc365fe3-3290-41ea-82d9-327608af5e7e-exon	-1.18277	5.30357e-05	0.000271254	105.672	79.9679	81.0591	32.34	42.7521	42.2347
cc373410-569f-4d1a-a06d-3df38dc1653d-exon	0.709469	0.0410272	0.0886833	23.31	34.6849	49.7731	64.6801	52.9312	54.831
cc4efebc-b53e-4158-84df-1bd6d3c4f531-exon	-0.652568	0.015958	0.0399521	128.205	201.365	118.033	88.6357	98.7371	97.8067
cc8b5604-6a4c-4569-b189-35672f6b9e16-exon	0.0721012	0.872845	0.917745	16.317	18.3059	35.5522	16.7689	28.5014	25.9336
ccb736e7-e6ee-49a3-93de-00812d449a55-exon	0.361527	0.188843	0.302388	58.2749	53.9542	54.0394	65.8779	82.4506	65.9454
cd6b7431-857d-46ea-b610-2530a80dfcca-exon	0.23878	0.674601	0.775047	13.209	8.67121	8.53253	10.78	16.2865	9.63248
cd6c2e41-4b67-4119-b710-3730311890b4-exon	0.493117	0.025832	0.0600445	343.433	395.985	244.599	473.123	490.632	426.793
cd9ab1b0-2049-4efe-b5ce-7da56b322f49-exon	-0.339737	0.073785	0.143071	385.391	323.725	352.678	306.632	278.907	255.631
ce51f6cc-483e-48cd-9dcd-ec80c94967a8-exon	-0.178632	0.601651	0.71812	48.1739	36.6118	34.1301	29.9445	34.6089	40.7528
cf1801ff-efe7-45a5-acb7-ef9ef4777979-exon	0.46537	0.165378	0.273051	47.3969	88.6391	45.5068	69.4712	105.862	76.3188
cf29630b-e384-4514-a8be-8d99b29babf0-exon	-0.477775	0.314273	0.448062	29.526	24.0867	21.3313	28.7467	17.3044	9.63248
cf422728-f8b6-4730-b173-fd0c0b5a3d18-exon	0.942592	0.00220151	0.00734482	39.6269	44.3195	56.8836	117.382	75.3252	76.3188
cf5a98a4-d960-48c0-ac1b-a48cb94ea447-exon	-2.27105	2.66479e-17	7.78914e-16	596.735	713.93	410.984	106.602	152.686	98.5476
cfad77c6-0d6f-4c5f-8c20-29f224005952-exon	-0.611375	0.00152414	0.0053179	715.616	857.487	967.021	579.725	589.369	492.738
cff500c6-a006-4388-b87d-fffc607367dc-exon	0.229184	0.404672	0.5418	57.4979	59.735	65.4161	58.6912	80.4148	73.355
d001fac4-31d2-498d-b34b-ed65cb7f49e6	0.0676869	0.810146	0.875096	82.3619	65.5158	85.3253	68.2734	103.827	71.8731
d05eff45-ba99-49ff-958e-0a02d8107fa2-exon	-0.149034	0.636922	0.745766	200.466	93.4564	98.1241	118.58	112.988	124.481
d0872519-221d-4ec4-bb9d-d8c3f293692d-exon	0.10381	0.664899	0.767347	118.881	124.287	96.7021	104.207	138.436	123.74
d08a28ec-5573-4305-9a47-9a0e03e06949-exon	-0.61527	0.000210327	0.000933374	713.285	813.167	820.545	512.65	516.079	502.371
d0d677b5-8537-4f16-962d-383cf3148f1e-exon	1.17917	0.0208058	0.0501109	9.32399	11.5616	5.68836	20.3622	21.3761	20.0059
d0e46db1-0b65-4c94-8619-8c1938a8dc7d-exon	-1.43482	3.92752e-07	3.10951e-06	183.372	302.529	163.54	74.2623	85.5043	80.7646
d0fe2867-b8c7-4cee-945b-d0db1e1ea296-exon	-0.266123	0.18554	0.298358	321.678	263.027	246.021	222.787	241.244	228.957
d149ddd4-95ba-4599-b27a-38a895c3e0f2-exon	0.232919	0.647418	0.754168	10.878	21.1963	12.7988	10.78	21.3761	20.0059
d1505898-52d4-4308-b54a-d9f8edf4c661-exon	0.234129	0.41254	0.549748	77.6999	79.9679	52.6173	97.0201	67.1819	85.9513
d2494aad-f2be-4845-81b3-da3b081949d3-exon	-4.59075	NA	NA	12.432	3.85387	282.996	3.59334	2.03582	6.66864
d26518d1-bb02-44da-857a-bbf740225556-exon	-0.508757	0.0149315	0.0379133	221.445	252.429	278.729	158.107	172.026	195.613
d26715a2-b581-4fb8-94ab-2c01b6abc3aa-exon	0.622348	0.00269703	0.00876179	137.529	155.118	177.761	243.149	223.94	252.667
d2cb33b4-61a5-4b99-94e7-7f0ce67e4067-exon	0.326951	0.226865	0.349059	92.4629	173.424	119.455	164.096	171.009	148.192
d3516a61-34e4-4cbf-80ac-62571500a7a6-exon	-0.609484	0.000892066	0.0033288	4420.35	6064.07	5831.99	3642.45	3356.04	3693.68
d375b936-3d1c-4bdc-9679-aeeaf1f80fc6-exon	0.69574	0.198887	0.314294	8.54699	6.74428	24.1755	17.9667	20.3582	22.2288
d45c713e-2694-4efb-a1cd-955cb5a30b7a-exon	0.494219	0.0145426	0.0370686	149.961	138.739	147.897	214.403	189.331	211.174
d470008c-117a-41cd-9803-33abf630c9a5-exon	0.491876	0.0878233	0.165158	57.4979	55.8812	38.3964	65.8779	74.3073	75.5779
d47a0805-ea9f-48c5-9461-5504798e4cf5-exon	-0.850695	0.162045	0.268796	16.317	8.67121	12.7988	7.18668	8.14327	5.92768
d5396f59-a07b-42a1-9bdc-e8d2f859b428-exon	0.639733	0.147941	0.250306	24.087	13.4886	12.7988	22.7578	31.5552	25.9336
d546f051-f2bb-4fa1-b049-a92c5edaec35-exon	0.0201129	0.962796	0.976389	32.6339	14.452	28.4418	31.1423	25.4477	20.7469
d5bd73ac-3016-4410-860d-fb69aea536a3-exon	-1.08123	1.83126e-07	1.53207e-06	261.849	230.269	278.729	112.591	129.274	121.517
d667e89d-bb00-4a42-afe6-703efd38d0f1-exon	-0.0339673	0.859211	0.908401	232.323	236.05	234.645	208.414	249.388	228.216
d6965a7c-11f1-4ad6-8e84-13a7d394cc68	-1.17753	8.37468e-06	5.12474e-05	238.539	189.803	145.053	99.4157	83.4685	73.355
d6c031d5-3a99-43c2-a5d3-95b45b88c6ce-exon	0.891714	2.89936e-06	1.94572e-05	541.568	441.268	624.297	982.179	950.726	1043.27
d6d7e2f8-d8d6-4133-b13c-6ec623837d90-exon	-0.795459	0.0691354	0.135837	54.3899	62.6254	21.3313	22.7578	37.6626	20.7469
d6e6aeb1-3f0c-45ad-8bc4-3e3d1f0e4a18-exon	0.540311	0.269253	0.398187	26.418	26.9771	7.11044	32.34	19.3403	38.5299
d7157e11-d086-440f-bae4-aaf4714f212f-exon	-0.0915295	0.676557	0.776707	254.079	189.803	189.138	210.809	206.635	180.053
d7660a66-b19d-49e1-a906-0d9824649141-exon	-3.63382	NA	NA	151.515	151.265	2561.18	81.449	58.0208	91.138
d815af15-06b2-4258-a700-0aa9f53e4f0d-exon	-0.277845	0.187865	0.301396	320.901	419.109	315.704	257.523	283.996	328.245
d86f503c-7d82-45b3-a1b1-ac6e6e5fc198-exon	2.09808	1.0222e-05	6.15263e-05	6.99299	13.4886	5.68836	44.3178	40.7163	29.6384
d87046a2-33cb-47b2-a5a6-3fa1cd340059-exon	-0.00448773	0.992379	0.99491	17.871	19.2694	14.2209	14.3734	23.4119	14.0782
d883e009-60e3-4bac-9070-6d111ce208a9-exon	0.254995	0.584809	0.704097	16.317	12.5251	17.0651	14.3734	21.3761	18.524
d8875d1d-9f66-4154-949d-a04f7d5be3ca-exon	-0.101586	0.720535	0.810042	68.3759	75.1505	51.1952	63.4823	54.967	64.4635
d89774db-de2c-4230-987e-ae1b42753c27-exon	0.676001	0.119859	0.211827	61.3829	122.36	25.5976	135.349	78.3789	123.74
d8b1853f-bac3-4f8d-b261-55d62751350c-exon	-1.07411	0.000176034	0.000794714	76.1459	92.4929	96.7021	50.3067	36.6447	39.2709
d8feacb2-bc5d-4ce9-8eb1-9ecf8e8a0f38-exon	1.13673	0.0627825	0.12562	5.43899	6.74428	7.11044	14.3734	18.3223	9.63248
d915b32b-35ca-4564-9755-e164107ee4a4-exon	0.71005	0.00306951	0.00980262	96.3479	85.7487	122.3	179.667	143.525	171.162
d9ae2b5c-880a-4ae4-a745-a4edfd52772a-exon	3.27562	1.08088e-10	1.45459e-09	17.871	4.81734	1.42209	103.009	89.5759	63.7225
da01499a-7de7-4a2e-9691-eeab51b2b6a9-exon	0.28397	0.304789	0.43783	101.787	138.739	170.651	212.007	153.704	133.373
db037b77-5ae0-44a8-a914-22ba5ac2687d-exon	-0.457567	0.124509	0.218183	156.177	271.698	140.787	159.305	106.88	148.933
dbdc6e7e-97ad-4348-80da-e4aae2b5bb87-exon	0.451621	0.0141849	0.0362951	379.952	320.835	399.607	534.21	501.829	468.287
dc21fab5-90cc-4adb-bb8f-3f0df5acbd88-exon	0.146302	0.515401	0.644358	276.612	322.762	237.489	372.509	254.477	302.312
dca7dc7f-b968-4ec5-abab-4e9dd61b7fbb-exon	-0.243898	0.323231	0.457709	127.428	99.2372	142.209	114.987	103.827	92.62
dd4e06e1-6391-4774-b156-0b65de5ad07d-exon	-0.345696	0.054461	0.111819	432.788	398.876	450.802	340.169	307.408	360.106
dd6abed1-3cff-40e2-9eac-db526a61d022-exon	0.312987	0.178721	0.289932	259.518	445.122	371.165	471.925	451.951	411.233
ddb9ce7d-a192-48f6-9f41-f3b0821782ed-exon	-1.19867	2.60762e-12	4.34985e-11	1149.96	1133.04	1322.54	479.112	533.384	555.72
ddd37574-f095-4c5e-bc3d-4bcec8ca6a2d-exon	-0.256366	0.147102	0.249272	622.376	556.885	668.382	555.77	475.363	514.967
de09ed4e-5ba7-498f-a15b-8334d3606f7c-exon	0.188033	0.544164	0.669112	60.6059	57.8081	66.8382	47.9112	93.6476	68.1683
de2a3655-e204-4c73-bb46-7d45a538517f-exon	-1.05764	0.00699241	0.0198327	51.2819	44.3195	36.9743	27.5489	12.2149	24.4517
de5f2080-379e-443c-a3a2-cda95a09043d-exon	-0.323646	0.218022	0.338125	129.759	168.607	231.801	122.173	148.615	148.933
de61c3ee-6bca-47ee-849e-80c4383af320-exon	0.227422	0.344415	0.480126	101.01	99.2372	81.0591	103.009	123.167	105.216
de8ba6bd-4d79-4864-bd9a-c1e5e15f32ff-exon	1.15832	1.18691e-05	7.04166e-05	58.2749	51.0638	45.5068	101.811	132.328	114.108
dffa7d38-6dac-471d-ac39-cf59f929cfe8-exon	-0.944021	7.14836e-06	4.43873e-05	2024.86	3010.84	1998.04	1290.01	1156.34	1210.73
e01f3707-805c-4659-81c0-c3bd3f5ae7e1-exon	0.00592449	0.984086	0.98978	54.3899	46.2465	56.8836	55.0979	59.0387	44.4576
e198ac98-b5d1-4b04-b4ad-faddf3742b62-exon	-0.151852	0.55012	0.674433	912.974	1770.85	1191.71	1214.55	998.568	1274.45
e1fb41a6-c033-47ed-8da3-dc5c03626ded-exon	-0.528795	0.277432	0.407531	20.979	13.4886	22.7534	16.7689	11.197	11.8554
e258f7eb-fbba-4abe-84c5-f45cde6190dc-exon	0.660304	0.00268327	0.00872579	280.497	408.511	422.36	638.416	602.602	512.003
e27552d7-619e-4add-a0b9-00c468f7e643-exon	0.0438212	0.89822	0.935997	51.2819	34.6849	31.286	46.7134	38.6805	37.7889
e2e96f8a-86e6-4184-9f6e-a2f4894102e9-exon	-0.142821	0.755734	0.835306	17.094	22.1598	24.1755	20.3622	25.4477	11.8554
e2ee7ed6-d4a4-4f44-8f73-dfea150f8af9-exon	-0.0430562	0.90715	0.941639	66.8219	63.5889	25.5976	43.1201	58.0208	52.6081
e30fc196-20b0-4876-8d92-78cfc1f87187-exon	0.00802863	0.963802	0.977191	578.864	492.332	611.498	536.605	566.975	586.099
e3a9dbc5-812a-4cfd-8921-a01b8bf608c5-exon	0.179463	0.340763	0.476198	328.67	323.725	396.763	365.323	426.504	392.709
e40bd71e-be1d-408d-9701-488f83b7abe9-exon	1.01929	0.0010175	0.00374048	38.8499	27.9406	35.5522	59.889	79.3968	68.1683
e41369aa-2c73-434d-9371-05d6a3bf8bc5-exon	0.864387	0.140479	0.240108	5.43899	8.67121	8.53253	16.7689	12.2149	11.8554
e45592b0-8d88-4825-acf2-db32beec66ac-exon	-0.0738246	0.71491	0.805508	1126.65	924.929	1350.98	1215.75	1016.89	998.814
e464d5e0-9135-4e37-be29-2c00991f9819-exon	-1.59024	4.28665e-11	6.1119e-10	216.006	296.748	237.489	85.0423	69.2178	94.1019
e566a28c-755e-4b32-b4f4-2f13a66b81d6-exon	0.224825	0.335576	0.470799	113.442	142.593	160.696	182.062	145.561	157.083
e5971f54-d482-429a-9fdc-9d9437fc9690-exon	-0.777494	0.00092686	0.00344621	221.445	284.223	180.605	134.151	130.292	137.078
e5979429-d9ce-494c-b6f3-3f42046e8e90-exon	-1.14112	0.000710096	0.002728	53.6129	61.662	88.1695	23.9556	35.6268	31.1203
e5f2e961-a42c-444c-b077-8c5fb65c3276-exon	-0.412029	0.0117177	0.0308773	1496.5	1641.75	1771.92	1147.47	1244.9	1294.46
e60c6607-977a-45e9-8ec1-0bc902b0d354-exon	0.933661	0.0624883	0.125197	10.101	16.379	8.53253	31.1423	16.2865	20.7469
e6af5622-9f0a-498a-bbda-2d0f503ae006-exon	-0.38545	0.027206	0.0627132	780.884	812.204	681.181	535.407	581.226	624.629
e73aca91-3484-4a50-b917-03fe4edf148d-exon	-0.905921	2.45522e-06	1.67032e-05	471.638	374.789	415.25	226.38	210.707	236.366
e75c7549-3f02-4e57-afee-bc1f0ccc73b2-exon	0.659679	0.00109918	0.00399877	196.581	237.013	277.307	380.894	362.375	374.185
e7a26c92-36e1-45d7-b1a0-3fc61920d962-exon	-0.498385	0.209522	0.327711	46.6199	40.4657	28.4418	27.5489	17.3044	37.048
e7c86ee4-93fc-44e6-88f0-b5a8ddcf65da-exon	-0.176507	0.419717	0.556932	299.922	251.465	209.047	197.634	239.208	237.848
e86abe51-97ff-4257-b9c0-587e8590167b-exon	-0.490996	0.0287739	0.0658275	195.804	250.502	174.917	138.942	155.74	148.192
e86c0062-a54a-42a0-b0b1-fa06598f49e6-exon	-0.290753	0.0949969	0.1762	921.521	860.377	1023.9	843.237	748.163	702.43
e882e7d0-ae5e-418f-b6f6-cf6031c48669-exon	1.72002	0.00519818	0.0154198	4.66199	10.5981	2.84418	22.7578	12.2149	25.9336
e89edf3d-849f-48cb-9497-e45b450fdaaf-exon	-0.28119	0.439204	0.575281	66.0449	51.0638	35.5522	49.109	27.4835	50.3853
e8ada0ea-602c-436b-8d1a-54069173863b-exon	-0.81038	0.112945	0.201966	24.087	29.8675	11.3767	14.3734	15.2686	8.89152
e9a09ce1-5aa3-4b8c-b3ef-054d323261e2-exon	0.12132	0.602569	0.71884	87.8009	92.4929	93.8579	98.2179	97.7192	101.511
e9e2aa95-a5bc-4ede-b4c5-208429616630-exon	-1.5147	1.76144e-10	2.31303e-09	257.187	189.803	246.021	82.6468	89.5759	71.1321
e9fac40e-6190-4118-8b1a-fb20c2b5bd6a-exon	-0.19788	0.441195	0.576811	161.616	101.164	139.365	124.569	125.203	102.252
ea13bafe-7ed8-45a5-b002-2c47b8be786c-exon	0.197251	0.367017	0.503549	269.619	186.913	251.71	251.534	260.585	298.607
ea52556a-373a-4951-872f-43567485ab3a-exon	0.900184	0.13616	0.234344	13.209	10.5981	1.42209	14.3734	18.3223	17.0421
eb46d6fb-6488-486c-ab96-d7099a60ec69-exon	0.326524	0.295315	0.42762	61.3829	48.1734	38.3964	56.2956	76.3431	55.572
eb61a1c2-7fbe-413e-a3d1-5e8c3197298d-exon	1.14758	2.31571e-05	0.000128481	48.1739	48.1734	52.6173	98.2179	132.328	98.5476
ebf308f9-83af-4cfc-8e3c-d67702d988df-exon	-0.486314	0.0917723	0.171171	89.3549	154.155	99.5462	68.2734	88.558	87.4332
ec374da1-8ea6-4d84-93c1-a6e04de35f6b-exon	0.260798	0.535131	0.66097	16.317	23.1232	18.4872	21.56	21.3761	25.9336
ec741ccc-042c-4b8a-941a-7a5be5cf42ea-exon	0.566295	0.00866239	0.0238244	185.703	202.328	145.053	245.545	294.175	253.408
ec8ad5c3-be6b-42bf-8d59-796587a9aa72-exon	-0.515621	0.0116609	0.0307456	252.525	263.99	327.08	183.26	208.671	195.613
ec9dd865-4473-45ce-85ff-4be3f8b57929-exon	1.7906	3.9047e-06	2.55415e-05	10.878	15.4155	15.643	50.3067	45.8059	46.6805
ecfc0207-ee1c-48b7-97bb-63e98a08cc86-exon	-1.18335	0.0438704	0.0935677	8.54699	28.904	21.3313	9.58223	7.12536	8.89152
ed57c10b-f4cf-4ea4-ba8e-6ab2fdce107d-exon	-0.213046	0.411122	0.548484	182.595	158.009	105.235	142.536	128.256	117.813
ed5e4faf-4edf-4343-a7de-1eb9cb300260-exon	-0.234966	0.529235	0.656165	26.418	40.4657	31.286	22.7578	29.5193	30.3793
ee50e304-a709-4212-b180-73c06ccbc5ae-exon	0.257934	0.202945	0.319157	210.567	262.063	210.469	299.445	254.477	264.523
ef2ad24d-eef8-4e1d-b089-4ad96a7ae51b-exon	0.489967	0.164455	0.271903	30.303	57.8081	36.9743	43.1201	70.2357	61.4997
efecff21-05f0-4a2b-bbec-9be73f9625ce-exon	-0.911821	0.00567316	0.0166252	48.9509	54.9177	52.6173	22.7578	32.5731	27.4155
ENSRNA049373473-E1	0.398644	0.19566	0.3104	99.4558	64.5524	150.741	142.536	150.65	118.554
ENSRNA049373475-E1	0.847241	0.580397	0.700664	0	3.85387	28.4418	26.3511	15.2686	15.5602
ENSRNA049373486-E1	-0.349076	0.506995	0.637207	9.32399	22.1598	17.0651	11.9778	12.2149	13.3373
ENSRNA049373506-E1	0.213273	0.498836	0.629314	43.5119	47.2099	63.994	74.2623	57.0029	47.4214
ENSRNA049373512-E1	-0.939779	0.0142432	0.0364197	45.8429	49.1369	27.0197	20.3622	23.4119	20.7469
ENSRNA049373513-E1	-2.78629	0.000118306	0.000558884	18.648	20.2328	17.0651	1.19778	1.01791	5.18672
ENSRNA049373514-E1	0.858529	0.0243405	0.0571611	23.31	18.3059	24.1755	51.5045	36.6447	31.8613
ENSRNA049373516-E1	0.0435679	0.926162	0.953636	32.6339	21.1963	95.28	52.7023	55.985	42.2347
ENSRNA049373517-E1	-1.25584	1.14467e-06	8.31659e-06	125.874	129.105	120.878	52.7023	62.0924	43.7166
ENSRNA049373538-E1	0.307094	0.362225	0.498661	189.588	190.767	452.224	378.498	388.841	258.595
ENSRNA049373546-E1	0.768048	0.157199	0.262594	12.432	7.70775	8.53253	13.1756	22.394	14.0782
ENSRNA049373554-E1	-1.20148	0.000198701	0.000886618	121.989	87.6756	200.515	58.6912	62.0924	56.3129
ENSRNA049373594-E1	0.00950668	0.969863	0.981079	148.407	105.981	126.566	135.349	146.579	103.734
ENSRNA049373596-E1	0.609226	0.182682	0.294761	13.986	13.4886	31.286	21.56	36.6447	28.1565
ENSRNA049373600-E1	-0.0765996	0.90506	0.940285	6.99299	8.67121	36.9743	9.58223	16.2865	21.4878
ENSRNA049373611-E1	-0.446956	0.358978	0.495212	25.641	20.2328	75.3707	34.7356	30.5372	22.2288
ENSRNA049373615-E1	1.25303	0.0100158	0.0270149	11.655	11.5616	7.11044	28.7467	27.4835	18.524
ENSRNA049373622-E1	-0.151867	0.654724	0.759879	31.857	36.6118	46.9289	33.5378	35.6268	33.3432
f05c6e33-23e3-4c23-981a-6c54073bcb76-exon	1.29369	0.0145533	0.0370877	6.21599	8.67121	15.643	26.3511	15.2686	29.6384
f0d00b55-0e67-4bee-a6c7-f995d8be93ed-exon	1.56604	1.26361e-12	2.19134e-11	200.466	229.305	324.236	768.974	688.106	761.707
f0f25944-be27-4d03-8899-813ae9241d40-exon	-2.05468	2.21925e-32	1.83088e-30	2180.26	1788.2	2120.33	507.858	449.915	507.557
f10fbd16-24f9-4c26-90f0-6284513ce518-exon	6.77353	5.77713e-95	5.48105e-92	18.648	21.1963	31.286	2539.29	3407.96	1639.74
f1a6a6d0-92c2-49b2-b5ff-46823eb11688-exon	-0.136786	0.437337	0.573528	542.345	571.337	602.966	459.947	539.491	558.684
f27211f3-1065-461d-8bb4-f843df9ae1c1-exon	-1.3907	2.13805e-09	2.4415e-08	176.379	175.351	169.229	65.8779	58.0208	74.096
f297dcb8-8cc6-4855-9385-5a35834cc3b1-exon	-0.0744354	0.803929	0.870715	96.3479	160.899	78.2149	113.789	93.6476	112.626
f29d4842-de06-4128-8619-09b482f507ca-exon	1.17034	0.000314094	0.00132813	30.303	46.2465	49.7731	95.8223	117.059	68.9092
f2daf733-bc8a-4e90-9175-57095bc1c3fb-exon	0.457682	0.0360666	0.0796003	160.062	157.045	127.988	196.436	233.101	185.24
f36a6c57-3bc9-4a78-8b91-75aabd493e93-exon	0.0426509	0.858118	0.907708	401.708	654.195	422.36	535.407	552.724	436.425
f37cebd2-1d80-4a1a-ab93-e95b56941f08-exon	-0.315045	0.069495	0.136379	623.153	614.693	712.467	565.352	491.65	509.78
f3812188-5967-4656-add3-4a8ba088b594-exon	0.554491	0.181013	0.292815	51.2819	26.0136	96.7021	112.591	68.1999	71.8731
f3b391a5-8786-428b-97ec-db73797849b1-exon	-1.27968	1.84954e-08	1.83104e-07	268.065	360.337	311.437	142.536	104.845	139.3
f3de3c91-e10b-4ada-9d62-a0b5768b5bcb-exon	1.17363	2.12741e-06	1.47014e-05	347.318	223.525	184.872	567.747	563.921	582.394
f41ce9e9-a14b-452c-8e67-501cc4625eb6-exon	0.962945	0.0489045	0.102499	29.526	5.78081	27.0197	47.9112	32.5731	40.7528
f4bca43c-a781-46a7-9c10-93f07fda1485-exon	0.175351	0.478975	0.611269	97.9018	130.068	99.5462	114.987	144.543	111.144
f5057a68-c0c2-42af-886d-181310abfdb2-exon	0.975835	0.00120828	0.00433813	2504.27	2811.4	5733.86	7186.68	8539.23	5997.33
f539f8d7-30e5-4e5a-9c10-5e45f2d7d3ff-exon	1.4006	9.5266e-09	9.87349e-08	240.093	253.392	398.185	897.137	655.533	790.604
f53fcf01-7932-42a2-bc79-99d35b219f61-exon	-0.748572	0.00282946	0.00914764	193.473	263.99	167.806	122.173	143.525	108.18
f552d7e4-ee71-4c1a-abc8-15ab6282f577-exon	0.546147	0.148134	0.250557	66.8219	108.872	41.2406	111.393	66.164	140.782
f5a7f18d-2387-4dd5-8f4b-dbd602d729c7-exon	-0.407847	0.0605918	0.122074	398.6	486.551	319.97	289.863	282.978	336.396
f5d17835-5ac5-49bd-b967-3c3973adee00-exon	2.06682	1.82121e-07	1.5246e-06	9.32399	16.379	17.0651	56.2956	47.8417	69.6502
f7127540-521f-4b8a-a03b-4c13d6aa621d-exon	2.2084	4.75328e-05	0.000245815	3.88499	8.67121	5.68836	22.7578	34.6089	25.9336
f7470640-9146-4bbf-9ebd-f509fe31c435-exon	-0.13324	0.557753	0.680749	138.306	131.995	115.189	130.558	105.862	117.072
f871aa93-f9be-4916-819d-f679c45082c5-exon	-0.606048	0.000947025	0.0035103	1114.99	1235.17	930.046	662.372	736.966	756.52
f88d753f-997a-4ed8-8598-9b5db1704619-exon	-1.44335	7.24354e-08	6.52951e-07	333.332	501.967	291.528	152.118	106.88	155.602
f8c32f90-08f5-4ec0-94a1-14d80581299f-exon	-0.895149	0.0658182	0.130479	20.979	29.8675	18.4872	8.38446	11.197	17.0421
f95fd371-440b-441d-bbb5-437a46acfa55-exon	-0.97816	0.0130269	0.0337531	52.8359	36.6118	28.4418	19.1645	22.394	19.265
f980929f-3bd6-4675-9924-1e13023fedb9-exon	-4.01347	3.94718e-28	2.59013e-26	247.863	555.921	284.418	15.5711	23.4119	27.4155
f9a27863-93e9-45c6-a7f8-f064ef134757-exon	-0.309805	0.608065	0.7232	14.763	8.67121	15.643	15.5711	4.07163	11.8554
f9b952ba-1969-4200-82f3-bd6d3058effa-exon	0.52461	0.0366515	0.0806802	73.8149	71.2966	58.3056	103.009	96.7013	95.5838
f9ca535b-128f-443c-977f-c18d375b744a-exon	2.70936	8.32711e-09	8.69763e-08	4.66199	6.74428	18.4872	55.0979	50.8954	73.355
f9cc0f2e-5c84-443b-9fd9-fed649e7cc46-exon	0.532476	0.0151629	0.0383878	108.78	93.4564	106.657	148.525	147.597	150.415
f9cf4b30-3af4-45e1-9435-773cccdf474d-exon	-0.774117	0.000455128	0.00184465	401.708	448.976	315.704	216.798	266.692	200.8
f9e4b87e-9722-4ce1-afe2-95c0fdae2475-exon	-0.663334	0.0185377	0.0454364	227.661	257.246	440.848	222.787	199.51	160.788
f9ed8aa5-37ac-4c1d-83a1-59a3b024ac5e-exon	0.603569	0.00342041	0.0107543	139.86	131.995	163.54	232.369	215.797	211.174
fa662a98-a972-4f3f-8a85-18b32e90903b	0.17366	0.417169	0.554392	236.985	195.584	221.846	214.403	232.083	289.715
fab9a2e1-5945-4ff0-9a60-0540bc01a4d2-exon	0.167305	0.455948	0.590252	243.978	177.278	169.229	215.6	210.707	239.33
facb1810-dbae-4e06-96e1-9b775cfdb7e8-exon	-0.436029	0.0408583	0.0883853	214.452	245.684	189.138	146.129	176.098	158.565
fafa7e84-cb43-4da5-ab14-043c948ec0f0-exon	1.39879	0.00106703	0.00390051	10.878	13.4886	15.643	32.34	42.7521	28.8974
fb841704-10e2-4af9-a4b5-2dbd4e06c46a-exon	-1.93096	6.58197e-08	5.96622e-07	41928.4	22306.2	82284.9	12412.6	12045.9	13965.6
fc024117-9c0c-4702-bb3b-b8518eb5282d-exon	-0.372357	0.0503311	0.104958	372.959	421.999	401.029	286.269	283.996	351.215
fc12c1c9-605c-4cdc-af40-e06632ebb1e9-exon	2.3656	9.86611e-11	1.33721e-09	17.871	14.452	31.286	80.2512	138.436	98.5476
fcd43dae-5c20-42d8-99b8-78b2ae3ffcaf-exon	0.821354	0.00193969	0.0065842	153.069	164.753	280.152	347.356	304.355	396.413
fda962e1-1e04-4199-9045-5b37c9e9a494-exon	0.0146927	0.953967	0.971192	110.334	115.616	79.637	92.229	117.059	101.511
fdaa4296-03ec-4719-8466-2254014dc07d-exon	-0.119411	0.627427	0.737905	90.9089	105.018	82.4812	80.2512	87.5401	88.9152
febeba60-d4ec-4e51-a750-f97fb30f1537-exon	-0.143115	0.446277	0.581335	578.087	595.423	732.376	558.165	528.294	635.002
fecd6a07-a451-4dc1-b520-264544ce7ee7-exon	0.875119	0.00355941	0.0111284	33.4109	40.4657	44.0848	82.6468	71.2536	61.4997
feee66b7-75c6-46ad-8584-d6cebc977db7-exon	-0.12272	0.748887	0.830192	25.641	31.7944	29.8639	29.9445	19.3403	30.3793
ff02a441-b581-4ebc-bdf2-3395d4815477-exon	1.12405	0.0380194	0.0831562	10.878	8.67121	5.68836	21.56	22.394	13.3373
ff4a058c-cf14-4946-9607-26fe8a84892b-exon	-0.138918	0.644515	0.752132	52.0589	48.1734	55.4615	55.0979	39.6984	46.6805
ff6fb020-6066-4fff-a357-27822739b065-exon	-2.76014	9.96207e-20	3.6178e-18	314.685	293.858	220.424	62.2845	30.5372	31.8613
ff92856b-4c0c-4d81-8c94-b8a5a3389099-exon	0.191593	0.445436	0.580505	96.3479	86.7121	75.3707	87.4379	112.988	96.3248
ffaec466-4eb0-4877-9ed4-3b99354d2151-exon	0.37216	0.383347	0.519913	26.418	25.0502	14.2209	20.3622	27.4835	37.7889
ffc20b89-d8cd-416e-9b5f-7454aba20418-exon	-0.696897	0.000544358	0.00215941	1872.57	2610.04	2652.2	1587.06	1287.65	1524.89
VDAG_JR2_Chr1g00010.1-1	-0.0339205	0.891423	0.931386	309.246	246.648	172.073	213.205	245.316	255.631
VDAG_JR2_Chr1g00010.1-2	-0.139526	0.521353	0.649516	181.818	161.863	137.943	143.734	153.704	142.264
VDAG_JR2_Chr1g00010.1-3	-0.305252	0.289017	0.420533	95.5709	68.4062	61.1498	57.4934	60.0566	65.9454
VDAG_JR2_Chr1g00010.1-4	-0.152953	0.542186	0.667509	138.306	105.018	95.28	112.591	94.6655	100.03
VDAG_JR2_Chr1g00020.1-1	0.593065	0.00947194	0.0257739	183.372	197.511	152.164	210.809	299.265	294.902
VDAG_JR2_Chr1g00020.1-2	0.804577	0.00160479	0.00555673	134.421	97.3103	82.4812	213.205	169.991	171.903
VDAG_JR2_Chr1g00030.1-1	-0.356273	0.04525	0.0960335	909.866	1175.43	1062.3	764.183	836.721	855.808
VDAG_JR2_Chr1g00030.1-2	-0.489391	0.0152267	0.0385277	315.462	415.255	321.392	243.149	242.262	263.782
VDAG_JR2_Chr1g00040.1-1	-0.975838	0.000222803	0.000980901	247.863	228.342	162.118	81.449	112.988	129.668
VDAG_JR2_Chr1g00040.1-2	-0.777024	6.84746e-06	4.26818e-05	607.613	560.738	550.348	315.016	331.838	355.661
VDAG_JR2_Chr1g00050.1-1	0.100037	0.545562	0.670575	1591.29	1318.02	1525.9	1637.36	1483.09	1633.08
VDAG_JR2_Chr1g00060.1-1	-0.693101	0.23803	0.36213	17.094	11.5616	11.3767	7.18668	12.2149	5.92768
VDAG_JR2_Chr1g00060.1-2	-1.35819	0.0259445	0.0602751	23.31	22.1598	9.95462	2.39556	10.1791	8.89152
VDAG_JR2_Chr1g00070.1-1	-0.796752	0.00201821	0.00681919	128.205	208.109	162.118	86.2401	95.6834	103.734
VDAG_JR2_Chr1g00090.1-3	-0.183382	0.245606	0.371098	1075.37	1117.62	1097.85	899.532	1032.16	965.47
VDAG_JR2_Chr1g00100.1-1	-2.28366	4.07669e-16	1.04534e-14	3942.49	7669.21	7335.13	1387.03	1552.31	952.874
VDAG_JR2_Chr1g00100.1-2	-2.31394	5.53844e-14	1.12098e-12	701.63	1371.98	1508.84	263.511	291.122	166.716
VDAG_JR2_Chr1g00100.1-3	-2.38226	1.14691e-15	2.80205e-14	2807.3	5499.48	5408.2	1013.32	1031.14	587.581
VDAG_JR2_Chr1g00100.1-4	-2.60811	4.09377e-18	1.29826e-16	490.286	971.176	684.025	138.942	135.382	79.2827
VDAG_JR2_Chr1g00110.1-1	0.32247	0.359806	0.496106	29.526	32.7579	32.708	41.9223	47.8417	29.6384
VDAG_JR2_Chr1g00110.1-2	0.291595	0.410771	0.548224	27.195	33.7214	29.8639	33.5378	45.8059	31.8613
VDAG_JR2_Chr1g00110.1-3	-0.0616728	0.734929	0.82027	579.641	735.126	611.498	567.747	644.336	632.78
VDAG_JR2_Chr1g00110.1-4	0.163755	0.775213	0.849901	13.209	15.4155	4.26627	13.1756	13.2328	11.8554
VDAG_JR2_Chr1g00120.1-1	-0.749992	0.00093476	0.00347065	443.666	735.126	567.414	323.4	343.035	370.48
VDAG_JR2_Chr1g00120.1-2	-0.76133	3.21302e-05	0.000172915	1745.92	2426.98	2089.05	1230.12	1192.99	1270
VDAG_JR2_Chr1g00120.1-3	-0.715981	6.26084e-05	0.000315327	2862.46	3908.79	3529.62	2100.9	2015.46	2153.23
VDAG_JR2_Chr1g00130.1-1	0.0681038	0.797363	0.866302	97.9018	79.0044	65.4161	85.0423	92.6297	79.2827
VDAG_JR2_Chr1g00130.1-2	0.202022	0.463666	0.597255	97.9018	65.5158	63.994	88.6357	93.6476	82.2465
VDAG_JR2_Chr1g00140.1-1	1.21878	0.000286264	0.00122339	33.4109	19.2694	28.4418	56.2956	69.2178	63.7225
VDAG_JR2_Chr1g00140.1-2	0.670564	0.0734732	0.142594	24.087	26.0136	18.4872	29.9445	36.6447	42.9757
VDAG_JR2_Chr1g00150.1-1	1.45736	3.26133e-05	0.000175226	29.526	17.3424	18.4872	56.2956	61.0745	65.2045
VDAG_JR2_Chr1g00150.1-2	1.05759	0.0467721	0.0987757	9.32399	4.81734	18.4872	19.1645	23.4119	22.2288
VDAG_JR2_Chr1g00160.1-1	1.99684	6.92889e-06	4.31539e-05	13.209	12.5251	4.26627	38.3289	46.8238	40.7528
VDAG_JR2_Chr1g00160.1-2	1.59035	1.1303e-06	8.22533e-06	22.533	22.1598	19.9092	62.2845	68.1999	65.2045
VDAG_JR2_Chr1g00160.1-3	1.75633	2.55162e-05	0.000140136	9.32399	15.4155	11.3767	41.9223	42.7521	37.048
VDAG_JR2_Chr1g00170.1-1	-0.328574	0.0401453	0.0870414	934.73	896.989	1025.33	741.425	771.574	760.225
VDAG_JR2_Chr1g00170.1-2	-0.509865	0.0322914	0.0727131	163.947	138.739	200.515	131.756	116.042	105.216
VDAG_JR2_Chr1g00200.1-1	-0.442159	0.0389592	0.084882	308.469	348.775	243.177	212.007	208.671	243.035
VDAG_JR2_Chr1g00200.1-3	-0.804542	0.0223983	0.0533428	41.1809	46.2465	36.9743	23.9556	21.3761	25.9336
VDAG_JR2_Chr1g00210.1-1	0.139779	0.661759	0.764785	90.1319	91.5295	51.1952	62.2845	85.5043	109.662
VDAG_JR2_Chr1g00210.1-2	-0.15491	0.378233	0.514817	417.248	375.753	382.542	368.916	356.268	332.691
VDAG_JR2_Chr1g00210.1-3	-0.0781297	0.648564	0.755	782.438	774.628	686.869	646.801	769.539	710.58
VDAG_JR2_Chr1g00220.1-1	-0.392501	0.21567	0.335274	59.0519	57.8081	42.6627	47.9112	33.591	41.4937
VDAG_JR2_Chr1g00220.1-2	-0.0363537	0.848426	0.901688	879.563	652.268	715.311	670.756	734.93	786.158
VDAG_JR2_Chr1g00230.1-1	-0.594104	0.00566926	0.0166181	435.896	404.657	332.769	309.027	220.886	250.444
VDAG_JR2_Chr1g00230.1-2	-0.49442	0.0213601	0.0512723	319.347	260.136	257.398	229.974	169.991	196.354
VDAG_JR2_Chr1g00230.1-3	-0.31078	0.0890469	0.16699	620.045	608.912	507.686	422.816	482.489	495.702
VDAG_JR2_Chr1g00240.1-1	-0.423364	0.11781	0.20887	87.0239	128.141	127.988	77.8557	75.3252	100.03
VDAG_JR2_Chr1g00240.1-2	-0.41513	0.258631	0.38561	33.4109	27.9406	36.9743	25.1534	25.4477	22.9697
VDAG_JR2_Chr1g00250.1-1	0.23759	0.300728	0.4335	130.536	102.128	120.878	150.92	124.185	142.264
VDAG_JR2_Chr1g00250.1-2	0.122561	0.627793	0.738217	87.8009	85.7487	88.1695	75.4601	105.862	102.252
VDAG_JR2_Chr1g00260.1-1	-1.33828	7.75205e-07	5.79115e-06	99.4558	125.251	106.657	50.3067	40.7163	40.7528
VDAG_JR2_Chr1g00260.1-2	-1.25099	8.02148e-06	4.93113e-05	128.982	218.707	221.846	76.6579	91.6117	70.3912
VDAG_JR2_Chr1g00260.1-3	-1.44566	3.22366e-09	3.59818e-08	418.802	668.647	497.731	192.842	230.047	160.047
VDAG_JR2_Chr1g00280.1-1	-2.44468	0.00724399	0.0204546	192.696	211.963	1362.36	86.2401	103.827	134.114
VDAG_JR2_Chr1g00290.1-1	-0.0869606	0.602364	0.718697	628.592	624.327	611.498	640.812	551.706	564.611
VDAG_JR2_Chr1g00290.1-2	0.0177111	0.94796	0.967593	60.6059	65.5158	61.1498	56.2956	69.2178	63.7225
VDAG_JR2_Chr1g00290.1-3	0.381013	0.131563	0.227999	70.7069	68.4062	63.994	82.6468	96.7013	85.9513
VDAG_JR2_Chr1g00290.1-4	-0.214284	0.301345	0.434164	158.508	150.301	152.164	130.558	134.364	132.632
VDAG_JR2_Chr1g00300.1-2	0.411521	0.158177	0.263899	46.6199	60.6985	44.0848	77.8557	62.0924	62.9816
VDAG_JR2_Chr1g00310.1-1	1.11354	1.74576e-06	1.22386e-05	79.2539	83.8217	75.3707	189.249	181.188	148.192
VDAG_JR2_Chr1g00310.1-2	0.563316	0.118267	0.209446	20.979	43.3561	31.286	49.109	47.8417	43.7166
VDAG_JR2_Chr1g00320.1-1	2.95164	1.32917e-26	7.82045e-25	190.365	397.912	236.067	2218.29	2427.71	1733.1
VDAG_JR2_Chr1g00330.1-1	0.107348	0.866985	0.913509	6.21599	17.3424	5.68836	14.3734	8.14327	9.63248
VDAG_JR2_Chr1g00330.1-2	0.248682	0.274027	0.403466	302.253	476.917	486.354	536.605	489.614	474.214
VDAG_JR2_Chr1g00330.1-3	0.116725	0.653709	0.759272	94.7939	144.52	95.28	135.349	110.952	117.813
VDAG_JR2_Chr1g00340.1-1	0.851763	0.00012786	0.000598799	466.199	292.894	349.834	589.307	708.464	706.135
VDAG_JR2_Chr1g00340.1-2	0.721933	0.0372529	0.0817746	73.8149	35.6483	32.708	83.8446	74.3073	80.7646
VDAG_JR2_Chr1g00340.1-3	1.03862	4.38286e-07	3.44487e-06	243.978	184.022	200.515	394.069	416.324	482.365
VDAG_JR2_Chr1g00350.1-1	1.06792	2.00998e-07	1.66851e-06	129.759	114.653	129.41	283.874	260.585	240.071
VDAG_JR2_Chr1g00360.1-1	0.188659	0.352126	0.488093	237.762	190.767	187.716	231.171	231.065	242.294
VDAG_JR2_Chr1g00360.1-2	0.362245	0.321056	0.45531	48.1739	35.6483	45.5068	80.2512	33.591	53.3491
VDAG_JR2_Chr1g00370.1-1	-1.15237	5.18367e-05	0.000265778	399.377	296.748	645.628	208.414	176.098	217.101
VDAG_JR2_Chr1g00370.1-2	-1.31492	4.82675e-06	3.09679e-05	218.337	162.826	325.658	87.4379	85.5043	108.921
VDAG_JR2_Chr1g00370.1-3	-1.13487	0.000428467	0.00174842	282.051	263.99	607.232	202.425	142.507	178.571
VDAG_JR2_Chr1g00370.1-4	-0.704877	0.18483	0.297501	26.418	13.4886	42.6627	9.58223	13.2328	25.9336
VDAG_JR2_Chr1g00370.1-5	-1.10547	0.000180761	0.000814552	777.776	579.044	1342.45	481.507	349.143	422.347
VDAG_JR2_Chr1g00370.1-6	-1.19068	7.62608e-05	0.000375126	179.487	158.009	329.925	88.6357	97.7192	103.734
VDAG_JR2_Chr1g00380.1-1	-0.350567	0.223873	0.345352	93.2399	61.662	89.5916	52.7023	72.2715	65.9454
VDAG_JR2_Chr1g00390.1-1	3.87355	4.1523e-17	1.18333e-15	3.88499	4.81734	14.2209	98.2179	128.256	78.5417
VDAG_JR2_Chr1g00390.1-2	3.66438	5.12825e-25	2.68437e-23	10.878	18.3059	21.3313	192.842	273.817	154.861
VDAG_JR2_Chr1g00390.1-3	3.34444	1.41439e-17	4.26566e-16	14.763	8.67121	22.7534	179.667	180.17	96.3248
VDAG_JR2_Chr1g00390.1-4	4.06405	2.09876e-34	1.99953e-32	18.648	23.1232	22.7534	373.707	466.202	232.661
VDAG_JR2_Chr1g00390.1-5	3.51948	1.66152e-28	1.10622e-26	21.756	24.0867	19.9092	223.985	337.946	197.095
VDAG_JR2_Chr1g00400.1-1	2.05773	2.00639e-15	4.75396e-14	203.574	199.438	337.035	1089.98	1181.79	794.309
VDAG_JR2_Chr1g00400.1-2	1.98897	4.70326e-16	1.19791e-14	75.3689	79.0044	105.235	377.3	375.608	269.709
VDAG_JR2_Chr1g00400.1-3	2.04097	1.74656e-14	3.71674e-13	362.858	448.976	679.759	1990.71	2523.39	1607.88
VDAG_JR2_Chr1g00410.1-1	-0.695456	0.000299821	0.00127415	449.882	539.542	426.627	288.665	317.587	269.709
VDAG_JR2_Chr1g00420.1-2	-0.265288	0.32459	0.45932	4393.93	8595.1	7865.57	5460.68	7133.5	4756.22
VDAG_JR2_Chr1g00420.1-3	-0.537036	0.0379376	0.0830295	292.929	464.392	406.717	225.183	348.125	228.216
VDAG_JR2_Chr1g00420.1-4	-0.312484	0.247758	0.373531	138.306	213.89	172.073	140.14	176.098	106.698
VDAG_JR2_Chr1g00420.1-6	-0.378205	0.156254	0.261317	627.815	1217.82	976.975	734.239	863.186	574.244
VDAG_JR2_Chr1g00430.1-1	0.167061	0.683867	0.782495	19.425	26.0136	21.3313	21.56	21.3761	31.1203
VDAG_JR2_Chr1g00430.1-2	0.936179	2.64683e-06	1.79104e-05	165.501	155.118	176.339	306.632	354.232	288.974
VDAG_JR2_Chr1g00430.1-3	0.313482	0.394455	0.53093	26.418	25.0502	29.8639	27.5489	41.7342	31.1203
VDAG_JR2_Chr1g00450.1-1	-0.680019	0.00296272	0.00950994	285.159	414.291	321.392	178.469	213.761	243.035
VDAG_JR2_Chr1g00450.1-2	0.464696	0.153631	0.257806	31.857	30.831	31.286	44.3178	41.7342	43.7166
VDAG_JR2_Chr1g00460.1-1	-0.136153	0.442525	0.578025	354.311	343.958	321.392	300.643	324.713	303.793
VDAG_JR2_Chr1g00460.1-2	-0.250415	0.140671	0.240346	783.215	896.989	876.007	774.963	716.607	657.972
VDAG_JR2_Chr1g00460.1-3	-0.0664155	0.810082	0.875086	64.4909	67.4428	58.3056	65.8779	51.9133	64.4635
VDAG_JR2_Chr1g00460.1-4	0.166902	0.503158	0.633762	78.4769	78.0409	91.0137	81.449	102.809	91.879
VDAG_JR2_Chr1g00460.1-5	-0.049626	0.821345	0.882295	257.964	284.223	315.704	223.985	334.892	267.486
VDAG_JR2_Chr1g00460.1-6	-0.173438	0.471078	0.604439	206.682	209.073	216.158	241.951	177.116	143.746
VDAG_JR2_Chr1g00470.1-1	-1.92747	1.73651e-18	5.68926e-17	1448.33	2432.76	2026.48	518.638	527.276	506.816
VDAG_JR2_Chr1g00470.1-2	-1.78341	1.65824e-13	3.17029e-12	718.724	1293.94	1097.85	293.456	329.802	280.083
VDAG_JR2_Chr1g00470.1-3	-2.00196	9.14446e-16	2.2608e-14	417.248	705.259	514.796	159.305	122.149	128.186
VDAG_JR2_Chr1g00480.1-1	-0.349761	0.0480948	0.101026	689.198	753.432	706.778	493.485	626.014	566.093
VDAG_JR2_Chr1g00480.1-2	-0.656591	0.00113348	0.00410714	307.692	264.954	310.015	170.085	178.134	209.692
VDAG_JR2_Chr1g00490.1-1	-0.557153	0.00124288	0.00444578	1109.55	1063.67	890.228	664.768	705.41	713.544
VDAG_JR2_Chr1g00490.1-2	-0.535048	0.00150072	0.00524665	2542.34	2401.93	2081.94	1581.07	1754.87	1516
VDAG_JR2_Chr1g00490.1-3	-0.796885	0.00238466	0.00788081	494.171	437.415	248.866	225.183	230.047	226.734
VDAG_JR2_Chr1g00490.1-4	-0.379455	0.0408674	0.0883881	620.822	646.487	527.595	406.047	489.614	484.588
VDAG_JR2_Chr1g00500.1-1	-0.182245	0.284425	0.415497	494.171	487.515	501.997	398.861	449.915	457.172
VDAG_JR2_Chr1g00500.1-2	-0.166663	0.293112	0.425196	1781.66	1551.18	1560.03	1492.43	1392.5	1475.99
VDAG_JR2_Chr1g00500.1-3	-0.567664	0.0420614	0.0904551	111.888	103.091	83.9032	87.4379	55.985	60.7587
VDAG_JR2_Chr1g00510.1-1	0.0579295	0.816734	0.879583	98.6788	141.63	102.39	132.954	117.059	108.18
VDAG_JR2_Chr1g00510.1-2	0.250512	0.449097	0.583866	45.0659	64.5524	35.5522	70.669	58.0208	46.6805
VDAG_JR2_Chr1g00520.1-1	-1.45822	9.90548e-14	1.96128e-12	522.92	527.017	544.66	167.689	183.223	226.734
VDAG_JR2_Chr1g00530.1-1	-0.305695	0.219435	0.339946	156.954	126.214	102.39	107.8	96.7013	109.662
VDAG_JR2_Chr1g00530.1-2	-0.27069	0.174699	0.285358	448.328	414.291	327.08	304.236	344.053	340.1
VDAG_JR2_Chr1g00540.1-1	-0.26694	0.342072	0.477647	191.142	126.214	99.5462	108.998	129.274	111.144
VDAG_JR2_Chr1g00550.1-1	-1.95271	5.78999e-08	5.29896e-07	1389.27	1115.7	3566.6	477.914	510.99	577.949
VDAG_JR2_Chr1g00550.1-2	-0.6216	0.00130876	0.0046505	316.239	334.323	278.729	213.205	205.617	187.463
VDAG_JR2_Chr1g00560.1-1	-0.513747	0.00905964	0.0247645	518.258	723.565	658.427	412.036	467.22	449.763
VDAG_JR2_Chr1g00560.1-2	-0.229483	0.177612	0.28853	695.414	851.706	794.948	682.734	663.676	650.563
VDAG_JR2_Chr1g00560.1-3	-0.289816	0.217309	0.337249	573.425	757.286	436.581	459.947	443.808	543.123
VDAG_JR2_Chr1g00570.1-1	-0.345446	0.129266	0.225065	479.408	351.666	319.97	253.929	325.731	327.504
VDAG_JR2_Chr1g00570.1-2	-0.353945	0.190832	0.304672	97.1249	76.114	79.637	73.0645	71.2536	55.572
VDAG_JR2_Chr1g00580.1-1	0.266283	0.138863	0.237988	327.893	280.369	295.795	354.543	362.375	371.221
VDAG_JR2_Chr1g00590.1-1	0.264913	0.161451	0.267986	204.351	195.584	207.625	238.358	234.119	256.372
VDAG_JR2_Chr1g00590.1-2	-0.0850725	0.833503	0.890524	24.864	31.7944	25.5976	35.9334	24.4298	18.524
VDAG_JR2_Chr1g00590.1-3	0.321184	0.0674693	0.133133	376.067	386.351	449.38	510.254	486.56	513.485
VDAG_JR2_Chr1g00600.1-1	0.328516	0.176935	0.287814	97.1249	81.8948	96.7021	130.558	98.7371	117.072
VDAG_JR2_Chr1g00600.1-2	0.361026	0.0960316	0.177718	170.94	134.886	130.832	178.469	194.42	190.427
VDAG_JR2_Chr1g00600.1-3	0.342411	0.0755485	0.145944	458.429	404.657	329.925	499.474	496.739	520.895
VDAG_JR2_Chr1g00610.1-1	0.0421827	0.889978	0.930441	44.2889	51.0638	44.0848	56.2956	43.7701	44.4576
VDAG_JR2_Chr1g00610.1-2	0.177587	0.368358	0.504938	451.436	533.761	416.672	449.167	567.993	568.316
VDAG_JR2_Chr1g00610.1-3	0.0682656	0.734737	0.820096	216.006	218.707	173.495	213.205	213.761	213.396
VDAG_JR2_Chr1g00620.1-1	-0.0025444	0.988382	0.992173	954.932	1120.51	1141.94	1141.48	955.816	1112.18
VDAG_JR2_Chr1g00620.1-2	-0.15824	0.378371	0.514851	473.969	527.017	449.38	457.552	391.895	451.244
VDAG_JR2_Chr1g00630.1-1	-0.480897	0.189511	0.303117	36.5189	56.8446	31.286	34.7356	27.4835	28.1565
VDAG_JR2_Chr1g00630.1-2	0.630411	0.0345133	0.076805	95.5709	158.972	92.4358	141.338	236.155	160.788
VDAG_JR2_Chr1g00640.1-1	1.12797	0.0135219	0.0348297	11.655	9.63468	15.643	28.7467	29.5193	21.4878
VDAG_JR2_Chr1g00640.1-2	1.03705	0.00120227	0.00431998	29.526	32.7579	27.0197	56.2956	54.967	71.8731
VDAG_JR2_Chr1g00640.1-3	0.946659	0.00010281	0.00049263	121.212	151.265	207.625	292.258	281.961	342.323
VDAG_JR2_Chr1g00640.1-4	0.821548	0.0023505	0.00778259	76.9229	88.6391	133.676	196.436	145.561	180.794
VDAG_JR2_Chr1g00650.1-1	-0.485932	0.115583	0.205675	104.118	73.2236	58.3056	50.3067	52.9312	65.9454
VDAG_JR2_Chr1g00650.1-2	-0.399675	0.296217	0.42879	65.2679	42.3926	44.0848	20.3622	49.8775	44.4576
VDAG_JR2_Chr1g00660.1-1	0.121583	0.873397	0.918071	55.9439	172.461	405.295	174.876	248.37	264.523
VDAG_JR2_Chr1g00660.1-2	-0.106195	0.822429	0.883086	12.432	19.2694	31.286	21.56	15.2686	20.0059
VDAG_JR2_Chr1g00670.1-1	0.958757	1.84229e-07	1.54054e-06	178.71	201.365	200.515	382.092	368.483	375.667
VDAG_JR2_Chr1g00670.1-2	1.08396	7.80602e-10	9.41435e-09	588.188	559.775	678.336	1382.24	1328.37	1157.38
VDAG_JR2_Chr1g00670.1-3	0.95583	3.62276e-06	2.38452e-05	418.802	370.935	527.595	889.95	929.35	731.327
VDAG_JR2_Chr1g00680.1-1	0.998794	4.58689e-05	0.000238021	174.048	152.228	257.398	443.178	378.662	338.619
VDAG_JR2_Chr1g00680.1-2	0.834673	0.00173913	0.00597736	51.2819	54.9177	78.2149	104.207	109.934	109.662
VDAG_JR2_Chr1g00680.1-3	1.1643	1.47139e-06	1.04454e-05	306.138	337.214	536.128	973.795	864.204	795.791
VDAG_JR2_Chr1g00700.1-1	-2.32779	2.13239e-27	1.31584e-25	1580.42	1700.52	2441.73	361.729	375.608	400.859
VDAG_JR2_Chr1g00710.1-1	-0.788715	0.00174693	0.00599872	120.435	174.388	186.294	89.8335	96.7013	90.3971
VDAG_JR2_Chr1g00730.1-1	0.452037	0.253638	0.380231	102.564	91.5295	318.548	239.556	224.958	231.179
VDAG_JR2_Chr1g00740.1-1	-0.616728	0.00013426	0.000625685	1338.77	1176.39	1154.74	779.754	815.345	799.495
VDAG_JR2_Chr1g00750.1-1	0.591668	0.00191956	0.00652558	191.142	218.707	183.449	291.06	306.39	297.866
VDAG_JR2_Chr1g00760.1-1	-0.764652	6.07575e-05	0.000306615	292.929	286.15	331.347	180.865	173.044	180.794
VDAG_JR2_Chr1g00760.1-2	-0.611768	0.0390559	0.0850113	71.4839	63.5889	55.4615	39.5267	38.6805	46.6805
VDAG_JR2_Chr1g00770.1-1	-0.506094	0.00883795	0.0242341	255.633	258.209	282.996	196.436	171.009	192.65
VDAG_JR2_Chr1g00780.1-1	0.970542	0.00107442	0.00392312	34.9649	32.7579	34.1301	70.669	64.1282	65.2045
VDAG_JR2_Chr1g00780.1-2	0.679531	0.02776	0.0638093	62.9369	51.0638	38.3964	67.0756	103.827	76.3188
VDAG_JR2_Chr1g00780.1-3	0.843771	0.0377335	0.0826702	27.972	19.2694	12.7988	29.9445	42.7521	37.7889
VDAG_JR2_Chr1g00790.1-2	-1.25244	0.0203998	0.0492319	11.655	30.831	25.5976	9.58223	8.14327	10.3734
VDAG_JR2_Chr1g00800.1-1	-0.845971	0.0877762	0.165083	14.763	33.7214	32.708	13.1756	21.3761	10.3734
VDAG_JR2_Chr1g00800.1-2	-1.28449	4.09961e-06	2.67243e-05	92.4629	111.762	102.39	33.5378	42.7521	48.1624
VDAG_JR2_Chr1g00810.1-2	0.0880841	0.874167	0.918564	7.76999	25.0502	14.2209	15.5711	23.4119	11.1144
VDAG_JR2_Chr1g00820.1-1	-0.266892	0.373262	0.509787	68.3759	56.8446	55.4615	40.7245	48.8596	60.0177
VDAG_JR2_Chr1g00820.1-2	-0.0233295	0.887757	0.928835	473.969	506.784	503.419	471.925	502.847	484.588
VDAG_JR2_Chr1g00830.1-1	1.04588	0.0325057	0.0731234	7.76999	13.4886	18.4872	26.3511	18.3223	34.0841
VDAG_JR2_Chr1g00830.1-2	1.23073	0.0196987	0.0477848	9.32399	10.5981	35.5522	55.0979	46.8238	23.7107
VDAG_JR2_Chr1g00830.1-3	1.61019	6.04097e-05	0.000305131	15.54	28.904	58.3056	87.4379	121.131	94.8428
VDAG_JR2_Chr1g00840.1-2	0.589306	0.0829478	0.157459	4486.39	14965.6	8233.9	14418.9	14733.2	12501.5
VDAG_JR2_Chr1g00840.1-3	0.548974	0.0938172	0.174357	2346.54	7346.44	4496.65	7659.8	6584.85	6514.52
VDAG_JR2_Chr1g00850.1-1	0.940665	1.82359e-05	0.000103678	345.764	448.976	270.197	651.592	686.07	711.321
VDAG_JR2_Chr1g00850.1-2	0.785862	0.000620613	0.0024239	217.56	232.196	146.475	350.949	307.408	374.926
VDAG_JR2_Chr1g00850.1-3	0.988698	1.30349e-05	7.66936e-05	351.203	420.072	246.021	646.801	641.282	736.514
VDAG_JR2_Chr1g00860.1-1	-0.0305928	0.902804	0.938798	337.217	258.209	217.58	201.227	309.444	286.751
VDAG_JR2_Chr1g00870.1-1	-1.17436	0.00206073	0.00694126	71.4839	146.447	59.7277	29.9445	43.7701	48.9033
VDAG_JR2_Chr1g00870.1-2	-1.92311	0.000638255	0.00248641	20.979	30.831	18.4872	9.58223	6.10745	3.7048
VDAG_JR2_Chr1g00870.1-3	-1.69133	0.000348554	0.0014592	31.857	62.6254	27.0197	8.38446	13.2328	15.5602
VDAG_JR2_Chr1g00870.1-4	-0.910918	0.00724864	0.0204652	51.2819	71.2966	42.6627	29.9445	30.5372	28.1565
VDAG_JR2_Chr1g00870.1-6	0.122653	0.748207	0.82956	27.972	30.831	29.8639	44.3178	30.5372	22.9697
VDAG_JR2_Chr1g00880.1-2	1.6127	0.000210414	0.000933579	9.32399	12.5251	15.643	29.9445	46.8238	34.8251
VDAG_JR2_Chr1g00890.1-1	-0.50321	0.174665	0.285324	38.8499	29.8675	36.9743	23.9556	20.3582	29.6384
VDAG_JR2_Chr1g00900.1-1	0.526584	0.0273578	0.0629994	150.738	107.908	180.605	207.216	211.725	210.433
VDAG_JR2_Chr1g00900.1-2	0.695782	0.0313825	0.0709401	53.6129	35.6483	63.994	58.6912	90.5938	95.5838
VDAG_JR2_Chr1g00900.1-3	0.480527	0.12865	0.224231	38.0729	36.6118	35.5522	55.0979	41.7342	57.0539
VDAG_JR2_Chr1g00920.1-1	0.994965	7.63808e-07	5.71525e-06	124.32	118.507	137.943	246.743	263.638	245.999
VDAG_JR2_Chr1g00940.1-1	-0.951526	0.00495415	0.0147901	41.1809	52.9907	55.4615	25.1534	26.4656	25.1926
VDAG_JR2_Chr1g00950.1-1	-2.60483	3.79503e-26	2.13893e-24	1263.4	1036.69	1908.44	238.358	233.101	220.065
VDAG_JR2_Chr1g00960.1-1	0.573753	0.00417828	0.0127687	171.717	186.913	182.027	276.687	293.158	235.625
VDAG_JR2_Chr1g00960.1-2	0.452744	0.0156502	0.0393362	439.004	463.428	537.55	630.032	742.055	595.732
VDAG_JR2_Chr1g00970.1-1	-0.412764	0.0470048	0.0991448	421.133	345.885	292.95	252.731	264.656	280.824
VDAG_JR2_Chr1g00980.1-1	0.740764	0.00108657	0.0039605	2156.95	1229.39	1602.69	2879.46	2539.68	2920.86
VDAG_JR2_Chr1g00980.1-2	0.851318	0.0001036	0.000496009	1596.73	949.016	1124.87	2226.67	2142.7	2257.7
VDAG_JR2_Chr1g00980.1-3	0.977454	4.25708e-06	2.76164e-05	2993.78	1798.8	2263.97	4615.04	4694.59	4588.76
VDAG_JR2_Chr1g00980.1-4	0.857519	1.88428e-05	0.000106808	2888.1	1857.57	2487.23	4229.36	4446.22	4430.94
VDAG_JR2_Chr1g00980.1-5	0.72312	0.233577	0.357118	10.101	6.74428	8.53253	11.9778	22.394	8.15056
VDAG_JR2_Chr1g00990.1-1	1.12159	0.0244358	0.0573353	11.655	9.63468	31.286	26.3511	30.5372	51.8672
VDAG_JR2_Chr1g01010.1-1	0.386639	0.524926	0.652468	7.76999	10.5981	32.708	31.1423	24.4298	9.63248
VDAG_JR2_Chr1g01020.1-1	-1.85053	0.000679716	0.00262688	30.303	17.3424	22.7534	4.79112	7.12536	7.4096
VDAG_JR2_Chr1g01020.1-2	-1.22806	0.0566237	0.115365	23.31	11.5616	14.2209	9.58223	10.1791	2.22288
VDAG_JR2_Chr1g01030.1-1	-0.0877328	0.692187	0.788805	444.443	352.629	374.009	334.18	309.444	457.172
VDAG_JR2_Chr1g01040.1-1	0.756513	0.00413074	0.0126472	286.713	230.269	146.475	409.641	405.127	314.167
VDAG_JR2_Chr1g01050.1-1	0.284744	0.146181	0.24814	3164.72	2720.83	2211.35	2995.65	3705.19	3167.6
VDAG_JR2_Chr1g01050.1-2	0.0311134	0.879778	0.922795	264.957	210.036	200.515	232.369	237.173	223.77
VDAG_JR2_Chr1g01050.1-3	0.144829	0.550631	0.674768	208.236	181.132	123.722	204.82	187.295	180.053
VDAG_JR2_Chr1g01060.1-1	1.08653	9.13599e-07	6.74972e-06	95.5709	85.7487	82.4812	195.238	196.456	171.903
VDAG_JR2_Chr1g01060.1-3	1.04366	6.84778e-05	0.000341489	56.7209	55.8812	42.6627	116.185	101.791	105.957
VDAG_JR2_Chr1g01070.1-2	4.75116	4.46433e-07	3.50285e-06	0.776999	0.963468	1.42209	27.5489	29.5193	23.7107
VDAG_JR2_Chr1g01080.1-1	2.32297	3.97084e-05	0.000208765	5.43899	11.5616	2.84418	45.5156	38.6805	19.265
VDAG_JR2_Chr1g01080.1-2	3.21657	7.36383e-17	2.04232e-15	5.43899	15.4155	15.643	107.8	120.113	96.3248
VDAG_JR2_Chr1g01090.1-1	-0.299417	0.358994	0.495212	54.3899	45.283	54.0394	28.7467	45.8059	48.9033
VDAG_JR2_Chr1g01100.1-1	0.0926219	0.6609	0.764242	184.926	169.57	169.229	185.656	211.725	163.011
VDAG_JR2_Chr1g01100.1-2	0.00799471	0.985374	0.990551	25.641	27.9406	17.0651	33.5378	15.2686	23.7107
VDAG_JR2_Chr1g01100.1-3	0.0812833	0.688871	0.786206	184.149	159.936	179.183	190.447	171.009	191.909
VDAG_JR2_Chr1g01110.1-1	0.0834694	0.680481	0.779545	301.476	250.502	226.112	298.247	265.674	264.523
VDAG_JR2_Chr1g01110.1-2	0.110922	0.524131	0.651871	761.459	638.779	682.603	746.217	691.16	812.092
VDAG_JR2_Chr1g01120.1-1	0.348104	0.125788	0.220119	289.821	184.986	206.203	285.071	282.978	301.571
VDAG_JR2_Chr1g01120.1-2	0.25281	0.220583	0.34147	1041.18	765.957	735.22	887.555	1019.94	1124.04
VDAG_JR2_Chr1g01120.1-3	-0.0396911	0.860509	0.909077	275.058	206.182	182.027	207.216	208.671	231.92
VDAG_JR2_Chr1g01130.1-1	-0.338414	0.194092	0.308494	233.1	253.392	383.964	232.369	272.799	181.535
VDAG_JR2_Chr1g01130.1-2	0.146584	0.557937	0.680863	133.644	149.338	216.158	168.887	210.707	168.939
VDAG_JR2_Chr1g01140.1-1	-0.0543386	0.801785	0.869355	167.832	153.191	201.937	171.282	152.686	177.089
VDAG_JR2_Chr1g01140.1-2	0.0965779	0.657867	0.762245	194.25	145.484	197.67	197.634	178.134	197.836
VDAG_JR2_Chr1g01140.1-3	-0.139609	0.604267	0.72045	75.3689	72.2601	81.0591	83.8446	59.0387	65.2045
VDAG_JR2_Chr1g01140.1-4	0.0452708	0.81173	0.87617	505.049	386.351	436.581	494.683	449.915	428.275
VDAG_JR2_Chr1g01150.1-2	-0.103159	0.636473	0.745493	238.539	322.762	221.846	228.776	242.262	258.595
VDAG_JR2_Chr1g01150.1-3	-0.0994231	0.621779	0.73388	350.426	486.551	372.587	356.938	379.68	391.968
VDAG_JR2_Chr1g01160.1-1	0.279145	0.188397	0.301886	338.771	229.305	315.704	344.96	377.644	349.733
VDAG_JR2_Chr1g01170.1-1	-3.26642	4.69913e-05	0.000243457	12591.3	1439.42	6601.34	604.879	684.034	855.067
VDAG_JR2_Chr1g01180.1-1	-1.20862	7.52477e-10	9.07997e-09	4316.23	4821.19	5341.37	2522.52	1976.78	1767.19
VDAG_JR2_Chr1g01180.1-2	-1.42503	6.71568e-08	6.08016e-07	183.372	211.963	149.319	71.8668	80.4148	52.6081
VDAG_JR2_Chr1g01180.1-3	-1.14184	9.87739e-10	1.17685e-08	3319.34	3922.28	4532.2	1839.79	1910.61	1584.91
VDAG_JR2_Chr1g01190.1-2	0.950892	7.99138e-05	0.000391404	79.2539	96.3468	65.4161	161.7	146.579	160.788
VDAG_JR2_Chr1g01200.1-1	-0.266855	0.35688	0.492972	73.0379	74.187	109.501	55.0979	80.4148	74.8369
VDAG_JR2_Chr1g01230.1-1	-0.133306	0.646312	0.753361	62.1599	55.8812	49.7731	52.7023	55.985	45.9395
VDAG_JR2_Chr1g01230.1-2	0.284336	0.164197	0.271555	194.25	161.863	186.294	233.567	229.029	199.318
VDAG_JR2_Chr1g01230.1-3	0.372875	0.213078	0.332024	45.8429	36.6118	54.0394	61.0867	54.967	59.2768
VDAG_JR2_Chr1g01240.1-1	-0.0853284	0.710736	0.802507	225.33	158.009	160.696	167.689	163.883	183.017
VDAG_JR2_Chr1g01240.1-2	-0.0571	0.854395	0.905327	53.6129	41.4291	51.1952	38.3289	47.8417	53.3491
VDAG_JR2_Chr1g01250.1-1	0.0761473	0.78348	0.856073	55.9439	63.5889	56.8836	65.8779	66.164	54.831
VDAG_JR2_Chr1g01250.1-2	-0.499104	0.00419047	0.012799	5712.5	7274.18	5866.12	4364.71	4802.49	4173.08
VDAG_JR2_Chr1g01260.1-1	1.09651	5.72014e-05	0.000290601	44.2889	73.2236	59.7277	129.36	133.346	114.849
VDAG_JR2_Chr1g01260.1-3	-0.578729	0.000502109	0.00201215	8939.37	11358.3	9385.79	6547.06	6814.9	6513.04
VDAG_JR2_Chr1g01270.1-1	0.197437	0.675766	0.775905	10.878	19.2694	18.4872	20.3622	15.2686	19.265
VDAG_JR2_Chr1g01270.1-2	0.568485	0.020954	0.0504198	112.665	156.082	174.917	245.545	180.17	228.216
VDAG_JR2_Chr1g01270.1-3	-0.557069	0.00263061	0.00857539	4568.75	6362.74	5743.82	4024.54	3492.44	3815.94
VDAG_JR2_Chr1g01270.1-4	-0.535342	0.0035427	0.0110822	2275.83	3164.99	2831.38	2009.87	1854.63	1842.77
VDAG_JR2_Chr1g01270.1-5	-0.445128	0.0131842	0.0340831	2933.95	3897.23	3924.97	2675.84	2579.38	2643
VDAG_JR2_Chr1g01280.1-2	-1.77644	3.65142e-12	6.00743e-11	146.076	176.315	184.872	57.4934	41.7342	48.9033
VDAG_JR2_Chr1g01290.1-1	0.294934	0.252843	0.379314	161.616	114.653	113.767	125.767	188.313	165.975
VDAG_JR2_Chr1g01290.1-2	0.0804736	0.68257	0.781325	1235.43	842.071	941.423	1060.03	1042.34	1092.17
VDAG_JR2_Chr1g01300.1-1	0.177056	0.586191	0.705362	59.0519	39.5022	34.1301	51.5045	52.9312	48.1624
VDAG_JR2_Chr1g01300.1-2	-0.330129	0.455994	0.590252	35.7419	27.9406	14.2209	17.9667	25.4477	20.0059
VDAG_JR2_Chr1g01300.1-3	-0.119264	0.60174	0.718183	158.508	123.324	145.053	114.987	143.525	134.114
VDAG_JR2_Chr1g01310.1-1	-0.0810494	0.819813	0.881524	624.707	226.415	227.534	328.192	380.698	314.167
VDAG_JR2_Chr1g01320.1-1	0.860947	0.00576152	0.0168473	34.9649	41.4291	28.4418	62.2845	73.2894	57.0539
VDAG_JR2_Chr1g01320.1-2	0.893895	0.156555	0.261706	10.101	11.5616	1.42209	10.78	19.3403	14.8192
VDAG_JR2_Chr1g01330.1-2	1.13027	0.00148924	0.00521453	29.526	30.831	21.3313	74.2623	66.164	42.2347
VDAG_JR2_Chr1g01340.1-2	0.112618	0.820733	0.882083	22.533	36.6118	7.11044	26.3511	23.4119	23.7107
VDAG_JR2_Chr1g01350.1-1	-0.832991	0.000231593	0.00101489	341.879	249.538	254.554	148.525	145.561	180.794
VDAG_JR2_Chr1g01360.1-1	0.304023	0.45523	0.589791	17.871	25.0502	39.8185	25.1534	36.6447	37.048
VDAG_JR2_Chr1g01360.1-2	-0.116145	0.589268	0.707899	153.069	179.205	152.164	149.722	162.865	135.596
VDAG_JR2_Chr1g01360.1-3	0.202297	0.65417	0.759545	17.871	14.452	15.643	20.3622	18.3223	17.0421
VDAG_JR2_Chr1g01370.1-1	-0.285515	0.411134	0.548484	52.0589	81.8948	56.8836	31.1423	61.0745	62.9816
VDAG_JR2_Chr1g01380.1-1	-1.82201	3.62338e-06	2.38452e-05	44.2889	64.5524	51.1952	11.9778	12.2149	20.0059
VDAG_JR2_Chr1g01380.1-2	-1.48146	2.50653e-19	8.75363e-18	1671.32	1854.68	1915.55	703.096	635.175	611.292
VDAG_JR2_Chr1g01390.1-1	-1.71905	3.33299e-15	7.73621e-14	327.893	342.995	440.848	120.976	101.791	114.108
VDAG_JR2_Chr1g01400.1-1	-0.267136	0.651914	0.757699	11.655	10.5981	12.7988	4.79112	14.2507	9.63248
VDAG_JR2_Chr1g01420.1-1	1.31603	0.00362189	0.011302	8.54699	14.452	14.2209	37.1312	24.4298	29.6384
VDAG_JR2_Chr1g01430.1-1	2.55876	1.96045e-24	9.94196e-23	57.4979	50.1003	45.5068	368.916	279.925	263.041
VDAG_JR2_Chr1g01440.1-1	1.30155	0.0019073	0.00649167	12.432	24.0867	14.2209	38.3289	53.9491	33.3432
VDAG_JR2_Chr1g01440.1-2	1.84723	0.000304299	0.00129126	5.43899	9.63468	7.11044	29.9445	27.4835	22.2288
VDAG_JR2_Chr1g01440.1-3	1.703	0.00851775	0.0234862	4.66199	7.70775	4.26627	27.5489	8.14327	19.265
VDAG_JR2_Chr1g01450.1-1	0.261478	0.36765	0.50424	56.7209	42.3926	52.6173	59.889	66.164	56.3129
VDAG_JR2_Chr1g01450.1-2	1.01459e-05	0.999964	0.999964	114.219	116.58	99.5462	108.998	112.988	109.662
VDAG_JR2_Chr1g01450.1-3	0.345122	0.187866	0.301396	104.895	82.8583	112.345	130.558	151.668	99.2886
VDAG_JR2_Chr1g01460.1-1	0.0638921	0.842107	0.897041	52.0589	52.0273	32.708	53.9001	48.8596	42.9757
VDAG_JR2_Chr1g01460.1-2	-0.344006	0.455959	0.590252	20.202	21.1963	19.9092	9.58223	20.3582	17.783
VDAG_JR2_Chr1g01460.1-3	0.389306	0.0173879	0.0429743	663.557	606.985	591.589	833.654	838.756	769.857
VDAG_JR2_Chr1g01460.1-4	-0.0764447	0.764652	0.841931	84.6929	79.9679	73.9486	74.2623	84.4864	68.9092
VDAG_JR2_Chr1g01470.1-1	0.286778	0.150641	0.254062	170.94	192.694	166.384	201.227	226.994	218.583
VDAG_JR2_Chr1g01470.1-2	0.0968386	0.644483	0.752132	134.421	143.557	145.053	155.711	139.453	156.342
VDAG_JR2_Chr1g01480.1-1	-0.124797	0.602863	0.719077	923.075	784.263	1304.06	1104.35	770.557	884.706
VDAG_JR2_Chr1g01480.1-2	-0.110323	0.616967	0.730239	2228.43	1954.88	3263.69	2399.15	2165.09	2330.32
VDAG_JR2_Chr1g01490.1-2	0.674384	0.0612102	0.123145	26.418	25.0502	44.0848	41.9223	44.788	61.4997
VDAG_JR2_Chr1g01500.1-1	0.991658	5.60815e-05	0.000285358	76.9229	65.5158	66.8382	126.965	129.274	160.047
VDAG_JR2_Chr1g01510.1-1	0.208475	0.532759	0.659187	45.8429	39.5022	36.9743	33.5378	59.0387	48.9033
VDAG_JR2_Chr1g01510.1-2	0.0903364	0.776318	0.850785	41.1809	47.2099	38.3964	51.5045	36.6447	47.4214
VDAG_JR2_Chr1g01520.1-2	4.34557	1.38364e-05	8.0887e-05	0	1.92694	1.42209	16.7689	13.2328	31.1203
VDAG_JR2_Chr1g01530.1-1	0.0297068	0.913778	0.945953	78.4769	84.7852	63.994	79.0534	91.6117	63.7225
VDAG_JR2_Chr1g01530.1-2	0.0511534	0.778433	0.852416	284.382	301.566	282.996	324.598	288.068	288.974
VDAG_JR2_Chr1g01540.1-1	0.660314	0.031837	0.0718391	50.5049	39.5022	63.994	95.8223	84.4864	62.2406
VDAG_JR2_Chr1g01540.1-2	1.24853	0.00768056	0.0215165	13.986	13.4886	5.68836	29.9445	25.4477	26.6745
VDAG_JR2_Chr1g01540.1-3	0.331642	0.419187	0.55652	18.648	21.1963	17.0651	25.1534	22.394	24.4517
VDAG_JR2_Chr1g01550.1-1	0.632713	0.00135069	0.00478456	233.1	241.831	312.86	400.058	419.378	396.413
VDAG_JR2_Chr1g01550.1-2	0.270317	0.192436	0.30661	164.724	184.022	174.917	225.183	181.188	224.511
VDAG_JR2_Chr1g01550.1-3	0.360449	0.422396	0.559303	34.1879	21.1963	14.2209	20.3622	28.5014	41.4937
VDAG_JR2_Chr1g01560.1-1	-0.961366	1.02368e-06	7.5094e-06	322.455	317.944	365.477	184.458	152.686	178.571
VDAG_JR2_Chr1g01560.1-2	-1.19304	2.54358e-05	0.000139762	98.6788	110.799	79.637	49.109	38.6805	40.0118
VDAG_JR2_Chr1g01570.1-1	-0.148952	0.491837	0.623004	212.898	160.899	217.58	185.656	180.17	167.457
VDAG_JR2_Chr1g01570.1-2	-0.129553	0.508906	0.638974	305.361	282.296	285.84	235.963	306.39	256.372
VDAG_JR2_Chr1g01580.1-1	0.129225	0.608573	0.723652	108.78	81.8948	98.1241	106.602	89.5759	119.295
VDAG_JR2_Chr1g01580.1-2	0.36185	0.0937648	0.174288	125.097	107.908	115.189	154.514	149.633	144.487
VDAG_JR2_Chr1g01580.1-3	0.587996	0.00445481	0.0134782	407.147	305.419	385.386	467.134	621.942	560.166
VDAG_JR2_Chr1g01610.1-1	-1.62188	1.27314e-13	2.48623e-12	660.449	858.45	668.382	251.534	187.295	271.191
VDAG_JR2_Chr1g01610.1-2	-1.44642	0.011208	0.0297617	16.317	35.6483	24.1755	9.58223	15.2686	3.7048
VDAG_JR2_Chr1g01610.1-3	-1.49878	1.20399e-13	2.35928e-12	2544.67	3554.23	2633.71	1110.34	890.67	1089.21
VDAG_JR2_Chr1g01610.1-4	-1.45994	4.85793e-07	3.78171e-06	170.94	187.876	119.455	56.2956	43.7701	73.355
VDAG_JR2_Chr1g01630.1-1	-0.516649	0.00294414	0.00945797	1454.54	1300.68	1208.78	1008.53	832.649	932.127
VDAG_JR2_Chr1g01630.1-2	-0.559662	0.000559888	0.00221408	909.089	825.692	851.831	618.054	576.136	562.388
VDAG_JR2_Chr1g01630.1-3	-0.370372	0.0126918	0.0330353	8207.44	8077.72	9088.57	6369.79	6699.87	6556.75
VDAG_JR2_Chr1g01640.1-1	0.311234	0.186511	0.299623	187.257	161.863	146.475	252.731	167.955	197.836
VDAG_JR2_Chr1g01640.1-2	0.450506	0.0046438	0.0139682	1368.29	1208.19	1348.14	1891.29	1679.55	1792.38
VDAG_JR2_Chr1g01650.1-1	0.375308	0.0514626	0.106809	268.065	212.926	233.223	307.829	319.623	300.83
VDAG_JR2_Chr1g01660.1-1	-0.223135	0.417411	0.554615	104.118	82.8583	82.4812	70.669	64.1282	95.5838
VDAG_JR2_Chr1g01670.1-1	-0.805424	0.0768913	0.14806	24.087	22.1598	25.5976	14.3734	9.16117	17.0421
VDAG_JR2_Chr1g01680.1-1	0.749336	0.0043657	0.0132631	175.602	285.187	365.477	475.518	438.718	467.546
VDAG_JR2_Chr1g01710.1-1	1.08978	0.0257719	0.0599169	10.101	9.63468	9.95462	21.56	23.4119	18.524
VDAG_JR2_Chr1g01710.1-2	1.518	0.00387349	0.0119722	7.76999	10.5981	9.95462	23.9556	40.7163	16.3011
VDAG_JR2_Chr1g01720.1-2	0.0412336	0.917381	0.948281	22.533	37.5753	56.8836	38.3289	48.8596	31.1203
VDAG_JR2_Chr1g01720.1-3	0.466386	0.167672	0.276138	25.641	40.4657	46.9289	46.7134	57.0029	49.6443
VDAG_JR2_Chr1g01730.1-1	-0.129681	0.68054	0.779551	65.2679	54.9177	39.8185	57.4934	47.8417	43.7166
VDAG_JR2_Chr1g01730.1-2	0.0487461	0.837738	0.893708	521.366	347.812	305.749	397.663	378.662	442.353
VDAG_JR2_Chr1g01740.1-1	-0.289885	0.257623	0.384583	225.33	166.68	311.437	188.051	181.188	203.023
VDAG_JR2_Chr1g01750.1-1	-2.21502	7.06362e-08	6.37996e-07	859.361	184.022	516.218	94.6246	118.077	122.999
VDAG_JR2_Chr1g01760.1-1	0.552469	0.0385675	0.0841537	70.7069	54.9177	54.0394	97.0201	85.5043	83.7284
VDAG_JR2_Chr1g01760.1-2	0.616899	0.165532	0.273207	26.418	27.9406	19.9092	19.1645	34.6089	59.2768
VDAG_JR2_Chr1g01770.1-1	0.0283071	0.873687	0.918333	482.516	433.561	401.029	475.518	425.486	445.317
VDAG_JR2_Chr1g01780.1-2	-0.484651	0.0158424	0.0397237	649.571	506.784	679.759	378.498	474.345	457.172
VDAG_JR2_Chr1g01780.1-3	-0.643147	0.000326931	0.00137805	1362.86	1082.94	1341.03	873.181	750.198	801.718
VDAG_JR2_Chr1g01790.1-1	-1.05031	4.34516e-09	4.73167e-08	2520.58	2113.85	1966.75	1056.44	974.138	1157.38
VDAG_JR2_Chr1g01790.1-2	-1.12596	3.1833e-08	3.01639e-07	912.974	739.944	648.473	352.147	315.552	387.522
VDAG_JR2_Chr1g01790.1-3	-0.853172	8.54078e-05	0.000415542	826.727	689.843	665.538	326.994	379.68	499.407
VDAG_JR2_Chr1g01810.1-1	0.720323	0.0043808	0.0132996	87.8009	70.3332	69.6824	143.734	106.88	127.445
VDAG_JR2_Chr1g01810.1-3	0.267773	0.523367	0.651384	31.08	15.4155	19.9092	23.9556	29.5193	27.4155
VDAG_JR2_Chr1g01810.1-4	0.494385	0.164925	0.272481	41.9579	21.1963	46.9289	47.9112	49.8775	55.572
VDAG_JR2_Chr1g01810.1-5	1.18377	6.10474e-05	0.000307874	45.0659	39.5022	28.4418	91.0312	77.361	92.62
VDAG_JR2_Chr1g01810.1-6	0.187068	0.703321	0.796326	19.425	9.63468	19.9092	23.9556	13.2328	18.524
VDAG_JR2_Chr1g01830.1-1	-0.127735	0.83662	0.893017	9.32399	30.831	8.53253	23.9556	8.14327	13.3373
VDAG_JR2_Chr1g01830.1-2	0.610643	0.193308	0.307633	17.094	21.1963	7.11044	23.9556	21.3761	25.9336
VDAG_JR2_Chr1g01830.1-3	0.0794675	0.809389	0.874569	36.5189	33.7214	34.1301	35.9334	36.6447	37.7889
VDAG_JR2_Chr1g01830.1-4	-0.206359	0.474305	0.607145	153.846	322.762	317.126	215.6	215.797	253.408
VDAG_JR2_Chr1g01840.1-2	-3.62134	2.54524e-06	1.72588e-05	24.087	25.0502	18.4872	0	2.03582	2.96384
VDAG_JR2_Chr1g01850.1-1	-1.58683	5.2563e-05	0.00026926	56.7209	156.082	179.183	44.3178	47.8417	37.7889
VDAG_JR2_Chr1g01850.1-2	-1.50878	0.00205352	0.00691797	20.202	45.283	54.0394	16.7689	17.3044	8.15056
VDAG_JR2_Chr1g01850.1-3	-2.0347	0.0027289	0.00884892	7.76999	25.0502	22.7534	3.59334	6.10745	3.7048
VDAG_JR2_Chr1g01870.1-1	-1.15387	5.62956e-06	3.56168e-05	356.642	299.639	201.937	134.151	116.042	137.078
VDAG_JR2_Chr1g01880.1-1	-1.90633	6.16349e-24	3.03116e-22	5787.09	6250.02	4809.5	1418.17	1341.6	1733.1
VDAG_JR2_Chr1g01880.1-2	-1.68218	1.70561e-22	7.58532e-21	6396.25	7186.51	6810.38	1832.6	2124.37	2394.78
VDAG_JR2_Chr1g01880.1-3	-1.69076	1.40626e-24	7.17951e-23	7315.44	8681.81	8551.02	2382.38	2448.07	2771.19
VDAG_JR2_Chr1g01890.1-1	0.480489	0.222687	0.344095	32.6339	45.283	18.4872	47.9112	57.0029	32.6022
VDAG_JR2_Chr1g01900.1-1	0.551127	0.0427988	0.0917118	119.658	74.187	89.5916	110.196	151.668	154.12
VDAG_JR2_Chr1g01900.1-2	0.84097	0.00322205	0.0102222	138.306	84.7852	81.0591	215.6	141.489	192.65
VDAG_JR2_Chr1g01910.1-1	2.11299	2.61827e-09	2.96164e-08	1452.99	402.73	728.11	3902.37	3431.37	3852.99
VDAG_JR2_Chr1g01910.1-2	2.38106	6.58586e-13	1.17893e-11	2317.01	714.893	1621.18	7599.91	8049.62	8593.65
VDAG_JR2_Chr1g01910.1-3	2.18935	9.04243e-11	1.23439e-09	2315.46	684.062	1464.75	6869.26	6444.38	7053.94
VDAG_JR2_Chr1g01910.1-4	2.44807	1.29528e-12	2.24286e-11	39.6269	13.4886	42.6627	167.689	159.812	189.686
VDAG_JR2_Chr1g01920.1-1	-0.273206	0.250224	0.376402	208.236	163.79	153.586	162.898	119.095	154.861
VDAG_JR2_Chr1g01930.1-1	-1.48963	7.11316e-12	1.12555e-10	342.656	342.995	413.828	112.591	155.74	122.258
VDAG_JR2_Chr1g01940.1-1	-2.2154	1.42813e-13	2.767e-12	336.44	401.766	712.467	95.8223	91.6117	122.999
VDAG_JR2_Chr1g01940.1-2	-2.31438	1.54618e-13	2.97641e-12	1090.91	1282.38	2565.45	281.478	297.229	411.974
VDAG_JR2_Chr1g01940.1-3	-1.79185	3.92423e-10	4.90421e-09	160.062	182.095	292.95	63.4823	62.0924	57.0539
VDAG_JR2_Chr1g01950.1-2	-1.84477	0.000297098	0.00126471	20.202	34.6849	61.1498	7.18668	12.2149	11.8554
VDAG_JR2_Chr1g01960.1-1	-1.265	1.26061e-06	9.0807e-06	2447.55	2641.83	4724.18	1257.67	1314.12	1508.59
VDAG_JR2_Chr1g01960.1-2	-1.59793	1.85207e-10	2.42784e-09	268.842	259.173	385.386	93.4268	86.5222	119.295
VDAG_JR2_Chr1g01960.1-4	-1.27501	1.75826e-06	1.23186e-05	215.229	225.452	324.236	135.349	84.4864	96.3248
VDAG_JR2_Chr1g01970.1-1	-1.34964	7.41031e-10	8.94659e-09	830.612	1292.01	928.624	359.334	404.11	432.72
VDAG_JR2_Chr1g01970.1-2	-1.86075	5.64804e-11	7.95829e-10	199.689	333.36	211.891	79.0534	52.9312	73.355
VDAG_JR2_Chr1g01970.1-3	-1.37564	0.000223242	0.000982455	52.0589	90.566	52.6173	32.34	18.3223	25.1926
VDAG_JR2_Chr1g01970.1-4	-1.33916	1.96444e-07	1.63488e-06	165.501	248.575	183.449	76.6579	68.1999	90.3971
VDAG_JR2_Chr1g01980.1-1	0.153324	0.564661	0.687191	103.341	76.114	95.28	91.0312	88.558	124.481
VDAG_JR2_Chr1g01990.1-2	0.440516	0.42162	0.558669	12.432	12.5251	5.68836	11.9778	14.2507	16.3011
VDAG_JR2_Chr1g02000.1-1	-0.938917	0.00528622	0.0156397	56.7209	90.566	78.2149	25.1534	44.788	45.9395
VDAG_JR2_Chr1g02000.1-2	-0.837721	0.0110867	0.0294877	50.5049	58.7716	42.6627	28.7467	29.5193	27.4155
VDAG_JR2_Chr1g02000.1-3	-0.637813	0.00652609	0.0187162	143.745	155.118	173.495	105.405	114.006	84.4694
VDAG_JR2_Chr1g02000.1-4	-0.422146	0.26429	0.392198	47.3969	32.7579	29.8639	28.7467	33.591	21.4878
VDAG_JR2_Chr1g02000.1-5	-1.02333	0.00621174	0.0179626	43.5119	43.3561	51.1952	20.3622	31.5552	16.3011
VDAG_JR2_Chr1g02010.1-1	-1.31845	3.04354e-10	3.88781e-09	261.849	308.31	261.664	110.196	121.131	102.993
VDAG_JR2_Chr1g02010.1-2	-1.03894	8.89601e-11	1.21659e-09	2207.45	2527.18	2300.94	1085.19	1226.58	1112.18
VDAG_JR2_Chr1g02010.1-4	-1.17317	1.30417e-09	1.53389e-08	595.181	731.272	620.031	329.389	262.62	272.673
VDAG_JR2_Chr1g02020.1-1	-0.0222425	0.919566	0.949686	218.337	164.753	160.696	179.667	188.313	170.421
VDAG_JR2_Chr1g02020.1-2	-0.32794	0.310227	0.443571	58.2749	38.5387	52.6173	38.3289	44.788	36.307
VDAG_JR2_Chr1g02030.1-1	0.768422	0.139887	0.239339	7.76999	8.67121	18.4872	16.7689	22.394	17.783
VDAG_JR2_Chr1g02040.1-1	0.645859	0.00656247	0.0187959	101.787	156.082	116.611	183.26	193.403	208.21
VDAG_JR2_Chr1g02040.1-2	0.353034	0.0729659	0.14187	505.826	578.081	703.934	695.91	842.828	739.478
VDAG_JR2_Chr1g02040.1-4	0.446898	0.0152756	0.0386087	476.3	526.054	639.94	722.261	761.395	749.11
VDAG_JR2_Chr1g02050.1-1	-0.794509	0.0001771	0.000799318	656.564	542.433	473.556	347.356	268.728	349.733
VDAG_JR2_Chr1g02050.1-2	-0.737434	1.05742e-05	6.3445e-05	2309.24	1919.23	2273.92	1249.28	1251.01	1398.19
VDAG_JR2_Chr1g02050.1-3	-0.481742	0.0646579	0.12857	105.672	78.0409	106.657	73.0645	68.1999	66.6864
VDAG_JR2_Chr1g02060.1-1	0.00261713	0.990588	0.99338	2672.1	2577.28	1980.97	2867.48	1831.22	2548.16
VDAG_JR2_Chr1g02070.1-1	0.218339	0.606634	0.72244	24.864	14.452	21.3313	25.1534	20.3582	25.1926
VDAG_JR2_Chr1g02080.1-1	0.596143	0.0143975	0.036744	127.428	124.287	92.4358	141.338	188.313	192.65
VDAG_JR2_Chr1g02090.1-1	0.532116	0.0221418	0.052809	106.449	83.8217	110.923	152.118	133.346	148.933
VDAG_JR2_Chr1g02090.1-2	0.722175	0.00077714	0.00294826	135.198	115.616	155.008	238.358	220.886	208.21
VDAG_JR2_Chr1g02110.1-1	0.177927	0.356295	0.492374	480.185	373.826	396.763	445.574	446.862	523.118
VDAG_JR2_Chr1g02120.1-1	-0.152001	0.685592	0.783838	30.303	26.0136	38.3964	23.9556	25.4477	34.0841
VDAG_JR2_Chr1g02120.1-2	0.112515	0.68914	0.786366	111.888	80.9313	69.6824	116.185	85.5043	85.9513
VDAG_JR2_Chr1g02120.1-3	0.127767	0.485882	0.617523	334.886	279.406	294.372	337.774	330.82	326.022
VDAG_JR2_Chr1g02120.1-4	0.218586	0.254937	0.381626	260.295	242.794	301.483	294.654	304.355	333.432
VDAG_JR2_Chr1g02120.1-5	0.280531	0.270943	0.400089	75.3689	73.2236	61.1498	91.0312	84.4864	81.5056
VDAG_JR2_Chr1g02130.1-1	-0.449776	0.0139725	0.03582	411.032	496.186	474.978	341.367	356.268	314.167
VDAG_JR2_Chr1g02140.1-1	-0.0278134	0.87302	0.917857	519.035	450.903	445.114	444.376	478.417	466.805
VDAG_JR2_Chr1g02140.1-2	0.337308	0.12205	0.214954	128.982	119.47	119.455	137.745	156.758	169.68
VDAG_JR2_Chr1g02140.1-3	-0.80071	0.176874	0.287796	10.101	11.5616	19.9092	9.58223	8.14327	5.92768
VDAG_JR2_Chr1g02150.1-1	0.246597	0.653008	0.758661	9.32399	14.452	8.53253	14.3734	14.2507	10.3734
VDAG_JR2_Chr1g02160.1-1	-1.66043	1.85458e-12	3.16558e-11	297.591	263.027	355.522	97.0201	78.3789	112.626
VDAG_JR2_Chr1g02160.1-2	-1.80074	1.16338e-18	3.87849e-17	463.868	371.899	422.36	132.954	116.042	113.367
VDAG_JR2_Chr1g02160.1-3	-1.616	2.83138e-05	0.000154223	97.9018	85.7487	55.4615	21.56	16.2865	39.2709
VDAG_JR2_Chr1g02160.1-4	-1.52231	1.09746e-14	2.38446e-13	739.703	644.56	783.571	215.6	247.352	288.974
VDAG_JR2_Chr1g02170.1-1	-0.924507	1.86595e-05	0.000105901	277.389	400.803	345.568	185.656	166.937	185.981
VDAG_JR2_Chr1g02170.1-2	-0.716584	0.161008	0.267377	15.54	22.1598	15.643	9.58223	14.2507	8.89152
VDAG_JR2_Chr1g02170.1-3	-0.616519	0.359403	0.495629	13.986	15.4155	4.26627	4.79112	6.10745	11.1144
VDAG_JR2_Chr1g02170.1-4	-0.484363	0.357327	0.493469	17.871	22.1598	11.3767	14.3734	7.12536	15.5602
VDAG_JR2_Chr1g02180.1-1	0.499702	0.350657	0.486818	13.986	8.67121	8.53253	15.5711	12.2149	17.0421
VDAG_JR2_Chr1g02190.1-1	0.113218	0.693466	0.789621	76.9229	52.0273	69.6824	58.6912	78.3789	77.0598
VDAG_JR2_Chr1g02190.1-2	0.437842	0.0303065	0.0688015	287.49	213.89	230.378	330.587	314.534	348.251
VDAG_JR2_Chr1g02200.1-1	0.846337	0.000522113	0.00208282	71.4839	63.5889	78.2149	112.591	137.418	131.15
VDAG_JR2_Chr1g02200.1-2	0.625552	0.000228924	0.00100478	509.711	505.821	544.66	862.401	819.416	725.4
VDAG_JR2_Chr1g02210.1-1	-0.390771	0.0330064	0.0740814	387.722	441.268	479.244	323.4	350.16	322.317
VDAG_JR2_Chr1g02210.1-2	-0.439604	0.0127316	0.0331198	503.495	520.273	520.485	347.356	422.432	368.257
VDAG_JR2_Chr1g02210.1-3	-0.403844	0.0734353	0.142551	132.867	144.52	145.053	120.976	95.6834	102.993
VDAG_JR2_Chr1g02220.1-1	0.692432	0.029245	0.0667244	31.857	28.904	36.9743	53.9001	47.8417	54.831
VDAG_JR2_Chr1g02220.1-2	1.12888	0.0302055	0.0686368	8.54699	7.70775	9.95462	16.7689	17.3044	22.2288
VDAG_JR2_Chr1g02220.1-3	0.952559	0.10625	0.192652	8.54699	8.67121	5.68836	21.56	9.16117	14.8192
VDAG_JR2_Chr1g02220.1-4	2.05584	0.000785744	0.00297496	4.66199	4.81734	4.26627	14.3734	24.4298	18.524
VDAG_JR2_Chr1g02220.1-5	0.910811	0.00619064	0.0179157	30.303	23.1232	27.0197	51.5045	53.9491	46.6805
VDAG_JR2_Chr1g02230.1-1	1.26879	0.000413412	0.00169306	18.648	24.0867	22.7534	53.9001	40.7163	61.4997
VDAG_JR2_Chr1g02240.1-2	0.121457	0.488837	0.620152	313.908	335.287	329.925	373.707	353.214	338.619
VDAG_JR2_Chr1g02250.1-1	1.04501	9.72889e-06	5.87604e-05	81.5849	76.114	63.994	147.327	167.955	145.969
VDAG_JR2_Chr1g02260.1-1	0.265071	0.452518	0.587314	31.08	37.5753	35.5522	28.7467	42.7521	51.8672
VDAG_JR2_Chr1g02270.1-1	0.807365	0.00348645	0.0109423	73.0379	55.8812	44.0848	104.207	107.898	95.5838
VDAG_JR2_Chr1g02270.1-2	0.0989643	0.653905	0.759393	211.344	159.936	223.268	235.963	206.635	194.131
VDAG_JR2_Chr1g02280.1-1	0.301238	0.0750027	0.145025	860.138	789.08	698.246	947.443	1009.76	939.537
VDAG_JR2_Chr1g02280.1-2	0.513135	0.0175691	0.0433704	280.497	263.99	190.56	326.994	387.823	339.36
VDAG_JR2_Chr1g02290.1-1	0.485044	0.0277963	0.0638734	163.947	136.812	176.339	214.403	195.438	254.89
VDAG_JR2_Chr1g02300.1-1	-0.0186083	0.937322	0.960998	132.867	120.434	116.611	110.196	146.579	109.662
VDAG_JR2_Chr1g02310.1-1	-0.216632	0.317344	0.451337	172.494	160.899	145.053	123.371	150.65	138.559
VDAG_JR2_Chr1g02310.1-2	-0.293106	0.072815	0.141649	926.96	928.783	904.449	715.074	825.524	712.803
VDAG_JR2_Chr1g02310.1-3	-0.351793	0.182734	0.294803	80.8079	105.981	81.0591	62.2845	76.3431	71.1321
VDAG_JR2_Chr1g02310.1-4	-0.140702	0.425306	0.562317	835.274	848.815	766.506	665.965	842.828	715.026
VDAG_JR2_Chr1g02320.1-1	-1.11033	0.00260822	0.00851703	51.2819	73.2236	71.1044	19.1645	25.4477	43.7166
VDAG_JR2_Chr1g02320.1-2	-0.990007	0.000174228	0.00078823	124.32	202.328	170.651	92.229	73.2894	84.4694
VDAG_JR2_Chr1g02320.1-3	-1.17028	7.28823e-05	0.000360846	73.8149	96.3468	83.9032	39.5267	30.5372	42.2347
VDAG_JR2_Chr1g02320.1-4	-0.912331	0.000893761	0.00333458	82.3619	89.6025	103.812	40.7245	53.9491	50.3853
VDAG_JR2_Chr1g02330.1-1	-0.901226	0.000464361	0.00187808	170.94	128.141	113.767	69.4712	76.3431	76.3188
VDAG_JR2_Chr1g02330.1-2	-0.641116	0.00328667	0.0103883	484.07	377.68	334.191	227.578	289.086	251.926
VDAG_JR2_Chr1g02330.1-3	-0.647874	0.00704301	0.0199539	622.376	498.113	342.723	304.236	328.784	303.793
VDAG_JR2_Chr1g02340.1-2	-1.50058	0.0037744	0.01172	34.1879	26.9771	15.643	5.9889	9.16117	11.8554
VDAG_JR2_Chr1g02340.1-3	-2.25106	1.31315e-06	9.40858e-06	45.8429	45.283	31.286	8.38446	5.08954	11.8554
VDAG_JR2_Chr1g02350.1-1	0.26164	0.177617	0.28853	206.682	217.744	224.69	264.709	280.943	232.661
VDAG_JR2_Chr1g02350.1-2	-0.122757	0.841499	0.89667	13.986	10.5981	8.53253	17.9667	7.12536	6.66864
VDAG_JR2_Chr1g02360.1-1	0.334502	0.528443	0.655515	9.32399	13.4886	9.95462	15.5711	14.2507	11.8554
VDAG_JR2_Chr1g02360.1-3	0.259452	0.27295	0.402217	94.7939	122.36	91.0137	126.965	123.167	120.035
VDAG_JR2_Chr1g02360.1-4	0.178654	0.680495	0.779545	18.648	18.3059	21.3313	27.5489	15.2686	22.9697
VDAG_JR2_Chr1g02370.1-1	-0.231563	0.349166	0.485207	108.78	124.287	108.079	118.58	85.5043	88.1742
VDAG_JR2_Chr1g02370.1-2	0.150511	0.463178	0.596829	220.668	220.634	174.917	221.589	216.814	247.481
VDAG_JR2_Chr1g02370.1-3	-0.158478	0.723218	0.811896	26.418	23.1232	12.7988	16.7689	19.3403	20.7469
VDAG_JR2_Chr1g02380.1-1	-0.840834	4.97657e-05	0.000256082	291.375	359.374	314.282	206.018	158.794	174.866
VDAG_JR2_Chr1g02380.1-2	-0.626444	0.00111337	0.00404387	1738.15	2261.26	2501.45	1497.22	1331.42	1380.41
VDAG_JR2_Chr1g02390.1-1	-1.12954	2.51194e-10	3.23695e-09	2482.51	2893.29	2881.15	1270.84	1087.13	1413.75
VDAG_JR2_Chr1g02390.1-2	-1.27605	1.95338e-09	2.24639e-08	376.067	350.702	334.191	167.689	117.059	154.12
VDAG_JR2_Chr1g02400.1-1	-0.929264	0.000503919	0.00201869	277.389	216.78	150.741	104.207	128.256	108.18
VDAG_JR2_Chr1g02400.1-2	-1.0982	0.0735768	0.142728	35.7419	25.0502	5.68836	8.38446	8.14327	14.8192
VDAG_JR2_Chr1g02410.1-1	-0.623744	0.000691184	0.00266434	509.711	546.286	567.414	336.576	399.02	317.872
VDAG_JR2_Chr1g02410.1-2	-0.672356	0.0349028	0.0775354	66.8219	74.187	46.9289	34.7356	36.6447	46.6805
VDAG_JR2_Chr1g02410.1-3	-0.551345	0.00411601	0.0126054	513.596	492.332	526.173	292.258	402.074	349.733
VDAG_JR2_Chr1g02410.1-4	-0.568279	0.011181	0.0297039	214.452	227.378	233.223	147.327	184.241	124.481
VDAG_JR2_Chr1g02420.1-1	0.659609	0.0726854	0.141421	29.526	29.8675	21.3313	55.0979	31.5552	42.9757
VDAG_JR2_Chr1g02420.1-2	0.793729	0.131294	0.227672	11.655	7.70775	12.7988	26.3511	13.2328	16.3011
VDAG_JR2_Chr1g02420.1-3	0.751515	0.000108264	0.000515617	197.358	240.867	251.71	397.663	399.02	361.588
VDAG_JR2_Chr1g02420.1-5	0.867647	0.0015773	0.0054782	47.3969	73.2236	56.8836	122.173	101.791	100.03
VDAG_JR2_Chr1g02420.1-6	1.11432	0.0759179	0.146556	11.655	7.70775	4.26627	29.9445	15.2686	8.89152
VDAG_JR2_Chr1g02420.1-8	0.871341	0.00250797	0.00823571	43.5119	43.3561	44.0848	71.8668	96.7013	71.1321
VDAG_JR2_Chr1g02430.1-1	-0.534004	0.327243	0.461954	27.972	34.6849	8.53253	8.38446	20.3582	20.7469
VDAG_JR2_Chr1g02430.1-2	-0.309604	0.275181	0.404825	60.6059	63.5889	71.1044	44.3178	52.9312	58.5358
VDAG_JR2_Chr1g02440.1-1	0.0220909	0.90084	0.93746	342.656	392.132	348.412	358.136	382.734	359.365
VDAG_JR2_Chr1g02440.1-2	0.112422	0.640364	0.748646	161.616	115.616	153.586	136.547	182.206	146.71
VDAG_JR2_Chr1g02450.1-1	-0.229336	0.168715	0.277495	698.522	664.793	729.532	547.385	605.655	629.816
VDAG_JR2_Chr1g02460.1-1	-1.91063	7.20085e-06	4.46645e-05	140.637	56.8446	143.631	23.9556	47.8417	19.265
VDAG_JR2_Chr1g02470.1-1	-1.8096	8.82569e-11	1.20842e-09	183.372	127.178	210.469	56.2956	45.8059	46.6805
VDAG_JR2_Chr1g02480.1-2	-1.33971	0.00288138	0.00928647	38.0729	27.9406	72.5265	22.7578	19.3403	12.5963
VDAG_JR2_Chr1g02490.1-1	-0.636861	0.008668	0.0238341	2025.64	3721.88	2337.91	1848.17	1755.89	1596.77
VDAG_JR2_Chr1g02500.1-1	-0.555058	0.154262	0.258713	76.1459	44.3195	32.708	25.1534	40.7163	39.2709
VDAG_JR2_Chr1g02500.1-2	-0.534968	0.0518177	0.10737	112.665	101.164	78.2149	68.2734	79.3968	56.3129
VDAG_JR2_Chr1g02510.1-1	0.292726	0.169405	0.278369	168.609	220.634	172.073	245.545	208.671	234.143
VDAG_JR2_Chr1g02510.1-2	0.456821	0.109434	0.19706	46.6199	60.6985	49.7731	68.2734	64.1282	82.2465
VDAG_JR2_Chr1g02510.1-3	0.439354	0.0397234	0.0862034	142.968	164.753	136.521	177.271	220.886	204.505
VDAG_JR2_Chr1g02510.1-4	0.237305	0.298229	0.430689	107.226	134.886	149.319	162.898	148.615	147.451
VDAG_JR2_Chr1g02520.1-1	-0.122668	0.767469	0.844379	24.087	28.904	17.0651	19.1645	24.4298	21.4878
VDAG_JR2_Chr1g02520.1-2	0.752141	0.00111042	0.00403385	111.888	89.6025	83.9032	152.118	167.955	163.752
VDAG_JR2_Chr1g02520.1-3	0.547089	0.00645406	0.018539	275.835	215.817	207.625	349.752	349.143	327.504
VDAG_JR2_Chr1g02520.1-4	0.247911	0.442503	0.578025	46.6199	38.5387	32.708	53.9001	47.8417	40.7528
VDAG_JR2_Chr1g02520.1-5	-0.117084	0.678452	0.778333	80.0309	84.7852	75.3707	95.8223	55.985	71.1321
VDAG_JR2_Chr1g02530.1-1	-0.968132	2.15526e-07	1.78196e-06	507.38	483.661	536.128	229.974	293.158	256.372
VDAG_JR2_Chr1g02530.1-2	-0.916203	0.018645	0.0456453	48.9509	33.7214	38.3964	26.3511	24.4298	14.8192
VDAG_JR2_Chr1g02540.1-1	-0.368333	0.385369	0.521909	20.979	22.1598	24.1755	15.5711	18.3223	17.783
VDAG_JR2_Chr1g02540.1-2	-0.0215059	0.92901	0.955433	120.435	160.899	189.138	138.942	156.758	163.752
VDAG_JR2_Chr1g02550.1-1	-0.634634	0.000394114	0.00162601	1853.14	1988.6	2278.19	1296	1168.56	1473.77
VDAG_JR2_Chr1g02550.1-2	-0.581169	0.00126306	0.00451137	3774.66	4131.35	4985.84	2786.03	2672.01	3155.01
VDAG_JR2_Chr1g02550.1-3	-0.524227	0.00660117	0.0188806	3317.01	3953.11	4906.21	2690.21	2805.36	2966.8
VDAG_JR2_Chr1g02560.1-1	0.294513	0.130134	0.226177	369.074	412.364	510.53	544.99	493.686	540.901
VDAG_JR2_Chr1g02560.1-2	0.466545	0.0254582	0.0593208	292.929	369.972	449.38	495.881	504.882	529.786
VDAG_JR2_Chr1g02570.1-1	-0.0863905	0.717826	0.807913	112.665	99.2372	126.566	99.4157	97.7192	119.295
VDAG_JR2_Chr1g02570.1-2	0.127658	0.578002	0.698647	124.32	157.045	110.923	142.536	141.489	145.969
VDAG_JR2_Chr1g02580.1-1	0.490326	0.0339058	0.0756897	130.536	194.621	147.897	245.545	204.6	214.878
VDAG_JR2_Chr1g02580.1-3	0.174708	0.624321	0.735312	25.641	27.9406	32.708	33.5378	29.5193	33.3432
VDAG_JR2_Chr1g02590.1-1	0.268791	0.475064	0.607742	27.972	20.2328	38.3964	39.5267	32.5731	31.1203
VDAG_JR2_Chr1g02600.1-1	0.483028	0.010717	0.0286081	195.804	196.548	182.027	268.303	254.477	280.824
VDAG_JR2_Chr1g02610.1-1	-0.54781	0.0522291	0.108085	101.01	81.8948	66.8382	55.0979	52.9312	63.7225
VDAG_JR2_Chr1g02610.1-2	0.276321	0.164991	0.272571	213.675	215.817	199.092	223.985	285.014	252.667
VDAG_JR2_Chr1g02620.1-1	0.212825	0.240611	0.36498	1268.84	1248.65	1525.9	1408.59	1768.11	1505.63
VDAG_JR2_Chr1g02620.1-2	0.176536	0.363594	0.500123	2707.84	3202.57	3560.91	3374.14	4196.84	3130.55
VDAG_JR2_Chr1g02630.1-1	0.920786	0.00135886	0.00481052	45.8429	61.662	49.7731	80.2512	122.149	94.8428
VDAG_JR2_Chr1g02630.1-2	0.581782	0.185308	0.298047	20.202	18.3059	9.95462	22.7578	26.4656	25.1926
VDAG_JR2_Chr1g02640.1-1	0.753051	0.000273221	0.00117382	385.391	335.287	305.749	489.892	686.07	557.202
VDAG_JR2_Chr1g02650.1-1	-0.346139	0.0573868	0.116513	866.354	892.172	829.078	668.361	584.279	781.712
VDAG_JR2_Chr1g02650.1-2	-0.396313	0.0287061	0.0656922	1128.2	1417.26	1127.72	868.39	907.974	1013.63
VDAG_JR2_Chr1g02660.1-1	-0.105508	0.801883	0.869388	36.5189	30.831	17.0651	35.9334	20.3582	24.4517
VDAG_JR2_Chr1g02660.1-2	-0.435912	0.0543246	0.11162	178.71	181.132	230.378	122.173	150.65	160.047
VDAG_JR2_Chr1g02660.1-3	-0.785945	0.0174883	0.0432132	61.3829	47.2099	63.994	23.9556	38.6805	36.307
VDAG_JR2_Chr1g02670.1-1	-0.200729	0.330942	0.465876	452.99	685.989	578.79	499.474	476.381	517.19
VDAG_JR2_Chr1g02680.1-1	-0.960205	0.000155761	0.000714192	1902.87	1584.91	3094.47	1210.95	1034.19	1135.89
VDAG_JR2_Chr1g02680.1-2	-1.20405	4.79709e-07	3.73818e-06	1074.59	953.833	1550.08	614.461	427.521	510.521
VDAG_JR2_Chr1g02690.1-1	0.55362	0.00339329	0.0106808	184.149	202.328	217.58	292.258	291.122	300.089
VDAG_JR2_Chr1g02690.1-2	0.646704	0.0228336	0.0541981	45.0659	44.3195	39.8185	63.4823	68.1999	71.1321
VDAG_JR2_Chr1g02690.1-3	0.525365	0.0504954	0.105224	60.6059	70.3332	48.351	89.8335	81.4327	88.9152
VDAG_JR2_Chr1g02690.1-4	0.781342	0.000479114	0.00193121	96.3479	94.4199	125.144	183.26	176.098	179.312
VDAG_JR2_Chr1g02700.1-1	-1.41387	0.0124706	0.0325526	13.209	27.9406	18.4872	8.38446	9.16117	5.18672
VDAG_JR2_Chr1g02700.1-2	-0.285633	0.178196	0.289306	239.316	305.419	240.333	235.963	187.295	221.547
VDAG_JR2_Chr1g02710.1-3	0.539696	0.0818821	0.155926	46.6199	46.2465	32.708	55.0979	55.985	72.614
VDAG_JR2_Chr1g02720.1-1	0.338069	0.363325	0.499843	38.0729	23.1232	24.1755	41.9223	31.5552	36.307
VDAG_JR2_Chr1g02720.1-2	0.715051	0.0230133	0.0545562	39.6269	28.904	32.708	52.7023	58.0208	56.3129
VDAG_JR2_Chr1g02730.1-1	0.469748	0.011702	0.0308395	327.116	262.063	312.86	419.223	432.611	397.895
VDAG_JR2_Chr1g02730.1-2	0.235943	0.369368	0.505804	118.104	75.1505	86.7474	99.4157	116.042	115.59
VDAG_JR2_Chr1g02740.1-1	0.988735	1.80738e-06	1.26239e-05	136.752	156.082	179.183	337.774	310.462	284.529
VDAG_JR2_Chr1g02740.1-2	1.24845	2.01222e-07	1.66976e-06	93.2399	118.507	140.787	275.489	320.641	235.625
VDAG_JR2_Chr1g02740.1-3	0.935445	0.062515	0.125213	8.54699	12.5251	9.95462	22.7578	21.3761	15.5602
VDAG_JR2_Chr1g02740.1-5	0.799464	0.00263823	0.00859898	70.7069	75.1505	115.189	131.756	168.973	147.451
VDAG_JR2_Chr1g02750.1-1	1.06106	4.40542e-05	0.000229231	470.861	290.967	561.725	1021.71	748.163	986.958
VDAG_JR2_Chr1g02750.1-2	1.19362	7.86397e-08	7.05248e-07	982.903	625.291	1039.55	2033.83	1881.09	2136.93
VDAG_JR2_Chr1g02750.1-3	1.13325	8.65253e-07	6.41526e-06	397.823	292.894	501.997	973.795	777.682	858.772
VDAG_JR2_Chr1g02760.1-2	1.40674	0.0212935	0.0511449	5.43899	5.78081	5.68836	10.78	17.3044	16.3011
VDAG_JR2_Chr1g02770.1-1	0.309304	0.0862329	0.162546	1371.4	1679.33	1272.77	1660.12	1786.43	1911.68
VDAG_JR2_Chr1g02770.1-2	0.0729092	0.756135	0.835665	236.985	314.091	196.248	300.643	238.191	250.444
VDAG_JR2_Chr1g02770.1-3	-0.0633324	0.793872	0.863704	183.372	277.479	173.495	216.798	205.617	186.722
VDAG_JR2_Chr1g02770.1-4	0.334221	0.249771	0.3759	72.2609	86.7121	46.9289	81.449	82.4506	97.8067
VDAG_JR2_Chr1g02780.1-1	1.91092	0.000413731	0.00169345	10.878	11.5616	2.84418	38.3289	43.7701	18.524
VDAG_JR2_Chr1g02780.1-2	2.37389	0.000143224	0.000662713	6.21599	7.70775	1.42209	37.1312	34.6089	13.3373
VDAG_JR2_Chr1g02790.1-1	1.4463	0.0022124	0.00737681	7.76999	12.5251	12.7988	26.3511	23.4119	37.7889
VDAG_JR2_Chr1g02800.1-2	-0.83366	8.82344e-05	0.000428014	248.64	252.429	236.067	113.789	156.758	142.264
VDAG_JR2_Chr1g02800.1-3	-0.593005	0.0311304	0.0704682	87.0239	75.1505	69.6824	47.9112	57.0029	49.6443
VDAG_JR2_Chr1g02800.1-4	-1.15253	0.0154181	0.0388869	20.202	40.4657	22.7534	13.1756	10.1791	14.0782
VDAG_JR2_Chr1g02800.1-5	-0.776614	1.20767e-06	8.72143e-06	1114.99	1131.11	1048.08	606.076	679.963	637.225
VDAG_JR2_Chr1g02810.1-1	-0.106392	0.662062	0.765042	235.431	221.598	366.899	231.171	254.477	274.896
VDAG_JR2_Chr1g02820.1-1	0.53703	0.0090927	0.0248459	181.041	171.497	230.378	293.456	281.961	266.745
VDAG_JR2_Chr1g02820.1-2	0.510187	0.0713348	0.139376	46.6199	52.0273	65.4161	70.669	88.558	71.8731
VDAG_JR2_Chr1g02820.1-3	0.344479	0.168527	0.277265	83.9159	75.1505	76.7928	85.0423	101.791	111.885
VDAG_JR2_Chr1g02830.1-1	0.489493	0.00299516	0.00960154	885.779	942.272	1001.15	1424.16	1338.55	1208.51
VDAG_JR2_Chr1g02840.1-1	-0.149873	0.568247	0.690374	89.3549	75.1505	72.5265	70.669	64.1282	79.2827
VDAG_JR2_Chr1g02840.1-2	0.0735328	0.746006	0.827904	141.414	189.803	196.248	196.436	161.847	194.131
VDAG_JR2_Chr1g02850.1-1	-1.39309	3.69161e-09	4.07258e-08	4062.15	3232.44	5726.75	1888.9	1467.82	1600.47
VDAG_JR2_Chr1g02850.1-2	-1.63659	9.28377e-12	1.44492e-10	427.349	343.958	520.485	164.096	111.97	139.3
VDAG_JR2_Chr1g02850.1-3	-1.27626	8.3425e-08	7.44352e-07	593.627	508.711	884.539	274.291	282.978	261.559
VDAG_JR2_Chr1g02860.1-1	-1.43889	1.97738e-07	1.64264e-06	393.938	330.47	490.621	210.809	111.97	126.704
VDAG_JR2_Chr1g02860.1-2	-1.43996	5.01253e-09	5.41438e-08	676.766	470.172	756.551	283.874	188.313	229.697
VDAG_JR2_Chr1g02860.1-3	-2.2983	1.7835e-13	3.39552e-12	6371.39	3820.15	8464.27	1743.97	885.58	1164.05
VDAG_JR2_Chr1g02860.1-4	-1.01888	0.0289196	0.066121	23.31	19.2694	29.8639	14.3734	10.1791	11.1144
VDAG_JR2_Chr1g02870.1-1	-1.886	1.32968e-12	2.29893e-11	2390.83	1575.27	3282.18	723.459	550.688	686.129
VDAG_JR2_Chr1g02870.1-2	-1.62748	2.10626e-08	2.06455e-07	560.216	393.095	910.137	198.831	186.277	216.36
VDAG_JR2_Chr1g02880.1-1	0.114279	0.567325	0.689644	261.849	275.552	354.1	330.587	310.462	320.095
VDAG_JR2_Chr1g02880.1-2	0.429001	0.474298	0.607145	6.21599	11.5616	11.3767	19.1645	7.12536	12.5963
VDAG_JR2_Chr1g02880.1-3	-0.134369	0.706237	0.798937	41.1809	27.9406	39.8185	40.7245	29.5193	29.6384
VDAG_JR2_Chr1g02890.1-1	-0.412958	0.351533	0.487666	18.648	22.1598	21.3313	14.3734	17.3044	14.8192
VDAG_JR2_Chr1g02900.1-1	0.211094	0.267617	0.396205	749.804	675.391	541.816	814.49	750.198	717.99
VDAG_JR2_Chr1g02900.1-2	0.526617	0.0195194	0.0474037	168.609	171.497	122.3	196.436	243.28	229.697
VDAG_JR2_Chr1g02900.1-3	0.448203	0.127515	0.222611	71.4839	70.3332	44.0848	69.4712	87.5401	98.5476
VDAG_JR2_Chr1g02910.1-1	-0.0861538	0.642352	0.750184	1077.7	911.441	823.39	795.325	959.887	896.561
VDAG_JR2_Chr1g02910.1-2	-0.202088	0.577811	0.698489	90.1319	66.4793	32.708	64.6801	48.8596	54.0901
VDAG_JR2_Chr1g02920.1-1	-0.252548	0.320786	0.455067	76.1459	79.9679	79.637	64.6801	66.164	66.6864
VDAG_JR2_Chr1g02920.1-2	-0.239942	0.606858	0.722631	19.425	18.3059	15.643	11.9778	15.2686	17.783
VDAG_JR2_Chr1g02930.1-1	0.226668	0.287986	0.419461	165.501	143.557	179.183	191.645	169.991	207.469
VDAG_JR2_Chr1g02940.1-1	-0.660421	0.0153891	0.0388308	95.5709	138.739	89.5916	68.2734	65.1461	71.8731
VDAG_JR2_Chr1g02950.1-1	0.543494	0.0567144	0.115488	128.205	161.863	280.152	291.06	258.549	274.896
VDAG_JR2_Chr1g02950.1-2	1.11139	0.00108559	0.00395862	77.6999	103.091	226.112	277.885	282.978	308.239
VDAG_JR2_Chr1g02960.1-1	-0.469258	0.0638828	0.127318	94.7939	90.566	105.235	76.6579	60.0566	72.614
VDAG_JR2_Chr1g02960.1-2	-0.412707	0.0322725	0.072685	509.711	600.241	712.467	440.783	469.256	455.69
VDAG_JR2_Chr1g02960.1-3	-0.70944	0.00529716	0.0156685	108.78	94.4199	126.566	73.0645	66.164	62.2406
VDAG_JR2_Chr1g02960.1-4	-0.29625	0.503085	0.633727	28.749	42.3926	15.643	17.9667	23.4119	29.6384
VDAG_JR2_Chr1g02960.1-5	-0.253589	0.530284	0.657155	37.2959	26.0136	22.7534	23.9556	30.5372	19.265
VDAG_JR2_Chr1g02970.1-1	0.147603	0.53804	0.663625	185.703	177.278	116.611	185.656	184.241	165.975
VDAG_JR2_Chr1g02970.1-2	0.221923	0.278271	0.408604	324.009	283.26	250.288	299.445	382.734	320.836
VDAG_JR2_Chr1g02980.1-1	-1.50449	9.53477e-08	8.38897e-07	234.654	222.561	392.497	100.613	80.4148	116.331
VDAG_JR2_Chr1g02980.1-2	-1.51989	2.17141e-06	1.49782e-05	788.654	825.692	1939.73	383.289	404.11	449.763
VDAG_JR2_Chr1g02990.1-1	-1.31164	3.09541e-05	0.000167139	136.752	85.7487	83.9032	50.3067	34.6089	40.0118
VDAG_JR2_Chr1g02990.1-2	-1.31773	1.27338e-10	1.69859e-09	662.003	466.319	624.297	237.16	237.173	228.957
VDAG_JR2_Chr1g03000.1-1	-1.11175	1.03845e-05	6.24189e-05	296.814	466.319	526.173	226.38	187.295	182.276
VDAG_JR2_Chr1g03000.1-2	-0.740003	0.000521412	0.00208108	563.324	685.989	888.806	440.783	409.199	427.534
VDAG_JR2_Chr1g03010.1-2	-0.365423	0.213476	0.332502	59.0519	66.4793	61.1498	43.1201	42.7521	57.7949
VDAG_JR2_Chr1g03020.1-1	0.332056	0.289849	0.421527	52.0589	46.2465	68.2603	92.229	60.0566	57.0539
VDAG_JR2_Chr1g03050.1-1	-0.44784	0.0390219	0.0849617	250.971	310.237	332.769	256.325	193.403	205.246
VDAG_JR2_Chr1g03060.1-1	-0.180665	0.518978	0.647656	73.8149	76.114	63.994	49.109	67.1819	71.8731
VDAG_JR2_Chr1g03060.1-2	-0.294709	0.457329	0.591467	66.0449	45.283	22.7534	38.3289	41.7342	31.8613
VDAG_JR2_Chr1g03070.1-1	0.47493	0.159723	0.265952	48.1739	29.8675	68.2603	76.6579	59.0387	65.2045
VDAG_JR2_Chr1g03080.1-1	1.34523	4.53668e-09	4.92637e-08	222.222	285.187	342.723	849.226	702.357	601.659
VDAG_JR2_Chr1g03080.1-2	1.32246	3.48859e-07	2.78916e-06	277.389	366.118	567.414	1027.69	1073.89	915.085
VDAG_JR2_Chr1g03090.1-1	0.213189	0.552077	0.675959	29.526	31.7944	31.286	37.1312	26.4656	42.9757
VDAG_JR2_Chr1g03100.1-1	0.217402	0.345243	0.480983	331.778	203.292	295.795	312.62	305.372	347.51
VDAG_JR2_Chr1g03100.1-2	0.23177	0.25104	0.37728	562.547	414.291	531.861	510.254	620.924	638.707
VDAG_JR2_Chr1g03100.1-3	0.0635174	0.901656	0.937953	24.087	14.452	9.95462	14.3734	13.2328	23.7107
VDAG_JR2_Chr1g03100.1-4	0.515353	0.394168	0.530637	13.209	7.70775	4.26627	13.1756	10.1791	14.0782
VDAG_JR2_Chr1g03120.1-1	1.27282	4.37848e-07	3.44261e-06	56.7209	52.0273	62.5719	117.382	147.597	145.969
VDAG_JR2_Chr1g03120.1-3	1.36502	0.00729258	0.0205637	8.54699	17.3424	4.26627	26.3511	28.5014	25.1926
VDAG_JR2_Chr1g03130.1-1	1.47637	4.02844e-09	4.40998e-08	114.219	158.972	173.495	413.234	501.829	322.317
VDAG_JR2_Chr1g03130.1-2	1.29911	1.36889e-07	1.17003e-06	121.989	174.388	200.515	382.092	484.524	348.992
VDAG_JR2_Chr1g03140.1-1	2.25426	2.91226e-19	1.01395e-17	133.644	248.575	228.956	994.157	1062.7	847.658
VDAG_JR2_Chr1g03140.1-2	2.27989	1.49555e-08	1.4995e-07	7.76999	15.4155	11.3767	55.0979	54.967	55.572
VDAG_JR2_Chr1g03150.1-1	0.572701	0.00216705	0.00724684	317.016	401.766	398.185	556.967	520.151	580.171
VDAG_JR2_Chr1g03160.1-1	0.0439753	0.917755	0.948497	23.31	19.2694	24.1755	16.7689	20.3582	30.3793
VDAG_JR2_Chr1g03160.1-2	0.26548	0.422172	0.559148	38.8499	41.4291	75.3707	64.6801	54.967	63.7225
VDAG_JR2_Chr1g03170.1-1	0.981692	0.00949335	0.0258233	28.749	14.452	39.8185	50.3067	53.9491	56.3129
VDAG_JR2_Chr1g03170.1-2	0.512464	0.107534	0.194422	53.6129	53.9542	109.501	112.591	96.7013	95.5838
VDAG_JR2_Chr1g03170.1-3	0.444384	0.219387	0.339895	66.0449	72.2601	176.339	161.7	112.988	148.192
VDAG_JR2_Chr1g03170.1-5	0.643837	0.0431515	0.0923025	73.0379	73.2236	162.118	150.92	164.901	159.306
VDAG_JR2_Chr1g03170.1-6	0.848021	0.00116171	0.0041941	109.557	107.908	187.716	263.511	236.155	223.029
VDAG_JR2_Chr1g03170.1-7	1.0597	0.00796114	0.0221554	22.533	19.2694	54.0394	64.6801	52.9312	75.5779
VDAG_JR2_Chr1g03180.1-1	-0.723249	0.00190033	0.00647278	294.483	316.981	203.359	156.909	157.776	180.053
VDAG_JR2_Chr1g03180.1-2	-1.00212	1.52646e-06	1.07943e-05	275.835	300.602	243.177	123.371	150.65	135.596
VDAG_JR2_Chr1g03190.1-1	-0.0372171	0.947773	0.967568	13.986	9.63468	8.53253	10.78	9.16117	11.8554
VDAG_JR2_Chr1g03190.1-2	-0.0621755	0.749306	0.830536	299.145	255.319	255.976	275.489	234.119	268.227
VDAG_JR2_Chr1g03190.1-4	-0.825447	0.188273	0.301793	21.756	18.3059	4.26627	8.38446	10.1791	7.4096
VDAG_JR2_Chr1g03190.1-5	-0.0192487	0.936006	0.960237	142.968	129.105	125.144	114.987	161.847	116.331
VDAG_JR2_Chr1g03200.1-1	-2.21319	6.96361e-08	6.29962e-07	59.0519	145.484	75.3707	26.3511	19.3403	15.5602
VDAG_JR2_Chr1g03200.1-2	-1.86982	4.28643e-12	7.00661e-11	248.64	391.168	268.775	73.0645	70.2357	103.734
VDAG_JR2_Chr1g03200.1-4	-1.96283	1.76418e-17	5.2579e-16	1508.93	2635.09	2221.3	546.187	498.775	586.84
VDAG_JR2_Chr1g03210.1-1	0.0807633	0.729756	0.816457	125.874	103.091	137.943	136.547	136.4	114.849
VDAG_JR2_Chr1g03210.1-4	0.134648	0.459601	0.59353	376.067	360.337	391.074	451.563	421.414	366.034
VDAG_JR2_Chr1g03210.1-5	0.0531572	0.837425	0.893416	95.5709	84.7852	68.2603	97.0201	82.4506	81.5056
VDAG_JR2_Chr1g03210.1-6	-0.0661817	0.816807	0.879621	102.564	65.5158	73.9486	92.229	70.2357	71.1321
VDAG_JR2_Chr1g03210.1-7	0.240172	0.177482	0.288395	375.29	336.25	399.607	412.036	455.005	443.094
VDAG_JR2_Chr1g03240.1-1	0.235593	0.585801	0.70508	16.317	16.379	28.4418	19.1645	25.4477	25.1926
VDAG_JR2_Chr1g03250.1-1	0.229591	0.272743	0.402017	1177.93	1514.57	1894.22	1679.29	1863.79	1828.69
VDAG_JR2_Chr1g03250.1-2	-0.0190923	0.932913	0.958189	249.417	294.821	392.497	343.763	293.158	284.529
VDAG_JR2_Chr1g03250.1-3	0.0673539	0.794204	0.863901	193.473	250.502	351.256	324.598	265.674	240.071
VDAG_JR2_Chr1g03270.1-1	-0.0239089	0.922127	0.951245	286.713	237.013	162.118	241.951	211.725	225.252
VDAG_JR2_Chr1g03270.1-3	0.319837	0.612173	0.72638	13.209	9.63468	2.84418	9.58223	11.197	12.5963
VDAG_JR2_Chr1g03280.1-1	-0.0227569	0.914065	0.946108	456.098	319.871	346.99	330.587	381.716	394.191
VDAG_JR2_Chr1g03280.1-2	-0.0642011	0.792385	0.862924	185.703	120.434	159.274	135.349	142.507	166.716
VDAG_JR2_Chr1g03280.1-3	-0.307968	0.188744	0.302273	421.133	296.748	261.664	252.731	246.334	294.161
VDAG_JR2_Chr1g03290.1-1	-0.734246	0.000123007	0.000578811	871.793	1192.77	907.293	614.461	573.082	599.436
VDAG_JR2_Chr1g03290.1-2	-0.780133	5.33764e-05	0.000272813	5264.94	7857.08	7029.39	3915.54	3843.62	3973.77
VDAG_JR2_Chr1g03290.1-3	-0.798746	9.59056e-06	5.80173e-05	3164.72	4275.87	3789.87	2224.28	1980.85	2249.55
VDAG_JR2_Chr1g03300.1-1	0.222514	0.196275	0.311095	462.314	436.451	516.218	544.99	574.1	529.786
VDAG_JR2_Chr1g03300.1-2	0.226386	0.201473	0.317477	507.38	501.967	588.745	653.988	650.443	563.87
VDAG_JR2_Chr1g03300.1-3	0.255756	0.181403	0.293175	352.757	369.972	440.848	518.638	433.629	434.943
VDAG_JR2_Chr1g03310.1-1	0.372406	0.0708174	0.138515	152.292	130.068	152.164	189.249	192.385	180.794
VDAG_JR2_Chr1g03310.1-2	0.810813	1.08263e-05	6.48384e-05	282.828	288.077	322.814	495.881	582.244	486.81
VDAG_JR2_Chr1g03320.1-1	0.0341762	0.825809	0.885546	1796.42	1616.7	1838.76	1862.55	1789.48	1725.7
VDAG_JR2_Chr1g03320.1-2	-0.120864	0.605738	0.721562	182.595	151.265	139.365	168.887	122.149	146.71
VDAG_JR2_Chr1g03330.1-1	-0.771522	4.58414e-06	2.95362e-05	1621.6	1545.4	1447.69	997.75	896.777	812.092
VDAG_JR2_Chr1g03330.1-2	-0.595968	0.0243995	0.0572701	103.341	99.2372	83.9032	69.4712	51.9133	68.9092
VDAG_JR2_Chr1g03330.1-3	-0.654148	7.18616e-05	0.000356275	879.563	883.5	863.208	516.243	545.599	605.364
VDAG_JR2_Chr1g03340.1-1	0.0869737	0.765983	0.843151	64.4909	61.662	58.3056	74.2623	47.8417	74.096
VDAG_JR2_Chr1g03340.1-2	0.322181	0.120873	0.213207	393.161	268.808	331.347	427.607	382.734	432.72
VDAG_JR2_Chr1g03350.1-1	-0.644762	0.0858621	0.162099	56.7209	52.9907	32.708	23.9556	25.4477	41.4937
VDAG_JR2_Chr1g03360.1-1	-0.0677516	0.710176	0.802039	974.357	832.437	1067.99	937.861	818.398	983.994
VDAG_JR2_Chr1g03360.1-2	-0.193921	0.305785	0.438982	376.067	316.981	393.919	331.785	292.14	325.281
VDAG_JR2_Chr1g03360.1-3	0.366413	0.154226	0.258671	78.4769	72.2601	92.4358	99.4157	89.5759	121.517
VDAG_JR2_Chr1g03360.1-4	0.163418	0.33199	0.466832	937.061	806.423	1001.15	1004.94	1014.85	1051.42
VDAG_JR2_Chr1g03360.1-5	0.0321908	0.870297	0.916022	3411.02	2866.32	4378.61	3553.81	3683.81	3654.41
VDAG_JR2_Chr1g03370.1-1	0.267794	0.250169	0.376359	106.449	121.397	95.28	117.382	144.543	128.186
VDAG_JR2_Chr1g03370.1-2	0.276638	0.333472	0.468482	47.3969	68.4062	55.4615	65.8779	64.1282	76.3188
VDAG_JR2_Chr1g03380.1-1	-0.0511384	0.831626	0.889479	496.502	298.675	317.126	324.598	372.554	378.63
VDAG_JR2_Chr1g03390.1-1	0.574704	0.036789	0.0809456	498.056	229.305	425.205	558.165	525.241	632.78
VDAG_JR2_Chr1g03390.1-2	0.672002	0.0386968	0.0843905	160.062	58.7716	113.767	172.48	165.919	192.65
VDAG_JR2_Chr1g03390.1-3	0.210905	0.482179	0.614359	417.248	182.095	361.211	367.718	302.319	440.871
VDAG_JR2_Chr1g03390.1-4	0.54606	0.0874988	0.16467	247.863	92.4929	146.475	223.985	232.083	257.113
VDAG_JR2_Chr1g03390.1-5	0.24204	0.354512	0.490601	243.978	129.105	199.092	222.787	206.635	247.481
VDAG_JR2_Chr1g03400.1-1	0.0673869	0.719967	0.809643	244.755	227.378	268.775	262.314	261.602	251.185
VDAG_JR2_Chr1g03400.1-2	-0.0671552	0.763689	0.841155	266.511	220.634	177.761	203.622	201.546	231.92
VDAG_JR2_Chr1g03400.1-3	0.260337	0.142992	0.243634	611.498	542.433	509.108	610.867	724.751	658.713
VDAG_JR2_Chr1g03410.1-1	-0.693162	0.000120497	0.000568526	1261.07	1469.29	1277.04	706.69	879.473	890.634
VDAG_JR2_Chr1g03410.1-2	-0.982769	8.87453e-07	6.56081e-06	229.215	242.794	238.911	122.173	115.024	122.258
VDAG_JR2_Chr1g03410.1-3	-0.768921	0.00118109	0.00425483	264.957	223.525	177.761	125.767	117.059	148.933
VDAG_JR2_Chr1g03410.1-4	-0.901739	0.00403335	0.0123873	202.02	241.831	99.5462	93.4268	105.862	93.3609
VDAG_JR2_Chr1g03420.1-1	1.08819	1.55397e-07	1.31539e-06	112.665	134.886	109.501	241.951	259.567	258.595
VDAG_JR2_Chr1g03430.1-2	-0.463057	0.39117	0.527798	11.655	17.3424	18.4872	5.9889	13.2328	14.0782
VDAG_JR2_Chr1g03430.1-3	0.653879	0.0355181	0.0786184	47.3969	32.7579	36.9743	65.8779	52.9312	66.6864
VDAG_JR2_Chr1g03440.1-1	0.0282251	0.924738	0.952859	54.3899	86.7121	55.4615	61.0867	75.3252	64.4635
VDAG_JR2_Chr1g03440.1-2	0.482529	0.146334	0.248343	27.972	33.7214	34.1301	38.3289	49.8775	44.4576
VDAG_JR2_Chr1g03440.1-3	-0.148123	0.485259	0.617075	141.414	157.045	156.43	132.954	129.274	146.71
VDAG_JR2_Chr1g03440.1-4	0.103512	0.659188	0.763115	162.393	250.502	247.443	215.6	235.137	254.89
VDAG_JR2_Chr1g03450.1-1	-0.0399371	0.862554	0.910329	247.086	400.803	280.152	287.467	316.569	298.607
VDAG_JR2_Chr1g03450.1-2	-0.33764	0.309269	0.442683	62.1599	77.0775	36.9743	50.3067	42.7521	48.1624
VDAG_JR2_Chr1g03460.1-1	0.000778871	0.996825	0.998098	201.243	202.328	197.67	184.458	216.814	200.059
VDAG_JR2_Chr1g03460.1-3	0.0566349	0.856381	0.906593	56.7209	58.7716	59.7277	45.5156	52.9312	81.5056
VDAG_JR2_Chr1g03460.1-4	0.13948	0.586163	0.705362	66.8219	87.6756	78.2149	92.229	82.4506	81.5056
VDAG_JR2_Chr1g03470.1-2	0.286763	0.297373	0.429889	65.2679	64.5524	51.1952	68.2734	85.5043	68.9092
VDAG_JR2_Chr1g03470.1-3	0.341143	0.485085	0.616957	17.871	10.5981	17.0651	27.5489	15.2686	15.5602
VDAG_JR2_Chr1g03470.1-4	0.28499	0.178271	0.289379	238.539	249.538	315.704	377.3	295.193	304.534
VDAG_JR2_Chr1g03470.1-5	-0.0918023	0.843379	0.897916	22.533	27.9406	11.3767	17.9667	16.2865	24.4517
VDAG_JR2_Chr1g03470.1-6	-0.0451794	0.913137	0.94557	19.425	41.4291	27.0197	32.34	21.3761	31.1203
VDAG_JR2_Chr1g03470.1-7	-0.109097	0.702569	0.795935	56.7209	69.3697	63.994	69.4712	58.0208	49.6443
VDAG_JR2_Chr1g03480.1-2	0.473567	0.264501	0.39243	16.317	18.3059	17.0651	28.7467	20.3582	22.9697
VDAG_JR2_Chr1g03480.1-3	0.564124	0.187368	0.300766	12.432	22.1598	18.4872	27.5489	23.4119	26.6745
VDAG_JR2_Chr1g03490.1-1	0.702658	0.111505	0.199974	11.655	15.4155	18.4872	23.9556	27.4835	21.4878
VDAG_JR2_Chr1g03500.1-1	-0.516275	0.0353125	0.0782393	292.929	377.68	523.329	304.236	251.423	276.378
VDAG_JR2_Chr1g03500.1-2	-0.351931	0.0705803	0.138127	3759.12	4591.89	5641.43	3850.86	3540.28	3569.2
VDAG_JR2_Chr1g03500.1-3	-0.482786	0.0246647	0.0577318	504.272	616.62	763.662	506.661	436.683	403.823
VDAG_JR2_Chr1g03510.1-1	-1.59947	2.35205e-06	1.60714e-05	141.414	203.292	372.587	67.0756	82.4506	85.2104
VDAG_JR2_Chr1g03520.1-1	-0.91735	0.00189264	0.00644947	97.1249	91.5295	156.43	65.8779	64.1282	51.8672
VDAG_JR2_Chr1g03520.1-2	-0.632572	0.0430917	0.0922092	115.773	88.6391	187.716	73.0645	100.773	77.0598
VDAG_JR2_Chr1g03540.1-1	0.564278	0.0148662	0.037771	266.511	206.182	167.806	313.818	281.961	355.661
VDAG_JR2_Chr1g03540.1-2	1.09294	0.00238941	0.00789261	52.0589	26.9771	25.5976	58.6912	93.6476	74.8369
VDAG_JR2_Chr1g03540.1-3	0.98787	0.00209806	0.00704093	116.55	45.283	75.3707	160.502	167.955	145.228
VDAG_JR2_Chr1g03550.1-1	1.5211	4.78077e-05	0.00024718	132.09	34.6849	79.637	257.523	203.582	249.703
VDAG_JR2_Chr1g03550.1-2	1.79662	8.75116e-08	7.7807e-07	3682.97	1121.48	2069.14	7925.71	7461.27	8498.81
VDAG_JR2_Chr1g03550.1-3	1.57991	8.13685e-06	4.99262e-05	649.571	190.767	300.061	1249.28	1044.37	1123.29
VDAG_JR2_Chr1g03560.1-1	1.10683	0.03362	0.0751918	10.101	13.4886	4.26627	22.7578	20.3582	19.265
VDAG_JR2_Chr1g03570.1-1	0.42425	0.0601522	0.121371	232.323	379.606	282.996	384.487	421.414	394.191
VDAG_JR2_Chr1g03570.1-2	0.290529	0.338623	0.474022	46.6199	69.3697	48.351	73.0645	53.9491	74.096
VDAG_JR2_Chr1g03580.1-1	0.726281	0.0113019	0.029969	37.2959	48.1734	52.6173	71.8668	81.4327	72.614
VDAG_JR2_Chr1g03590.1-1	-0.19455	0.337248	0.472649	1516.7	2131.19	1510.26	1618.2	1551.29	1340.4
VDAG_JR2_Chr1g03590.1-2	-0.197241	0.384061	0.520664	494.948	651.304	399.607	504.265	443.808	403.823
VDAG_JR2_Chr1g03600.1-1	-0.197536	0.411785	0.549114	160.839	117.543	122.3	104.207	119.095	126.704
VDAG_JR2_Chr1g03610.1-1	0.036025	0.843248	0.897819	362.858	349.739	344.146	319.807	373.572	389.004
VDAG_JR2_Chr1g03610.1-2	-0.132339	0.763626	0.841126	22.533	17.3424	18.4872	17.9667	20.3582	15.5602
VDAG_JR2_Chr1g03630.1-1	0.0785665	0.780921	0.854411	104.895	94.4199	176.339	131.756	116.042	144.487
VDAG_JR2_Chr1g03630.1-2	0.856848	0.0312421	0.0706659	15.54	24.0867	15.643	35.9334	30.5372	34.0841
VDAG_JR2_Chr1g03640.1-1	0.219778	0.370545	0.506854	110.334	125.251	143.631	148.525	117.059	172.644
VDAG_JR2_Chr1g03640.1-2	-0.404476	0.105708	0.191882	114.219	116.58	112.345	107.8	75.3252	77.8008
VDAG_JR2_Chr1g03650.1-1	0.272551	0.174746	0.285369	163.17	157.045	183.449	198.831	194.42	212.655
VDAG_JR2_Chr1g03660.1-1	0.354933	0.136857	0.235329	82.3619	75.1505	88.1695	110.196	102.809	100.771
VDAG_JR2_Chr1g03670.1-1	0.0896937	0.687875	0.785463	176.379	138.739	176.339	160.502	161.847	198.577
VDAG_JR2_Chr1g03670.1-2	-0.137801	0.545599	0.670575	686.867	441.268	452.224	494.683	428.539	515.708
VDAG_JR2_Chr1g03680.1-1	0.112427	0.611283	0.725665	225.33	341.068	267.353	319.807	269.746	311.203
VDAG_JR2_Chr1g03680.1-2	0.206274	0.316366	0.450425	454.544	695.624	547.504	667.163	651.461	639.448
VDAG_JR2_Chr1g03680.1-3	0.318241	0.17167	0.281117	179.487	241.831	243.177	227.578	331.838	266.005
VDAG_JR2_Chr1g03690.1-1	-2.04599	1.23803e-17	3.75367e-16	211.344	219.671	219.002	57.4934	41.7342	57.7949
VDAG_JR2_Chr1g03690.1-2	-2.58312	4.19516e-22	1.8126e-20	181.818	182.095	206.203	25.1534	30.5372	37.7889
VDAG_JR2_Chr1g03690.1-3	-2.18388	2.19898e-35	2.20576e-33	1043.51	1187.96	994.04	243.149	240.226	227.475
VDAG_JR2_Chr1g03690.1-4	-2.04336	2.9747e-05	0.000161387	35.7419	46.2465	27.0197	13.1756	4.07163	9.63248
VDAG_JR2_Chr1g03700.1-1	-1.94025	7.69338e-16	1.91452e-14	216.783	203.292	189.138	63.4823	47.8417	48.9033
VDAG_JR2_Chr1g03700.1-2	-1.36414	1.36434e-17	4.12562e-16	1156.17	1288.16	1200.24	471.925	479.435	464.582
VDAG_JR2_Chr1g03710.1-1	-1.48618	2.19523e-15	5.18521e-14	916.082	728.382	846.143	306.632	265.674	316.39
VDAG_JR2_Chr1g03710.1-2	-1.35667	7.11176e-14	1.42423e-12	1692.3	1284.3	1451.95	540.198	583.261	605.364
VDAG_JR2_Chr1g03720.1-1	-0.219517	0.247472	0.373225	857.807	634.926	655.583	612.065	607.691	627.593
VDAG_JR2_Chr1g03730.1-1	0.165417	0.652417	0.758245	33.4109	24.0867	25.5976	31.1423	28.5014	34.0841
VDAG_JR2_Chr1g03730.1-2	0.22045	0.304491	0.437485	220.668	216.78	160.696	223.985	254.477	222.288
VDAG_JR2_Chr1g03730.1-3	-0.434337	0.151931	0.25569	58.2749	64.5524	51.1952	44.3178	35.6268	48.9033
VDAG_JR2_Chr1g03740.1-1	1.67534	0.00289792	0.00933583	8.54699	5.78081	5.68836	13.1756	25.4477	25.9336
VDAG_JR2_Chr1g03740.1-2	1.15971	0.000787387	0.00298019	30.303	26.0136	18.4872	49.109	67.1819	54.0901
VDAG_JR2_Chr1g03750.1-1	-0.245049	0.311824	0.445296	135.975	105.018	103.812	99.4157	90.5938	102.252
VDAG_JR2_Chr1g03750.1-2	-0.0341036	0.867761	0.91413	270.396	248.575	237.489	208.414	249.388	280.083
VDAG_JR2_Chr1g03780.1-1	-0.755143	0.00119036	0.0042826	401.708	301.566	260.242	178.469	176.098	217.101
VDAG_JR2_Chr1g03790.1-1	-0.0653296	0.855384	0.906158	30.303	67.4428	44.0848	41.9223	47.8417	45.1985
VDAG_JR2_Chr1g03800.1-1	0.205927	0.315344	0.449223	313.131	291.931	419.516	401.256	379.68	396.413
VDAG_JR2_Chr1g03800.1-2	0.02807	0.887681	0.928798	400.931	364.191	487.777	467.134	379.68	428.275
VDAG_JR2_Chr1g03810.1-1	-0.0305525	0.904202	0.939865	145.299	123.324	150.741	177.271	109.934	124.481
VDAG_JR2_Chr1g03820.1-1	-0.422369	0.0602028	0.121462	887.333	559.775	573.102	494.683	509.972	505.334
VDAG_JR2_Chr1g03820.1-2	-1.00252	0.0237452	0.056003	57.4979	34.6849	29.8639	32.34	17.3044	13.3373
VDAG_JR2_Chr1g03830.1-1	0.412684	0.0695284	0.136428	188.811	125.251	162.118	220.391	215.797	199.318
VDAG_JR2_Chr1g03830.1-2	-0.532722	0.294134	0.426356	17.871	13.4886	18.4872	9.58223	10.1791	14.0782
VDAG_JR2_Chr1g03840.1-1	0.491752	0.0873826	0.164479	117.327	66.4793	75.3707	124.569	102.809	139.3
VDAG_JR2_Chr1g03850.1-1	0.394522	0.0199312	0.048239	525.251	531.834	453.646	682.734	664.694	642.412
VDAG_JR2_Chr1g03850.1-2	0.202075	0.317295	0.451297	149.184	162.826	156.43	168.887	185.259	183.758
VDAG_JR2_Chr1g03850.1-3	-0.0888651	0.668816	0.770455	152.292	155.118	146.475	150.92	141.489	135.596
VDAG_JR2_Chr1g03850.1-4	0.0701233	0.7574	0.836656	166.278	155.118	160.696	188.051	186.277	134.114
VDAG_JR2_Chr1g03850.1-6	0.229154	0.219614	0.340154	289.044	334.323	294.372	361.729	387.823	327.504
VDAG_JR2_Chr1g03860.1-1	0.312117	0.275751	0.405322	75.3689	52.9907	66.8382	98.2179	79.3968	66.6864
VDAG_JR2_Chr1g03860.1-2	0.126477	0.64835	0.754837	79.2539	75.1505	68.2603	59.889	87.5401	94.8428
VDAG_JR2_Chr1g03870.1-1	-0.19362	0.461186	0.594767	83.1389	89.6025	119.455	73.0645	93.6476	85.9513
VDAG_JR2_Chr1g03870.1-2	-0.296093	0.314368	0.44817	64.4909	54.9177	86.7474	49.109	58.0208	58.5358
VDAG_JR2_Chr1g03890.1-1	-0.132997	0.756634	0.836062	42.7349	20.2328	22.7534	33.5378	20.3582	25.9336
VDAG_JR2_Chr1g03890.1-2	0.37081	0.181378	0.293156	339.548	156.082	270.197	300.643	352.196	337.878
VDAG_JR2_Chr1g03890.1-3	0.137067	0.573822	0.695255	869.462	488.478	565.991	766.579	623.978	728.363
VDAG_JR2_Chr1g03900.1-1	-0.0334956	0.949724	0.968828	12.432	11.5616	15.643	14.3734	8.14327	15.5602
VDAG_JR2_Chr1g03900.1-2	-0.807822	2.1434e-05	0.000120003	2272.72	3209.31	3085.93	1716.42	1583.87	1593.06
VDAG_JR2_Chr1g03900.1-3	-0.752654	7.382e-05	0.000364617	2390.83	3384.66	2960.79	1788.28	1575.72	1819.8
VDAG_JR2_Chr1g03900.1-4	-1.04542	3.30637e-08	3.12779e-07	2271.94	3143.8	2517.1	1185.8	1260.17	1395.97
VDAG_JR2_Chr1g03910.1-1	-0.153604	0.458229	0.592328	260.295	217.744	213.313	195.238	234.119	194.131
VDAG_JR2_Chr1g03910.1-2	0.0493906	0.808766	0.873999	220.668	211	211.891	225.183	251.423	191.168
VDAG_JR2_Chr1g03920.1-3	0.010242	0.965838	0.978646	131.313	114.653	92.4358	114.987	108.916	119.295
VDAG_JR2_Chr1g03920.1-5	0.642696	0.28087	0.411678	6.99299	4.81734	21.3313	16.7689	18.3223	14.0782
VDAG_JR2_Chr1g03920.1-6	-0.01791	0.952921	0.970698	93.2399	62.6254	69.6824	83.8446	87.5401	54.0901
VDAG_JR2_Chr1g03930.1-1	0.193677	0.682691	0.781424	33.4109	17.3424	14.2209	20.3622	36.6447	19.265
VDAG_JR2_Chr1g03930.1-2	-0.251438	0.118272	0.209446	920.744	889.281	816.279	710.283	765.467	732.068
VDAG_JR2_Chr1g03930.1-3	-0.359119	0.122958	0.216197	181.041	144.52	140.787	135.349	125.203	105.957
VDAG_JR2_Chr1g03930.1-4	-0.291504	0.202871	0.319106	159.285	187.876	156.43	122.173	163.883	125.963
VDAG_JR2_Chr1g03950.1-1	-0.475567	0.0099363	0.0268291	383.837	470.172	408.14	288.665	315.552	303.053
VDAG_JR2_Chr1g03950.1-2	-0.583085	0.0082422	0.0228204	218.337	252.429	206.203	134.151	179.152	139.3
VDAG_JR2_Chr1g03960.1-1	-1.64171	3.75163e-09	4.12725e-08	253.302	271.698	174.917	82.6468	52.9312	88.9152
VDAG_JR2_Chr1g03960.1-2	-1.07578	2.70164e-09	3.04536e-08	2400.15	2309.43	1813.16	1037.28	970.067	1088.47
VDAG_JR2_Chr1g03970.1-1	-0.0681608	0.721841	0.81079	628.592	496.186	466.445	485.101	530.33	505.334
VDAG_JR2_Chr1g03970.1-2	-0.360887	0.155789	0.260788	171.717	131.032	105.235	103.009	111.97	105.216
VDAG_JR2_Chr1g03980.1-1	0.135527	0.458905	0.592897	291.375	290.004	287.262	286.269	328.784	337.878
VDAG_JR2_Chr1g03980.1-2	0.0743045	0.726988	0.814682	260.295	220.634	193.404	267.105	214.779	231.92
VDAG_JR2_Chr1g03980.1-3	0.0476063	0.824591	0.884697	136.752	124.287	127.988	125.767	138.436	137.818
VDAG_JR2_Chr1g03990.1-1	-0.43458	0.10774	0.194748	117.327	96.3468	92.4358	57.4934	79.3968	88.9152
VDAG_JR2_Chr1g03990.1-2	0.118709	0.481741	0.61401	394.715	413.328	409.562	420.421	459.077	441.612
VDAG_JR2_Chr1g04020.1-1	0.397082	0.0940015	0.174599	729.602	425.853	465.023	668.361	698.285	770.598
VDAG_JR2_Chr1g04020.1-2	0.417065	0.10348	0.188651	222.222	122.36	160.696	247.94	214.779	214.878
VDAG_JR2_Chr1g04030.1-1	0.816247	0.000146797	0.000676909	167.832	183.059	170.651	353.345	318.605	248.962
VDAG_JR2_Chr1g04040.1-1	0.647619	0.083237	0.157929	31.08	18.3059	24.1755	45.5156	35.6268	35.5661
VDAG_JR2_Chr1g04050.1-1	-0.669028	0.000304891	0.00129353	582.749	535.688	466.445	341.367	306.39	350.474
VDAG_JR2_Chr1g04050.1-2	-0.642824	0.000716922	0.00275005	437.45	410.437	375.431	262.314	233.101	288.233
VDAG_JR2_Chr1g04050.1-3	-0.819438	0.000816536	0.00307801	218.337	204.255	139.365	101.811	110.952	107.439
VDAG_JR2_Chr1g04050.1-4	-0.862587	9.86362e-05	0.00047483	198.135	197.511	177.761	118.58	89.5759	108.18
VDAG_JR2_Chr1g04060.1-1	0.316758	0.109243	0.196794	734.264	584.825	565.991	733.041	905.938	712.803
VDAG_JR2_Chr1g04060.1-2	0.271896	0.15645	0.261574	633.254	553.031	469.289	619.252	736.966	646.858
VDAG_JR2_Chr1g04070.1-1	1.48723	1.35504e-08	1.36705e-07	54.3899	52.9907	72.5265	186.854	178.134	135.596
VDAG_JR2_Chr1g04080.1-1	-0.620747	0.161262	0.267732	22.533	26.0136	19.9092	17.9667	12.2149	14.8192
VDAG_JR2_Chr1g04080.1-2	-2.24648	0.000520337	0.00207722	28.749	30.831	11.3767	2.39556	3.05372	8.89152
VDAG_JR2_Chr1g04080.1-3	-1.54285	0.00229253	0.00760836	20.202	25.0502	29.8639	10.78	5.08954	9.63248
VDAG_JR2_Chr1g04080.1-4	-0.922388	6.39824e-07	4.86275e-06	362.858	372.862	419.516	209.611	194.42	204.505
VDAG_JR2_Chr1g04090.1-1	-0.349597	0.343709	0.479402	2859.36	3683.34	9819.52	3935.9	4821.83	4079.72
VDAG_JR2_Chr1g04090.1-2	-0.404328	0.20644	0.323892	376.844	511.602	1031.01	469.53	505.9	471.25
VDAG_JR2_Chr1g04090.1-3	-0.813124	0.0160589	0.0401692	886.556	1226.49	2701.97	892.346	943.601	901.748
VDAG_JR2_Chr1g04090.1-4	-0.562186	0.139027	0.238198	885.002	1145.56	3201.12	1123.52	1281.55	1135.15
VDAG_JR2_Chr1g04100.1-1	-0.363481	0.152013	0.25577	247.863	319.871	446.536	243.149	304.355	237.848
VDAG_JR2_Chr1g04100.1-2	0.0293121	0.934828	0.959555	27.972	32.7579	35.5522	25.1534	37.6626	34.0841
VDAG_JR2_Chr1g04100.1-3	-0.224555	0.46966	0.603032	68.3759	67.4428	123.722	68.2734	84.4864	66.6864
VDAG_JR2_Chr1g04110.1-1	-1.93675	1.98782e-22	8.78887e-21	752.912	1024.17	914.403	222.787	258.549	221.547
VDAG_JR2_Chr1g04120.1-1	0.156146	0.400152	0.537169	448.328	344.922	409.562	447.969	456.023	437.166
VDAG_JR2_Chr1g04130.1-1	0.36147	0.111653	0.200185	136.752	144.52	163.54	160.502	226.994	181.535
VDAG_JR2_Chr1g04130.1-2	0.239775	0.316029	0.450058	260.295	160.899	173.495	232.369	235.137	237.848
VDAG_JR2_Chr1g04140.1-1	-0.00799281	0.972808	0.982953	194.25	148.374	137.943	156.909	142.507	180.053
VDAG_JR2_Chr1g04140.1-2	-0.0693689	0.895524	0.934171	27.972	19.2694	11.3767	25.1534	8.14327	23.7107
VDAG_JR2_Chr1g04140.1-3	0.024285	0.88488	0.926591	1678.32	1373.91	1715.04	1587.06	1631.71	1627.89
VDAG_JR2_Chr1g04150.1-2	-0.82195	0.151664	0.255297	10.101	15.4155	24.1755	10.78	11.197	5.92768
VDAG_JR2_Chr1g04150.1-3	0.313182	0.553343	0.676998	11.655	12.5251	11.3767	9.58223	20.3582	14.0782
VDAG_JR2_Chr1g04160.1-2	-0.67723	0.181585	0.293382	15.54	27.9406	41.2406	9.58223	15.2686	25.9336
VDAG_JR2_Chr1g04170.1-1	0.586348	0.291367	0.423094	6.21599	13.4886	9.95462	17.9667	12.2149	14.0782
VDAG_JR2_Chr1g04170.1-6	-0.209583	0.624964	0.735765	17.094	26.9771	41.2406	22.7578	21.3761	27.4155
VDAG_JR2_Chr1g04180.1-1	-0.00368668	0.983173	0.98908	383.837	378.643	409.562	371.312	376.626	418.642
VDAG_JR2_Chr1g04180.1-2	-0.562578	0.0294767	0.0672219	90.9089	82.8583	106.657	67.0756	63.1103	59.2768
VDAG_JR2_Chr1g04200.1-1	-0.56755	0.0693981	0.136259	627.038	237.977	356.944	288.665	262.62	274.896
VDAG_JR2_Chr1g04200.1-2	-0.52778	0.112859	0.201854	736.595	273.625	329.925	286.269	300.283	344.546
VDAG_JR2_Chr1g04210.1-1	0.168871	0.547531	0.67226	115.773	89.6025	61.1498	105.405	102.809	95.5838
VDAG_JR2_Chr1g04210.1-2	0.353106	0.176493	0.287401	92.4629	74.187	69.6824	85.0423	116.042	102.252
VDAG_JR2_Chr1g04210.1-3	0.0247466	0.913979	0.946098	218.337	198.474	153.586	191.645	168.973	221.547
VDAG_JR2_Chr1g04210.1-4	0.227665	0.329957	0.464834	173.271	132.959	123.722	156.909	157.776	190.427
VDAG_JR2_Chr1g04220.1-1	0.0233439	0.926083	0.953604	117.327	84.7852	118.033	116.185	93.6476	114.849
VDAG_JR2_Chr1g04220.1-2	0.151426	0.418495	0.555732	432.788	374.789	459.335	495.881	415.307	494.22
VDAG_JR2_Chr1g04220.1-3	0.108434	0.729638	0.816446	38.8499	52.0273	41.2406	46.7134	53.9491	42.2347
VDAG_JR2_Chr1g04220.1-4	0.405524	0.0263505	0.0610936	268.065	246.648	290.106	365.323	337.946	360.847
VDAG_JR2_Chr1g04230.1-1	-0.341703	0.152344	0.256213	160.062	153.191	200.515	123.371	117.059	161.529
VDAG_JR2_Chr1g04230.1-2	-0.37167	0.069839	0.13688	207.459	230.269	203.359	182.062	147.597	166.716
VDAG_JR2_Chr1g04230.1-3	-0.489897	0.00525877	0.015568	708.623	662.866	723.843	495.881	443.808	550.533
VDAG_JR2_Chr1g04230.1-4	-0.425782	0.0165405	0.0412065	685.313	797.752	689.713	482.705	554.76	578.689
VDAG_JR2_Chr1g04240.1-1	-0.00484609	0.990219	0.993199	20.979	29.8675	35.5522	28.7467	21.3761	34.0841
VDAG_JR2_Chr1g04240.1-2	-0.167947	0.641157	0.749409	33.4109	34.6849	35.5522	32.34	37.6626	22.9697
VDAG_JR2_Chr1g04240.1-3	0.179133	0.46713	0.600663	90.9089	91.5295	89.5916	83.8446	107.898	114.849
VDAG_JR2_Chr1g04240.1-4	0.319899	0.591533	0.709541	6.99299	19.2694	5.68836	11.9778	14.2507	14.0782
VDAG_JR2_Chr1g04250.1-1	-0.492321	0.00452239	0.0136412	833.72	716.82	709.622	577.33	514.044	517.931
VDAG_JR2_Chr1g04250.1-2	-1.49443	0.000174422	0.000788954	143.745	92.4929	322.814	75.4601	52.9312	68.9092
VDAG_JR2_Chr1g04260.1-1	0.0693225	0.873804	0.918414	22.533	33.7214	17.0651	16.7689	34.6089	25.9336
VDAG_JR2_Chr1g04270.1-8	0.107853	0.829618	0.887874	10.878	17.3424	14.2209	13.1756	13.2328	18.524
VDAG_JR2_Chr1g04280.1-1	-3.19126	3.7874e-28	2.49246e-26	201.243	260.136	201.937	16.7689	26.4656	28.1565
VDAG_JR2_Chr1g04280.1-2	-2.71265	8.31905e-48	1.60529e-45	1108	1365.23	1328.23	201.227	175.08	203.023
VDAG_JR2_Chr1g04290.1-1	-0.892187	0.00272071	0.00882612	132.09	87.6756	139.365	70.669	76.3431	47.4214
VDAG_JR2_Chr1g04290.1-2	-0.995026	6.78735e-05	0.000338995	654.233	592.533	1086.48	389.278	399.02	380.112
VDAG_JR2_Chr1g04290.1-3	-1.04142	9.21436e-06	5.59645e-05	250.971	252.429	371.165	136.547	132.328	153.379
VDAG_JR2_Chr1g04300.1-1	-0.299019	0.309683	0.443071	57.4979	74.187	51.1952	50.3067	51.9133	47.4214
VDAG_JR2_Chr1g04310.1-1	-0.157744	0.556285	0.679539	156.177	218.707	120.878	153.316	167.955	125.963
VDAG_JR2_Chr1g04330.1-2	0.410544	0.310051	0.443403	27.195	27.9406	17.0651	23.9556	43.7701	29.6384
VDAG_JR2_Chr1g04330.1-3	0.0424724	0.89441	0.933378	36.5189	56.8446	48.351	40.7245	51.9133	51.8672
VDAG_JR2_Chr1g04330.1-4	0.46417	0.180814	0.292556	50.5049	46.2465	24.1755	69.4712	51.9133	49.6443
VDAG_JR2_Chr1g04330.1-5	0.517165	0.0604902	0.12189	45.0659	61.662	54.0394	75.4601	77.361	76.3188
VDAG_JR2_Chr1g04330.1-6	0.227973	0.568603	0.690732	27.195	29.8675	18.4872	33.5378	35.6268	21.4878
VDAG_JR2_Chr1g04340.1-1	0.542139	0.240262	0.364612	10.101	24.0867	27.0197	34.7356	20.3582	31.8613
VDAG_JR2_Chr1g04350.1-1	-1.01521	2.38888e-05	0.000132122	158.508	231.232	194.826	103.009	86.5222	99.2886
VDAG_JR2_Chr1g04360.1-1	0.446331	0.115959	0.206184	47.3969	61.662	44.0848	73.0645	70.2357	66.6864
VDAG_JR2_Chr1g04370.1-1	0.371263	0.0552166	0.112984	254.079	246.648	267.353	380.894	304.355	308.98
VDAG_JR2_Chr1g04370.1-2	0.396381	0.026334	0.061064	874.124	1002.01	1176.07	1347.5	1365.01	1299.64
VDAG_JR2_Chr1g04370.1-3	0.0977833	0.81966	0.881484	21.756	25.0502	19.9092	34.7356	20.3582	17.783
VDAG_JR2_Chr1g04380.1-1	0.88857	0.0130421	0.0337849	25.641	31.7944	63.994	68.2734	78.3789	71.8731
VDAG_JR2_Chr1g04380.1-2	1.03173	0.00296462	0.00951437	23.31	24.0867	25.5976	61.0867	44.788	43.7166
VDAG_JR2_Chr1g04380.1-3	1.07278	0.025301	0.0590149	8.54699	12.5251	31.286	40.7245	29.5193	34.8251
VDAG_JR2_Chr1g04390.1-2	0.16901	0.60118	0.717672	38.0729	54.9177	41.2406	62.2845	46.8238	42.9757
VDAG_JR2_Chr1g04390.1-3	0.601182	0.0655114	0.129973	30.303	41.4291	56.8836	65.8779	53.9491	71.1321
VDAG_JR2_Chr1g04400.1-1	0.0307877	0.884451	0.926269	192.696	154.155	159.274	184.458	168.973	165.975
VDAG_JR2_Chr1g04410.1-1	0.407812	0.349315	0.48532	27.972	13.4886	18.4872	21.56	26.4656	31.8613
VDAG_JR2_Chr1g04410.1-2	1.54371	4.48301e-12	7.31743e-11	188.034	215.817	130.832	560.561	504.882	503.853
VDAG_JR2_Chr1g04420.1-1	1.26158	6.52982e-08	5.92366e-07	1101.78	928.783	615.765	2243.44	2240.42	1873.15
VDAG_JR2_Chr1g04430.1-1	0.744833	0.000305649	0.0012965	185.703	139.703	159.274	280.28	272.799	261.559
VDAG_JR2_Chr1g04430.1-2	1.96716	1.02246e-06	7.50284e-06	14.763	15.4155	7.11044	50.3067	55.985	45.1985
VDAG_JR2_Chr1g04430.1-3	-0.0666431	0.737364	0.821739	284.382	303.492	374.009	279.083	316.569	318.613
VDAG_JR2_Chr1g04430.1-4	-0.181986	0.477171	0.609547	292.152	206.182	167.806	170.085	224.958	194.872
VDAG_JR2_Chr1g04440.1-1	0.69483	0.10244	0.187068	19.425	12.5251	17.0651	25.1534	24.4298	29.6384
VDAG_JR2_Chr1g04440.1-2	0.365398	0.0433003	0.0925425	787.877	639.743	605.81	892.346	900.849	831.357
VDAG_JR2_Chr1g04440.1-3	0.227702	0.429345	0.565882	82.3619	57.8081	68.2603	89.8335	62.0924	92.62
VDAG_JR2_Chr1g04450.1-1	-0.0909893	0.609596	0.724273	732.71	784.263	856.098	728.25	664.694	831.357
VDAG_JR2_Chr1g04460.1-1	-0.257898	0.232801	0.356098	195.804	236.05	176.339	186.854	157.776	165.975
VDAG_JR2_Chr1g04470.1-1	-1.0041	7.54394e-06	4.65769e-05	426.572	538.579	570.258	285.071	197.474	281.565
VDAG_JR2_Chr1g04480.1-1	0.111971	0.625396	0.736045	135.198	184.022	180.605	160.502	173.044	203.023
VDAG_JR2_Chr1g04480.1-2	0.278138	0.301483	0.434259	71.4839	119.47	81.0591	108.998	108.916	111.885
VDAG_JR2_Chr1g04480.1-3	0.170794	0.483818	0.615755	83.1389	102.128	85.3253	103.009	91.6117	109.662
VDAG_JR2_Chr1g04490.1-1	0.3235	0.139144	0.238309	114.996	151.265	132.254	161.7	169.991	165.975
VDAG_JR2_Chr1g04500.1-1	0.361664	0.0327571	0.0735944	613.829	526.054	601.544	778.557	702.357	756.52
VDAG_JR2_Chr1g04500.1-2	0.415681	0.0817058	0.155646	83.1389	79.0044	78.2149	97.0201	109.934	113.367
VDAG_JR2_Chr1g04510.1-1	0.297695	0.311245	0.444692	75.3689	45.283	58.3056	71.8668	81.4327	68.1683
VDAG_JR2_Chr1g04520.1-1	-0.187912	0.390552	0.527329	209.79	304.456	277.307	239.556	209.689	243.776
VDAG_JR2_Chr1g04520.1-2	-0.0873237	0.834588	0.891307	26.418	34.6849	24.1755	35.9334	15.2686	29.6384
VDAG_JR2_Chr1g04520.1-3	0.0262368	0.910105	0.943417	101.787	127.178	102.39	117.382	111.97	108.921
VDAG_JR2_Chr1g04530.1-1	0.129185	0.550566	0.674725	160.062	157.045	155.008	159.305	154.722	200.8
VDAG_JR2_Chr1g04530.1-2	0.139866	0.630186	0.740229	101.787	90.566	71.1044	113.789	67.1819	111.144
VDAG_JR2_Chr1g04540.1-1	-0.918122	1.1782e-05	6.99548e-05	498.833	606.985	438.003	233.567	285.014	297.866
VDAG_JR2_Chr1g04540.1-2	-0.707428	2.53704e-05	0.000139436	663.557	734.163	678.336	397.663	444.826	428.275
VDAG_JR2_Chr1g04540.1-3	-0.817227	0.0511255	0.106197	29.526	51.0638	29.8639	13.1756	24.4298	24.4517
VDAG_JR2_Chr1g04560.1-1	-1.20976	0.00187154	0.00638236	48.9509	88.6391	51.1952	33.5378	16.2865	31.8613
VDAG_JR2_Chr1g04560.1-2	-0.98682	2.26492e-06	1.55292e-05	2513.59	4038.86	3056.07	1553.52	1646.98	1647.15
VDAG_JR2_Chr1g04560.1-3	-0.968752	1.57494e-06	1.11095e-05	1562.54	2406.74	1918.4	995.355	979.228	1032.9
VDAG_JR2_Chr1g04560.1-4	-1.12305	1.12891e-07	9.80747e-07	801.086	1109.92	757.973	441.981	366.447	417.901
VDAG_JR2_Chr1g04560.1-5	-1.23329	2.0118e-08	1.97792e-07	840.713	1276.6	861.786	457.552	385.787	424.57
VDAG_JR2_Chr1g04560.1-6	-0.966267	5.38766e-06	3.42482e-05	4850.03	7857.08	5945.75	3428.04	2928.52	3190.57
VDAG_JR2_Chr1g04570.1-1	-2.38382	0.00098002	0.00361846	10.101	30.831	12.7988	2.39556	4.07163	3.7048
VDAG_JR2_Chr1g04570.1-2	-2.3494	1.95598e-08	1.93055e-07	39.6269	72.2601	81.0591	10.78	12.2149	14.0782
VDAG_JR2_Chr1g04580.1-1	4.69168	3.00603e-50	6.45729e-48	33.4109	11.5616	15.643	506.661	565.957	554.238
VDAG_JR2_Chr1g04580.1-2	4.66715	2.42216e-54	6.48853e-52	59.8289	22.1598	32.708	879.17	1073.89	1017.34
VDAG_JR2_Chr1g04590.1-1	1.42392	3.20271e-14	6.69043e-13	508.157	580.971	453.646	1531.96	1402.68	1212.21
VDAG_JR2_Chr1g04600.1-1	-2.63817	6.64585e-29	4.57178e-27	2062.93	3506.06	3031.89	542.594	404.11	435.684
VDAG_JR2_Chr1g04610.1-1	0.302176	0.345712	0.481387	56.7209	33.7214	51.1952	52.7023	52.9312	68.1683
VDAG_JR2_Chr1g04610.1-2	-0.289936	0.407129	0.544251	44.2889	36.6118	35.5522	40.7245	29.5193	26.6745
VDAG_JR2_Chr1g04610.1-3	0.540901	0.364793	0.501348	11.655	5.78081	7.11044	11.9778	10.1791	14.0782
VDAG_JR2_Chr1g04610.1-4	-0.0497489	0.781587	0.854668	924.629	1110.88	1247.17	1079.2	1045.39	1043.27
VDAG_JR2_Chr1g04620.1-1	0.288336	0.1118	0.200383	244.755	254.356	236.067	312.62	293.158	293.42
VDAG_JR2_Chr1g04630.1-1	0.916247	0.00112355	0.00407569	145.299	245.684	247.443	377.3	521.169	303.053
VDAG_JR2_Chr1g04630.1-2	0.0359345	0.901308	0.937713	45.8429	56.8446	55.4615	57.4934	53.9491	50.3853
VDAG_JR2_Chr1g04630.1-3	0.231577	0.671702	0.772617	8.54699	8.67121	19.9092	14.3734	14.2507	13.3373
VDAG_JR2_Chr1g04640.1-1	0.346054	0.397071	0.533631	20.202	29.8675	61.1498	50.3067	46.8238	40.7528
VDAG_JR2_Chr1g04640.1-2	0.29679	0.666043	0.768199	7450.64	16907.9	39106	32059.8	27882.5	18016.4
VDAG_JR2_Chr1g04640.1-3	0.210958	0.740634	0.824053	2504.27	5512	11180.5	9467.25	7705.57	5045.19
VDAG_JR2_Chr1g04670.1-1	-5.24818	1.98537e-56	5.79575e-54	2968.91	8261.74	4014.56	132.954	118.077	149.674
VDAG_JR2_Chr1g04680.1-1	-0.214939	0.485221	0.617075	66.0449	71.2966	41.2406	52.7023	48.8596	54.0901
VDAG_JR2_Chr1g04680.1-2	0.13473	0.581611	0.701667	124.32	120.434	149.319	168.887	111.97	150.415
VDAG_JR2_Chr1g04680.1-3	0.481081	0.0148125	0.0376554	382.283	394.058	529.017	638.416	580.208	597.954
VDAG_JR2_Chr1g04690.1-1	-0.0917767	0.599194	0.715939	501.164	484.624	493.465	412.036	476.381	497.925
VDAG_JR2_Chr1g04700.1-1	0.0959573	0.541644	0.666985	801.863	735.126	743.753	814.49	809.237	815.056
VDAG_JR2_Chr1g04700.1-2	-0.00256661	0.992419	0.99491	73.8149	71.2966	71.1044	74.2623	58.0208	82.9875
VDAG_JR2_Chr1g04710.1-1	-1.54335	1.63672e-09	1.89949e-08	922.298	1770.85	1662.42	455.156	495.721	541.642
VDAG_JR2_Chr1g04710.1-2	-1.58295	0.000363952	0.00151502	29.526	84.7852	52.6173	16.7689	23.4119	15.5602
VDAG_JR2_Chr1g04720.1-1	-1.00687	0.000325232	0.00137139	115.773	123.324	130.832	43.1201	59.0387	79.2827
VDAG_JR2_Chr1g04720.1-2	-1.17345	3.26768e-13	6.04919e-12	1386.17	1316.1	1444.84	578.527	601.584	656.49
VDAG_JR2_Chr1g04740.1-1	-0.218599	0.327228	0.461954	439.004	581.935	713.889	499.474	542.545	446.058
VDAG_JR2_Chr1g04740.1-2	-0.263339	0.336255	0.471577	66.8219	105.018	89.5916	70.669	74.3073	71.8731
VDAG_JR2_Chr1g04750.1-1	0.807043	0.0588094	0.118946	10.878	18.3059	24.1755	29.9445	32.5731	28.1565
VDAG_JR2_Chr1g04750.1-2	0.627718	0.0357997	0.0791033	34.1879	40.4657	48.351	63.4823	65.1461	59.2768
VDAG_JR2_Chr1g04760.1-1	0.991468	3.7505e-05	0.000198326	156.954	101.164	126.566	269.5	217.832	279.342
VDAG_JR2_Chr1g04760.1-2	0.794302	0.0160557	0.0401656	90.1319	67.4428	38.3964	103.009	95.6834	145.228
VDAG_JR2_Chr1g04760.1-3	0.626353	0.0119631	0.0314476	75.3689	62.6254	63.994	101.811	99.755	111.144
VDAG_JR2_Chr1g04760.1-4	1.27461	4.36711e-09	4.75331e-08	282.051	192.694	216.158	501.87	541.527	631.298
VDAG_JR2_Chr1g04770.1-1	0.759759	0.0463371	0.0980207	31.08	14.452	28.4418	41.9223	41.7342	41.4937
VDAG_JR2_Chr1g04770.1-2	1.29979	0.0134426	0.0346473	25.641	4.81734	9.95462	31.1423	39.6984	31.8613
VDAG_JR2_Chr1g04770.1-3	0.968857	0.00502256	0.0149592	55.1669	26.0136	29.8639	68.2734	82.4506	70.3912
VDAG_JR2_Chr1g04770.1-4	0.801386	0.0830389	0.157606	55.1669	15.4155	18.4872	56.2956	40.7163	61.4997
VDAG_JR2_Chr1g04780.1-1	0.489749	0.130815	0.227067	598.289	205.219	371.165	486.298	552.724	612.033
VDAG_JR2_Chr1g04790.1-1	0.526038	0.114523	0.204264	265.734	94.4199	145.053	223.985	228.011	277.86
VDAG_JR2_Chr1g04800.1-1	-2.04175	0.000218705	0.000966036	31.08	24.0867	17.0651	4.79112	6.10745	6.66864
VDAG_JR2_Chr1g04800.1-2	-0.454689	0.0241911	0.0568629	236.208	237.977	197.67	158.107	168.973	164.493
VDAG_JR2_Chr1g04820.1-1	-1.08815	0.00150469	0.00525809	794.093	296.748	339.879	186.854	234.119	252.667
VDAG_JR2_Chr1g04830.1-2	-1.08684	0.0127817	0.0332198	92.4629	31.7944	44.0848	21.56	24.4298	33.3432
VDAG_JR2_Chr1g04840.1-1	0.542862	0.0297011	0.0676701	156.954	143.557	113.767	191.645	252.441	163.752
VDAG_JR2_Chr1g04840.1-2	1.28328	1.65261e-06	1.16106e-05	82.3619	94.4199	61.1498	223.985	212.743	148.933
VDAG_JR2_Chr1g04840.1-3	1.13035	2.29803e-07	1.8904e-06	310.8	320.835	273.041	633.625	821.452	529.786
VDAG_JR2_Chr1g04850.1-2	0.462008	0.408798	0.545975	17.871	8.67121	8.53253	14.3734	24.4298	11.1144
VDAG_JR2_Chr1g04850.1-3	0.742323	0.0380216	0.0831562	38.8499	25.0502	28.4418	65.8779	52.9312	38.5299
VDAG_JR2_Chr1g04860.1-3	-0.0493279	0.794198	0.863901	211.344	230.269	216.158	214.403	211.725	209.692
VDAG_JR2_Chr1g04880.1-1	0.206049	0.685284	0.783676	20.202	7.70775	18.4872	21.56	18.3223	14.0782
VDAG_JR2_Chr1g04880.1-2	0.247271	0.356062	0.492111	136.752	163.79	255.976	225.183	242.262	188.945
VDAG_JR2_Chr1g04880.1-3	-0.180839	0.576362	0.697182	45.8429	54.9177	88.1695	61.0867	49.8775	53.3491
VDAG_JR2_Chr1g04880.1-4	-0.0129224	0.96014	0.974954	102.564	111.762	156.43	100.613	135.382	127.445
VDAG_JR2_Chr1g04890.1-1	-0.112788	0.524713	0.652239	365.966	351.666	410.984	342.565	356.268	343.064
VDAG_JR2_Chr1g04890.1-2	0.0973568	0.621221	0.733673	486.401	413.328	376.854	401.256	510.99	455.69
VDAG_JR2_Chr1g04900.1-1	-0.191407	0.253849	0.380398	639.47	640.706	689.713	542.594	555.778	623.888
VDAG_JR2_Chr1g04900.1-2	-0.420165	0.296662	0.429379	33.4109	34.6849	25.5976	14.3734	29.5193	25.9336
VDAG_JR2_Chr1g04900.1-3	-0.324764	0.0604487	0.121828	432.011	437.415	470.711	379.696	344.053	346.028
VDAG_JR2_Chr1g04900.1-4	-0.374727	0.0969429	0.179099	192.696	151.265	194.826	129.36	157.776	128.186
VDAG_JR2_Chr1g04910.1-2	-0.416954	0.0290281	0.0663091	271.95	264.954	254.554	215.6	185.259	193.39
VDAG_JR2_Chr1g04910.1-3	-0.15901	0.430358	0.566696	508.157	568.446	720.999	592.901	513.026	501.63
VDAG_JR2_Chr1g04910.1-4	-0.269645	0.236978	0.360863	239.316	256.283	371.165	228.776	252.441	234.143
VDAG_JR2_Chr1g04910.1-5	-0.218786	0.320191	0.454422	156.954	168.607	201.937	158.107	160.83	133.373
VDAG_JR2_Chr1g04920.1-1	0.903644	3.02446e-05	0.000163708	249.417	242.794	297.217	537.803	551.706	386.04
VDAG_JR2_Chr1g04920.1-2	0.691222	0.0014732	0.00516379	113.442	105.981	129.41	203.622	187.295	171.162
VDAG_JR2_Chr1g04920.1-3	0.651941	0.0135973	0.0349883	94.0169	77.0775	71.1044	148.525	136.4	100.03
VDAG_JR2_Chr1g04940.1-1	-0.362406	0.159515	0.265684	105.672	100.201	130.832	81.449	104.845	74.8369
VDAG_JR2_Chr1g04950.1-1	-1.53169	3.15621e-13	5.85235e-12	5741.24	8984.34	7714.83	2681.83	2803.32	2276.97
VDAG_JR2_Chr1g04950.1-2	1.08018	3.06267e-05	0.000165489	73.8149	104.055	110.923	240.754	162.865	203.023
VDAG_JR2_Chr1g04950.1-3	-1.68298	7.77414e-17	2.14566e-15	1302.25	1777.6	1227.26	459.947	458.059	424.57
VDAG_JR2_Chr1g04950.1-4	-1.69515	3.93493e-13	7.20243e-12	726.494	1195.66	1029.59	323.4	331.838	257.113
VDAG_JR2_Chr1g04960.1-1	-1.22743	7.22007e-08	6.51093e-07	160.839	169.57	160.696	76.6579	67.1819	66.6864
VDAG_JR2_Chr1g04960.1-2	-1.4329	0.000294135	0.00125303	42.7349	33.7214	41.2406	13.1756	16.2865	14.0782
VDAG_JR2_Chr1g04960.1-3	-1.80278	1.27868e-07	1.09787e-06	71.4839	78.0409	89.5916	32.34	15.2686	21.4878
VDAG_JR2_Chr1g04960.1-4	-1.17283	0.0180263	0.0443692	34.9649	33.7214	12.7988	10.78	14.2507	11.8554
VDAG_JR2_Chr1g04970.1-4	0.560427	0.344716	0.480425	32.6339	10.5981	5.68836	14.3734	35.6268	24.4517
VDAG_JR2_Chr1g04980.1-1	0.407874	0.452481	0.587299	10.878	6.74428	17.0651	13.1756	18.3223	13.3373
VDAG_JR2_Chr1g04990.1-1	-0.816842	0.133655	0.230905	20.202	16.379	12.7988	5.9889	9.16117	12.5963
VDAG_JR2_Chr1g05010.1-2	3.23006	0.00388266	0.0119913	4.66199	0	14.2209	75.4601	52.9312	42.9757
VDAG_JR2_Chr1g05010.1-3	2.68242	0.0217174	0.0519787	13.986	3.85387	102.39	298.247	258.549	209.692
VDAG_JR2_Chr1g05020.1-2	2.00412	2.76323e-06	1.86371e-05	13.209	12.5251	11.3767	43.1201	36.6447	68.9092
VDAG_JR2_Chr1g05030.1-2	1.78838	1.1076e-05	6.61422e-05	8.54699	18.3059	22.7534	57.4934	62.0924	45.9395
VDAG_JR2_Chr1g05030.1-3	2.17916	1.0394e-06	7.60998e-06	13.209	6.74428	7.11044	40.7245	40.7163	45.1985
VDAG_JR2_Chr1g05030.1-4	2.18061	1.92548e-12	3.27677e-11	24.864	36.6118	61.1498	168.887	185.259	184.499
VDAG_JR2_Chr1g05030.1-5	1.82692	0.000276042	0.00118438	8.54699	7.70775	5.68836	27.5489	29.5193	22.9697
VDAG_JR2_Chr1g05030.1-6	1.69974	0.00808289	0.0224448	2.331	4.81734	28.4418	35.9334	34.6089	37.048
VDAG_JR2_Chr1g05040.1-1	1.48359	1.36905e-10	1.8169e-09	90.9089	74.187	109.501	241.951	281.961	238.589
VDAG_JR2_Chr1g05050.1-1	2.51211	6.49204e-19	2.20962e-17	41.1809	72.2601	76.7928	318.609	442.79	309.721
VDAG_JR2_Chr1g05050.1-2	1.8826	2.03365e-10	2.6491e-09	60.6059	60.6985	122.3	298.247	336.928	248.962
VDAG_JR2_Chr1g05060.1-1	0.128024	0.696806	0.792127	34.1879	39.5022	46.9289	34.7356	49.8775	45.1985
VDAG_JR2_Chr1g05060.1-2	0.0861391	0.8361	0.892673	20.202	21.1963	32.708	19.1645	24.4298	32.6022
VDAG_JR2_Chr1g05060.1-3	-0.0209798	0.938874	0.962027	82.3619	69.3697	105.235	69.4712	86.5222	94.1019
VDAG_JR2_Chr1g05070.1-1	-0.468676	0.647827	0.754489	1054.39	510.638	6419.31	1823.02	1779.3	2166.57
VDAG_JR2_Chr1g05070.1-2	-0.440832	0.655992	0.760885	426.572	215.817	2377.73	758.194	657.569	808.387
VDAG_JR2_Chr1g05080.1-1	0.324893	0.125019	0.218942	172.494	173.424	132.254	198.831	196.456	206.728
VDAG_JR2_Chr1g05080.1-2	0.526145	0.0469643	0.0990898	54.3899	66.4793	55.4615	79.0534	82.4506	91.879
VDAG_JR2_Chr1g05080.1-3	0.282681	0.138582	0.237667	202.797	189.803	203.359	231.171	236.155	256.372
VDAG_JR2_Chr1g05090.1-1	-0.10673	0.627292	0.737819	364.412	293.858	314.282	240.754	362.375	300.089
VDAG_JR2_Chr1g05090.1-2	-0.0250768	0.891255	0.931297	494.171	415.255	470.711	413.234	499.793	443.094
VDAG_JR2_Chr1g05100.1-1	-1.17433	1.18106e-06	8.54278e-06	367.52	587.716	501.997	221.589	175.08	247.481
VDAG_JR2_Chr1g05100.1-2	-1.08587	0.00210163	0.00704878	46.6199	59.735	41.2406	27.5489	21.3761	21.4878
VDAG_JR2_Chr1g05110.1-1	0.0142775	0.952862	0.970682	143.745	143.557	129.41	108.998	171.009	140.782
VDAG_JR2_Chr1g05110.1-2	-0.0564312	0.855759	0.906477	46.6199	46.2465	38.3964	39.5267	42.7521	44.4576
VDAG_JR2_Chr1g05110.1-3	0.186993	0.299485	0.432191	1064.49	1108.95	1150.47	1085.19	1463.75	1232.96
VDAG_JR2_Chr1g05120.1-1	-1.30879	0.000568333	0.00224396	51.2819	38.5387	38.3964	19.1645	15.2686	17.783
VDAG_JR2_Chr1g05120.1-2	-0.781695	4.26571e-06	2.76488e-05	548.561	558.812	514.796	321.005	321.659	302.312
VDAG_JR2_Chr1g05150.1-1	0.0254401	0.949141	0.96832	38.0729	56.8446	41.2406	64.6801	22.394	51.8672
VDAG_JR2_Chr1g05160.1-1	0.335699	0.297177	0.429742	41.9579	57.8081	32.708	50.3067	53.9491	63.7225
VDAG_JR2_Chr1g05160.1-2	0.17716	0.282168	0.413048	528.359	489.442	554.615	594.099	587.333	594.991
VDAG_JR2_Chr1g05170.1-1	-0.276258	0.476714	0.609305	24.087	49.1369	48.351	40.7245	32.5731	26.6745
VDAG_JR2_Chr1g05170.1-3	-0.191797	0.744579	0.826975	15.54	7.70775	14.2209	14.3734	13.2328	5.92768
VDAG_JR2_Chr1g05170.1-4	0.179102	0.4223	0.559284	127.428	141.63	127.988	138.942	174.062	137.078
VDAG_JR2_Chr1g05170.1-6	0.236088	0.546033	0.670903	20.202	30.831	32.708	43.1201	28.5014	26.6745
VDAG_JR2_Chr1g05180.1-1	-0.992249	8.31915e-06	5.0935e-05	303.807	404.657	307.171	170.085	145.561	194.131
VDAG_JR2_Chr1g05180.1-2	-1.01631	2.21119e-06	1.52019e-05	402.485	573.264	435.159	253.929	207.653	236.366
VDAG_JR2_Chr1g05180.1-3	-0.890497	4.78191e-05	0.000247183	358.196	489.442	331.347	216.798	197.474	222.288
VDAG_JR2_Chr1g05190.1-2	0.514558	0.103432	0.188593	40.4039	60.6985	34.1301	57.4934	66.164	70.3912
VDAG_JR2_Chr1g05200.1-1	-0.114299	0.532532	0.659116	613.829	480.771	501.997	501.87	500.811	474.955
VDAG_JR2_Chr1g05210.1-1	-0.187649	0.571076	0.692985	76.9229	58.7716	126.566	63.4823	68.1999	94.8428
VDAG_JR2_Chr1g05210.1-2	-0.176387	0.560324	0.683227	70.7069	63.5889	109.501	56.2956	81.4327	74.8369
VDAG_JR2_Chr1g05230.1-1	-0.818731	3.39776e-05	0.00018148	725.717	655.158	937.157	433.596	427.521	450.503
VDAG_JR2_Chr1g05240.1-1	-0.240212	0.366181	0.502707	176.379	112.726	206.203	125.767	138.436	152.638
VDAG_JR2_Chr1g05240.1-2	-0.527981	0.0810018	0.154486	90.9089	56.8446	106.657	61.0867	59.0387	55.572
VDAG_JR2_Chr1g05250.1-1	1.17919	0.00521013	0.0154472	20.202	21.1963	62.5719	79.0534	59.0387	89.6561
VDAG_JR2_Chr1g05250.1-2	1.1083	0.00103465	0.00379862	23.31	33.7214	54.0394	81.449	78.3789	73.355
VDAG_JR2_Chr1g05250.1-3	1.01925	0.00184961	0.00631704	30.303	33.7214	56.8836	64.6801	83.4685	90.3971
VDAG_JR2_Chr1g05260.1-3	2.8792	2.99481e-11	4.3462e-10	9.32399	6.74428	7.11044	53.9001	52.9312	65.9454
VDAG_JR2_Chr1g05270.1-3	0.48576	0.415626	0.552907	8.54699	6.74428	9.95462	11.9778	15.2686	8.15056
VDAG_JR2_Chr1g05290.1-1	-2.04583	5.16423e-16	1.30946e-14	343.433	505.821	405.295	108.998	120.113	76.3188
VDAG_JR2_Chr1g05290.1-2	-1.87988	2.09892e-10	2.73099e-09	257.964	486.551	364.055	104.207	126.221	71.8731
VDAG_JR2_Chr1g05290.1-3	-1.16877	2.73969e-06	1.84947e-05	181.041	272.661	257.398	106.602	120.113	89.6561
VDAG_JR2_Chr1g05300.1-1	0.365807	0.660115	0.763708	94.0169	126.214	617.187	422.816	358.304	296.384
VDAG_JR2_Chr1g05300.1-2	0.276756	0.732537	0.818684	219.114	262.063	1312.59	789.337	747.145	635.002
VDAG_JR2_Chr1g05310.1-1	0.642332	0.0147213	0.0374599	861.692	955.76	1706.51	1930.82	1913.67	1648.64
VDAG_JR2_Chr1g05320.1-1	1.95664	1.08757e-17	3.31957e-16	1479.41	2355.68	1376.58	6778.23	6943.15	6515.26
VDAG_JR2_Chr1g05320.1-2	2.09391	1.57843e-17	4.74154e-16	3541.56	6845.44	5190.62	21933.7	24825.8	19736.9
VDAG_JR2_Chr1g05330.1-1	1.70173	9.51306e-11	1.29244e-09	41.9579	34.6849	44.0848	132.954	136.4	122.258
VDAG_JR2_Chr1g05330.1-2	1.28987	0.0100084	0.0269981	10.878	7.70775	8.53253	17.9667	23.4119	25.1926
VDAG_JR2_Chr1g05340.1-1	0.1241	0.567343	0.689644	155.4	144.52	137.943	154.514	142.507	180.053
VDAG_JR2_Chr1g05340.1-2	-0.0283127	0.931704	0.957308	37.2959	42.3926	59.7277	35.9334	49.8775	48.1624
VDAG_JR2_Chr1g05350.1-1	2.70522	2.43906e-06	1.6613e-05	3.88499	2.8904	8.53253	40.7245	23.4119	29.6384
VDAG_JR2_Chr1g05350.1-2	2.98092	2.18372e-20	8.37095e-19	14.763	25.0502	12.7988	149.722	140.471	131.15
VDAG_JR2_Chr1g05360.1-1	0.778896	0.0371681	0.0816201	22.533	35.6483	19.9092	45.5156	35.6268	53.3491
VDAG_JR2_Chr1g05360.1-3	1.51998	0.0123839	0.0323869	5.43899	10.5981	2.84418	13.1756	25.4477	17.0421
VDAG_JR2_Chr1g05370.1-1	1.41984	0.00456835	0.0137613	5.43899	13.4886	9.95462	22.7578	25.4477	27.4155
VDAG_JR2_Chr1g05370.1-2	2.68639	8.41873e-05	0.000410042	2.331	3.85387	2.84418	23.9556	16.2865	17.783
VDAG_JR2_Chr1g05370.1-3	2.09442	0.0101057	0.0272091	1.554	9.63468	0	19.1645	8.14327	22.2288
VDAG_JR2_Chr1g05390.1-2	4.22878	5.45642e-08	5.00979e-07	2.331	1.92694	0	31.1423	26.4656	33.3432
VDAG_JR2_Chr1g05400.1-1	5.14768	1.71103e-18	5.61384e-17	3.108	2.8904	1.42209	87.4379	105.862	85.9513
VDAG_JR2_Chr1g05410.1-1	3.1726	1.95606e-15	4.64922e-14	9.32399	10.5981	5.68836	85.0423	81.4327	72.614
VDAG_JR2_Chr1g05410.1-2	3.55197	7.36582e-22	3.12327e-20	17.094	29.8675	7.11044	184.458	282.978	188.204
VDAG_JR2_Chr1g05420.1-1	8.42121	4.98149e-16	1.26736e-14	1.554	0	0	238.358	214.779	223.77
VDAG_JR2_Chr1g05420.1-2	8.44948	4.71337e-12	7.66049e-11	0	0	0	71.8668	57.0029	68.1683
VDAG_JR2_Chr1g05420.1-3	8.42276	5.18655e-12	8.35204e-11	0	0	0	63.4823	66.164	63.7225
VDAG_JR2_Chr1g05460.1-1	0.0162429	0.956583	0.972561	45.0659	73.2236	62.5719	59.889	65.1461	57.0539
VDAG_JR2_Chr1g05470.1-1	0.648642	0.136888	0.235365	13.986	24.0867	18.4872	37.1312	19.3403	31.8613
VDAG_JR2_Chr1g05470.1-2	1.8145	0.00383256	0.0118667	4.66199	3.85387	5.68836	15.5711	13.2328	20.0059
VDAG_JR2_Chr1g05480.1-1	1.9209	0.00043965	0.00178925	8.54699	5.78081	4.26627	31.1423	23.4119	19.265
VDAG_JR2_Chr1g05490.1-2	0.153104	0.556846	0.680006	64.4909	73.2236	83.9032	73.0645	82.4506	88.1742
VDAG_JR2_Chr1g05500.1-1	0.654218	0.014133	0.0361785	65.2679	77.0775	93.8579	150.92	109.934	108.921
VDAG_JR2_Chr1g05500.1-2	1.17486	6.12597e-07	4.66673e-06	124.32	133.922	172.073	348.554	362.375	256.372
VDAG_JR2_Chr1g05510.1-1	0.425966	0.0451974	0.0959486	142.191	138.739	137.943	162.898	209.689	189.686
VDAG_JR2_Chr1g05510.1-2	0.298929	0.167701	0.276166	156.954	155.118	206.203	229.974	208.671	196.354
VDAG_JR2_Chr1g05510.1-3	0.263883	0.324903	0.459591	66.0449	58.7716	69.6824	91.0312	70.2357	72.614
VDAG_JR2_Chr1g05510.1-4	0.0267015	0.943093	0.964657	25.641	32.7579	24.1755	27.5489	25.4477	31.1203
VDAG_JR2_Chr1g05520.1-1	0.158188	0.510552	0.640404	531.467	340.104	311.437	467.134	403.092	454.208
VDAG_JR2_Chr1g05520.1-2	-0.388899	0.387996	0.524748	27.195	24.0867	18.4872	26.3511	15.2686	13.3373
VDAG_JR2_Chr1g05520.1-4	0.251605	0.192842	0.307064	257.964	209.073	240.333	292.258	266.692	283.788
VDAG_JR2_Chr1g05540.1-2	0.658276	0.0764175	0.147335	66.0449	81.8948	35.5522	108.998	57.0029	125.963
VDAG_JR2_Chr1g05540.1-5	0.473856	0.365246	0.501728	31.857	44.3195	5.68836	43.1201	25.4477	47.4214
VDAG_JR2_Chr1g05550.1-1	-6.61855	6.69211e-89	5.25446e-86	1281.27	2480.93	2680.64	25.1534	23.4119	17.783
VDAG_JR2_Chr1g05550.1-2	-7.99379	1.12712e-19	4.07373e-18	168.609	310.237	250.288	2.39556	0	0.74096
VDAG_JR2_Chr1g05560.1-1	-1.88498	4.18461e-18	1.32522e-16	481.739	458.611	506.264	99.4157	135.382	154.12
VDAG_JR2_Chr1g05560.1-2	-1.6893	8.75044e-21	3.45316e-19	689.975	730.309	824.812	215.6	237.173	241.553
[truncated: 20,796 more rows]

## Sheet: Figure S11b
Figure S11b
In two biological replicates, 15 tomato plants per treatment were inoculated with water (mock) or independent cultures of each strain.
Plants were categorized as described in the Materials & Methods section under 'Infection of tomato plants'.
	Mock	WT	ΔVDH1/4/5
Healthy plants	30	1	3
Weak symptoms	0	5	7
Strong symptoms	0	20	20
Very strong symptoms	0	4	0
Number of plants (n)	30	30	30

## Sheet: Figure S13
Figure S13
Each value represents the number of spores determined per culture. The mean values of four technical replicates were used as one biological replicate (n=1).
Means and standard deviations of the biological replicates were calculated. The mean of the data from the wild-type strain was set to one. The other data were calculated relative to the wild-type strain.
		WT	ΔVDH2	ΔVDH2/5	ΔVDH2/4/5
Experiment 1	Biological replicate 1	326400000	361100000	323400000
		344900000	378300000	305100000
		388800000	356100000	384200000
		414700000	358000000	316000000
	Biological replicate 2	379400000	361600000
		362900000	295200000
		357700000	292800000
		300400000	237600000
Experiment 2	Biological replicate 1	324400000	449200000	354700000	390400000
		327400000	382600000	303800000	347300000
		338300000	472100000	361600000	370900000
		308900000	376600000	348500000	346900000
	Biological replicate 2	351300000		346600000	321000000
		342300000		413100000	361600000
		397300000		4.496e+08	2.68e+08
		352600000		467200000	319100000
Experiment 3	Biological replicate 1	387600000	345200000	307800000	328100000
		386900000	369700000	301000000	343900000
		4.039e+08	348100000	319700000	341500000
		388200000	363400000	367500000	342200000
	Biological replicate 2	379200000	293700000	291800000	281700000
		347500000	249300000	297100000	320100000
		321000000	210500000	337000000	317900000
		367600000	211400000	338100000	329700000
	n	6	5	5	4
